# Supplementary material for: HNRNPA2B1 is a potential biomarker of breast cancer related to prognosis and immune infiltration
Source: Aging (Albany NY). 2023 Sep 5;15(17):8712–28. doi: 10.18632/aging.204992 (PMC10522385; doi:10.18632/aging.204992)
Supplement: Supplementary Table 1 [file aging-15-204992-s002.xlsx]

## Sheet: Supplementary Table 1
Supplementary Table 1. The clinical information of BRCA in TCGA database.
Sample	group_status	clinical	repeat	gender	race	age	menopause	location	initial_pathologic_diagnosis_method	histological_type.x	neoadjuvant_treatment	surgical_name	axillary_type	margin_status.x	lymph_node_examined_count	N_positive	stage_event.tnm_categories.pathologic_categories.pathologic_N	stage_event.tnm_categories.pathologic_categories.pathologic_T	stage_event.pathologic_stage	stage_event.tnm_categories.pathologic_categories.pathologic_M	radiation_therapy	radiation_therapy	drug.drug_name	drug.measure_of_response	drug.regimen_indication	Molecular type	ER	ER_percentage	PR	PR_percent	her2	her2_level	her2_fish	vital_status.x	Tumor.status	OS	OS.time.y	PFI	PFI.time	New.event.time	New.event	Event.type	Event.site
TCGA-3C-AAAU-01A-11R-A41B-07	Tumor	Yes	No	FEMALE	WHITE	55	Pre (<6 months since LMP AND no prior bilateral ovariectomy AND not on estrogen replacement)	Left Lower Outer Quadrant	Not Available	Infiltrating Lobular Carcinoma	No	Modified Radical Mastectomy	Sentinel lymph node biopsy plus axillary dissection	Negative	13	4	N2	TX	Stage X	MX	NO;NO	NO	Zoladex	Not Applicable	Not Available		Positive	50-59%	Positive	50-59%	Negative	Not Available	Not Available	Alive	WITH TUMOR	0	4047	1	1808	1808	1	Distant Metastasis	Lung
TCGA-3C-AALI-01A-11R-A41B-07	Tumor	Yes	No	FEMALE	BLACK OR AFRICAN AMERICAN	50	Post (prior bilateral ovariectomy OR >12 mo since LMP with no prior hysterectomy)	Right Upper Outer Quadrant	Core needle biopsy	Infiltrating Ductal Carcinoma	No	Lumpectomy	Sentinel lymph node biopsy plus axillary dissection	Negative	15	1	N1	T2	Stage IIB	M0	YES	YES	Poly E	Complete Response	Not Available	Her-2	Positive	<10%	Positive	<10%	Positive	Not Available	Not Available	Alive	TUMOR FREE	0	4005	0	4005
TCGA-3C-AALJ-01A-31R-A41B-07	Tumor	Yes	No	FEMALE	BLACK OR AFRICAN AMERICAN	62	Post (prior bilateral ovariectomy OR >12 mo since LMP with no prior hysterectomy)	Right	Core needle biopsy	Infiltrating Ductal Carcinoma	No	Modified Radical Mastectomy	Not Available	Negative	23	1	N1	T2	Stage IIB	M0	NO;NO	NO	Metformin;Trastuzumab;Doxorubicin;Cyclophosphamide;Herceptin	Unknown;Not Available;Unknown;Unknown;Not Available	Not Available;Not Available;Not Available;Not Available;Not Available		Positive	90-99%	Positive	30-39%	Negative	Not Available	Not Available	Alive	TUMOR FREE	0	1474	0	1474
TCGA-3C-AALK-01A-11R-A41B-07	Tumor	Yes	No	FEMALE	BLACK OR AFRICAN AMERICAN	52	Unknown	Right	Core needle biopsy	Infiltrating Ductal Carcinoma	No	Simple Mastectomy	Sentinel node biopsy alone	Close	2	1	N0 (i+)	T1c	Stage IA	M0	NO;NO	Unknown	Docetaxel;Herceptin;Carboplatin;Trastuzumab	Unknown;Unknown;Unknown;Unknown	Not Available;Not Available;Not Available;Not Available	Her-2	Positive	70-79%	Positive	80-89%	Positive	Not Available	Not Available	Alive	TUMOR FREE	0	1448	0	1448
TCGA-4H-AAAK-01A-12R-A41B-07	Tumor	Yes	No	FEMALE	WHITE	50	Post (prior bilateral ovariectomy OR >12 mo since LMP with no prior hysterectomy)	Left;Left Upper Outer Quadrant	Core needle biopsy	Infiltrating Lobular Carcinoma	No	Modified Radical Mastectomy	Axillary lymph node dissection alone	Negative	14	4	N2	T2	Stage IIIA	M0	NO	NO	Cyclophosphamide;Doxorubicin;5-Fluorouracil	Complete Response;Complete Response;Complete Response	Not Available;Not Available;Not Available		Positive	60-69%	Positive	70-79%	Negative	2+	Not Available	Alive	TUMOR FREE	0	348	0	348
TCGA-5L-AAT0-01A-12R-A41B-07	Tumor	Yes	No	FEMALE	WHITE	42	Post (prior bilateral ovariectomy OR >12 mo since LMP with no prior hysterectomy)	Right;Right Lower Outer Quadrant	Incisional Biopsy	Infiltrating Lobular Carcinoma	No	Modified Radical Mastectomy	Axillary lymph node dissection alone	Positive	8	0	N0	T2	Stage IIA	M0		YES	Tamoxifen	Not Applicable	Not Available		Positive	70-79%	Positive	50-59%	Negative	1+	Not Available	Alive	TUMOR FREE	0	1477	0	1477
TCGA-5L-AAT1-01A-12R-A41B-07	Tumor	Yes	No	FEMALE	WHITE	63	Post (prior bilateral ovariectomy OR >12 mo since LMP with no prior hysterectomy)	Left	Tumor resection	Infiltrating Lobular Carcinoma	No	Simple Mastectomy	Other (specify)	Negative	1	0	N0	T2	Stage IV	M1		NO	Letrozol	Not Applicable	Not Available		Positive	80-89%	Positive	10-19%	Negative	2+	Not Available	Alive	WITH TUMOR	0	1471	0	1471
TCGA-5T-A9QA-01A-11R-A41B-07	Tumor	Yes	No	FEMALE	BLACK OR AFRICAN AMERICAN	52	Unknown	Left	Excisional Biopsy	Other, specify	No	Unknown	No axillary staging	Unknown	Not Available	Not Available	NX	T2	Stage IIA	MX	YES	Unknown	Adriamycin;Letrozole;Taxol;Cytoxan	Complete Response;Not Available;Not Available;Complete Response	Not Available;Not Available;Not Available;Not Available		Positive	70-79%	Negative	Not Available	Negative	2+	Not Available	Alive		0	303	0	303
TCGA-A1-A0SB-01A-11R-A144-07	Tumor	Yes	No	FEMALE	WHITE	70	Post (prior bilateral ovariectomy OR >12 mo since LMP with no prior hysterectomy)	Left	Fine needle aspiration biopsy	Other, specify	No	Lumpectomy	Sentinel node biopsy alone	Negative	2	0	N0	T1c	Stage I	M0		Not Available					Positive	70-79%	Negative	Not Available	Negative	Not Available	Not Available	Alive	TUMOR FREE	0	259	0	259
TCGA-A1-A0SD-01A-11R-A115-07	Tumor	Yes	No	FEMALE	WHITE	59	Peri (6-12 months since last menstrual period)	Left	Core needle biopsy	Infiltrating Ductal Carcinoma	No	Lumpectomy	Sentinel lymph node biopsy plus axillary dissection	Positive	3	0	N0	T2	Stage IIA	M0		Not Available					Positive	90-99%	Positive	90-99%	Negative	Not Available	Not Available	Alive		0	437	0	437
TCGA-A1-A0SE-01A-11R-A084-07	Tumor	Yes	No	FEMALE	WHITE	56	Pre (<6 months since LMP AND no prior bilateral ovariectomy AND not on estrogen replacement)	Left Upper Outer Quadrant	Core needle biopsy	Mixed Histology (please specify)	No	Modified Radical Mastectomy	Sentinel lymph node biopsy plus axillary dissection	Negative	8	0	N0	T1c	Stage I	M0		Not Available					Positive	80-89%	Positive	90-99%	Negative	1+	1	Alive	TUMOR FREE	0	1321	0	1321
TCGA-A1-A0SF-01A-11R-A144-07	Tumor	Yes	No	FEMALE	WHITE	54	Pre (<6 months since LMP AND no prior bilateral ovariectomy AND not on estrogen replacement)	Left	Fine needle aspiration biopsy	Infiltrating Ductal Carcinoma	No	Modified Radical Mastectomy	Sentinel lymph node biopsy plus axillary dissection	Negative	2	0	N0	T2	Stage IIA	M0		Not Available	arimidex;tamoxifen;tc	Not Available;Not Available;Not Available	ADJUVANT;ADJUVANT;ADJUVANT		Positive	90-99%	Positive	90-99%	Negative	Not Available	Not Available	Alive	TUMOR FREE	0	1463	0	1463
TCGA-A1-A0SG-01A-11R-A144-07	Tumor	Yes	No	FEMALE	WHITE	61	Post (prior bilateral ovariectomy OR >12 mo since LMP with no prior hysterectomy)	Right	Core needle biopsy	Other, specify	No	Lumpectomy	Sentinel lymph node biopsy plus axillary dissection	Negative	11	1	N1	T2	Stage IIB	M0		Not Available	Not Available	Not Available	ADJUVANT		Positive	90-99%	Positive	90-99%	Negative	Not Available	Not Available	Alive		0	434	0	434
TCGA-A1-A0SH-01A-11R-A084-07	Tumor	Yes	No	FEMALE	WHITE	39	Pre (<6 months since LMP AND no prior bilateral ovariectomy AND not on estrogen replacement)	Left Upper Inner Quadrant	Fine needle aspiration biopsy	Infiltrating Ductal Carcinoma	No	Lumpectomy	Sentinel node biopsy alone	Negative	2	0	N0	T2	Stage IIA	M0		Not Available	TC	Not Available	ADJUVANT		Negative	Not Available	Positive	90-99%	Negative	2+	1.4	Alive	TUMOR FREE	0	1437	0	1437
TCGA-A1-A0SI-01A-11R-A144-07	Tumor	Yes	No	FEMALE	WHITE	52	Peri (6-12 months since last menstrual period)	Right	Fine needle aspiration biopsy	Infiltrating Ductal Carcinoma	No	Lumpectomy	Sentinel lymph node biopsy plus axillary dissection	Negative	23	1	N1	T2	Stage IIB	M0		Not Available					Positive	50-59%	Positive	10-19%	Negative	Not Available	Not Available	Alive	TUMOR FREE	0	635	0	635
TCGA-A1-A0SJ-01A-11R-A084-07	Tumor	Yes	No	FEMALE	BLACK OR AFRICAN AMERICAN	39	Pre	Left	Core needle biopsy	Infiltrating Ductal Carcinoma	No	Modified Radical Mastectomy	Sentinel lymph node biopsy plus axillary dissection	Negative	19	3	N1	T3	Stage IIIA	M0		Not Available					Positive	70-79%	Positive	10-19%	Negative	2+	1	Alive	TUMOR FREE	0	416	0	416
TCGA-A1-A0SK-01A-12R-A084-07	Tumor	Yes	No	FEMALE	ASIAN	54	Peri (6-12 months since last menstrual period)	Right Upper Outer Quadrant	Excisional Biopsy	Other, specify	No	Lumpectomy	Sentinel lymph node biopsy plus axillary dissection	Positive	4	0	N0	T2	Stage IIA	M0	Not Available	Not Available				TNBC	Negative	Not Available	Negative	Not Available	Negative	0	Not Available	Dead	WITH TUMOR	1	967	1	967
TCGA-A1-A0SM-01A-11R-A084-07	Tumor	No	No	MALE	WHITE	77	Post	Left	Core needle biopsy	Infiltrating Ductal Carcinoma	No	Modified Radical Mastectomy	Sentinel lymph node biopsy plus axillary dissection	Negative	3	0	N0	T2	Stage IIA	M0		Not Available				Her-2	Positive	20-29%	Negative	Not Available	Positive	3+	11	Alive	TUMOR FREE	0	242	0	242
TCGA-A1-A0SN-01A-11R-A144-07	Tumor	Yes	No	FEMALE	WHITE	50	Post (prior bilateral ovariectomy OR >12 mo since LMP with no prior hysterectomy)	Left	Core needle biopsy	Infiltrating Ductal Carcinoma	No	Lumpectomy	Sentinel lymph node biopsy plus axillary dissection	Negative	13	4	N2	T1c	Stage IIA	MX		Not Available	ac;taxol;herceptin	Not Available;Not Available;Not Available	ADJUVANT;ADJUVANT;ADJUVANT	Her-2	Positive	90-99%	Positive	60-69%	Positive	Not Available	Not Available	Alive	TUMOR FREE	0	1196	0	1196
TCGA-A1-A0SO-01A-22R-A084-07	Tumor	Yes	No	FEMALE	WHITE	67	Post (prior bilateral ovariectomy OR >12 mo since LMP with no prior hysterectomy)	Right	Core needle biopsy	Infiltrating Ductal Carcinoma	No	Modified Radical Mastectomy	Sentinel lymph node biopsy plus axillary dissection	Negative	9	1	N1	T2	Stage IIB	M0		Not Available	Not Available	Not Available	ADJUVANT	TNBC	Negative	Not Available	Negative	Not Available	Negative	1+	1.6	Alive	TUMOR FREE	0	852	0	852
TCGA-A1-A0SP-01A-11R-A084-07	Tumor	Yes	No	FEMALE	Not Available	40	Pre	Right	Fine needle aspiration biopsy	Infiltrating Ductal Carcinoma	Not Available	Lumpectomy	Axillary lymph node dissection alone	Negative	3	0	N0	T2	Stage IIA	M0		Not Available	Not Available	Not Available	ADJUVANT	TNBC	Negative	Not Available	Negative	Not Available	Negative	0	Not Available	Alive	TUMOR FREE	0	584	0	584
TCGA-A1-A0SQ-01A-21R-A144-07	Tumor	Yes	No	FEMALE	WHITE	45	Pre (<6 months since LMP AND no prior bilateral ovariectomy AND not on estrogen replacement)	Left	Core needle biopsy	Infiltrating Ductal Carcinoma	No	Modified Radical Mastectomy	Sentinel lymph node biopsy plus axillary dissection	Negative	15	1	N1	T2	Stage IIB	MX		Not Available	ac;tamoxifen;taxol	Not Available;Not Available;Not Available	ADJUVANT;ADJUVANT;ADJUVANT		Positive	90-99%	Positive	90-99%	Negative	Not Available	Not Available	Alive	TUMOR FREE	0	554	0	554
TCGA-A2-A04N-01A-11R-A115-07	Tumor	Yes	No	FEMALE	WHITE	66	Post (prior bilateral ovariectomy OR >12 mo since LMP with no prior hysterectomy)	Right	Fine needle aspiration biopsy	Infiltrating Ductal Carcinoma	No	Lumpectomy	Other (specify)	Negative	6	0	N0	T1c	Stage IA	M0	YES;YES	Not Available	Arimidex;Cytoxan;Adriamycin	Not Available;Not Available;Not Available	ADJUVANT;ADJUVANT;ADJUVANT		Positive	Not Available	Positive	Not Available	Negative	1+	1.2	Alive	TUMOR FREE	0	4354	0	4354
TCGA-A2-A04P-01A-31R-A034-07	Tumor	Yes	No	FEMALE	BLACK OR AFRICAN AMERICAN	36	Pre (<6 months since LMP AND no prior bilateral ovariectomy AND not on estrogen replacement)	Left	Excisional Biopsy	Infiltrating Ductal Carcinoma	No	Lumpectomy	Axillary lymph node dissection alone	Positive	20	18	N3	T2	Stage IIIC	M0	YES;YES;YES	Not Available	Exemestane;TAXOTERE;ADRIAMYCIN;NAVELBINE;Cisplatin;TAXOL;XELODA;GEMZAR	Not Available;Not Available;Not Available;Not Available;Not Available;Not Available;Not Available;Not Available	PROGRESSION;PROGRESSION;PROGRESSION;PROGRESSION;PROGRESSION;ADJUVANT;RECURRENCE;PROGRESSION	TNBC	Negative	<10%	Negative	<10%	Negative	1+	1.3	Dead	WITH TUMOR	1	548	1	102	102	1	Locoregional Recurrence;Distant Metastasis	Other, specify;Bone;Lung;Liver
TCGA-A2-A04Q-01A-21R-A034-07	Tumor	Yes	No	FEMALE	WHITE	48	Post (prior bilateral ovariectomy OR >12 mo since LMP with no prior hysterectomy)	Right Upper Outer Quadrant;Right	Other method, specify:	Infiltrating Ductal Carcinoma	No	Simple Mastectomy	Other (specify)	Negative	3	0	N0	T1	Stage IA	M0	NO;NO	Not Available	ADRIAMYCIN;CYTOXAN	Not Available;Not Available	ADJUVANT;ADJUVANT	TNBC	Negative	<10%	Negative	<10%	Negative	2+	1.4	Alive	TUMOR FREE	0	2385	0	2385
TCGA-A2-A04R-01A-41R-A109-07	Tumor	Yes	No	FEMALE	BLACK OR AFRICAN AMERICAN	36	Pre (<6 months since LMP AND no prior bilateral ovariectomy AND not on estrogen replacement)	Left Upper Inner Quadrant	Core needle biopsy	Infiltrating Ductal Carcinoma	No	Lumpectomy	Sentinel node biopsy alone	Negative	1	0	N0	T1	Stage IA	M0	YES;YES	Not Available	CYTOXAN;Adriamycin;Anastrozole;Tamoxifen;TAXOL	Not Available;Not Available;Not Available;Not Available;Not Available	ADJUVANT;ADJUVANT;ADJUVANT;ADJUVANT;ADJUVANT		Positive	60-69%	Positive	80-89%	Negative	2+	1.1	Alive	TUMOR FREE	0	3709	0	3709
TCGA-A2-A04T-01A-21R-A034-07	Tumor	Yes	No	FEMALE	WHITE	62	Post (prior bilateral ovariectomy OR >12 mo since LMP with no prior hysterectomy)	Left Upper Inner Quadrant	Core needle biopsy	Infiltrating Ductal Carcinoma	No	Lumpectomy	Sentinel node biopsy alone	Negative	3	0	N0	T2	Stage IIA	M0	YES	Not Available	Cyclophosphamide;Taxol;Adriamycin	Not Available;Not Available;Not Available	ADJUVANT;ADJUVANT;ADJUVANT	TNBC	Negative	<10%	Negative	<10%	Negative	2+	1.1	Alive	TUMOR FREE	0	2246	0	2246
TCGA-A2-A04U-01A-11R-A115-07	Tumor	Yes	No	FEMALE	WHITE	47	Pre	Right	Core needle biopsy	Infiltrating Ductal Carcinoma	No	Simple Mastectomy	Sentinel node biopsy alone	Negative	3	1	N0 (i+)	T2	Stage IIA	M0	NO;NO	Not Available	Adriamycin;Zometa;Cytoxan;Taxotere	Not Available;Not Available;Not Available;Not Available	ADJUVANT;ADJUVANT;ADJUVANT;ADJUVANT	Her-2	Negative	<10%	Negative	<10%	Positive	1+	2.2	Alive	TUMOR FREE	0	2654	0	2654
TCGA-A2-A04V-01A-21R-A034-07	Tumor	Yes	No	FEMALE	WHITE	39	Pre (<6 months since LMP AND no prior bilateral ovariectomy AND not on estrogen replacement)	Right Lower Outer Quadrant;Right	Core needle biopsy	Infiltrating Ductal Carcinoma	No	Simple Mastectomy	Sentinel node biopsy alone	Negative	2	0	N0	T2	Stage IIA	M0	NO	Not Available	CYTOXAN;EXEMESTANE;TAMOXIFEN;LETROZOLE;XELODA;ADRIAMYCIN	Not Available;Not Available;Not Available;Not Available;Not Available;Not Available	ADJUVANT;ADJUVANT;ADJUVANT;ADJUVANT;RECURRENCE;ADJUVANT		Positive	90-99%	Positive	10-19%	Negative	2+	1.1	Dead	WITH TUMOR	1	1920	1	1470	1470	1
TCGA-A2-A04W-01A-31R-A115-07	Tumor	Yes	No	FEMALE	WHITE	50	Pre (<6 months since LMP AND no prior bilateral ovariectomy AND not on estrogen replacement)	Right Upper Outer Quadrant	Core needle biopsy	Other, specify	No	Modified Radical Mastectomy	Axillary lymph node dissection alone	Negative	19	1	N1mi	T2	Stage IIB	M0	NO;NO	Not Available	Cytoxan;Adriamycin;Taxol;Herceptin;Zometa	Not Available;Not Available;Not Available;Not Available;Not Available	ADJUVANT;ADJUVANT;ADJUVANT;ADJUVANT;ADJUVANT	Her-2	Negative	<10%	Negative	<10%	Positive	2+	3.2	Alive	TUMOR FREE	0	3102	0	3102
TCGA-A2-A04X-01A-21R-A034-07	Tumor	Yes	No	FEMALE	WHITE	34	Pre (<6 months since LMP AND no prior bilateral ovariectomy AND not on estrogen replacement)	Left	Core needle biopsy	Infiltrating Ductal Carcinoma	No	Simple Mastectomy	Sentinel node biopsy alone	Negative	3	0	N0	T2	Stage IIA	M0	NO	Not Available	ADRIAMYCIN;CYTOXAN;HERCEPTIN;TAXOL;TAMOXIFEN	Not Available;Not Available;Not Available;Not Available;Not Available	ADJUVANT;ADJUVANT;ADJUVANT;ADJUVANT;ADJUVANT	Her-2	Positive	80-89%	Positive	50-59%	Positive	3+	3.2	Alive	TUMOR FREE	0	1686	0	1686
TCGA-A2-A04Y-01A-21R-A034-07	Tumor	Yes	No	FEMALE	WHITE	53	Post (prior bilateral ovariectomy OR >12 mo since LMP with no prior hysterectomy)	Right Upper Outer Quadrant	Core needle biopsy	Infiltrating Ductal Carcinoma	No	Simple Mastectomy	Sentinel lymph node biopsy plus axillary dissection	Negative	13	1	N1mi	T2	Stage IIB	M0	YES	Not Available	Cytoxan;Herceptin;Adriamycin;Zometa;Taxol;Tamoxifen;Arimidex	Not Available;Not Available;Not Available;Not Available;Not Available;Not Available;Not Available	ADJUVANT;ADJUVANT;ADJUVANT;OTHER, SPECIFY IN NOTES;ADJUVANT;ADJUVANT;ADJUVANT		Positive	90-99%	Positive	10-19%	Negative	1+	1.13	Alive	TUMOR FREE	0	1099	0	1099
TCGA-A2-A0CK-01A-11R-A22K-07	Tumor	Yes	No	FEMALE	WHITE	60	Post (prior bilateral ovariectomy OR >12 mo since LMP with no prior hysterectomy)	Right	Excisional Biopsy	Infiltrating Lobular Carcinoma	No	Lumpectomy	Sentinel lymph node biopsy plus axillary dissection	Positive	20	4	N2	T3	Stage IIIA	M0	YES	Not Available	Adriamycin;Cytoxan;Taxol;Taxotere;Anastrozole;E-75	Complete Response;Complete Response;Complete Response;Complete Response;Not Available;Unknown	Not Available;Not Available;Not Available;Not Available;Not Available;Not Available		Positive	40-49%	Positive	80-89%	Negative	1+	1.1	Alive	TUMOR FREE	0	4159	1	1364	1364	1	New Primary Tumor	Other, specify
TCGA-A2-A0CL-01A-11R-A115-07	Tumor	Yes	No	FEMALE	BLACK OR AFRICAN AMERICAN	37	Pre (<6 months since LMP AND no prior bilateral ovariectomy AND not on estrogen replacement)	Right Lower Outer Quadrant	Core needle biopsy	Infiltrating Ductal Carcinoma	No	Modified Radical Mastectomy	Axillary lymph node dissection alone	Positive	14	9	N2	T3	Stage IIIA	M0	YES;YES	Not Available	Taxol;Cytoxan;Arimidex;Adriamycin;Zometa;Tamoxifen;Gemcitabine	Not Available;Not Available;Not Available;Not Available;Not Available;Not Available;Complete Response	ADJUVANT;ADJUVANT;ADJUVANT;ADJUVANT;OTHER, SPECIFY IN NOTES;ADJUVANT;Not Available		Positive	20-29%	Positive	<10%	Negative	1+	1.1	Alive	TUMOR FREE	0	3015	0	3015
TCGA-A2-A0CM-01A-31R-A034-07	Tumor	Yes	No	FEMALE	BLACK OR AFRICAN AMERICAN	40	Pre (<6 months since LMP AND no prior bilateral ovariectomy AND not on estrogen replacement)	Left	Excisional Biopsy	Infiltrating Ductal Carcinoma	No	Simple Mastectomy	Sentinel node biopsy alone	Negative	1	0	N0	T2	Stage IIA	M0	NO	Not Available	Adriamycin;Capecetabine;Cytoxan;Tamoxifen;Docetaxel;Zometa	Not Available;Not Available;Not Available;Not Available;Not Available;Not Available	ADJUVANT;PROGRESSION;ADJUVANT;ADJUVANT;PROGRESSION;PROGRESSION	TNBC	Negative	<10%	Negative	<10%	Negative	0	Not Available	Dead	WITH TUMOR	1	754	1	382	382	1
TCGA-A2-A0CO-01A-13R-A22K-07	Tumor	Yes	No	FEMALE	WHITE	85	Post (prior bilateral ovariectomy OR >12 mo since LMP with no prior hysterectomy)	Right	Core needle biopsy	Infiltrating Lobular Carcinoma	No	Modified Radical Mastectomy	Axillary lymph node dissection alone	Positive	11	0	N0	T3	Stage IIB	M0	YES	Not Available	Tamoxifen;Arimidex	Complete Response;Unknown	Not Available;Not Available		Positive	40-49%	Positive	20-29%	Negative	1+	1.1	Alive	TUMOR FREE	1	3492	0	3492
TCGA-A2-A0CP-01A-11R-A034-07	Tumor	Yes	No	FEMALE	WHITE	60	Post (prior bilateral ovariectomy OR >12 mo since LMP with no prior hysterectomy)	Right	Core needle biopsy	Infiltrating Ductal Carcinoma	No	Lumpectomy	Sentinel node biopsy alone	Negative	2	0	N0	T1c	Stage IA	M0	YES	Not Available	Anastrozole;Cytoxan;Adriamycin	Not Available;Not Available;Not Available	ADJUVANT;ADJUVANT;ADJUVANT		Positive	90-99%	Positive	90-99%	Negative	Not Available	Not Available	Alive	TUMOR FREE	0	2813	0	2813
TCGA-A2-A0CQ-01A-21R-A034-07	Tumor	Yes	No	FEMALE	BLACK OR AFRICAN AMERICAN	62	Post (prior bilateral ovariectomy OR >12 mo since LMP with no prior hysterectomy)	Right	Core needle biopsy	Infiltrating Ductal Carcinoma	No	Lumpectomy	Sentinel node biopsy alone	Positive	1	0	N0	T1	Stage IA	M0	YES	Not Available	Adriamycin;Arimidex;Cytoxan;AE-37	Not Available;Not Available;Not Available;Not Available	ADJUVANT;ADJUVANT;ADJUVANT;OTHER, SPECIFY IN NOTES		Positive	90-99%	Positive	90-99%	Negative	2+	1.3	Alive	TUMOR FREE	0	2695	0	2695
TCGA-A2-A0CR-01A-11R-A22K-07	Tumor	Yes	No	FEMALE	ASIAN	54	Post (prior bilateral ovariectomy OR >12 mo since LMP with no prior hysterectomy)	Left Upper Inner Quadrant	Core needle biopsy	Infiltrating Lobular Carcinoma	No	Modified Radical Mastectomy	Axillary lymph node dissection alone	Close	16	0	N0	T3	Stage IIB	M0	NO	Not Available	Adriamycin;Cyclophosphamide;Paclitaxel;Tamoxifen;Anastrazole	Complete Response;Complete Response;Complete Response;Complete Response;Not Applicable	Not Available;Not Available;Not Available;Not Available;Not Available		Positive	60-69%	Positive	80-89%	Negative	Not Available	1.2	Alive	TUMOR FREE	0	3283	0	3283
TCGA-A2-A0CS-01A-11R-A115-07	Tumor	Yes	No	FEMALE	WHITE	73	Post (prior bilateral ovariectomy OR >12 mo since LMP with no prior hysterectomy)	Left	Other method, specify:	Infiltrating Ductal Carcinoma	No	Modified Radical Mastectomy	Axillary lymph node dissection alone	Positive	15	12	N3	T4b	Stage IV	M1	YES;YES	Not Available	Zometa;Anastrozole	Not Available;Not Available	OTHER, SPECIFY IN NOTES;ADJUVANT		Positive	80-89%	Positive	80-89%	Negative	2+	1.3	Alive	TUMOR FREE	1	2348	0	2348
TCGA-A2-A0CT-01A-31R-A056-07	Tumor	Yes	No	FEMALE	WHITE	71	Post (prior bilateral ovariectomy OR >12 mo since LMP with no prior hysterectomy)	Right Upper Outer Quadrant	Core needle biopsy	Infiltrating Ductal Carcinoma	No	Simple Mastectomy	Sentinel node biopsy alone	Negative	2	0	N0	T2	Stage IIA	M0	NO	Not Available	Tamoxifen;Cytoxan;Arimidex;Adriamycin	Not Available;Not Available;Not Available;Not Available	ADJUVANT;ADJUVANT;ADJUVANT;ADJUVANT		Positive	90-99%	Negative	<10%	Negative	2+	1.3	Alive	TUMOR FREE	0	2289	0	2289
TCGA-A2-A0CU-01A-12R-A034-07	Tumor	Yes	No	FEMALE	WHITE	73	Post (prior bilateral ovariectomy OR >12 mo since LMP with no prior hysterectomy)	Right Lower Outer Quadrant	Core needle biopsy	Infiltrating Ductal Carcinoma	No	Simple Mastectomy	Sentinel node biopsy alone	Close	1	1	N0 (i+)	T2	Stage IIA	M0	NO	Not Available	Tamoxifen	Not Available	ADJUVANT		Positive	90-99%	Positive	<10%	Negative	2+	1	Dead	TUMOR FREE	1	158	0	158
TCGA-A2-A0CV-01A-31R-A115-07	Tumor	Yes	No	FEMALE	ASIAN	41	Post (prior bilateral ovariectomy OR >12 mo since LMP with no prior hysterectomy)	Left Lower Outer Quadrant	Core needle biopsy	Infiltrating Ductal Carcinoma	No	Modified Radical Mastectomy	Axillary lymph node dissection alone	Negative	18	4	N2	T2	Stage IIB	M0	YES;YES	Not Available	Tamoxifen;Taxol;Cytoxan;Adriamycin	Not Available;Not Available;Not Available;Not Available	ADJUVANT;ADJUVANT;ADJUVANT;ADJUVANT		Positive	90-99%	Positive	90-99%	Negative	1+	1.1	Alive	TUMOR FREE	0	3011	0	3011
TCGA-A2-A0CW-01A-21R-A115-07	Tumor	Yes	No	FEMALE	WHITE	67	Post (prior bilateral ovariectomy OR >12 mo since LMP with no prior hysterectomy)	Right	Core needle biopsy	Infiltrating Ductal Carcinoma	No	Lumpectomy	Sentinel lymph node biopsy plus axillary dissection	Negative	19	2	N1	T2	Stage IIB	M0	NO;NO	Not Available	Anastrozole	Not Available	ADJUVANT		Positive	90-99%	Positive	10-19%	Negative	2+	0.5	Alive	TUMOR FREE	0	3283	0	3283
TCGA-A2-A0CX-01A-21R-A00Z-07	Tumor	Yes	No	FEMALE	WHITE	52	Pre (<6 months since LMP AND no prior bilateral ovariectomy AND not on estrogen replacement)	Left	Core needle biopsy	Infiltrating Ductal Carcinoma	No	Lumpectomy	Sentinel node biopsy alone	Negative	2	0	N0	T2	Stage IIA	M0	YES	Not Available	Zoladex;Adriamycin;Cytoxan;Taxol;Herceptin;Letrozole;Tamoxifen	Not Available;Not Available;Not Available;Not Available;Not Available;Not Available;Not Available	OTHER, SPECIFY IN NOTES;ADJUVANT;ADJUVANT;ADJUVANT;ADJUVANT;ADJUVANT;ADJUVANT	Her-2	Positive	Not Available	Negative	<10%	Positive	3+	Not Available	Alive	TUMOR FREE	0	1728	0	1728
TCGA-A2-A0CY-01A-12R-A034-07	Tumor	Yes	No	FEMALE	WHITE	63	Post (prior bilateral ovariectomy OR >12 mo since LMP with no prior hysterectomy)	Left Lower Outer Quadrant	Core needle biopsy	Infiltrating Ductal Carcinoma	No	Simple Mastectomy	Sentinel lymph node biopsy plus axillary dissection	Negative	22	1	N1	T2	Stage IIB	M0	NO	Not Available	Gemzar;Letrozole;Cytoxan;Taxol;Exemestane;Tamoxifen;Anastrozole;Adriamycin;Anastrozole	Not Available;Not Available;Not Available;Not Available;Not Available;Not Available;Not Available;Not Available;Not Available	ADJUVANT;ADJUVANT;ADJUVANT;ADJUVANT;ADJUVANT;ADJUVANT;ADJUVANT;ADJUVANT;ADJUVANT		Positive	90-99%	Positive	10-19%	Negative	1+	0.89	Alive	TUMOR FREE	0	1673	0	1673
TCGA-A2-A0CZ-01A-11R-A034-07	Tumor	Yes	No	FEMALE	WHITE	46	Pre	Right Upper Inner Quadrant	Core needle biopsy	Infiltrating Ductal Carcinoma	No	Simple Mastectomy	Sentinel node biopsy alone	Positive	2	0	N0	T2	Stage IIA	M0	NO	Not Available	Cytoxan;Adriamycin;Tamoxifen	Not Available;Not Available;Not Available	ADJUVANT;ADJUVANT;ADJUVANT		Positive	90-99%	Positive	20-29%	Negative	1+	1.1	Alive	TUMOR FREE	0	1616	0	1616
TCGA-A2-A0D0-01A-11R-A00Z-07	Tumor	Yes	No	FEMALE	BLACK OR AFRICAN AMERICAN	60	Post (prior bilateral ovariectomy OR >12 mo since LMP with no prior hysterectomy)	Left Upper Outer Quadrant	Core needle biopsy	Infiltrating Ductal Carcinoma	No	Simple Mastectomy	Axillary lymph node dissection alone	Negative	8	0	N0	T2	Stage IIA	M0	NO;NO	Not Available	Cytoxan;Docetaxel	Not Available;Not Available	ADJUVANT;ADJUVANT	TNBC	Negative	<10%	Negative	<10%	Negative	0	1.17	Alive	TUMOR FREE	0	2048	0	2048
TCGA-A2-A0D1-01A-11R-A034-07	Tumor	Yes	No	FEMALE	WHITE	76	Post (prior bilateral ovariectomy OR >12 mo since LMP with no prior hysterectomy)	Left Lower Inner Quadrant	Core needle biopsy	Infiltrating Ductal Carcinoma	No	Lumpectomy	Sentinel node biopsy alone	Negative	2	0	N0	T2	Stage IIA	M0	YES	Not Available	Taxotere;Abraxane;Carboplatin;Herceptin	Not Available;Not Available;Not Available;Not Available	ADJUVANT;ADJUVANT;ADJUVANT;ADJUVANT	Her-2	Negative	<10%	Negative	<10%	Positive	3+	5.5	Alive	TUMOR FREE	0	1051	0	1051
TCGA-A2-A0D2-01A-21R-A034-07	Tumor	Yes	No	FEMALE	WHITE	45	Pre (<6 months since LMP AND no prior bilateral ovariectomy AND not on estrogen replacement)	Left Lower Outer Quadrant	Core needle biopsy	Infiltrating Ductal Carcinoma	No	Simple Mastectomy	Sentinel node biopsy alone	Negative	5	4	N2	T2	Stage IIA	M0	YES	Not Available	Adriamycin;Cytoxan;Taxol	Not Available;Not Available;Not Available	ADJUVANT;ADJUVANT;ADJUVANT	TNBC	Negative	<10%	Negative	<10%	Negative	0	1.05	Alive	TUMOR FREE	0	1027	0	1027
TCGA-A2-A0D3-01A-11R-A115-07	Tumor	Yes	No	FEMALE	WHITE	42	Post (prior bilateral ovariectomy OR >12 mo since LMP with no prior hysterectomy)	Left Lower Outer Quadrant	Core needle biopsy	Infiltrating Ductal Carcinoma	No	Simple Mastectomy	Sentinel node biopsy alone	Negative	1	0	N0	T1c	Stage IA	M0	NO;NO	Not Available	Carboplatin;Tamoxifen;Docetaxel;Herceptin	Not Available;Not Available;Not Available;Not Available	ADJUVANT;ADJUVANT;ADJUVANT;ADJUVANT		Positive	90-99%	Positive	90-99%	Negative	1+	1.41	Alive	TUMOR FREE	0	1873	0	1873
TCGA-A2-A0D4-01A-11R-A00Z-07	Tumor	Yes	No	FEMALE	BLACK OR AFRICAN AMERICAN	37	Pre (<6 months since LMP AND no prior bilateral ovariectomy AND not on estrogen replacement)	Left	Core needle biopsy	Infiltrating Ductal Carcinoma	No	Lumpectomy	Axillary lymph node dissection alone	Negative	23	1	N1	T2	Stage IIB	M0	YES	Not Available	Tamoxifen;Adriamycin;Cytoxan;Taxol	Not Available;Not Available;Not Available;Not Available	ADJUVANT;ADJUVANT;ADJUVANT;ADJUVANT		Positive	90-99%	Positive	10-19%	Negative	1+	1.14	Alive	TUMOR FREE	0	767	0	767
TCGA-A2-A0EM-01A-11R-A034-07	Tumor	Yes	No	FEMALE	WHITE	73	Post (prior bilateral ovariectomy OR >12 mo since LMP with no prior hysterectomy)	Right Upper Inner Quadrant	Core needle biopsy	Infiltrating Ductal Carcinoma	No	Lumpectomy	Sentinel node biopsy alone	Negative	1	0	N0	T1	Stage IA	M0	YES	Not Available	Tamoxifen	Not Available	ADJUVANT		Positive	Not Available	Positive	Not Available	Negative	1+	1.3	Alive	TUMOR FREE	0	3094	0	3094
TCGA-A2-A0EN-01A-13R-A084-07	Tumor	Yes	No	FEMALE	WHITE	70	Post (prior bilateral ovariectomy OR >12 mo since LMP with no prior hysterectomy)	Right	Excisional Biopsy	Infiltrating Lobular Carcinoma	No	Lumpectomy	Sentinel node biopsy alone	Negative	4	1	N0 (i+)	T2	Stage IIA	M0	YES	Not Available	Anastrozole;Tamoxifen	Not Available;Not Available	ADJUVANT;ADJUVANT		Positive	Not Available	Positive	50-59%	Negative	2+	1.4	Alive	TUMOR FREE	0	4088	0	4088
TCGA-A2-A0EO-01A-11R-A034-07	Tumor	Yes	No	FEMALE	WHITE	54	Peri (6-12 months since last menstrual period)	Left	Core needle biopsy	Infiltrating Ductal Carcinoma	No	Lumpectomy	Sentinel node biopsy alone	Close	3	0	N0	T1	Stage IA	M0	YES	Not Available	Exemestane;Tamoxifen;E-75	Not Available;Not Available;Not Available	ADJUVANT;ADJUVANT;OTHER, SPECIFY IN NOTES		Positive	Not Available	Positive	Not Available	Negative	1+	1.6	Alive	TUMOR FREE	0	2442	0	2442
TCGA-A2-A0EP-01A-52R-A22U-07	Tumor	Yes	No	FEMALE	WHITE	56	Post (prior bilateral ovariectomy OR >12 mo since LMP with no prior hysterectomy)	Right Lower Inner Quadrant	Core needle biopsy	Infiltrating Lobular Carcinoma	No	Simple Mastectomy	Sentinel node biopsy alone	Negative	1	1	N0 (i+)	T1	Stage I	M0	NO;NO	NO	Cyclophosphamide;Adriamycin;Paclitaxel;Arimidex;Arimidex	Complete Response;Complete Response;Complete Response;Complete Response;Complete Response	Not Available;Not Available;Not Available;Not Available;Not Available		Positive	80-89%	Negative	Not Available	Negative	Not Available	1.3	Alive	TUMOR FREE	0	3603	0	3603
TCGA-A2-A0EQ-01A-11R-A034-07	Tumor	Yes	No	FEMALE	BLACK OR AFRICAN AMERICAN	64	Post (prior bilateral ovariectomy OR >12 mo since LMP with no prior hysterectomy)	Left	Core needle biopsy	Infiltrating Ductal Carcinoma	No	Lumpectomy	Other (specify)	Positive	2	0	N0	T2	Stage IIA	M0	YES	Not Available	Adriamycin;Herceptin;Cytoxan;Paclitaxel;AE-37	Not Available;Not Available;Not Available;Not Available;Not Available	ADJUVANT;ADJUVANT;ADJUVANT;ADJUVANT;OTHER, SPECIFY IN NOTES	Her-2	Negative	<10%	Negative	<10%	Positive	3+	1.1	Alive	TUMOR FREE	0	2426	0	2426
TCGA-A2-A0ER-01A-21R-A034-07	Tumor	Yes	No	FEMALE	WHITE	63	Post (prior bilateral ovariectomy OR >12 mo since LMP with no prior hysterectomy)	Right Lower Inner Quadrant	Core needle biopsy	Infiltrating Ductal Carcinoma	No	Lumpectomy	Sentinel lymph node biopsy plus axillary dissection	Positive	14	1	N1mi	T1c	Stage IB	M0	YES	Not Available	Docetaxel;Arimidex;Cytoxan;Adriamycin;E-75	Not Available;Not Available;Not Available;Not Available;Not Available	ADJUVANT;ADJUVANT;ADJUVANT;ADJUVANT;OTHER, SPECIFY IN NOTES		Positive	90-99%	Positive	80-89%	Negative	2+	1	Alive	TUMOR FREE	0	2263	0	2263
TCGA-A2-A0ES-01A-11R-A115-07	Tumor	Yes	No	FEMALE	WHITE	52	Post (prior bilateral ovariectomy OR >12 mo since LMP with no prior hysterectomy)	Left Upper Outer Quadrant	Core needle biopsy	Infiltrating Lobular Carcinoma	No	Simple Mastectomy	Sentinel node biopsy alone	Negative	1	0	N0 (i-)	T2	Stage IIA	M0	NO;NO	Not Available	Anastrozole;Docetaxel;Cytoxan;Exemestane	Not Available;Not Available;Not Available;Not Available	ADJUVANT;ADJUVANT;ADJUVANT;ADJUVANT		Positive	60-69%	Positive	10-19%	Negative	1+	1.32	Alive	TUMOR FREE	0	2190	0	2190
TCGA-A2-A0ET-01A-31R-A034-07	Tumor	Yes	No	FEMALE	WHITE	58	Post (prior bilateral ovariectomy OR >12 mo since LMP with no prior hysterectomy)	Right Upper Outer Quadrant	Core needle biopsy	Infiltrating Ductal Carcinoma	No	Lumpectomy	Axillary lymph node dissection alone	Negative	15	5	N2a	T2	Stage IIIA	M0	YES	Not Available	Cytoxan;Adriamycin;Anastrozole;Taxol	Not Available;Not Available;Not Available;Not Available	ADJUVANT;ADJUVANT;ADJUVANT;ADJUVANT		Positive	90-99%	Positive	70-79%	Negative	2+	1.09	Alive	TUMOR FREE	0	1066	0	1066
TCGA-A2-A0EU-01A-22R-A056-07	Tumor	Yes	No	FEMALE	WHITE	79	Post (prior bilateral ovariectomy OR >12 mo since LMP with no prior hysterectomy)	Right Lower Outer Quadrant	Core needle biopsy	Infiltrating Ductal Carcinoma	No	Lumpectomy	Sentinel node biopsy alone	Positive	1	0	N0 (i-)	T1c	Stage IA	M0	YES	Not Available					Positive	90-99%	Positive	90-99%	Negative	0	0.97	Alive	TUMOR FREE	0	1043	0	1043
TCGA-A2-A0EV-01A-11R-A034-07	Tumor	Yes	No	FEMALE	WHITE	80	Post (prior bilateral ovariectomy OR >12 mo since LMP with no prior hysterectomy)	Left	Core needle biopsy	Infiltrating Ductal Carcinoma	No	Lumpectomy	Sentinel node biopsy alone	Negative	6	0	N0 (i-)	T1c	Stage IA	M0	NO	Not Available					Positive	90-99%	Positive	90-99%	Negative	0	1.4	Alive	TUMOR FREE	0	968	0	968
TCGA-A2-A0EW-01A-21R-A115-07	Tumor	Yes	No	FEMALE	WHITE	53	Post (prior bilateral ovariectomy OR >12 mo since LMP with no prior hysterectomy)	Right Lower Outer Quadrant	Core needle biopsy	Infiltrating Lobular Carcinoma	No	Simple Mastectomy	Sentinel lymph node biopsy plus axillary dissection	Positive	Not Available	26	N3a	T1b	Stage IIIC	M0	NO;YES	Not Available	Arimidex;Adriamycin;Cytoxan;Taxol;Letrozole;Arimidex;Exemestane;Zoledronic Acid;Fulvestrant;Denosumab;Tamoxifen;Doxorubicin Liposome	Not Available;Not Available;Not Available;Not Available;Complete Response;Complete Response;Clinical Progressive Disease;Clinical Progressive Disease;Clinical Progressive Disease;Clinical Progressive Disease;Clinical Progressive Disease;Clinical Progressive Disease	ADJUVANT;ADJUVANT;ADJUVANT;ADJUVANT;Not Available;Not Available;Not Available;Not Available;Not Available;Not Available;Not Available;Not Available		Positive	90-99%	Positive	10-19%	Negative	0	1.33	Alive	WITH TUMOR	1	1884	1	1353	1353	1	Distant Metastasis	Bone
TCGA-A2-A0EX-01A-21R-A034-07	Tumor	Yes	No	FEMALE	WHITE	46	Post (prior bilateral ovariectomy OR >12 mo since LMP with no prior hysterectomy)	Left Upper Outer Quadrant	Core needle biopsy	Infiltrating Lobular Carcinoma	No	Lumpectomy	Sentinel node biopsy alone	Positive	1	1	N0 (i+)	T3	Stage IIB	M0	NO;NO	Not Available	Lupron;Tamoxifen;Zoladex	Not Available;Not Available;Not Available	ADJUVANT;ADJUVANT;ADJUVANT		Positive	60-69%	Positive	90-99%	Negative	1+	1.22	Alive	TUMOR FREE	0	752	0	752
TCGA-A2-A0EY-01A-11R-A034-07	Tumor	Yes	No	FEMALE	WHITE	62	Post (prior bilateral ovariectomy OR >12 mo since LMP with no prior hysterectomy)	Right Upper Outer Quadrant	Core needle biopsy	Infiltrating Ductal Carcinoma	No	Lumpectomy	Sentinel lymph node biopsy plus axillary dissection	Negative	23	1	N1a	T2	Stage IIB	M0	YES	Not Available	Adriamycin;Docetaxel;Lapatinib;Arimidex;Herceptin;Cytoxan	Not Available;Not Available;Not Available;Not Available;Not Available;Not Available	ADJUVANT;ADJUVANT;ADJUVANT;ADJUVANT;ADJUVANT;ADJUVANT	Her-2	Positive	60-69%	Negative	<10%	Positive	3+	7	Alive	TUMOR FREE	0	1925	0	1925
TCGA-A2-A0ST-01A-12R-A084-07	Tumor	Yes	No	FEMALE	WHITE	62	Post (prior bilateral ovariectomy OR >12 mo since LMP with no prior hysterectomy)	Right Upper Outer Quadrant	Excisional Biopsy	Infiltrating Ductal Carcinoma	No	Lumpectomy	Sentinel lymph node biopsy plus axillary dissection	Negative	9	3	N1a	T1c	Stage IIA	M0	YES	Not Available	Adriamycin;Taxol;Letrozole;Cytoxan;Anastrozole;Tamoxifen	Not Available;Not Available;Not Available;Not Available;Not Available;Not Available	ADJUVANT;ADJUVANT;ADJUVANT;ADJUVANT;ADJUVANT;ADJUVANT	TNBC	Negative	Not Available	Negative	Not Available	Negative	Not Available	1.3	Alive	WITH TUMOR	0	3017	0	3017
TCGA-A2-A0SU-01A-11R-A084-07	Tumor	Yes	No	FEMALE	WHITE	66	Post (prior bilateral ovariectomy OR >12 mo since LMP with no prior hysterectomy)	Left	Core needle biopsy	Infiltrating Ductal Carcinoma	No	Simple Mastectomy	Sentinel node biopsy alone	Negative	7	1	N0 (i+)	T2	Stage IIA	M0	NO	Not Available	Arimidex	Not Available	ADJUVANT		Positive	90-99%	Positive	<10%	Negative	1+	Not Available	Alive	TUMOR FREE	0	1662	0	1662
TCGA-A2-A0SV-01A-11R-A084-07	Tumor	Yes	No	FEMALE	WHITE	63	Post (prior bilateral ovariectomy OR >12 mo since LMP with no prior hysterectomy)	Right	Core needle biopsy	Infiltrating Ductal Carcinoma	No	Simple Mastectomy	Axillary lymph node dissection alone	Positive	9	8	N2a	T2	Stage IV	M1	YES	Not Available	Zometa;Arimidex;Fulvestrant;Xeloda	Not Available;Not Available;Not Available;Not Available	ADJUVANT;ADJUVANT;ADJUVANT;PROGRESSION		Positive	90-99%	Positive	10-19%	Negative	2+	1	Dead	WITH TUMOR	1	825	1	825
TCGA-A2-A0SW-01A-11R-A084-07	Tumor	Yes	No	FEMALE	WHITE	82	Post (prior bilateral ovariectomy OR >12 mo since LMP with no prior hysterectomy)	Right	Core needle biopsy	Infiltrating Ductal Carcinoma	No	Lumpectomy	Sentinel lymph node biopsy plus axillary dissection	Negative	15	4	N2	T2	Stage IV	M1	YES	Not Available	Arimidex;Tamoxifen	Not Available;Not Available	ADJUVANT;ADJUVANT		Positive	40-49%	Negative	<10%	Negative	Not Available	1.2	Dead	WITH TUMOR	1	1365	1	653	653	1
TCGA-A2-A0SX-01A-12R-A084-07	Tumor	Yes	No	FEMALE	WHITE	48	Pre (<6 months since LMP AND no prior bilateral ovariectomy AND not on estrogen replacement)	Left Upper Inner Quadrant	Core needle biopsy	Infiltrating Ductal Carcinoma	No	Lumpectomy	Sentinel node biopsy alone	Positive	1	0	N0 (i-)	T1c	Stage IA	M0	YES;YES	Not Available	Adriamycin;Cytoxan;Carboplatin;Gemcitabine;Xeloda	Not Available;Not Available;Not Available;Not Available;Not Available	ADJUVANT;ADJUVANT;RECURRENCE;RECURRENCE;PROGRESSION	TNBC	Negative	Not Available	Negative	Not Available	Negative	1+	Not Available	Alive	WITH TUMOR	0	1534	1	1239	1239	1
TCGA-A2-A0SY-01A-31R-A084-07	Tumor	Yes	No	FEMALE	WHITE	62	Post (prior bilateral ovariectomy OR >12 mo since LMP with no prior hysterectomy)	Left Upper Outer Quadrant	Core needle biopsy	Infiltrating Lobular Carcinoma	No	Modified Radical Mastectomy	Sentinel lymph node biopsy plus axillary dissection	Negative	14	1	N1	T3	Stage IIIA	M0	YES	Not Available	Taxotere;Herceptin;Arimidex;Cytoxan;Adriamycin	Not Available;Not Available;Not Available;Not Available;Not Available	ADJUVANT;ADJUVANT;ADJUVANT;ADJUVANT;ADJUVANT	Her-2	Positive	80-89%	Positive	40-49%	Positive	Not Available	4.8	Alive	TUMOR FREE	0	1347	0	1347
TCGA-A2-A0T0-01A-22R-A084-07	Tumor	Yes	No	FEMALE	WHITE	59	Post (prior bilateral ovariectomy OR >12 mo since LMP with no prior hysterectomy)	Left Lower Outer Quadrant	Core needle biopsy	Infiltrating Ductal Carcinoma	No	Lumpectomy	Axillary lymph node dissection alone	Negative	14	2	N1	T2	Stage IIB	M0	YES	Not Available	Taxotere;Cytoxan;Adriamycin	Not Available;Not Available;Not Available	ADJUVANT;ADJUVANT;ADJUVANT	TNBC	Negative	<10%	Negative	<10%	Negative	0	Not Available	Alive	TUMOR FREE	0	533	0	533
TCGA-A2-A0T1-01A-21R-A084-07	Tumor	Yes	No	FEMALE	AMERICAN INDIAN OR ALASKA NATIVE	55	Post (prior bilateral ovariectomy OR >12 mo since LMP with no prior hysterectomy)	Right Upper Outer Quadrant	Core needle biopsy	Infiltrating Ductal Carcinoma	No	Lumpectomy	Axillary lymph node dissection alone	Negative	10	10	N3	T3	Stage IIIC	M0	YES	Not Available	Herceptin;Carboplatin;Taxotere	Not Available;Not Available;Not Available	ADJUVANT;ADJUVANT;ADJUVANT	Her-2	Negative	<10%	Negative	<10%	Positive	3+	Not Available	Alive	TUMOR FREE	0	521	0	521
TCGA-A2-A0T2-01A-11R-A084-07	Tumor	Yes	No	FEMALE	WHITE	66	Post (prior bilateral ovariectomy OR >12 mo since LMP with no prior hysterectomy)	Right	Core needle biopsy	Infiltrating Ductal Carcinoma	No	Modified Radical Mastectomy	Axillary lymph node dissection alone	Close	14	10	N3	T3	Stage IV	M1	NO	Not Available	Xeloda	Not Available	ADJUVANT	TNBC	Negative	<10%	Negative	<10%	Negative	0	Not Available	Dead	WITH TUMOR	1	255	1	255
TCGA-A2-A0T3-01A-21R-A115-07	Tumor	Yes	No	FEMALE	WHITE	37	Pre (<6 months since LMP AND no prior bilateral ovariectomy AND not on estrogen replacement)	Right Upper Outer Quadrant	Core needle biopsy	Infiltrating Ductal Carcinoma	No	Lumpectomy	Sentinel lymph node biopsy plus axillary dissection	Positive	13	2	N1mi	T1c	Stage IB	M0	YES;YES	Not Available	Adriamycin;Tamoxifen;Cytoxan;Taxotere	Not Available;Not Available;Not Available;Not Available	ADJUVANT;ADJUVANT;ADJUVANT;ADJUVANT		Positive	90-99%	Positive	90-99%	Negative	2+	1.4	Alive	TUMOR FREE	0	1516	0	1516
TCGA-A2-A0T4-01A-31R-A084-07	Tumor	Yes	No	FEMALE	WHITE	62	Post (prior bilateral ovariectomy OR >12 mo since LMP with no prior hysterectomy)	Right Upper Inner Quadrant	Core needle biopsy	Infiltrating Lobular Carcinoma	No	Simple Mastectomy	Other (specify)	Negative	2	0	N0 (i-)	T2	Stage IIA	M0	NO	Not Available	Femara	Not Available	ADJUVANT		Positive	90-99%	Positive	60-69%	Negative	2+	1.1	Alive	TUMOR FREE	0	624	0	624
TCGA-A2-A0T5-01A-21R-A084-07	Tumor	Yes	No	FEMALE	WHITE	39	Pre (<6 months since LMP AND no prior bilateral ovariectomy AND not on estrogen replacement)	Left	Core needle biopsy	Infiltrating Ductal Carcinoma	No	Simple Mastectomy	Sentinel node biopsy alone	Negative	4	0	N0 (i-)	T2	Stage IIA	M0	NO	Not Available	Taxotere;Cytoxan;Tamoxifen	Not Available;Not Available;Not Available	ADJUVANT;ADJUVANT;ADJUVANT		Positive	90-99%	Positive	90-99%	Negative	1+	1.3	Alive	TUMOR FREE	0	531	0	531
TCGA-A2-A0T6-01A-11R-A084-07	Tumor	Yes	No	FEMALE	WHITE	50	Pre (<6 months since LMP AND no prior bilateral ovariectomy AND not on estrogen replacement)	Left	Core needle biopsy	Infiltrating Lobular Carcinoma	No	Simple Mastectomy	Sentinel node biopsy alone	Negative	3	0	N0 (i-)	T3	Stage IIB	M0	YES	Not Available	Tamoxifen;Adriamycin;Taxotere;Cytoxan	Not Available;Not Available;Not Available;Not Available	ADJUVANT;ADJUVANT;ADJUVANT;ADJUVANT		Positive	90-99%	Positive	90-99%	Negative	1+	Not Available	Alive	TUMOR FREE	0	575	0	575
TCGA-A2-A0T7-01A-21R-A084-07	Tumor	Yes	No	FEMALE	WHITE	51	Pre (<6 months since LMP AND no prior bilateral ovariectomy AND not on estrogen replacement)	Right Upper Inner Quadrant	Core needle biopsy	Infiltrating Ductal Carcinoma	No	Modified Radical Mastectomy	Sentinel node biopsy alone	Positive	2	1	N0 (i+)	T2	Stage IIA	M0	NO	Not Available	Adriamycin;Taxol;Tamoxifen;Cytoxan	Not Available;Not Available;Not Available;Not Available	ADJUVANT;ADJUVANT;ADJUVANT;ADJUVANT		Positive	90-99%	Positive	70-79%	Negative	1+	Not Available	Alive	TUMOR FREE	0	631	0	631
TCGA-A2-A0YC-01A-11R-A109-07	Tumor	Yes	No	FEMALE	WHITE	59	Post (prior bilateral ovariectomy OR >12 mo since LMP with no prior hysterectomy)	Right Upper Inner Quadrant	Core needle biopsy	Infiltrating Ductal Carcinoma	No	Lumpectomy	Other (specify)	Close	3	1	N1mi	T2	Stage IIB	M0	YES;YES	Not Available	Arimidex	Not Available	ADJUVANT		Positive	90-99%	Positive	90-99%	Negative	Not Available	1.18	Alive	WITH TUMOR	0	990	1	756	756	1	Locoregional Disease;Distant Metastasis	Bone
TCGA-A2-A0YD-01A-11R-A109-07	Tumor	Yes	No	FEMALE	WHITE	63	Post (prior bilateral ovariectomy OR >12 mo since LMP with no prior hysterectomy)	Left Upper Outer Quadrant	Core needle biopsy	Infiltrating Lobular Carcinoma	No	Simple Mastectomy	Sentinel node biopsy alone	Negative	2	1	N0 (i+)	T3	Stage IIB	M0	NO	Not Available	Cytoxan;Adriamycin;Arimidex	Not Available;Not Available;Not Available	ADJUVANT;ADJUVANT;ADJUVANT		Positive	90-99%	Positive	80-89%	Negative	Not Available	1.04	Alive	TUMOR FREE	0	769	0	769
TCGA-A2-A0YE-01A-11R-A109-07	Tumor	Yes	No	FEMALE	WHITE	48	Post (prior bilateral ovariectomy OR >12 mo since LMP with no prior hysterectomy)	Right Upper Outer Quadrant	Core needle biopsy	Infiltrating Ductal Carcinoma	No	Lumpectomy	Sentinel lymph node biopsy plus axillary dissection	Negative	19	1	N1a	T2	Stage IIB	M0	YES	Not Available	Taxotere;Adriamycin;Cytoxan	Not Available;Not Available;Not Available	ADJUVANT;ADJUVANT;ADJUVANT	TNBC	Negative	<10%	Negative	<10%	Negative	0	Not Available	Alive	TUMOR FREE	0	554	0	554
TCGA-A2-A0YF-01A-21R-A109-07	Tumor	Yes	No	FEMALE	BLACK OR AFRICAN AMERICAN	67	Post (prior bilateral ovariectomy OR >12 mo since LMP with no prior hysterectomy)	Right	Core needle biopsy	Infiltrating Ductal Carcinoma	No	Simple Mastectomy	Sentinel node biopsy alone	Negative	1	1	N0 (i+)	T1b	Stage I	M0	NO;NO	Not Available	Arimidex	Not Available	ADJUVANT		Positive	90-99%	Negative	<10%	Negative	0	Not Available	Alive	TUMOR FREE	0	1535	0	1535
TCGA-A2-A0YG-01A-21R-A109-07	Tumor	Yes	No	FEMALE	WHITE	63	Post (prior bilateral ovariectomy OR >12 mo since LMP with no prior hysterectomy)	Left Upper Outer Quadrant	Core needle biopsy	Infiltrating Ductal Carcinoma	No	Lumpectomy	Axillary lymph node dissection alone	Negative	18	14	N3a	T2	Stage IIIC	M0	YES	Not Available	Taxotere;Taxol;Cytoxan;Adriamycin;Arimidex;Herceptin	Not Available;Not Available;Not Available;Not Available;Not Available;Not Available	ADJUVANT;ADJUVANT;ADJUVANT;ADJUVANT;ADJUVANT;ADJUVANT	Her-2	Positive	90-99%	Positive	<10%	Positive	3+	Not Available	Alive	TUMOR FREE	0	666	0	666
TCGA-A2-A0YH-01A-11R-A109-07	Tumor	Yes	No	FEMALE	WHITE	53	Post (prior bilateral ovariectomy OR >12 mo since LMP with no prior hysterectomy)	Left Lower Outer Quadrant	Core needle biopsy	Infiltrating Ductal Carcinoma	No	Lumpectomy	Axillary lymph node dissection alone	Negative	28	5	N2a	T2	Stage IIIA	M0	YES	Not Available	Taxotere;Cytoxan;Arimidex;Adriamycin	Not Available;Not Available;Not Available;Not Available	ADJUVANT;ADJUVANT;ADJUVANT;ADJUVANT		Positive	80-89%	Positive	70-79%	Negative	0	Not Available	Alive	TUMOR FREE	0	659	0	659
TCGA-A2-A0YI-01A-31R-A10J-07	Tumor	Yes	No	FEMALE	WHITE	62	Post (prior bilateral ovariectomy OR >12 mo since LMP with no prior hysterectomy)	Right Upper Outer Quadrant	Core needle biopsy	Infiltrating Ductal Carcinoma	No	Lumpectomy	Other (specify)	Negative	3	1	N0 (i+)	T1c	Stage I	M0	YES;YES	Not Available	Femara	Not Available	ADJUVANT		Positive	90-99%	Positive	60-69%	Negative	1+	Not Available	Alive	TUMOR FREE	0	1505	0	1505
TCGA-A2-A0YJ-01A-11R-A109-07	Tumor	Yes	No	FEMALE	WHITE	39	Pre (<6 months since LMP AND no prior bilateral ovariectomy AND not on estrogen replacement)	Left	Core needle biopsy	Infiltrating Ductal Carcinoma	No	Modified Radical Mastectomy	Axillary lymph node dissection alone	Negative	18	5	N2a	T3	Stage IIIA	M0	YES	Not Available	Cytoxan;Taxotere	Not Available;Not Available	ADJUVANT;ADJUVANT		Positive	<10%	Negative	<10%	Negative	0	Not Available	Alive	WITH TUMOR	0	566	1	559	559	1	Distant Metastasis	Other, specify
TCGA-A2-A0YK-01A-22R-A109-07	Tumor	Yes	No	FEMALE	WHITE	61	Post (prior bilateral ovariectomy OR >12 mo since LMP with no prior hysterectomy)	Left Upper Inner Quadrant;Left Upper Outer Quadrant;Left Lower Inner Quadrant;Left Lower Outer Quadrant	Core needle biopsy	Infiltrating Lobular Carcinoma	No	Simple Mastectomy	Sentinel node biopsy alone	Close	3	0	N0 (i-)	T2	Stage IIA	M0	NO	Not Available	Arimidex;Cytoxan;Taxotere	Not Available;Not Available;Not Available	ADJUVANT;ADJUVANT;ADJUVANT		Positive	90-99%	Negative	<10%	Negative	1+	Not Available	Alive	TUMOR FREE	0	588	0	588
TCGA-A2-A0YL-01A-21R-A109-07	Tumor	Yes	No	FEMALE	WHITE	48	Pre (<6 months since LMP AND no prior bilateral ovariectomy AND not on estrogen replacement)	Left Upper Inner Quadrant;Left Upper Outer Quadrant;Left Lower Inner Quadrant;Left Lower Outer Quadrant	Core needle biopsy	Infiltrating Lobular Carcinoma	No	Simple Mastectomy	Sentinel lymph node biopsy plus axillary dissection	Negative	29	4	N2a	T3	Stage IIIA	M0	YES;YES	Not Available	Cytoxan;Taxotere;Adriamycin;Arimidex	Not Available;Not Available;Not Available;Not Available	ADJUVANT;ADJUVANT;ADJUVANT;ADJUVANT		Positive	70-79%	Positive	90-99%	Negative	1+	Not Available	Alive	TUMOR FREE	0	1474	0	1474
TCGA-A2-A0YM-01A-11R-A109-07	Tumor	Yes	No	FEMALE	WHITE	67	Post (prior bilateral ovariectomy OR >12 mo since LMP with no prior hysterectomy)	Left Upper Outer Quadrant	Core needle biopsy	Infiltrating Ductal Carcinoma	No	Lumpectomy	Other (specify)	Negative	5	0	N0 (i-)	T2	Stage IIA	M0	YES	Not Available				TNBC	Negative	<10%	Negative	<10%	Negative	Not Available	1.08	Alive	TUMOR FREE	0	965	0	965
TCGA-A2-A0YT-01A-11R-A109-07	Tumor	No	No	FEMALE	WHITE	56	Post (prior bilateral ovariectomy OR >12 mo since LMP with no prior hysterectomy)	Left Upper Outer Quadrant	Core needle biopsy	Infiltrating Ductal Carcinoma	Yes	Modified Radical Mastectomy	Axillary lymph node dissection alone	Negative	5	5	N2a	T4b	Stage IIIB	M0	YES	Not Available	Arimidex	Not Available	ADJUVANT		Positive	90-99%	Negative	<10%	Negative	Not Available	1.3	Dead	TUMOR FREE	1	723	0	723
TCGA-A2-A1FV-01A-11R-A13Q-07	Tumor	Yes	No	FEMALE	WHITE	74	Post (prior bilateral ovariectomy OR >12 mo since LMP with no prior hysterectomy)	Left	Core needle biopsy	Infiltrating Lobular Carcinoma	No	Simple Mastectomy	Sentinel node biopsy alone	Negative	2	1	N0 (i+)	T3	Stage IIB	M0	YES	Not Available	Cyclophosphamide;Arimidex;Docetaxel	Not Available;Not Available;Not Available	ADJUVANT;ADJUVANT;ADJUVANT		Positive	90-99%	Positive	<10%	Negative	1+	0.92	Alive	TUMOR FREE	0	714	0	714
TCGA-A2-A1FW-01A-11R-A13Q-07	Tumor	Yes	No	FEMALE	WHITE	62	Post (prior bilateral ovariectomy OR >12 mo since LMP with no prior hysterectomy)	Right Upper Outer Quadrant	Core needle biopsy	Infiltrating Ductal Carcinoma	No	Modified Radical Mastectomy	Sentinel lymph node biopsy plus axillary dissection	Negative	19	5	N2a	T3	Stage IIIA	M0	YES	Not Available	Cytoxan;Adriamycin;Taxotere;Femara	Not Available;Not Available;Not Available;Not Available	ADJUVANT;ADJUVANT;ADJUVANT;ADJUVANT		Positive	90-99%	Negative	Not Available	Negative	Not Available	Not Available	Alive	TUMOR FREE	0	528	0	528
TCGA-A2-A1FX-01A-11R-A13Q-07	Tumor	Yes	No	FEMALE	WHITE	61	Post (prior bilateral ovariectomy OR >12 mo since LMP with no prior hysterectomy)	Right Upper Outer Quadrant	Core needle biopsy	Infiltrating Ductal Carcinoma	No	Lumpectomy	Sentinel lymph node biopsy plus axillary dissection	Positive	24	6	N2a	T3	Stage IIIA	M0	YES;YES	Not Available	Taxotere;Arimidex;Cytoxan	Not Available;Not Available;Not Available	ADJUVANT;ADJUVANT;ADJUVANT		Positive	70-79%	Positive	60-69%	Negative	Not Available	1.1	Alive	TUMOR FREE	0	1847	0	1847
TCGA-A2-A1FZ-01A-51R-A14D-07	Tumor	Yes	No	FEMALE	WHITE	63	Post (prior bilateral ovariectomy OR >12 mo since LMP with no prior hysterectomy)	Right	Core needle biopsy	Infiltrating Ductal Carcinoma	No	Simple Mastectomy	Sentinel node biopsy alone	Negative	3	0	N0 (i-)	T2	Stage IIA	M0	NO	Not Available	Arimidex	Not Available	ADJUVANT		Positive	90-99%	Positive	90-99%	Negative	Not Available	Not Available	Alive	TUMOR FREE	0	683	0	683
TCGA-A2-A1G0-01A-11R-A13Q-07	Tumor	Yes	No	FEMALE	WHITE	49	Pre (<6 months since LMP AND no prior bilateral ovariectomy AND not on estrogen replacement)	Left Upper Inner Quadrant	Core needle biopsy	Other, specify	No	Simple Mastectomy	Sentinel lymph node biopsy plus axillary dissection	Negative	19	2	N1a	T2	Stage IIB	M0	YES	Not Available	Adriamycin;Taxotere;Cytoxan;Tamoxifen	Not Available;Not Available;Not Available;Not Available	ADJUVANT;ADJUVANT;ADJUVANT;ADJUVANT		Positive	90-99%	Positive	90-99%	Negative	2+	1.2	Alive	TUMOR FREE	0	616	0	616
TCGA-A2-A1G1-01A-21R-A13Q-07	Tumor	Yes	No	FEMALE	WHITE	85	Post (prior bilateral ovariectomy OR >12 mo since LMP with no prior hysterectomy)	Right Upper Outer Quadrant	Core needle biopsy	Infiltrating Ductal Carcinoma	No	Lumpectomy	Sentinel lymph node biopsy plus axillary dissection	Negative	13	1	N1	T2	Stage IIB	M0	YES	Not Available				Her-2	Negative	Not Available	Negative	Not Available	Positive	2+	16.3	Alive	TUMOR FREE	0	584	0	584
TCGA-A2-A1G4-01A-11R-A13Q-07	Tumor	Yes	No	FEMALE	WHITE	71	Post (prior bilateral ovariectomy OR >12 mo since LMP with no prior hysterectomy)	Right Lower Outer Quadrant	Core needle biopsy	Infiltrating Ductal Carcinoma	No	Modified Radical Mastectomy	Axillary lymph node dissection alone	Negative	15	2	N1a	T3	Stage IIIA	M0	NO	Not Available	Adriamycin;Femara;Cytoxan;Taxotere	Not Available;Not Available;Not Available;Not Available	ADJUVANT;ADJUVANT;ADJUVANT;ADJUVANT		Positive	90-99%	Positive	90-99%	Negative	Not Available	Not Available	Alive	TUMOR FREE	0	595	0	595
TCGA-A2-A1G6-01A-11R-A13Q-07	Tumor	Yes	No	FEMALE	WHITE	50	Pre (<6 months since LMP AND no prior bilateral ovariectomy AND not on estrogen replacement)	Right	Core needle biopsy	Infiltrating Ductal Carcinoma	No	Modified Radical Mastectomy	Axillary lymph node dissection alone	Negative	9	4	N2a	T2	Stage IIIA	M0	YES	Not Available	Docetaxel;Adriamycin;Cytoxan	Not Available;Not Available;Not Available	ADJUVANT;ADJUVANT;ADJUVANT	TNBC	Negative	Not Available	Negative	Not Available	Negative	1+	Not Available	Alive	TUMOR FREE	0	501	0	501
TCGA-A2-A259-01A-11R-A16F-07	Tumor	Yes	No	FEMALE	BLACK OR AFRICAN AMERICAN	70	Post (prior bilateral ovariectomy OR >12 mo since LMP with no prior hysterectomy)	Left	Core needle biopsy	Infiltrating Ductal Carcinoma	No	Lumpectomy	Sentinel node biopsy alone	Close	2	0	N0 (i-)	T1c	Stage I	M0	NO	Not Available	Arimidex	Not Available	ADJUVANT		Positive	90-99%	Positive	80-89%	Negative	Not Available	1.1	Alive	TUMOR FREE	0	1596	0	1596
TCGA-A2-A25A-01A-12R-A16F-07	Tumor	Yes	No	FEMALE	WHITE	44	Pre (<6 months since LMP AND no prior bilateral ovariectomy AND not on estrogen replacement)	Left Upper Inner Quadrant	Core needle biopsy	Infiltrating Lobular Carcinoma	No	Simple Mastectomy	Axillary lymph node dissection alone	Negative	14	0	N0 (i-)	T2	Stage IIA	M0	YES	Not Available	Cytoxan;Femara;Adriamycin;Taxol	Not Available;Not Available;Not Available;Not Available	ADJUVANT;ADJUVANT;ADJUVANT;ADJUVANT		Positive	<10%	Positive	<10%	Negative	2+	1.1	Alive	TUMOR FREE	0	3276	0	3276
TCGA-A2-A25B-01A-11R-A169-07	Tumor	Yes	No	FEMALE	BLACK OR AFRICAN AMERICAN	39	Pre (<6 months since LMP AND no prior bilateral ovariectomy AND not on estrogen replacement)	Left Upper Outer Quadrant	Core needle biopsy	Infiltrating Ductal Carcinoma	No	Simple Mastectomy	Sentinel lymph node biopsy plus axillary dissection	Close	8	2	N1	T2	Stage IIB	M0	YES;YES	Not Available	Taxotere;Cytoxan;Adriamycin;Tamoxifen	Not Available;Not Available;Not Available;Not Available	ADJUVANT;ADJUVANT;ADJUVANT;ADJUVANT		Positive	90-99%	Positive	10-19%	Negative	2+	0.93	Alive	WITH TUMOR	0	1291	1	1290	1290	1	Distant Metastasis	Bone
TCGA-A2-A25C-01A-11R-A169-07	Tumor	Yes	No	FEMALE	WHITE	50	Pre (<6 months since LMP AND no prior bilateral ovariectomy AND not on estrogen replacement)	Left Lower Outer Quadrant	Core needle biopsy	Infiltrating Ductal Carcinoma	No	Simple Mastectomy	Sentinel lymph node biopsy plus axillary dissection	Negative	14	3	N1a	T2	Stage IIB	M0	YES	Not Available	Taxotere;Adriamycin;Cytoxan;Tamoxifen;Aromasin;Femara	Not Available;Not Available;Not Available;Not Available;Not Available;Not Available	ADJUVANT;ADJUVANT;ADJUVANT;ADJUVANT;ADJUVANT;ADJUVANT		Positive	90-99%	Positive	20-29%	Negative	1+	Not Available	Alive	TUMOR FREE	0	523	0	523
TCGA-A2-A25D-01A-12R-A16F-07	Tumor	Yes	No	FEMALE	WHITE	90	Post (prior bilateral ovariectomy OR >12 mo since LMP with no prior hysterectomy)	Right Upper Outer Quadrant	Core needle biopsy	Infiltrating Lobular Carcinoma	No	Lumpectomy	Axillary lymph node dissection alone	Positive	24	22	N3a	T2	Stage IIIC	M0	YES	Not Available	Tamoxifen;Exemestane;Arimidex	Not Available;Not Available;Not Available	ADJUVANT;ADJUVANT;ADJUVANT		Positive	70-79%	Negative	Not Available	Negative	1+	1.22	Alive	TUMOR FREE	0	552	0	552
TCGA-A2-A25E-01A-11R-A169-07	Tumor	Yes	No	FEMALE	BLACK OR AFRICAN AMERICAN	34	Pre (<6 months since LMP AND no prior bilateral ovariectomy AND not on estrogen replacement)	Left Upper Outer Quadrant	Excisional Biopsy	Infiltrating Ductal Carcinoma	No	Modified Radical Mastectomy	Axillary lymph node dissection alone	Negative	10	6	N2a	T2	Stage IIIA	M0	YES;YES	Not Available	Cytoxan;Adriamycin;Herceptin;Taxol;Goserelin;Tamoxifen;Anastrozole	Not Available;Not Available;Not Available;Not Available;Not Available;Not Available;Not Applicable	ADJUVANT;ADJUVANT;ADJUVANT;ADJUVANT;OTHER, SPECIFY IN NOTES;ADJUVANT;Not Available	Her-2	Positive	80-89%	Positive	60-69%	Positive	2+	2.1	Alive	TUMOR FREE	0	3204	1	2989	2989	1	Locoregional Recurrence	Other, specify
TCGA-A2-A25F-01A-11R-A169-07	Tumor	Yes	No	FEMALE	WHITE	66	Post (prior bilateral ovariectomy OR >12 mo since LMP with no prior hysterectomy)	Right Upper Outer Quadrant	Core needle biopsy	Infiltrating Ductal Carcinoma	No	Lumpectomy	Sentinel node biopsy alone	Negative	2	0	N0 (i-)	T2	Stage IIA	M0	YES	Not Available	Taxotere;Cytoxan	Not Available;Not Available	ADJUVANT;ADJUVANT		Negative	Not Available	Positive	<10%	Negative	Not Available	Not Available	Alive	TUMOR FREE	0	322	0	322
TCGA-A2-A3KC-01A-11R-A213-07	Tumor	Yes	No	FEMALE	BLACK OR AFRICAN AMERICAN	55	Pre (<6 months since LMP AND no prior bilateral ovariectomy AND not on estrogen replacement)	Right Lower Outer Quadrant	Core needle biopsy	Infiltrating Lobular Carcinoma	No	Simple Mastectomy	Sentinel lymph node biopsy plus axillary dissection	Negative	19	2	N1a	T2	Stage IIB	M0	YES;YES	Not Available	Adriamycin;Cytoxan;Tamoxifen;Taxotere;Arimidex	Not Available;Not Available;Not Available;Not Available;Not Applicable	ADJUVANT;ADJUVANT;ADJUVANT;ADJUVANT;Not Available		Positive	90-99%	Positive	90-99%	Negative	2+	1	Alive	TUMOR FREE	0	1102	0	1102
TCGA-A2-A3KD-01A-12R-A213-07	Tumor	Yes	No	FEMALE	WHITE	47	Pre (<6 months since LMP AND no prior bilateral ovariectomy AND not on estrogen replacement)	Right Upper Outer Quadrant	Core needle biopsy	Mucinous Carcinoma	No	Lumpectomy	Sentinel lymph node biopsy plus axillary dissection	Positive	19	1	N1mi	T3	Stage IIIA	M0	YES	Not Available	Taxotere;Cytoxan;Tamoxifen	Not Available;Not Available;Not Available	ADJUVANT;ADJUVANT;ADJUVANT		Positive	90-99%	Positive	70-79%	Negative	1+	1.2	Alive	TUMOR FREE	0	1206	0	1206
TCGA-A2-A3XS-01A-11R-A22U-07	Tumor	Yes	No	FEMALE	BLACK OR AFRICAN AMERICAN	62	Post (prior bilateral ovariectomy OR >12 mo since LMP with no prior hysterectomy)	Left Upper Outer Quadrant	Core needle biopsy	Infiltrating Ductal Carcinoma	No	Lumpectomy	Sentinel lymph node biopsy plus axillary dissection	Positive	19	9	N2a	T1	Stage IIIA	M0	NO	Not Available	Cytoxan;Adriamycin;Paclitaxel;Tamoxifen;Docetaxel;Avastin;Xeloda;Navelbine	Complete Response;Complete Response;Complete Response;Clinical Progressive Disease;Clinical Progressive Disease;Clinical Progressive Disease;Clinical Progressive Disease;Clinical Progressive Disease	Not Available;Not Available;Not Available;Not Available;Not Available;Not Available;Not Available;Not Available	TNBC	Negative	Not Available	Negative	Not Available	Negative	Not Available	1.3	Dead	WITH TUMOR	1	1032	1	682	682	1	Distant Metastasis	Lung
TCGA-A2-A3XT-01A-11R-A22U-07	Tumor	Yes	No	FEMALE	BLACK OR AFRICAN AMERICAN	45	Pre (<6 months since LMP AND no prior bilateral ovariectomy AND not on estrogen replacement)	Left	Excisional Biopsy	Infiltrating Ductal Carcinoma	No	Modified Radical Mastectomy	Other (specify)	Negative	13	1	N1a	T2	Stage IIB	M0	YES;YES	YES	Cyclophosphamide;Doxorubicin;Docetaxel	Partial Response;Partial Response;Partial Response	Not Available;Not Available;Not Available	TNBC	Negative	Not Available	Negative	Not Available	Negative	Not Available	1.13	Alive	TUMOR FREE	0	2770	0	2770
TCGA-A2-A3XU-01A-12R-A22U-07	Tumor	Yes	No	FEMALE	BLACK OR AFRICAN AMERICAN	35	Post (prior bilateral ovariectomy OR >12 mo since LMP with no prior hysterectomy)	Left	Excisional Biopsy	Infiltrating Ductal Carcinoma	No	Lumpectomy	Sentinel lymph node biopsy plus axillary dissection	Negative	12	3	N1mi	T2	Stage IIB	M0	YES	YES	Adriamycin;Cytoxan;Taxotere;Arimidex;Xeloda	Unknown;Unknown;Unknown;Clinical Progressive Disease;Clinical Progressive Disease	Not Available;Not Available;Not Available;Not Available;Not Available	TNBC	Negative	Not Available	Negative	Not Available	Negative	Not Available	1.1	Dead	WITH TUMOR	1	912	1	574	574	1	Locoregional Recurrence;Distant Metastasis	Other, specify;Bone
TCGA-A2-A3XV-01A-21R-A239-07	Tumor	Yes	No	FEMALE	BLACK OR AFRICAN AMERICAN	46	Pre (<6 months since LMP AND no prior bilateral ovariectomy AND not on estrogen replacement)	Right	Core needle biopsy	Infiltrating Ductal Carcinoma	No	Lumpectomy	Sentinel node biopsy alone	Negative	4	0	N0	T2	Stage IIA	M0	YES;YES	YES	Carboplatin;Docetaxel;Trastuzumab;Tamoxifen	Complete Response;Complete Response;Complete Response;Not Applicable	Not Available;Not Available;Not Available;Not Available	Her-2	Positive	<10%	Negative	Not Available	Positive	2+	2.6	Alive	TUMOR FREE	0	996	0	996
TCGA-A2-A3XW-01A-11R-A239-07	Tumor	Yes	No	FEMALE	BLACK OR AFRICAN AMERICAN	42	Pre (<6 months since LMP AND no prior bilateral ovariectomy AND not on estrogen replacement)	Right	Core needle biopsy	Infiltrating Ductal Carcinoma	No	Simple Mastectomy	Sentinel lymph node biopsy plus axillary dissection	Negative	18	3	N1a	T2	Stage IIB	M0	YES;YES	Not Available	Adriamyicin;Cyclophosphamide;Taxol;Tamoxifen	Complete Response;Complete Response;Complete Response;Not Applicable	Not Available;Not Available;Not Available;Not Available		Positive	90-99%	Negative	Not Available	Negative	Not Available	1.31	Alive	TUMOR FREE	0	1712	0	1712
TCGA-A2-A3XX-01A-21R-A239-07	Tumor	Yes	No	FEMALE	BLACK OR AFRICAN AMERICAN	49	Post (prior bilateral ovariectomy OR >12 mo since LMP with no prior hysterectomy)	Left Lower Outer Quadrant	Core needle biopsy	Infiltrating Ductal Carcinoma	No	Simple Mastectomy	Sentinel node biopsy alone	Negative	1	0	N0	T2	Stage IIA	M0	NO	Not Available	Cyclophosphamide;Adriamycin;Paclitaxel	Complete Response;Complete Response;Complete Response	Not Available;Not Available;Not Available	TNBC	Negative	Not Available	Negative	Not Available	Negative	1+	1.25	Alive	TUMOR FREE	1	1439	0	1439
TCGA-A2-A3XY-01A-11R-A239-07	Tumor	Yes	No	FEMALE	BLACK OR AFRICAN AMERICAN	49	Post (prior bilateral ovariectomy OR >12 mo since LMP with no prior hysterectomy)	Left Upper Outer Quadrant	Core needle biopsy	Infiltrating Ductal Carcinoma	No	Modified Radical Mastectomy	Axillary lymph node dissection alone	Negative	16	3	N1a	T2	Stage IIB	M0	YES;YES	Not Available	Adriamycin;Cyclophosphamide;Adriamycin;Cyclophosphamide;Paclitaxel;Carboplatin;Gemcitabine;Docetaxel;Denosumab	Complete Response;Complete Response;Complete Response;Complete Response;Complete Response;Clinical Progressive Disease;Clinical Progressive Disease;Clinical Progressive Disease;Clinical Progressive Disease	Not Available;Not Available;Not Available;Not Available;Not Available;Not Available;Not Available;Not Available;Not Available	TNBC	Negative	Not Available	Negative	Not Available	Negative	Not Available	1.13	Alive	WITH TUMOR	1	1093	1	802	802	1	Distant Metastasis;Locoregional Recurrence	Lung;Other, specify;Brain
TCGA-A2-A3XZ-01A-42R-A239-07	Tumor	Yes	No	FEMALE	BLACK OR AFRICAN AMERICAN	46	Pre (<6 months since LMP AND no prior bilateral ovariectomy AND not on estrogen replacement)	Left Upper Inner Quadrant;Left Upper Outer Quadrant	Core needle biopsy	Infiltrating Ductal Carcinoma	No	Simple Mastectomy	Sentinel node biopsy alone	Negative	3	0	N0	T1c	Stage I	M0	NO;NO	NO	Carboplatin;Docetaxel;Trastuzumab	Complete Response;Complete Response;Complete Response	Not Available;Not Available;Not Available	Her-2	Negative	Not Available	Negative	Not Available	Positive	3+	Not Available	Alive	TUMOR FREE	0	1532	0	1532
TCGA-A2-A3Y0-01A-11R-A239-07	Tumor	Yes	No	FEMALE	BLACK OR AFRICAN AMERICAN	57	Post (prior bilateral ovariectomy OR >12 mo since LMP with no prior hysterectomy)	Left Upper Outer Quadrant	Core needle biopsy	Infiltrating Ductal Carcinoma	No	Modified Radical Mastectomy	Axillary lymph node dissection alone	Close	39	1	N1a	T2	Stage IIB	M0	NO;NO	NO	Adriamycin;Cytoxan;Docetaxel;Arimidex;Femara;Tamoxifen	Complete Response;Complete Response;Complete Response;Complete Response;Complete Response;Not Applicable	Not Available;Not Available;Not Available;Not Available;Not Available;Not Available		Positive	90-99%	Negative	Not Available	Negative	1+	Not Available	Alive	TUMOR FREE	0	1546	0	1546
TCGA-A2-A4RW-01A-21R-A266-07	Tumor	Yes	No	FEMALE	WHITE	49	Pre (<6 months since LMP AND no prior bilateral ovariectomy AND not on estrogen replacement)	Right;Right Upper Outer Quadrant	Core needle biopsy	Infiltrating Lobular Carcinoma	No	Modified Radical Mastectomy	Axillary lymph node dissection alone	Negative	27	27	N3a	T2	Stage IIIC	M0	Unknown	Unknown					Positive	80-89%	Positive	90-99%	Negative	1+	Not Available	Alive	TUMOR FREE	0	222	0	222
TCGA-A2-A4RX-01A-11R-A266-07	Tumor	Yes	No	FEMALE	BLACK OR AFRICAN AMERICAN	67	Post (prior bilateral ovariectomy OR >12 mo since LMP with no prior hysterectomy)	Right Lower Outer Quadrant	Core needle biopsy	Metaplastic Carcinoma	No	Simple Mastectomy	Sentinel node biopsy alone	Negative	3	0	N0	T2	Stage IIA	M0	Unknown	Unknown					Positive	<10%	Positive	<10%	Negative	1+	Not Available	Alive	TUMOR FREE	0	742	0	742
TCGA-A2-A4RY-01A-31R-A266-07	Tumor	Yes	No	FEMALE	WHITE	46	Pre (<6 months since LMP AND no prior bilateral ovariectomy AND not on estrogen replacement)	Right	Core needle biopsy	Infiltrating Lobular Carcinoma	No	Modified Radical Mastectomy	Axillary lymph node dissection alone	Negative	30	18	N3a	T3	Stage IIIC	M0	YES	YES	Taxotere;Adriamycin;Cytoxan;Tamoxifen	Complete Response;Complete Response;Complete Response;Not Applicable	Not Available;Not Available;Not Available;Not Available		Positive	90-99%	Positive	90-99%	Negative	1+	Not Available	Alive	TUMOR FREE	0	648	0	648
TCGA-A2-A4S0-01A-21R-A266-07	Tumor	Yes	No	FEMALE	WHITE	77	Post (prior bilateral ovariectomy OR >12 mo since LMP with no prior hysterectomy)	Right Upper Outer Quadrant	Core needle biopsy	Mucinous Carcinoma	No	Simple Mastectomy	Sentinel node biopsy alone	Negative	1	0	N0	T2	Stage IIA	M0	Unknown	NO					Positive	90-99%	Positive	90-99%	Negative	1+	Not Available	Alive	TUMOR FREE	0	706	0	706
TCGA-A2-A4S1-01A-21R-A266-07	Tumor	Yes	No	FEMALE	WHITE	66	Post (prior bilateral ovariectomy OR >12 mo since LMP with no prior hysterectomy)	Right Upper Outer Quadrant	Core needle biopsy	Metaplastic Carcinoma	No	Lumpectomy	Sentinel node biopsy alone	Negative	1	0	N0	T2	Stage IIA	M0	YES	YES					Positive	<10%	Negative	Not Available	Negative	Not Available	Not Available	Alive	TUMOR FREE	0	820	0	820
TCGA-A2-A4S2-01A-12R-A266-07	Tumor	Yes	No	FEMALE	WHITE	62	Post (prior bilateral ovariectomy OR >12 mo since LMP with no prior hysterectomy)	Right	Core needle biopsy	Infiltrating Lobular Carcinoma	No	Modified Radical Mastectomy	Axillary lymph node dissection alone	Negative	10	5	N2	T3	Stage IIIA	M0	YES	NO	Adriamycin;Cytoxan;Paclitaxel;Arimidex	Complete Response;Complete Response;Complete Response;Not Available	Not Available;Not Available;Not Available;Not Available		Positive	90-99%	Positive	90-99%	Negative	1+	Not Available	Alive	TUMOR FREE	0	643	0	643
TCGA-A2-A4S3-01A-21R-A266-07	Tumor	Yes	No	FEMALE	BLACK OR AFRICAN AMERICAN	59	Post (prior bilateral ovariectomy OR >12 mo since LMP with no prior hysterectomy)	Left Upper Outer Quadrant	Core needle biopsy	Infiltrating Ductal Carcinoma	No	Modified Radical Mastectomy	Axillary lymph node dissection alone	Negative	15	2	N1a	T2	Stage IIB	M0	Unknown	Unknown					Positive	90-99%	Positive	90-99%	Negative	Not Available	Not Available	Alive	TUMOR FREE	0	666	0	666
TCGA-A7-A0CD-01A-11R-A00Z-07	Tumor	Yes	No	FEMALE	WHITE	66	Post	Left	Core needle biopsy	Infiltrating Ductal Carcinoma	No	Lumpectomy	Sentinel node biopsy alone	Negative	2	0	N0	T1	Stage I	M0	YES;YES	Not Available	Arimidex	Not Available	ADJUVANT		Positive	90-99%	Positive	70-79%	Negative	2+	1.2	Alive	TUMOR FREE	0	1165	0	1165
TCGA-A7-A0CE-01A-11R-A00Z-07	Tumor	Yes	No	FEMALE	WHITE	57	Peri (6-12 months since last menstrual period)	Left	Core needle biopsy	Infiltrating Ductal Carcinoma	No	Lumpectomy	Sentinel lymph node biopsy plus axillary dissection	Negative	1	0	N0 (i-)	T2	Stage IIA	M0	YES;YES	Not Available	Adriamycin;Taxol;Cytoxan	Not Available;Not Available;Not Available	ADJUVANT;ADJUVANT;ADJUVANT	TNBC	Negative	<10%	Negative	<10%	Negative	2+	1.1	Alive	TUMOR FREE	0	1074	0	1074
TCGA-A7-A0CE-11A-21R-A089-07	Normal	Yes	No	FEMALE	WHITE	57	Peri (6-12 months since last menstrual period)	Left	Core needle biopsy	Infiltrating Ductal Carcinoma	No	Lumpectomy	Sentinel lymph node biopsy plus axillary dissection	Negative	1	0	N0 (i-)	T2	Stage IIA	M0	YES;YES	Not Available	Adriamycin;Taxol;Cytoxan	Not Available;Not Available;Not Available	ADJUVANT;ADJUVANT;ADJUVANT	TNBC	Negative	<10%	Negative	<10%	Negative	2+	1.1	Alive	TUMOR FREE	0	1074	0	1074
TCGA-A7-A0CG-01A-12R-A056-07	Tumor	Yes	No	FEMALE	WHITE	78	Post (prior bilateral ovariectomy OR >12 mo since LMP with no prior hysterectomy)	Right Upper Outer Quadrant;Right	Core needle biopsy	Mixed Histology (please specify)	No	Lumpectomy	Sentinel lymph node biopsy plus axillary dissection	Close	5	0	N0 (i-)	T2	Stage IIA	M0	YES;YES	Not Available					Positive	90-99%	Negative	<10%	Negative	1+	Not Available	Alive	TUMOR FREE	0	1043	0	1043
TCGA-A7-A0CH-01A-21R-A00Z-07	Tumor	Yes	No	FEMALE	WHITE	79	Post (prior bilateral ovariectomy OR >12 mo since LMP with no prior hysterectomy)	Left Upper Outer Quadrant;Left	Core needle biopsy	Infiltrating Ductal Carcinoma	No	Simple Mastectomy	Sentinel node biopsy alone	Negative	2	0	N0 (i-)	T2	Stage IIA	M0	NO;NO	Not Available	Arimidex	Not Available	ADJUVANT	TNBC	Negative	Not Available	Negative	Not Available	Negative	Not Available	Not Available	Alive	TUMOR FREE	0	1079	0	1079
TCGA-A7-A0CH-11A-32R-A089-07	Normal	Yes	No	FEMALE	WHITE	79	Post (prior bilateral ovariectomy OR >12 mo since LMP with no prior hysterectomy)	Left Upper Outer Quadrant;Left	Core needle biopsy	Infiltrating Ductal Carcinoma	No	Simple Mastectomy	Sentinel node biopsy alone	Negative	2	0	N0 (i-)	T2	Stage IIA	M0	NO;NO	Not Available	Arimidex	Not Available	ADJUVANT	TNBC	Negative	Not Available	Negative	Not Available	Negative	Not Available	Not Available	Alive	TUMOR FREE	0	1079	0	1079
TCGA-A7-A0CJ-01A-21R-A00Z-07	Tumor	Yes	No	FEMALE	WHITE	57	Post (prior bilateral ovariectomy OR >12 mo since LMP with no prior hysterectomy)	Left	Core needle biopsy	Infiltrating Ductal Carcinoma	No	Lumpectomy	Sentinel lymph node biopsy plus axillary dissection	Positive	1	0	N0 (i-)	T2	Stage IIA	M0	YES;YES	Not Available	Cytoxan;Taxotere;Arimidex	Not Available;Not Available;Not Available	ADJUVANT;ADJUVANT;ADJUVANT		Positive	90-99%	Positive	70-79%	Negative	1+	Not Available	Alive	TUMOR FREE	0	931	0	931
TCGA-A7-A0D9-01A-31R-A056-07	Tumor	Yes	No	FEMALE	WHITE	37	Pre (<6 months since LMP AND no prior bilateral ovariectomy AND not on estrogen replacement)	Left Upper Outer Quadrant;Left	Core needle biopsy	Infiltrating Ductal Carcinoma	No	Simple Mastectomy	Axillary lymph node dissection alone	Negative	1	0	N0 (i-)	T2	Stage IIA	M0	NO;NO	Not Available	Taxotere;Tamoxifen;Cytoxan	Not Available;Not Available;Not Available	ADJUVANT;ADJUVANT;ADJUVANT		Positive	90-99%	Negative	<10%	Negative	1+	Not Available	Alive	TUMOR FREE	0	1139	0	1139
TCGA-A7-A0D9-11A-53R-A089-07	Normal	Yes	No	FEMALE	WHITE	37	Pre (<6 months since LMP AND no prior bilateral ovariectomy AND not on estrogen replacement)	Left Upper Outer Quadrant;Left	Core needle biopsy	Infiltrating Ductal Carcinoma	No	Simple Mastectomy	Axillary lymph node dissection alone	Negative	1	0	N0 (i-)	T2	Stage IIA	M0	NO;NO	Not Available	Taxotere;Tamoxifen;Cytoxan	Not Available;Not Available;Not Available	ADJUVANT;ADJUVANT;ADJUVANT		Positive	90-99%	Negative	<10%	Negative	1+	Not Available	Alive	TUMOR FREE	0	1139	0	1139
TCGA-A7-A0DA-01A-31R-A115-07	Tumor	Yes	No	FEMALE	WHITE	62	Post (prior bilateral ovariectomy OR >12 mo since LMP with no prior hysterectomy)	Left Lower Outer Quadrant	Core needle biopsy	Infiltrating Ductal Carcinoma	No	Lumpectomy	Sentinel lymph node biopsy plus axillary dissection	Negative	1	0	N0 (i-)	T2	Stage IIA	M0	YES;YES	Not Available	Adriamycin;Cytoxan;Taxol	Not Available;Not Available;Not Available	ADJUVANT;ADJUVANT;ADJUVANT	TNBC	Negative	Not Available	Negative	Not Available	Negative	1+	Not Available	Alive	TUMOR FREE	0	1085	0	1085
TCGA-A7-A0DB-01A-11R-A00Z-07	Tumor	Yes	No	FEMALE	WHITE	56	Post (prior bilateral ovariectomy OR >12 mo since LMP with no prior hysterectomy)	Right	Core needle biopsy	Infiltrating Ductal Carcinoma	No	Simple Mastectomy	Sentinel lymph node biopsy plus axillary dissection	Close	4	0	N0 (i-)	T2	Stage IIA	M0	YES;YES	Not Available	Arimidex	Not Available	ADJUVANT		Positive	90-99%	Positive	60-69%	Negative	1+	Not Available	Alive	TUMOR FREE	0	1007	0	1007
TCGA-A7-A0DB-01A-11R-A277-07	Tumor	Yes	Yes	FEMALE	WHITE	56	Post (prior bilateral ovariectomy OR >12 mo since LMP with no prior hysterectomy)	Right	Core needle biopsy	Infiltrating Ductal Carcinoma	No	Simple Mastectomy	Sentinel lymph node biopsy plus axillary dissection	Close	4	0	N0 (i-)	T2	Stage IIA	M0	YES;YES	Not Available	Arimidex	Not Available	ADJUVANT		Positive	90-99%	Positive	60-69%	Negative	1+	Not Available	Alive	TUMOR FREE	0	1007	0	1007
TCGA-A7-A0DB-01C-02R-A277-07	Tumor	Yes	Yes	FEMALE	WHITE	56	Post (prior bilateral ovariectomy OR >12 mo since LMP with no prior hysterectomy)	Right	Core needle biopsy	Infiltrating Ductal Carcinoma	No	Simple Mastectomy	Sentinel lymph node biopsy plus axillary dissection	Close	4	0	N0 (i-)	T2	Stage IIA	M0	YES;YES	Not Available	Arimidex	Not Available	ADJUVANT		Positive	90-99%	Positive	60-69%	Negative	1+	Not Available	Alive	TUMOR FREE	0	1007	0	1007
TCGA-A7-A0DB-11A-33R-A089-07	Normal	Yes	No	FEMALE	WHITE	56	Post (prior bilateral ovariectomy OR >12 mo since LMP with no prior hysterectomy)	Right	Core needle biopsy	Infiltrating Ductal Carcinoma	No	Simple Mastectomy	Sentinel lymph node biopsy plus axillary dissection	Close	4	0	N0 (i-)	T2	Stage IIA	M0	YES;YES	Not Available	Arimidex	Not Available	ADJUVANT		Positive	90-99%	Positive	60-69%	Negative	1+	Not Available	Alive	TUMOR FREE	0	1007	0	1007
TCGA-A7-A0DC-01A-11R-A00Z-07	Tumor	Yes	No	FEMALE	WHITE	63	Post (prior bilateral ovariectomy OR >12 mo since LMP with no prior hysterectomy)	Right Upper Outer Quadrant;Right	Tumor resection	Infiltrating Ductal Carcinoma	No	Simple Mastectomy	Sentinel lymph node biopsy plus axillary dissection	Negative	3	0	N0 (i-)	T1c	Stage IA	M0	YES;YES	Not Available	Methotrexate;Fluorouracil;Cyclophosphamide;Arimidex;Arimidex;Tamoxifen	Not Available;Not Available;Not Available;Not Available;Not Available;Unknown	ADJUVANT;ADJUVANT;ADJUVANT;ADJUVANT;ADJUVANT;Not Available		Positive	90-99%	Negative	<10%	Negative	1+	Not Available	Alive	TUMOR FREE	0	906	0	906
TCGA-A7-A0DC-01B-04R-A22O-07	Tumor	Yes	Yes	FEMALE	WHITE	63	Post (prior bilateral ovariectomy OR >12 mo since LMP with no prior hysterectomy)	Right Upper Outer Quadrant;Right	Tumor resection	Infiltrating Ductal Carcinoma	No	Simple Mastectomy	Sentinel lymph node biopsy plus axillary dissection	Negative	3	0	N0 (i-)	T1c	Stage IA	M0	YES;YES	Not Available	Methotrexate;Fluorouracil;Cyclophosphamide;Arimidex;Arimidex;Tamoxifen	Not Available;Not Available;Not Available;Not Available;Not Available;Unknown	ADJUVANT;ADJUVANT;ADJUVANT;ADJUVANT;ADJUVANT;Not Available		Positive	90-99%	Negative	<10%	Negative	1+	Not Available	Alive	TUMOR FREE	0	906	0	906
TCGA-A7-A0DC-11A-41R-A089-07	Normal	Yes	No	FEMALE	WHITE	63	Post (prior bilateral ovariectomy OR >12 mo since LMP with no prior hysterectomy)	Right Upper Outer Quadrant;Right	Tumor resection	Infiltrating Ductal Carcinoma	No	Simple Mastectomy	Sentinel lymph node biopsy plus axillary dissection	Negative	3	0	N0 (i-)	T1c	Stage IA	M0	YES;YES	Not Available	Methotrexate;Fluorouracil;Cyclophosphamide;Arimidex;Arimidex;Tamoxifen	Not Available;Not Available;Not Available;Not Available;Not Available;Unknown	ADJUVANT;ADJUVANT;ADJUVANT;ADJUVANT;ADJUVANT;Not Available		Positive	90-99%	Negative	<10%	Negative	1+	Not Available	Alive	TUMOR FREE	0	906	0	906
TCGA-A7-A13D-01A-13R-A12P-07	Tumor	Yes	No	FEMALE	BLACK OR AFRICAN AMERICAN	46	Post (prior bilateral ovariectomy OR >12 mo since LMP with no prior hysterectomy)	Right Upper Outer Quadrant	Core needle biopsy	Infiltrating Ductal Carcinoma	No	Lumpectomy	Sentinel node biopsy alone	Close	4	0	N0 (i-)	T2	Stage IIA	M0	YES;YES	Not Available	Cytoxan;Taxotere	Not Available;Not Available	ADJUVANT;ADJUVANT		Negative	<10%	Positive	<10%	Negative	2+	1.1	Alive	TUMOR FREE	0	965	0	965
TCGA-A7-A13D-01A-13R-A277-07	Tumor	Yes	Yes	FEMALE	BLACK OR AFRICAN AMERICAN	46	Post (prior bilateral ovariectomy OR >12 mo since LMP with no prior hysterectomy)	Right Upper Outer Quadrant	Core needle biopsy	Infiltrating Ductal Carcinoma	No	Lumpectomy	Sentinel node biopsy alone	Close	4	0	N0 (i-)	T2	Stage IIA	M0	YES;YES	Not Available	Cytoxan;Taxotere	Not Available;Not Available	ADJUVANT;ADJUVANT		Negative	<10%	Positive	<10%	Negative	2+	1.1	Alive	TUMOR FREE	0	965	0	965
TCGA-A7-A13D-01B-04R-A277-07	Tumor	Yes	Yes	FEMALE	BLACK OR AFRICAN AMERICAN	46	Post (prior bilateral ovariectomy OR >12 mo since LMP with no prior hysterectomy)	Right Upper Outer Quadrant	Core needle biopsy	Infiltrating Ductal Carcinoma	No	Lumpectomy	Sentinel node biopsy alone	Close	4	0	N0 (i-)	T2	Stage IIA	M0	YES;YES	Not Available	Cytoxan;Taxotere	Not Available;Not Available	ADJUVANT;ADJUVANT		Negative	<10%	Positive	<10%	Negative	2+	1.1	Alive	TUMOR FREE	0	965	0	965
TCGA-A7-A13E-01A-11R-A12P-07	Tumor	Yes	No	FEMALE	WHITE	62	Post (prior bilateral ovariectomy OR >12 mo since LMP with no prior hysterectomy)	Left Upper Outer Quadrant	Core needle biopsy	Infiltrating Ductal Carcinoma	No	Lumpectomy	Sentinel lymph node biopsy plus axillary dissection	Negative	12	2	N1	T2	Stage IIB	MX	YES;NO	Not Available	Arimidex;Bevacizumab;Doxorubicin;Cyclophosphamide;Paclitaxel;Taxol;Anastrozole	Not Available;Not Available;Not Available;Not Available;Not Available;Not Available;Not Available	ADJUVANT;ADJUVANT;ADJUVANT;ADJUVANT;ADJUVANT;PALLIATIVE;ADJUVANT		Positive	20-29%	Negative	<10%	Negative	2+	1.1	Alive	WITH TUMOR	1	614	1	556	556	1	Distant Metastasis	Other, specify
TCGA-A7-A13E-01A-11R-A277-07	Tumor	Yes	Yes	FEMALE	WHITE	62	Post (prior bilateral ovariectomy OR >12 mo since LMP with no prior hysterectomy)	Left Upper Outer Quadrant	Core needle biopsy	Infiltrating Ductal Carcinoma	No	Lumpectomy	Sentinel lymph node biopsy plus axillary dissection	Negative	12	2	N1	T2	Stage IIB	MX	YES;NO	Not Available	Arimidex;Bevacizumab;Doxorubicin;Cyclophosphamide;Paclitaxel;Taxol;Anastrozole	Not Available;Not Available;Not Available;Not Available;Not Available;Not Available;Not Available	ADJUVANT;ADJUVANT;ADJUVANT;ADJUVANT;ADJUVANT;PALLIATIVE;ADJUVANT		Positive	20-29%	Negative	<10%	Negative	2+	1.1	Alive	WITH TUMOR	1	614	1	556	556	1	Distant Metastasis	Other, specify
TCGA-A7-A13E-01B-06R-A277-07	Tumor	Yes	Yes	FEMALE	WHITE	62	Post (prior bilateral ovariectomy OR >12 mo since LMP with no prior hysterectomy)	Left Upper Outer Quadrant	Core needle biopsy	Infiltrating Ductal Carcinoma	No	Lumpectomy	Sentinel lymph node biopsy plus axillary dissection	Negative	12	2	N1	T2	Stage IIB	MX	YES;NO	Not Available	Arimidex;Bevacizumab;Doxorubicin;Cyclophosphamide;Paclitaxel;Taxol;Anastrozole	Not Available;Not Available;Not Available;Not Available;Not Available;Not Available;Not Available	ADJUVANT;ADJUVANT;ADJUVANT;ADJUVANT;ADJUVANT;PALLIATIVE;ADJUVANT		Positive	20-29%	Negative	<10%	Negative	2+	1.1	Alive	WITH TUMOR	1	614	1	556	556	1	Distant Metastasis	Other, specify
TCGA-A7-A13E-11A-61R-A12P-07	Normal	Yes	No	FEMALE	WHITE	62	Post (prior bilateral ovariectomy OR >12 mo since LMP with no prior hysterectomy)	Left Upper Outer Quadrant	Core needle biopsy	Infiltrating Ductal Carcinoma	No	Lumpectomy	Sentinel lymph node biopsy plus axillary dissection	Negative	12	2	N1	T2	Stage IIB	MX	YES;NO	Not Available	Arimidex;Bevacizumab;Doxorubicin;Cyclophosphamide;Paclitaxel;Taxol;Anastrozole	Not Available;Not Available;Not Available;Not Available;Not Available;Not Available;Not Available	ADJUVANT;ADJUVANT;ADJUVANT;ADJUVANT;ADJUVANT;PALLIATIVE;ADJUVANT		Positive	20-29%	Negative	<10%	Negative	2+	1.1	Alive	WITH TUMOR	1	614	1	556	556	1	Distant Metastasis	Other, specify
TCGA-A7-A13F-01A-11R-A12P-07	Tumor	Yes	No	FEMALE	WHITE	44	Pre (<6 months since LMP AND no prior bilateral ovariectomy AND not on estrogen replacement)	Right Upper Outer Quadrant	Core needle biopsy	Infiltrating Ductal Carcinoma	No	Modified Radical Mastectomy	Sentinel lymph node biopsy plus axillary dissection	Negative	11	3	N1a	T3	Stage IIIA	M0	YES;YES	Not Available	Docetaxel;Doxorubicin;Cyclophosphamide;Tamoxifen;Arimidex	Not Available;Not Available;Not Available;Not Available;Not Available	ADJUVANT;ADJUVANT;ADJUVANT;ADJUVANT;ADJUVANT		Positive	Not Available	Positive	Not Available	Negative	2+	1.1	Alive	TUMOR FREE	0	765	0	765
TCGA-A7-A13F-11A-42R-A12P-07	Normal	Yes	No	FEMALE	WHITE	44	Pre (<6 months since LMP AND no prior bilateral ovariectomy AND not on estrogen replacement)	Right Upper Outer Quadrant	Core needle biopsy	Infiltrating Ductal Carcinoma	No	Modified Radical Mastectomy	Sentinel lymph node biopsy plus axillary dissection	Negative	11	3	N1a	T3	Stage IIIA	M0	YES;YES	Not Available	Docetaxel;Doxorubicin;Cyclophosphamide;Tamoxifen;Arimidex	Not Available;Not Available;Not Available;Not Available;Not Available	ADJUVANT;ADJUVANT;ADJUVANT;ADJUVANT;ADJUVANT		Positive	Not Available	Positive	Not Available	Negative	2+	1.1	Alive	TUMOR FREE	0	765	0	765
TCGA-A7-A13G-01B-04R-A22O-07	Tumor	Yes	No	FEMALE	WHITE	79	Post (prior bilateral ovariectomy OR >12 mo since LMP with no prior hysterectomy)	Left	Core needle biopsy	Infiltrating Ductal Carcinoma	No	Simple Mastectomy	Sentinel node biopsy alone	Negative	1	0	N0	T2	Stage IIA	MX	NO;NO	Not Available	Arimidex;Arimidex	Not Available;Not Applicable	ADJUVANT;Not Available		Positive	90-99%	Positive	50-59%	Negative	1+	Not Available	Alive	TUMOR FREE	0	718	1	586	586	1	New Primary Tumor	Other, specify
TCGA-A7-A13G-11A-51R-A13Q-07	Normal	Yes	No	FEMALE	WHITE	79	Post (prior bilateral ovariectomy OR >12 mo since LMP with no prior hysterectomy)	Left	Core needle biopsy	Infiltrating Ductal Carcinoma	No	Simple Mastectomy	Sentinel node biopsy alone	Negative	1	0	N0	T2	Stage IIA	MX	NO;NO	Not Available	Arimidex;Arimidex	Not Available;Not Applicable	ADJUVANT;Not Available		Positive	90-99%	Positive	50-59%	Negative	1+	Not Available	Alive	TUMOR FREE	0	718	1	586	586	1	New Primary Tumor	Other, specify
TCGA-A7-A13H-01A-11R-A22K-07	Tumor	Yes	No	FEMALE	WHITE	61	Post (prior bilateral ovariectomy OR >12 mo since LMP with no prior hysterectomy)	Right	Core needle biopsy	Infiltrating Lobular Carcinoma	No	Simple Mastectomy	Sentinel lymph node biopsy plus axillary dissection	Negative	12	2	N1a	T2	Stage IIB	MX	NO;NO	Not Available	Anastrozole	Not Applicable	Not Available	Her-2	Positive	80-89%	Positive	30-39%	Positive	2+	2.2	Alive	TUMOR FREE	0	899	1	795	795	1	New Primary Tumor	Other, specify
TCGA-A7-A26E-01A-11R-A169-07	Tumor	Yes	No	FEMALE	WHITE	71	Post (prior bilateral ovariectomy OR >12 mo since LMP with no prior hysterectomy)	Left	Core needle biopsy	Infiltrating Lobular Carcinoma	No	Simple Mastectomy	Sentinel lymph node biopsy plus axillary dissection	Negative	16	0	N1a	T3	Stage IIIA	MX	YES;YES	Not Available	Arimidex;Cytoxan;Taxotere	Not Available;Not Available;Not Available	ADJUVANT;ADJUVANT;ADJUVANT		Positive	90-99%	Positive	20-29%	Negative	1+	Not Available	Alive	TUMOR FREE	0	954	0	954
TCGA-A7-A26E-01A-11R-A277-07	Tumor	Yes	Yes	FEMALE	WHITE	71	Post (prior bilateral ovariectomy OR >12 mo since LMP with no prior hysterectomy)	Left	Core needle biopsy	Infiltrating Lobular Carcinoma	No	Simple Mastectomy	Sentinel lymph node biopsy plus axillary dissection	Negative	16	0	N1a	T3	Stage IIIA	MX	YES;YES	Not Available	Arimidex;Cytoxan;Taxotere	Not Available;Not Available;Not Available	ADJUVANT;ADJUVANT;ADJUVANT		Positive	90-99%	Positive	20-29%	Negative	1+	Not Available	Alive	TUMOR FREE	0	954	0	954
TCGA-A7-A26E-01B-06R-A277-07	Tumor	Yes	Yes	FEMALE	WHITE	71	Post (prior bilateral ovariectomy OR >12 mo since LMP with no prior hysterectomy)	Left	Core needle biopsy	Infiltrating Lobular Carcinoma	No	Simple Mastectomy	Sentinel lymph node biopsy plus axillary dissection	Negative	16	0	N1a	T3	Stage IIIA	MX	YES;YES	Not Available	Arimidex;Cytoxan;Taxotere	Not Available;Not Available;Not Available	ADJUVANT;ADJUVANT;ADJUVANT		Positive	90-99%	Positive	20-29%	Negative	1+	Not Available	Alive	TUMOR FREE	0	954	0	954
TCGA-A7-A26F-01B-04R-A22O-07	Tumor	Yes	No	FEMALE	WHITE	55	Post (prior bilateral ovariectomy OR >12 mo since LMP with no prior hysterectomy)	Left	Fine needle aspiration biopsy	Other, specify	No	Lumpectomy	Sentinel node biopsy alone	Close	1	0	N0	T1	Stage IA	M0	YES;YES	Not Available	Taxotere;Cytoxan	Not Available;Not Available	ADJUVANT;ADJUVANT	TNBC	Negative	Not Available	Negative	Not Available	Negative	2+	1.1	Alive	TUMOR FREE	0	738	0	738
TCGA-A7-A26G-01A-21R-A169-07	Tumor	Yes	No	FEMALE	BLACK OR AFRICAN AMERICAN	50	Pre (<6 months since LMP AND no prior bilateral ovariectomy AND not on estrogen replacement)	Right	Core needle biopsy	Other, specify	No	Other	Sentinel lymph node biopsy plus axillary dissection	Negative	2	0	N0 (i+)	T2	Stage IIA	M0	NO;NO	Not Available	Taxotere;Cytoxan	Not Available;Not Available	ADJUVANT;ADJUVANT	TNBC	Negative	Not Available	Negative	Not Available	Negative	Not Available	Not Available	Alive	TUMOR FREE	0	722	0	722
TCGA-A7-A26H-01A-11R-A169-07	Tumor	Yes	No	FEMALE	WHITE	72	Post (prior bilateral ovariectomy OR >12 mo since LMP with no prior hysterectomy)	Left	Core needle biopsy	Infiltrating Ductal Carcinoma	No	Other	Sentinel lymph node biopsy plus axillary dissection	Negative	5	1	N1a	T1	Stage IIA	M0	NO;NO	Not Available	Anastrozole;Taxol	Not Available;Not Available	ADJUVANT;RECURRENCE	Her-2	Positive	90-99%	Negative	Not Available	Positive	2+	2.6	Alive	WITH TUMOR	0	724	1	291	291	1	Distant Metastasis	Liver
TCGA-A7-A26I-01B-06R-A22O-07	Tumor	Yes	No	FEMALE	WHITE	65	Post (prior bilateral ovariectomy OR >12 mo since LMP with no prior hysterectomy)	Left	Fine needle aspiration biopsy	Infiltrating Ductal Carcinoma	No	Lumpectomy	Axillary lymph node dissection alone	Close	2	0	N0	T2	Stage IIA	M0	YES;YES	Not Available	Cytoxan;Taxotere	Not Available;Not Available	ADJUVANT;ADJUVANT	TNBC	Negative	Not Available	Negative	Not Available	Negative	2+	1.1	Alive	TUMOR FREE	0	661	0	661
TCGA-A7-A26J-01A-11R-A169-07	Tumor	Yes	No	FEMALE	WHITE	49	Pre (<6 months since LMP AND no prior bilateral ovariectomy AND not on estrogen replacement)	Left	Core needle biopsy	Infiltrating Ductal Carcinoma	No	Simple Mastectomy	Sentinel lymph node biopsy plus axillary dissection	Negative	4	0	N0	T2	Stage IIA	M0	NO;NO	Not Available	Tamoxifen	Not Available	ADJUVANT		Positive	90-99%	Positive	70-79%	Negative	1+	Not Available	Alive	TUMOR FREE	0	627	0	627
TCGA-A7-A26J-01A-11R-A277-07	Tumor	Yes	Yes	FEMALE	WHITE	49	Pre (<6 months since LMP AND no prior bilateral ovariectomy AND not on estrogen replacement)	Left	Core needle biopsy	Infiltrating Ductal Carcinoma	No	Simple Mastectomy	Sentinel lymph node biopsy plus axillary dissection	Negative	4	0	N0	T2	Stage IIA	M0	NO;NO	Not Available	Tamoxifen	Not Available	ADJUVANT		Positive	90-99%	Positive	70-79%	Negative	1+	Not Available	Alive	TUMOR FREE	0	627	0	627
TCGA-A7-A26J-01B-02R-A277-07	Tumor	Yes	Yes	FEMALE	WHITE	49	Pre (<6 months since LMP AND no prior bilateral ovariectomy AND not on estrogen replacement)	Left	Core needle biopsy	Infiltrating Ductal Carcinoma	No	Simple Mastectomy	Sentinel lymph node biopsy plus axillary dissection	Negative	4	0	N0	T2	Stage IIA	M0	NO;NO	Not Available	Tamoxifen	Not Available	ADJUVANT		Positive	90-99%	Positive	70-79%	Negative	1+	Not Available	Alive	TUMOR FREE	0	627	0	627
TCGA-A7-A2KD-01A-31R-A21T-07	Tumor	Yes	No	FEMALE	BLACK OR AFRICAN AMERICAN	53	Post (prior bilateral ovariectomy OR >12 mo since LMP with no prior hysterectomy)	Right	Core needle biopsy	Infiltrating Ductal Carcinoma	No	Modified Radical Mastectomy	No axillary staging	Negative	10	8	N2a	T2	Stage IIIA	MX	YES;YES	Not Available	Cytoxan;Taxotere;Carboplatin;Herceptin	Not Available;Not Available;Not Available;Complete Response	ADJUVANT;ADJUVANT;ADJUVANT;Not Available	Her-2	Positive	90-99%	Positive	90-99%	Positive	3+	Not Available	Alive	TUMOR FREE	0	679	0	679
TCGA-A7-A3IY-01A-21R-A21T-07	Tumor	Yes	No	FEMALE	WHITE	71	Post (prior bilateral ovariectomy OR >12 mo since LMP with no prior hysterectomy)	Right Upper Outer Quadrant	Core needle biopsy	Mucinous Carcinoma	No	Lumpectomy	Sentinel node biopsy alone	Close	1	0	N0	T1c	Stage I	M0	YES	Not Available	Anastrozole	Not Applicable	Not Available		Positive	90-99%	Positive	90-99%	Negative	Not Available	Not Available	Alive	TUMOR FREE	0	345	0	345
TCGA-A7-A3IZ-01A-11R-A213-07	Tumor	Yes	No	FEMALE	WHITE	62	Post (prior bilateral ovariectomy OR >12 mo since LMP with no prior hysterectomy)	Right	Core needle biopsy	Infiltrating Lobular Carcinoma	No	Lumpectomy	Sentinel lymph node biopsy plus axillary dissection	Positive	1	1	N0 (i+)	T2	Stage IIA	M0	YES	Not Available	Cytoxan;Taxotere;Anastrozole	Not Available;Not Available;Not Applicable	ADJUVANT;ADJUVANT;Not Available		Positive	90-99%	Negative	<10%	Negative	2+	1	Alive	TUMOR FREE	0	322	0	322
TCGA-A7-A3J0-01A-11R-A213-07	Tumor	Yes	No	FEMALE	WHITE	62	Post (prior bilateral ovariectomy OR >12 mo since LMP with no prior hysterectomy)	Right	Core needle biopsy	Mucinous Carcinoma	No	Lumpectomy	Sentinel node biopsy alone	Negative	2	0	N0	T2	Stage IIA	M0	YES	Not Available	Anastrazole	Not Applicable	Not Available		Positive	90-99%	Positive	90-99%	Negative	1+	Not Available	Alive	TUMOR FREE	0	313	0	313
TCGA-A7-A3J1-01A-11R-A213-07	Tumor	Yes	No	FEMALE	WHITE	63	Post (prior bilateral ovariectomy OR >12 mo since LMP with no prior hysterectomy)	Left	Core needle biopsy	Infiltrating Lobular Carcinoma	No	Lumpectomy	Sentinel lymph node biopsy plus axillary dissection	Negative	1	0	N0	T1c	Stage IA	MX	YES	Not Available	Anastrazole;Tamoxifen;Aromasin	Unknown;Unknown;Not Applicable	Not Available;Not Available;Not Available		Positive	90-99%	Positive	<10%	Negative	Not Available	Not Available	Alive	TUMOR FREE	0	343	0	343
TCGA-A7-A3RF-01A-11R-A22K-07	Tumor	Yes	No	FEMALE	WHITE	79	Post (prior bilateral ovariectomy OR >12 mo since LMP with no prior hysterectomy)	Left Upper Outer Quadrant	Core needle biopsy	Mucinous Carcinoma	No	Lumpectomy	Sentinel node biopsy alone	Positive	2	0	N0	T2	Stage IIA	M0	YES	Not Available	Anastrozole	Clinical Progressive Disease	Not Available		Positive	90-99%	Positive	30-39%	Negative	Not Available	Not Available	Alive	WITH TUMOR	0	408	1	174	174	1	Distant Metastasis	Bone;Liver
TCGA-A7-A425-01A-11R-A24H-07	Tumor	Yes	No	FEMALE	WHITE	70	Post (prior bilateral ovariectomy OR >12 mo since LMP with no prior hysterectomy)	Right	Core needle biopsy	Infiltrating Lobular Carcinoma	No	Modified Radical Mastectomy	Sentinel lymph node biopsy plus axillary dissection	Negative	19	12	N3a	T3	Stage IIIC	MX	YES	YES	Adriamycin;Cytoxan;Taxol;Arimidex	Unknown;Unknown;Unknown;Not Applicable	Not Available;Not Available;Not Available;Not Available	Her-2	Positive	90-99%	Positive	70-79%	Positive	3+	1.1	Alive	WITH TUMOR	0	447	1	419	419	1	Locoregional Recurrence;Distant Metastasis	Other, specify;Bone
TCGA-A7-A426-01A-22R-A24H-07	Tumor	Yes	No	FEMALE	WHITE	50	Pre (<6 months since LMP AND no prior bilateral ovariectomy AND not on estrogen replacement)	Right	Core needle biopsy	Infiltrating Lobular Carcinoma	No	Simple Mastectomy	Sentinel lymph node biopsy plus axillary dissection	Negative	20	13	N3a	T3	Stage IIIC	MX	YES	YES	Adriamycin;Cytoxan;Taxol;Tamoxifen	Unknown;Unknown;Unknown;Not Applicable	Not Available;Not Available;Not Available;Not Available		Positive	70-79%	Positive	70-79%	Negative	Not Available	Not Available	Alive	TUMOR FREE	0	364	0	364
TCGA-A7-A4SA-01A-11R-A266-07	Tumor	Yes	No	FEMALE	WHITE	40	Pre (<6 months since LMP AND no prior bilateral ovariectomy AND not on estrogen replacement)	Left Lower Outer Quadrant	Core needle biopsy	Infiltrating Lobular Carcinoma	No	Simple Mastectomy	Sentinel lymph node biopsy plus axillary dissection	Negative	10	1	N1a	T2	Stage IIB	M0	NO	NO	Doxorubicin;Cyclophosphamide;Paclitaxel;Tamoxifen	Complete Response;Complete Response;Complete Response;Not Applicable	Not Available;Not Available;Not Available;Not Available		Positive	80-89%	Negative	Not Available	Negative	1+	Not Available	Alive	TUMOR FREE	0	454	0	454
TCGA-A7-A4SB-01A-21R-A266-07	Tumor	Yes	No	FEMALE	WHITE	56	Post (prior bilateral ovariectomy OR >12 mo since LMP with no prior hysterectomy)	Right Upper Outer Quadrant	Core needle biopsy	Infiltrating Lobular Carcinoma	No	Lumpectomy	Sentinel node biopsy alone	Positive	2	1	N1mi	T3	Stage IIIA	M0	YES	YES	Docetaxel;Cyclophosphamide;Anastrozole	Complete Response;Complete Response;Not Applicable	Not Available;Not Available;Not Available		Positive	70-79%	Positive	50-59%	Negative	Not Available	Not Available	Alive	TUMOR FREE	0	418	0	418
TCGA-A7-A4SC-01A-12R-A266-07	Tumor	Yes	No	FEMALE	WHITE	62	Post (prior bilateral ovariectomy OR >12 mo since LMP with no prior hysterectomy)	Right Upper Outer Quadrant	Core needle biopsy	Infiltrating Lobular Carcinoma	No	Simple Mastectomy	Not Available	Negative	1	0	N0	T3	Stage IIB	MX	YES	YES	TAMOXIFEN;TAMOXIFEN	Unknown;Not Applicable	Not Available;Not Available	Her-2	Positive	90-99%	Negative	Not Available	Positive	3+	1.1	Alive	TUMOR FREE	0	446	0	446
TCGA-A7-A4SD-01A-11R-A266-07	Tumor	Yes	No	FEMALE	BLACK OR AFRICAN AMERICAN	52	Post (prior bilateral ovariectomy OR >12 mo since LMP with no prior hysterectomy)	Right	Core needle biopsy	Infiltrating Ductal Carcinoma	No	Simple Mastectomy	Sentinel node biopsy alone	Negative	6	0	N0	T2	Stage IIA	M0	NO	NO	Taxotere;Cytoxan	Complete Response;Complete Response	Not Available;Not Available	TNBC	Negative	Not Available	Negative	Not Available	Negative	2+	1.3	Alive	TUMOR FREE	0	441	0	441
TCGA-A7-A4SE-01A-11R-A266-07	Tumor	Yes	No	FEMALE	BLACK OR AFRICAN AMERICAN	54	Post (prior bilateral ovariectomy OR >12 mo since LMP with no prior hysterectomy)	Left	Core needle biopsy	Infiltrating Ductal Carcinoma	No	Lumpectomy	Sentinel node biopsy alone	Negative	3	0	N0	T2	Stage IIA	M0	NO	NO	Adriamycin;Cytoxan;Taxol	Complete Response;Complete Response;Complete Response	Not Available;Not Available;Not Available	TNBC	Negative	Not Available	Negative	Not Available	Negative	1+	Not Available	Alive	TUMOR FREE	0	644	0	644
TCGA-A7-A4SF-01A-11R-A266-07	Tumor	Yes	No	FEMALE	BLACK OR AFRICAN AMERICAN	54	Post (prior bilateral ovariectomy OR >12 mo since LMP with no prior hysterectomy)	Right	Core needle biopsy	Infiltrating Ductal Carcinoma	No	Lumpectomy	Sentinel node biopsy alone	Positive	2	0	N0	T2	Stage IIA	M0	YES	YES	Carboplatin;Docetaxel;Trastuzumab;Anastrozole	Complete Response;Complete Response;Complete Response;Not Applicable	Not Available;Not Available;Not Available;Not Available	Her-2	Positive	90-99%	Negative	Not Available	Positive	3+	Not Available	Alive	TUMOR FREE	0	545	0	545
TCGA-A7-A56D-01A-11R-A27Q-07	Tumor	Yes	No	FEMALE	BLACK OR AFRICAN AMERICAN	84	Post (prior bilateral ovariectomy OR >12 mo since LMP with no prior hysterectomy)	Left Lower Inner Quadrant	Core needle biopsy	Infiltrating Ductal Carcinoma	No	Lumpectomy	Sentinel lymph node biopsy plus axillary dissection	Negative	8	0	N0	T2	Stage IIA	M0	NO	NO	Arimidex	Not Applicable	Not Available		Positive	90-99%	Positive	<10%	Negative	Not Available	Not Available	Alive	TUMOR FREE	0	448	0	448
TCGA-A7-A5ZV-01A-11R-A28M-07	Tumor	Yes	No	FEMALE	BLACK OR AFRICAN AMERICAN	62	Post (prior bilateral ovariectomy OR >12 mo since LMP with no prior hysterectomy)	Left	Core needle biopsy	Infiltrating Carcinoma NOS	No	Lumpectomy	Sentinel node biopsy alone	Negative	2	0	N0	T2	Stage IIA	M0	YES	NO	Doxorubicin;Cyclophosphamide;Paclitaxel	Complete Response;Complete Response;Complete Response	Not Available;Not Available;Not Available	TNBC	Negative	Not Available	Negative	Not Available	Negative	2+	1.5	Alive	TUMOR FREE	0	368	0	368
TCGA-A7-A5ZW-01A-12R-A29R-07	Tumor	Yes	No	FEMALE	BLACK OR AFRICAN AMERICAN	47	Pre	Right Upper Outer Quadrant	Core needle biopsy	Infiltrating Ductal Carcinoma	No	Lumpectomy	Sentinel node biopsy alone	Negative	1	1	N1a	T1c	Stage IIA	M0	YES	NO	Cyclophosphamide;Taxotere;Tamoxifen	Complete Response;Complete Response;Not Applicable	Not Available;Not Available;Not Available		Positive	90-99%	Positive	80-89%	Negative	1+	Not Available	Alive	TUMOR FREE	0	326	0	326
TCGA-A7-A5ZX-01A-12R-A29R-07	Tumor	Yes	No	FEMALE	WHITE	48	Pre (<6 months since LMP AND no prior bilateral ovariectomy AND not on estrogen replacement)	Left	Core needle biopsy	Infiltrating Lobular Carcinoma	No	Other	Sentinel lymph node biopsy plus axillary dissection	Unknown	24	21	N3a	T2	Stage IIIC	M0	YES	NO	Doxorubicin;Cyclophosphamide;Paclitaxel;Tamoxifen	Complete Response;Complete Response;Complete Response;Complete Response	Not Available;Not Available;Not Available;Not Available		Positive	Not Available	Positive	Not Available	Negative	Not Available	Not Available	Alive	TUMOR FREE	0	336	0	336
TCGA-A7-A6VV-01A-22R-A33J-07	Tumor	Yes	No	FEMALE	BLACK OR AFRICAN AMERICAN	51	Peri (6-12 months since last menstrual period)	Right	Core needle biopsy	Infiltrating Ductal Carcinoma	No	Modified Radical Mastectomy	Sentinel lymph node biopsy plus axillary dissection	Negative	5	0	N0	T2	Stage IIA	M0	NO	NO	Cyclophosphamide;Taxotere	Complete Response;Complete Response	Not Available;Not Available	TNBC	Negative	Not Available	Negative	Not Available	Negative	Not Available	Not Available	Alive	TUMOR FREE	0	313	0	313
TCGA-A7-A6VW-01A-21R-A33J-07	Tumor	Yes	No	FEMALE	BLACK OR AFRICAN AMERICAN	48	Post (prior bilateral ovariectomy OR >12 mo since LMP with no prior hysterectomy)	Left	Core needle biopsy	Infiltrating Ductal Carcinoma	No	Lumpectomy	Sentinel node biopsy alone	Close	2	0	N0	T2	Stage IIA	M0	YES	NO	Taxol;Doxorubicin;Cyclophosphamide	Complete Response;Complete Response;Complete Response	Not Available;Not Available;Not Available	TNBC	Negative	Not Available	Negative	Not Available	Negative	Not Available	Not Available	Alive	TUMOR FREE	0	285	0	285
TCGA-A7-A6VX-01A-12R-A33J-07	Tumor	Yes	No	FEMALE	BLACK OR AFRICAN AMERICAN	68	Post (prior bilateral ovariectomy OR >12 mo since LMP with no prior hysterectomy)	Left;Left Upper Outer Quadrant	Core needle biopsy	Infiltrating Ductal Carcinoma	No	Lumpectomy	Sentinel node biopsy alone	Negative	2	0	N0	T2	Stage IIA	M0	YES	YES	Docetaxel;Cyclophosphamide;Anastrazole	Complete Response;Complete Response;Not Applicable	Not Available;Not Available;Not Available		Positive	90-99%	Positive	Not Available	Negative	1+	Not Available	Alive	TUMOR FREE	0	317	0	317
TCGA-A7-A6VY-01A-12R-A33J-07	Tumor	Yes	No	FEMALE	BLACK OR AFRICAN AMERICAN	48	Post (prior bilateral ovariectomy OR >12 mo since LMP with no prior hysterectomy)	Right;Right Upper Outer Quadrant	Core needle biopsy	Infiltrating Ductal Carcinoma	No	Lumpectomy	Sentinel lymph node biopsy plus axillary dissection	Negative	14	2	N1	T2	Stage IIB	M0	YES	NO	Cyclophosphamide;Doxorubicin;Paclitaxel	Complete Response;Complete Response;Complete Response	Not Available;Not Available;Not Available	TNBC	Negative	Not Available	Negative	Not Available	Negative	Not Available	Not Available	Alive	TUMOR FREE	0	266	0	266
TCGA-A8-A06N-01A-11R-A00Z-07	Tumor	Yes	No	FEMALE	Not Available	66	Post (prior bilateral ovariectomy OR >12 mo since LMP with no prior hysterectomy)	Left	Not Available	Infiltrating Ductal Carcinoma	No	Other	Not Available	Negative	Not Available	Not Available	N0	T4b	Stage IIIB	M0		Not Available					Positive	Not Available	Negative	Not Available	Negative	0	Not Available	Alive	TUMOR FREE	0	0	0	0
TCGA-A8-A06O-01A-11R-A00Z-07	Tumor	Yes	No	FEMALE	Not Available	60	Post (prior bilateral ovariectomy OR >12 mo since LMP with no prior hysterectomy)	Left	Not Available	Infiltrating Ductal Carcinoma	No	Other	Not Available	Negative	Not Available	Not Available	N0	T1c	Stage I	M0	NO	Not Available	Letrozole	Not Applicable	Not Available		Positive	Not Available	Positive	Not Available	Negative	1+	Not Available	Alive	TUMOR FREE	0	396	0	396
TCGA-A8-A06P-01A-11R-A00Z-07	Tumor	Yes	No	FEMALE	Not Available	63	Post (prior bilateral ovariectomy OR >12 mo since LMP with no prior hysterectomy)	Right	Not Available	Infiltrating Ductal Carcinoma	No	Other	Not Available	Negative	Not Available	Not Available	N2a	T1c	Stage IIIA	M0	YES	Not Available	Not Available;Tamoxifen	Unknown;Unknown	Not Available;Not Available		Positive	Not Available	Positive	Not Available	Negative	Not Available	Not Available	Alive	TUMOR FREE	0	396	0	396
TCGA-A8-A06Q-01A-11R-A034-07	Tumor	Yes	No	FEMALE	Not Available	63	Post (prior bilateral ovariectomy OR >12 mo since LMP with no prior hysterectomy)	Left Upper Outer Quadrant	Not Available	Infiltrating Ductal Carcinoma	No	Other	Not Available	Negative	Not Available	Not Available	N2	T3	Stage IIIA	M0		Not Available					Positive	Not Available	Positive	Not Available	Negative	1+	Not Available	Alive	TUMOR FREE	0	31	0	31
TCGA-A8-A06R-01A-11R-A00Z-07	Tumor	Yes	No	FEMALE	Not Available	69	Post (prior bilateral ovariectomy OR >12 mo since LMP with no prior hysterectomy)	Right Upper Outer Quadrant	Not Available	Infiltrating Ductal Carcinoma	No	Other	Not Available	Negative	Not Available	Not Available	N1a	T2	Stage IIB	M0	YES	Not Available	5-Fluorouracil;Doxorubicin;Cyclophosphamide;Tamoxifen	Complete Response;Complete Response;Complete Response;Complete Response	Not Available;Not Available;Not Available;Not Available	Her-2	Positive	Not Available	Negative	Not Available	Positive	2+	Not Available	Alive	TUMOR FREE	0	547	0	547
TCGA-A8-A06T-01A-11R-A00Z-07	Tumor	Yes	No	FEMALE	Not Available	75	Post (prior bilateral ovariectomy OR >12 mo since LMP with no prior hysterectomy)	Left Upper Outer Quadrant	Not Available	Infiltrating Ductal Carcinoma	No	Other	Not Available	Negative	Not Available	Not Available	N1a	T3	Stage IIIA	M0	NO	Not Available	Anastrozole	Not Applicable	Not Available	Her-2	Positive	Not Available	Positive	Not Available	Positive	2+	Not Available	Alive	TUMOR FREE	0	1614	0	1614
TCGA-A8-A06U-01A-11R-A00Z-07	Tumor	Yes	No	FEMALE	Not Available	80	Post (prior bilateral ovariectomy OR >12 mo since LMP with no prior hysterectomy)	Right Upper Outer Quadrant	Not Available	Infiltrating Ductal Carcinoma	No	Other	Not Available	Negative	Not Available	Not Available	N1a	T2	Stage IIB	M0	NO	Not Available				Her-2	Positive	Not Available	Positive	Not Available	Positive	2+	Not Available	Dead	TUMOR FREE	1	883	0	883
TCGA-A8-A06X-01A-21R-A00Z-07	Tumor	Yes	No	FEMALE	Not Available	77	Post (prior bilateral ovariectomy OR >12 mo since LMP with no prior hysterectomy)	Right Upper Outer Quadrant	Not Available	Infiltrating Ductal Carcinoma	No	Other	Not Available	Negative	Not Available	Not Available	N0	T3	Stage IIB	M0	YES	Not Available				Her-2	Positive	Not Available	Negative	Not Available	Positive	3+	Not Available	Dead	TUMOR FREE	1	943	0	943
TCGA-A8-A06Y-01A-21R-A00Z-07	Tumor	Yes	No	FEMALE	Not Available	66	Post (prior bilateral ovariectomy OR >12 mo since LMP with no prior hysterectomy)	Left Upper Outer Quadrant	Not Available	Infiltrating Ductal Carcinoma	No	Other	Not Available	Negative	Not Available	Not Available	N0	T2	Stage IIA	M0	YES	Not Available	Anastrozole	Not Applicable	Not Available		Positive	Not Available	Positive	Not Available	Negative	1+	Not Available	Alive	TUMOR FREE	0	791	1	791	791	1
TCGA-A8-A06Z-01A-11R-A00Z-07	Tumor	Yes	No	FEMALE	Not Available	84	Post (prior bilateral ovariectomy OR >12 mo since LMP with no prior hysterectomy)	Right Upper Outer Quadrant	Not Available	Infiltrating Ductal Carcinoma	No	Other	Not Available	Not Available	Not Available	Not Available	N0	T3	Stage IIB	M0		Not Available					Positive	Not Available	Positive	Not Available	Negative	1+	Not Available	Alive		0	31	0	31
TCGA-A8-A075-01A-11R-A084-07	Tumor	Yes	No	FEMALE	Not Available	42	Pre (<6 months since LMP AND no prior bilateral ovariectomy AND not on estrogen replacement)	Left Upper Outer Quadrant	Not Available	Infiltrating Ductal Carcinoma	No	Other	Not Available	Negative	Not Available	Not Available	N1a	T2	Stage IIB	M0	YES	Not Available	Epirubicoin;Cyclophosphamide;Docetaxel;Tamoxifen;Zoledronic acid	Complete Response;Complete Response;Complete Response;Not Applicable;Not Applicable	Not Available;Not Available;Not Available;Not Available;Not Available	Her-2	Positive	Not Available	Positive	Not Available	Positive	2+	Not Available	Alive	TUMOR FREE	0	518	0	518
TCGA-A8-A076-01A-21R-A00Z-07	Tumor	Yes	No	FEMALE	Not Available	66	Post (prior bilateral ovariectomy OR >12 mo since LMP with no prior hysterectomy)	Left Upper Outer Quadrant	Not Available	Infiltrating Ductal Carcinoma	No	Other	Not Available	Negative	Not Available	Not Available	N0	T2	Stage IIA	M0	NO	Not Available	Anastrozole	Not Applicable	Not Available	Her-2	Positive	Not Available	Positive	Not Available	Positive	3+	Not Available	Alive	TUMOR FREE	0	1642	0	1642
TCGA-A8-A079-01A-21R-A00Z-07	Tumor	Yes	No	FEMALE	Not Available	69	Post (prior bilateral ovariectomy OR >12 mo since LMP with no prior hysterectomy)	Left Upper Outer Quadrant	Not Available	Infiltrating Ductal Carcinoma	No	Other	Not Available	Negative	Not Available	Not Available	N3	T4b	Stage IIIB	M0	YES	Not Available	5-Fluorouracil;Epirubicin;Cyclophosphamide	Unknown;Unknown;Unknown	Not Available;Not Available;Not Available		Positive	Not Available	Positive	Not Available	Negative	1+	Not Available	Alive	TUMOR FREE	0	274	0	274
TCGA-A8-A07B-01A-11R-A00Z-07	Tumor	Yes	No	FEMALE	Not Available	69	Post (prior bilateral ovariectomy OR >12 mo since LMP with no prior hysterectomy)	Left Lower Outer Quadrant	Not Available	Infiltrating Ductal Carcinoma	No	Other	Not Available	Negative	Not Available	Not Available	N0	T2	Stage IIA	M0	NO	Not Available				Her-2	Positive	Not Available	Positive	Not Available	Positive	3+	Not Available	Alive	TUMOR FREE	0	1308	0	1308
TCGA-A8-A07C-01A-11R-A034-07	Tumor	Yes	No	FEMALE	Not Available	57	Post (prior bilateral ovariectomy OR >12 mo since LMP with no prior hysterectomy)	Right Upper Outer Quadrant	Not Available	Infiltrating Ductal Carcinoma	No	Other	Not Available	Negative	Not Available	Not Available	N0	T2	Stage IIA	M0	YES	Not Available	5-Fluorouracil;Epirubicin;Cyclophosphamide;Docetaxel	Complete Response;Complete Response;Complete Response;Complete Response	Not Available;Not Available;Not Available;Not Available	TNBC	Negative	Not Available	Negative	Not Available	Negative	1+	Not Available	Alive	TUMOR FREE	0	1034	0	1034
TCGA-A8-A07E-01A-11R-A034-07	Tumor	Yes	No	FEMALE	Not Available	81	Post (prior bilateral ovariectomy OR >12 mo since LMP with no prior hysterectomy)	Left Upper Outer Quadrant	Not Available	Infiltrating Ductal Carcinoma	No	Other	Not Available	Negative	Not Available	Not Available	N3a	T4b	Stage X	MX	NO	Not Available	Letrozole	Not Applicable	Not Available		Positive	Not Available	Positive	Not Available	Negative	1+	Not Available	Alive	TUMOR FREE	0	608	0	608
TCGA-A8-A07F-01A-11R-A00Z-07	Tumor	Yes	No	FEMALE	Not Available	65	Post (prior bilateral ovariectomy OR >12 mo since LMP with no prior hysterectomy)	Left Upper Outer Quadrant	Not Available	Infiltrating Ductal Carcinoma	No	Other	Not Available	Negative	Not Available	Not Available	N1a	T2	Stage IIB	M0	YES	Not Available	5-Fluorouracil;Epirubicin;Cyclophosphamide;Tamoxifen	Complete Response;Complete Response;Complete Response;Not Applicable	Not Available;Not Available;Not Available;Not Available		Positive	Not Available	Positive	Not Available	Negative	1+	Not Available	Alive	TUMOR FREE	0	577	0	577
TCGA-A8-A07G-01A-11R-A034-07	Tumor	Yes	No	FEMALE	Not Available	65	Post (prior bilateral ovariectomy OR >12 mo since LMP with no prior hysterectomy)	Right Upper Outer Quadrant	Not Available	Infiltrating Ductal Carcinoma	No	Other	Not Available	Negative	Not Available	Not Available	N1a	T1c	Stage IIA	M0	YES	Not Available	5-Fluorouracil;Methotrexate;Cyclophosphamide;Letrozole	Complete Response;Complete Response;Complete Response;Not Applicable	Not Available;Not Available;Not Available;Not Available		Positive	Not Available	Positive	Not Available	Negative	1+	Not Available	Alive	TUMOR FREE	0	577	0	577
TCGA-A8-A07I-01A-11R-A00Z-07	Tumor	Yes	No	FEMALE	Not Available	69	Post (prior bilateral ovariectomy OR >12 mo since LMP with no prior hysterectomy)	Left Upper Outer Quadrant	Not Available	Infiltrating Ductal Carcinoma	No	Other	Not Available	Negative	Not Available	Not Available	N2a	T2	Stage IIIA	M0	YES	Not Available	5-Fluorouracil;Epirubicin;Cyclophosphamide;Docetaxel;Exemestane;Trastuzumab	Complete Response;Complete Response;Complete Response;Complete Response;Clinical Progressive Disease;Complete Response	Not Available;Not Available;Not Available;Not Available;Not Available;Not Available	Her-2	Positive	Not Available	Negative	Not Available	Positive	3+	Not Available	Alive	TUMOR FREE	0	426	0	426
TCGA-A8-A07J-01A-11R-A00Z-07	Tumor	Yes	No	FEMALE	Not Available	35	Pre (<6 months since LMP AND no prior bilateral ovariectomy AND not on estrogen replacement)	Right Upper Outer Quadrant	Not Available	Infiltrating Ductal Carcinoma	No	Other	Not Available	Negative	Not Available	Not Available	N1a	T2	Stage IIB	M0	YES	Not Available	5-Fluorouracil;Epirubicin;Cyclophosphamide;Docetaxel;Tamoxifen	Complete Response;Complete Response;Complete Response;Complete Response;Not Applicable	Not Available;Not Available;Not Available;Not Available;Not Available		Positive	Not Available	Positive	Not Available	Negative	1+	Not Available	Alive	TUMOR FREE	0	365	0	365
TCGA-A8-A07L-01A-11R-A00Z-07	Tumor	Yes	No	FEMALE	Not Available	58	Post (prior bilateral ovariectomy OR >12 mo since LMP with no prior hysterectomy)	Right Upper Outer Quadrant	Not Available	Infiltrating Ductal Carcinoma	No	Other	Not Available	Negative	Not Available	Not Available	N1a	T3	Stage IIIA	M0	YES	Not Available	Not Available;Anastrozole	Complete Response;Not Applicable	Not Available;Not Available		Positive	Not Available	Positive	Not Available	Negative	0	Not Available	Alive	TUMOR FREE	0	975	0	975
TCGA-A8-A07O-01A-11R-A00Z-07	Tumor	Yes	No	FEMALE	Not Available	51	Post (prior bilateral ovariectomy OR >12 mo since LMP with no prior hysterectomy)	Right Upper Outer Quadrant	Not Available	Infiltrating Ductal Carcinoma	No	Other	Not Available	Negative	Not Available	Not Available	N0	T2	Stage IIA	M0	YES	Not Available	Not Available	Complete Response	Not Available	TNBC	Negative	Not Available	Negative	Not Available	Negative	1+	Not Available	Alive	TUMOR FREE	0	304	0	304
TCGA-A8-A07P-01A-11R-A00Z-07	Tumor	Yes	No	FEMALE	Not Available	68	Post (prior bilateral ovariectomy OR >12 mo since LMP with no prior hysterectomy)	Left Upper Outer Quadrant	Not Available	Infiltrating Ductal Carcinoma	No	Other	Not Available	Negative	Not Available	Not Available	N1	T2	Stage IIB	M0	YES	Not Available	5-Fluorouracil;Doxorubicin;Cyclophosphamide;Docetaxel;Anastrozole	Unknown;Unknown;Unknown;Unknown;Not Applicable	Not Available;Not Available;Not Available;Not Available;Not Available	Her-2	Positive	Not Available	Positive	Not Available	Positive	2+	Not Available	Alive	TUMOR FREE	0	334	0	334
TCGA-A8-A07R-01A-21R-A034-07	Tumor	Yes	No	FEMALE	Not Available	80	Post	Left Upper Outer Quadrant	Not Available	Infiltrating Ductal Carcinoma	No	Other	Not Available	Positive	Not Available	Not Available	N3a	T2	Stage IIIC	M0		Not Available	Zoledronic acid	Not Applicable	Not Available	Her-2	Negative	Not Available	Negative	Not Available	Positive	2+	Not Available	Alive		0	273	0	273
TCGA-A8-A07S-01A-11R-A034-07	Tumor	Yes	No	FEMALE	Not Available	73	Post (prior bilateral ovariectomy OR >12 mo since LMP with no prior hysterectomy)	Left Upper Outer Quadrant	Not Available	Mixed Histology (please specify)	No	Other	Not Available	Positive	Not Available	Not Available	N0	T2	Stage IIA	M0	YES	Not Available	Tamoxifen	Not Applicable	Not Available		Positive	Not Available	Negative	Not Available	Negative	Not Available	Not Available	Alive	WITH TUMOR	0	243	0	243
TCGA-A8-A07U-01A-11R-A034-07	Tumor	Yes	No	FEMALE	Not Available	66	Post (prior bilateral ovariectomy OR >12 mo since LMP with no prior hysterectomy)	Right Upper Outer Quadrant	Not Available	Infiltrating Ductal Carcinoma	No	Other	Not Available	Negative	Not Available	Not Available	N2a	T2	Stage IIIA	M0	YES	Not Available	5-Fluorouracil;Epirubicin;Cyclophosphamide;Docetaxel	Unknown;Unknown;Unknown;Unknown	Not Available;Not Available;Not Available;Not Available		Negative	Not Available	Positive	Not Available	Negative	Not Available	Not Available	Alive	TUMOR FREE	0	760	0	760
TCGA-A8-A07W-01A-11R-A00Z-07	Tumor	Yes	No	FEMALE	Not Available	76	Post (prior bilateral ovariectomy OR >12 mo since LMP with no prior hysterectomy)	Left Upper Outer Quadrant	Not Available	Infiltrating Ductal Carcinoma	No	Other	Not Available	Positive	Not Available	Not Available	NX	T2	Stage IV	M1	NO	Not Available	Exemestane;Not Available	Not Applicable;Unknown	Not Available;Not Available		Positive	Not Available	Positive	Not Available	Negative	Not Available	Not Available	Alive	WITH TUMOR	0	304	0	304
TCGA-A8-A07Z-01A-11R-A00Z-07	Tumor	Yes	No	FEMALE	Not Available	85	Post (prior bilateral ovariectomy OR >12 mo since LMP with no prior hysterectomy)	Left	Not Available	Infiltrating Ductal Carcinoma	No	Other	Not Available	Negative	Not Available	Not Available	N0	T2	Stage IIA	M0	NO	Not Available	Exemestane	Not Applicable	Not Available		Positive	Not Available	Positive	Not Available	Negative	Not Available	Not Available	Alive	TUMOR FREE	0	1371	0	1371
TCGA-A8-A081-01A-11R-A00Z-07	Tumor	Yes	No	FEMALE	Not Available	80	Post (prior bilateral ovariectomy OR >12 mo since LMP with no prior hysterectomy)	Right	Not Available	Infiltrating Ductal Carcinoma	No	Other	Not Available	Negative	Not Available	Not Available	N0	T2	Stage IIA	M0		Not Available					Positive	Not Available	Positive	Not Available	Negative	1+	Not Available	Alive	TUMOR FREE	0	0	0	0
TCGA-A8-A082-01A-11R-A00Z-07	Tumor	Yes	No	FEMALE	Not Available	58	Post (prior bilateral ovariectomy OR >12 mo since LMP with no prior hysterectomy)	Right	Not Available	Infiltrating Ductal Carcinoma	No	Other	Not Available	Negative	Not Available	Not Available	N1a	T2	Stage IIB	M0	NO	Not Available	5-Fluorouracil;Epirubicin;Cyclophosphamide;Docetaxel;Letrozole;Exemestane	Complete Response;Complete Response;Complete Response;Complete Response;Not Applicable;Complete Response	Not Available;Not Available;Not Available;Not Available;Not Available;Not Available		Positive	Not Available	Positive	Not Available	Negative	1+	Not Available	Alive	TUMOR FREE	0	549	0	549
TCGA-A8-A083-01A-21R-A00Z-07	Tumor	Yes	No	FEMALE	Not Available	67	Post (prior bilateral ovariectomy OR >12 mo since LMP with no prior hysterectomy)	Left	Not Available	Infiltrating Ductal Carcinoma	No	Other	Not Available	Negative	Not Available	Not Available	N0	T3	Stage IIB	M0		Not Available					Positive	Not Available	Positive	Not Available	Negative	1+	Not Available	Alive	TUMOR FREE	0	0	0	0
TCGA-A8-A084-01A-21R-A00Z-07	Tumor	No	No	FEMALE	Not Available	81	Post (prior bilateral ovariectomy OR >12 mo since LMP with no prior hysterectomy)	Left	Not Available	Infiltrating Ductal Carcinoma	Yes	Other	Not Available	Positive	Not Available	Not Available	N1a	T2	Stage IIB	M0	YES	Not Available					Positive	Not Available	Negative	Not Available	Negative	1+	Not Available	Alive	WITH TUMOR	0	458	0	458
TCGA-A8-A085-01A-11R-A00Z-07	Tumor	No	No	MALE	Not Available	44	Pre	Left	Not Available	Infiltrating Ductal Carcinoma	No	Other	Not Available	Negative	Not Available	Not Available	N1a	T2	Stage IIB	M0	NO	Not Available	Tamoxifen	Not Applicable	Not Available		Positive	Not Available	Positive	Not Available	Negative	1+	Not Available	Alive	TUMOR FREE	0	1124	0	1124
TCGA-A8-A086-01A-11R-A00Z-07	Tumor	Yes	No	FEMALE	Not Available	59	Post (prior bilateral ovariectomy OR >12 mo since LMP with no prior hysterectomy)	Right	Not Available	Infiltrating Ductal Carcinoma	No	Other	Not Available	Negative	Not Available	Not Available	N1a	T1c	Stage IIA	M0	YES	Not Available	Docetaxel;Cyclophosphamide	Complete Response;Complete Response	Not Available;Not Available		Positive	Not Available	Positive	Not Available	Negative	0	Not Available	Alive	TUMOR FREE	0	396	0	396
TCGA-A8-A08A-01A-11R-A32Y-07	Tumor	Yes	No	FEMALE	Not Available	89	Post (prior bilateral ovariectomy OR >12 mo since LMP with no prior hysterectomy)	Left Upper Inner Quadrant	Not Available	Infiltrating Ductal Carcinoma	No	Other	Not Available	Negative	Not Available	Not Available	N0	T1c	Stage I	M0		Not Available					Positive	Not Available	Positive	Not Available	Negative	1+	Not Available	Alive	TUMOR FREE	0	30	0	30
TCGA-A8-A08B-01A-11R-A00Z-07	Tumor	Yes	No	FEMALE	Not Available	52	Pre (<6 months since LMP AND no prior bilateral ovariectomy AND not on estrogen replacement)	Right Upper Inner Quadrant	Not Available	Infiltrating Ductal Carcinoma	No	Other	Not Available	Negative	Not Available	Not Available	N0	T2	Stage IIA	M0	YES	Not Available	5-Fluorouracil;Epirubicin;Cyclophosphamide;Tamoxifen;Trastuzumab;Letrozole	Complete Response;Complete Response;Complete Response;Complete Response;Complete Response;Not Applicable	Not Available;Not Available;Not Available;Not Available;Not Available;Not Available	Her-2	Positive	Not Available	Negative	Not Available	Positive	3+	Not Available	Alive	TUMOR FREE	0	1156	0	1156
TCGA-A8-A08C-01A-11R-A00Z-07	Tumor	Yes	No	FEMALE	Not Available	65	Post (prior bilateral ovariectomy OR >12 mo since LMP with no prior hysterectomy)	Left Upper Inner Quadrant	Not Available	Infiltrating Ductal Carcinoma	No	Other	Not Available	Negative	Not Available	Not Available	N0	T2	Stage IIA	M0	YES	Not Available	5-Fluorouracil;Epirubicin;Cyclophosphamide;Tamoxifen	Complete Response;Complete Response;Complete Response;Not Applicable	Not Available;Not Available;Not Available;Not Available	Her-2	Positive	Not Available	Positive	Not Available	Positive	2+	Not Available	Alive	TUMOR FREE	0	881	0	881
TCGA-A8-A08F-01A-11R-A00Z-07	Tumor	No	No	FEMALE	Not Available	59	Post (prior bilateral ovariectomy OR >12 mo since LMP with no prior hysterectomy)	Right Upper Inner Quadrant	Not Available	Infiltrating Ductal Carcinoma	Yes	Other	Not Available	Negative	Not Available	Not Available	N3a	T2	Stage IIIC	M0	YES	Not Available	5-Fluorouracil;Epirubicin;Cyclophosphamide;Docetaxel;Letrozole	Complete Response;Complete Response;Complete Response;Complete Response;Not Applicable	Not Available;Not Available;Not Available;Not Available;Not Available		Positive	Not Available	Positive	Not Available	Negative	1+	Not Available	Alive	TUMOR FREE	0	1004	0	1004
TCGA-A8-A08G-01A-11R-A00Z-07	Tumor	Yes	No	FEMALE	Not Available	41	Pre (<6 months since LMP AND no prior bilateral ovariectomy AND not on estrogen replacement)	Left Upper Inner Quadrant	Not Available	Infiltrating Ductal Carcinoma	No	Other	Not Available	Negative	Not Available	Not Available	N0	T2	Stage IIA	M0	YES	Not Available	5-Fluorouracil;Epirubicin;Cyclophosphamide;Docetaxel;Exemestane	Complete Response;Complete Response;Complete Response;Complete Response;Not Applicable	Not Available;Not Available;Not Available;Not Available;Not Available	Her-2	Positive	Not Available	Positive	Not Available	Positive	3+	Not Available	Alive	TUMOR FREE	0	607	0	607
TCGA-A8-A08H-01A-21R-A00Z-07	Tumor	Yes	No	FEMALE	Not Available	66	Post (prior bilateral ovariectomy OR >12 mo since LMP with no prior hysterectomy)	Left Upper Inner Quadrant	Not Available	Infiltrating Ductal Carcinoma	No	Other	Not Available	Negative	Not Available	Not Available	N0	T2	Stage IIA	M0		Not Available				Her-2	Positive	Not Available	Positive	Not Available	Positive	3+	Not Available	Alive	TUMOR FREE	0	0	0	0
TCGA-A8-A08I-01A-11R-A00Z-07	Tumor	Yes	No	FEMALE	Not Available	53	Post (prior bilateral ovariectomy OR >12 mo since LMP with no prior hysterectomy)	Right Upper Inner Quadrant	Not Available	Infiltrating Ductal Carcinoma	No	Other	Not Available	Negative	Not Available	Not Available	N0	T2	Stage IIA	M0	YES	Not Available	5-Fluorouracil;Epirubicin;Cyclophosphamide;Letrozole	Complete Response;Complete Response;Complete Response;Not Applicable	Not Available;Not Available;Not Available;Not Available		Positive	Not Available	Positive	Not Available	Negative	1+	Not Available	Alive	TUMOR FREE	0	365	0	365
TCGA-A8-A08J-01A-11R-A00Z-07	Tumor	Yes	No	FEMALE	Not Available	52	Post (prior bilateral ovariectomy OR >12 mo since LMP with no prior hysterectomy)	Right	Not Available	Infiltrating Ductal Carcinoma	No	Other	Not Available	Positive	Not Available	Not Available	N3	T4b	Stage IV	M1	NO	Not Available					Positive	Not Available	Negative	Not Available	Negative	1+	Not Available	Dead	WITH TUMOR	1	1127	1	1127
TCGA-A8-A08L-01A-11R-A00Z-07	Tumor	Yes	No	FEMALE	Not Available	89	Post (prior bilateral ovariectomy OR >12 mo since LMP with no prior hysterectomy)	Left	Not Available	Infiltrating Ductal Carcinoma	No	Other	Not Available	Negative	Not Available	Not Available	N2a	T3	Stage IIIA	M0	YES	Not Available					Positive	Not Available	Negative	Not Available	Negative	1+	Not Available	Dead	TUMOR FREE	1	304	0	304
TCGA-A8-A08O-01A-21R-A056-07	Tumor	Yes	No	FEMALE	Not Available	45	Pre (<6 months since LMP AND no prior bilateral ovariectomy AND not on estrogen replacement)	Right	Not Available	Infiltrating Ductal Carcinoma	No	Other	Not Available	Positive	Not Available	Not Available	N3a	T2	Stage IV	M1	NO	Not Available	Docetaxel;Vinorelbine;Anastrozole;Tamoxifen;Bevacizumab;Ibandronate	Clinical Progressive Disease;Clinical Progressive Disease;Clinical Progressive Disease;Not Applicable;Clinical Progressive Disease;Not Applicable	Not Available;Not Available;Not Available;Not Available;Not Available;Not Available		Positive	Not Available	Positive	Not Available	Negative	1+	Not Available	Alive	WITH TUMOR	0	943	1	762	762	1
TCGA-A8-A08P-01A-11R-A00Z-07	Tumor	Yes	No	FEMALE	Not Available	70	Post (prior bilateral ovariectomy OR >12 mo since LMP with no prior hysterectomy)	Right	Not Available	Infiltrating Ductal Carcinoma	No	Other	Not Available	Negative	Not Available	Not Available	N2a	T2	Stage IIIA	M0	YES	Not Available	5-Fluorouracil;Doxorubicin;Cyclophosphamide;Docetaxel;Exemestane;Trastuzumab	Complete Response;Complete Response;Complete Response;Complete Response;Not Applicable;Complete Response	Not Available;Not Available;Not Available;Not Available;Not Available;Not Available	Her-2	Positive	Not Available	Positive	Not Available	Positive	3+	Not Available	Alive	TUMOR FREE	0	943	0	943
TCGA-A8-A08R-01A-11R-A034-07	Tumor	Yes	No	FEMALE	Not Available	52	Post (prior bilateral ovariectomy OR >12 mo since LMP with no prior hysterectomy)	Left	Not Available	Infiltrating Ductal Carcinoma	No	Other	Not Available	Negative	Not Available	Not Available	N1a	T2	Stage IIB	M0		Not Available				TNBC	Negative	Not Available	Negative	Not Available	Negative	1+	Not Available	Alive	TUMOR FREE	0	30	0	30
TCGA-A8-A08S-01A-11R-A034-07	Tumor	No	No	FEMALE	Not Available	71	Post (prior bilateral ovariectomy OR >12 mo since LMP with no prior hysterectomy)	Left	Not Available	Infiltrating Ductal Carcinoma	Yes	Other	Not Available	Negative	Not Available	Not Available	N1	T1c	Stage IIA	M0	YES	Not Available	Anastrozole	Not Applicable	Not Available	Her-2	Positive	Not Available	Positive	Not Available	Positive	3+	Not Available	Alive	TUMOR FREE	0	1004	0	1004
TCGA-A8-A08T-01A-21R-A00Z-07	Tumor	Yes	No	FEMALE	Not Available	64	Post (prior bilateral ovariectomy OR >12 mo since LMP with no prior hysterectomy)	Right	Not Available	Infiltrating Ductal Carcinoma	No	Other	Not Available	Positive	Not Available	Not Available	N1a	T2	Stage IV	M1	NO	Not Available				Her-2	Positive	Not Available	Positive	Not Available	Positive	2+	Not Available	Alive	WITH TUMOR	1	3409	1	2557	2557	1
TCGA-A8-A08X-01A-21R-A00Z-07	Tumor	Yes	No	FEMALE	Not Available	43	Pre (<6 months since LMP AND no prior bilateral ovariectomy AND not on estrogen replacement)	Left	Not Available	Infiltrating Ductal Carcinoma	No	Other	Not Available	Negative	Not Available	Not Available	N3a	T4d	Stage IIIC	M0	YES	Not Available	Doxorubicin;Cyclophosphamide;Paclitaxel;Trastuzumab;Vinorelbine;Tamoxifen	Complete Response;Complete Response;Complete Response;Complete Response;Complete Response;Not Applicable	Not Available;Not Available;Not Available;Not Available;Not Available;Not Available	Her-2	Negative	Not Available	Negative	Not Available	Positive	3+	Not Available	Alive	TUMOR FREE	0	1308	1	366	366	1
TCGA-A8-A08Z-01A-21R-A00Z-07	Tumor	Yes	No	FEMALE	Not Available	76	Post (prior bilateral ovariectomy OR >12 mo since LMP with no prior hysterectomy)	Left	Not Available	Infiltrating Ductal Carcinoma	No	Other	Not Available	Negative	Not Available	Not Available	N3a	T4b	Discrepancy	M0		Not Available					Positive	Not Available	Positive	Not Available	Negative	1+	Not Available	Alive	TUMOR FREE	0	1217	0	1217
TCGA-A8-A090-01A-11R-A00Z-07	Tumor	Yes	No	FEMALE	Not Available	74	Post (prior bilateral ovariectomy OR >12 mo since LMP with no prior hysterectomy)	Right	Not Available	Infiltrating Ductal Carcinoma	No	Other	Not Available	Negative	Not Available	Not Available	N0	T2	Stage IIA	M0		Not Available				Her-2	Positive	Not Available	Positive	Not Available	Positive	2+	Not Available	Alive	TUMOR FREE	0	0	0	0
TCGA-A8-A091-01A-11R-A00Z-07	Tumor	Yes	No	FEMALE	Not Available	61	Post (prior bilateral ovariectomy OR >12 mo since LMP with no prior hysterectomy)	Right	Not Available	Infiltrating Ductal Carcinoma	No	Other	Not Available	Negative	Not Available	Not Available	N0	T2	Stage IIA	M0	YES	Not Available	5-Fluorouracil;Epirubicin;Cyclophosphamide;Tamoxifen;Letrozole;Zoledronic acid;Pamidronate	Unknown;Unknown;Unknown;Stable Disease;Not Applicable;Not Applicable;Stable Disease	Not Available;Not Available;Not Available;Not Available;Not Available;Not Available;Not Available		Positive	Not Available	Negative	Not Available	Negative	1+	Not Available	Alive	TUMOR FREE	0	1004	1	243	243	1
TCGA-A8-A092-01A-11R-A00Z-07	Tumor	Yes	No	FEMALE	Not Available	48	Pre (<6 months since LMP AND no prior bilateral ovariectomy AND not on estrogen replacement)	Left	Not Available	Infiltrating Ductal Carcinoma	No	Other	Not Available	Negative	Not Available	Not Available	N2a	T2	Stage IIIA	M0	YES	Not Available	Paclitaxel;Epirubicin;Cyclophosphamide;Tamoxifen	Complete Response;Complete Response;Complete Response;Not Applicable	Not Available;Not Available;Not Available;Not Available		Positive	Not Available	Positive	Not Available	Negative	1+	Not Available	Alive	TUMOR FREE	0	942	0	942
TCGA-A8-A093-01A-11R-A00Z-07	Tumor	Yes	No	FEMALE	Not Available	61	Post (prior bilateral ovariectomy OR >12 mo since LMP with no prior hysterectomy)	Right	Not Available	Infiltrating Ductal Carcinoma	No	Other	Not Available	Negative	Not Available	Not Available	N0	T2	Stage IIA	M0	YES	Not Available	Tamoxifen	Not Applicable	Not Available		Positive	Not Available	Positive	Not Available	Negative	1+	Not Available	Alive	TUMOR FREE	0	546	0	546
TCGA-A8-A094-01A-11R-A00Z-07	Tumor	Yes	No	FEMALE	Not Available	75	Post (prior bilateral ovariectomy OR >12 mo since LMP with no prior hysterectomy)	Left	Not Available	Infiltrating Ductal Carcinoma	No	Other	Not Available	Negative	Not Available	Not Available	N0	T2	Stage IIA	M0		Not Available					Positive	Not Available	Negative	Not Available	Negative	1+	Not Available	Alive	TUMOR FREE	0	0	0	0
TCGA-A8-A095-01A-11R-A00Z-07	Tumor	Yes	No	FEMALE	Not Available	45	Pre (<6 months since LMP AND no prior bilateral ovariectomy AND not on estrogen replacement)	Left	Not Available	Infiltrating Ductal Carcinoma	No	Other	Not Available	Negative	Not Available	Not Available	N0	T1c	Stage I	M0	YES	Not Available	5-Fluorouracil;Doxorubicin;Cyclophosphamide;Tamoxifen	Complete Response;Complete Response;Complete Response;Not Applicable	Not Available;Not Available;Not Available;Not Available		Positive	Not Available	Positive	Not Available	Negative	1+	Not Available	Alive	TUMOR FREE	0	1277	0	1277
TCGA-A8-A096-01A-11R-A00Z-07	Tumor	Yes	No	FEMALE	Not Available	73	Post (prior bilateral ovariectomy OR >12 mo since LMP with no prior hysterectomy)	Right	Not Available	Infiltrating Ductal Carcinoma	No	Other	Not Available	Negative	Not Available	Not Available	N0	T2	Stage IIA	M0		Not Available					Positive	Not Available	Positive	Not Available	Negative	1+	Not Available	Alive	TUMOR FREE	0	0	0	0
TCGA-A8-A097-01A-11R-A034-07	Tumor	Yes	No	FEMALE	Not Available	65	Post (prior bilateral ovariectomy OR >12 mo since LMP with no prior hysterectomy)	Left	Not Available	Infiltrating Ductal Carcinoma	No	Other	Not Available	Negative	Not Available	Not Available	N1	T2	Stage IIB	M0	YES	Not Available	Docetaxel;Cyclophosphamide;Tamoxifen	Complete Response;Complete Response;Not Applicable	Not Available;Not Available;Not Available	Her-2	Positive	Not Available	Positive	Not Available	Positive	2+	Not Available	Alive	TUMOR FREE	0	365	0	365
TCGA-A8-A099-01A-11R-A00Z-07	Tumor	Yes	No	FEMALE	Not Available	76	Post (prior bilateral ovariectomy OR >12 mo since LMP with no prior hysterectomy)	Right	Not Available	Infiltrating Ductal Carcinoma	No	Other	Not Available	Not Available	Not Available	Not Available	N3a	T4b	Stage X	MX	YES	Not Available	Exemestane	Not Applicable	Not Available	Her-2	Positive	Not Available	Positive	Not Available	Positive	3+	Not Available	Alive		0	304	0	304
TCGA-A8-A09A-01A-11R-A00Z-07	Tumor	Yes	No	FEMALE	Not Available	40	Pre (<6 months since LMP AND no prior bilateral ovariectomy AND not on estrogen replacement)	Left	Not Available	Infiltrating Ductal Carcinoma	No	Other	Not Available	Positive	Not Available	Not Available	NX	T2	Stage X	M0	YES	Not Available	5-Fluorouracil;Epirubicin;Cyclophosphamide;Docetaxel;Tamoxifen	Unknown;Unknown;Unknown;Unknown;Not Applicable	Not Available;Not Available;Not Available;Not Available;Not Available		Positive	Not Available	Positive	Not Available	Negative	1+	Not Available	Alive	WITH TUMOR	0	304	0	304
TCGA-A8-A09B-01A-11R-A00Z-07	Tumor	Yes	No	FEMALE	Not Available	58	Post (prior bilateral ovariectomy OR >12 mo since LMP with no prior hysterectomy)	Left	Not Available	Infiltrating Ductal Carcinoma	No	Other	Not Available	Negative	Not Available	Not Available	N1a	T4b	Stage IIIB	M0	YES	Not Available	5-Fluorouracil;Epirubicin;Cyclophosphamide;Docetaxel;Anastrozole	Unknown;Unknown;Unknown;Unknown;Unknown	Not Available;Not Available;Not Available;Not Available;Not Available		Positive	Not Available	Positive	Not Available	Negative	Not Available	Not Available	Alive	TUMOR FREE	0	365	0	365
TCGA-A8-A09D-01A-11R-A00Z-07	Tumor	Yes	No	FEMALE	Not Available	47	Post (prior bilateral ovariectomy OR >12 mo since LMP with no prior hysterectomy)	Right Lower Outer Quadrant	Not Available	Infiltrating Ductal Carcinoma	No	Other	Not Available	Negative	Not Available	Not Available	N1	T2	Stage IIB	M0	YES	Not Available	Doxorubicin;Cyclophosphamide;Paclitaxel;Tamoxifen;Anastrozole	Complete Response;Complete Response;Complete Response;Complete Response;Not Applicable	Not Available;Not Available;Not Available;Not Available;Not Available		Positive	Not Available	Positive	Not Available	Negative	1+	Not Available	Alive	TUMOR FREE	0	1522	0	1522
TCGA-A8-A09E-01A-11R-A00Z-07	Tumor	No	No	FEMALE	Not Available	73	Post (prior bilateral ovariectomy OR >12 mo since LMP with no prior hysterectomy)	Left Lower Outer Quadrant	Not Available	Infiltrating Ductal Carcinoma	Yes	Other	Not Available	Positive	Not Available	Not Available	N1a	T4b	Stage IIIB	M0	YES	Not Available	Anastrozole	Not Applicable	Not Available	Her-2	Positive	Not Available	Positive	Not Available	Positive	2+	Not Available	Alive	WITH TUMOR	0	1492	0	1492
TCGA-A8-A09G-01A-21R-A00Z-07	Tumor	Yes	No	FEMALE	Not Available	79	Post (prior bilateral ovariectomy OR >12 mo since LMP with no prior hysterectomy)	Right Lower Outer Quadrant	Not Available	Infiltrating Ductal Carcinoma	No	Other	Not Available	Negative	Not Available	Not Available	N3a	T3	Stage IIIC	M0		Not Available				Her-2	Positive	Not Available	Negative	Not Available	Positive	2+	Not Available	Alive	TUMOR FREE	0	0	0	0
TCGA-A8-A09I-01A-22R-A034-07	Tumor	Yes	No	FEMALE	Not Available	84	Post (prior bilateral ovariectomy OR >12 mo since LMP with no prior hysterectomy)	Right Lower Outer Quadrant	Not Available	Infiltrating Ductal Carcinoma	No	Other	Not Available	Negative	Not Available	Not Available	N0	T2	Stage IIA	M0	NO	Not Available	Anastrozole	Not Applicable	Not Available	Her-2	Positive	Not Available	Positive	Not Available	Positive	3+	Not Available	Alive	TUMOR FREE	0	1371	0	1371
TCGA-A8-A09K-01A-11R-A00Z-07	Tumor	No	No	FEMALE	Not Available	68	Post (prior bilateral ovariectomy OR >12 mo since LMP with no prior hysterectomy)	Left Lower Outer Quadrant	Not Available	Infiltrating Ductal Carcinoma	Yes	Other	Not Available	Negative	Not Available	Not Available	N1	T1c	Stage IIA	M0	NO	Not Available					Positive	Not Available	Positive	Not Available	Negative	0	Not Available	Alive	TUMOR FREE	0	912	0	912
TCGA-A8-A09M-01A-11R-A00Z-07	Tumor	Yes	No	FEMALE	Not Available	75	Post (prior bilateral ovariectomy OR >12 mo since LMP with no prior hysterectomy)	Right Lower Outer Quadrant	Not Available	Infiltrating Ductal Carcinoma	No	Other	Not Available	Negative	Not Available	Not Available	N3a	T2	Stage IIIC	M0	YES	Not Available	Paclitaxel;Exemestane	Complete Response;Not Applicable	Not Available;Not Available		Positive	Not Available	Positive	Not Available	Negative	1+	Not Available	Alive	TUMOR FREE	0	1006	0	1006
TCGA-A8-A09N-01A-11R-A00Z-07	Tumor	Yes	No	FEMALE	Not Available	57	Post (prior bilateral ovariectomy OR >12 mo since LMP with no prior hysterectomy)	Right Lower Outer Quadrant	Not Available	Infiltrating Ductal Carcinoma	No	Other	Not Available	Negative	Not Available	Not Available	N3a	T2	Stage IIIC	M0		Not Available				Her-2	Positive	Not Available	Positive	Not Available	Positive	3+	Not Available	Alive	TUMOR FREE	0	31	0	31
TCGA-A8-A09Q-01A-11R-A00Z-07	Tumor	Yes	No	FEMALE	Not Available	83	Post (prior bilateral ovariectomy OR >12 mo since LMP with no prior hysterectomy)	Left Lower Inner Quadrant	Not Available	Infiltrating Ductal Carcinoma	No	Other	Not Available	Positive	Not Available	Not Available	N2a	T4b	Stage IIIB	M0	NO	Not Available	Anastrozole	Not Applicable	Not Available		Positive	Not Available	Positive	Not Available	Negative	Not Available	Not Available	Alive	WITH TUMOR	0	761	0	761
TCGA-A8-A09R-01A-11R-A00Z-07	Tumor	Yes	No	FEMALE	Not Available	82	Post (prior bilateral ovariectomy OR >12 mo since LMP with no prior hysterectomy)	Left Lower Inner Quadrant	Not Available	Infiltrating Ductal Carcinoma	No	Other	Not Available	Negative	Not Available	Not Available	N1	T2	Stage IIB	M0	YES	Not Available	Letrozole	Not Applicable	Not Available		Positive	Not Available	Positive	Not Available	Negative	1+	Not Available	Alive	TUMOR FREE	0	273	0	273
TCGA-A8-A09T-01A-11R-A00Z-07	Tumor	Yes	No	FEMALE	Not Available	68	Post (prior bilateral ovariectomy OR >12 mo since LMP with no prior hysterectomy)	Left	Not Available	Infiltrating Lobular Carcinoma	No	Other	Not Available	Negative	Not Available	Not Available	N0	T1c	Discrepancy	MX	YES	Not Available	Anastrozole	Not Applicable	Not Available		Positive	Not Available	Positive	Not Available	Negative	Not Available	Not Available	Alive	TUMOR FREE	0	579	0	579
TCGA-A8-A09V-01A-11R-A034-07	Tumor	Yes	No	FEMALE	Not Available	51	Pre (<6 months since LMP AND no prior bilateral ovariectomy AND not on estrogen replacement)	Right Upper Inner Quadrant	Not Available	Infiltrating Lobular Carcinoma	No	Other	Not Available	Negative	Not Available	Not Available	N0	T2	Stage IIA	M0	YES	Not Available	Tamoxifen	Not Applicable	Not Available		Positive	Not Available	Positive	Not Available	Negative	0	Not Available	Alive	TUMOR FREE	0	457	0	457
TCGA-A8-A09W-01A-11R-A00Z-07	Tumor	Yes	No	FEMALE	Not Available	70	Post (prior bilateral ovariectomy OR >12 mo since LMP with no prior hysterectomy)	Right Upper Inner Quadrant	Not Available	Infiltrating Lobular Carcinoma	No	Other	Not Available	Not Available	Not Available	Not Available	N3	T2	Stage IIIB	M0		Not Available					Positive	Not Available	Positive	Not Available	Negative	0	Not Available	Alive		0	30	0	30
TCGA-A8-A09X-01A-11R-A00Z-07	Tumor	Yes	No	FEMALE	Not Available	62	Post (prior bilateral ovariectomy OR >12 mo since LMP with no prior hysterectomy)	Left Upper Inner Quadrant	Not Available	Infiltrating Lobular Carcinoma	No	Other	Not Available	Not Available	Not Available	Not Available	N3a	T2	Stage IIIC	M0		Not Available				TNBC	Negative	Not Available	Negative	Not Available	Negative	1+	Not Available	Dead		1	426	0	426
TCGA-A8-A09Z-01A-11R-A00Z-07	Tumor	Yes	No	FEMALE	Not Available	83	Post (prior bilateral ovariectomy OR >12 mo since LMP with no prior hysterectomy)	Right	Not Available	Infiltrating Lobular Carcinoma	No	Other	Not Available	Positive	Not Available	Not Available	N0	T3	Stage IIB	M0		Not Available					Positive	Not Available	Negative	Not Available	Negative	1+	Not Available	Alive	WITH TUMOR	0	0	0	0
TCGA-A8-A0A1-01A-11R-A00Z-07	Tumor	Yes	No	FEMALE	Not Available	84	Post (prior bilateral ovariectomy OR >12 mo since LMP with no prior hysterectomy)	Right	Not Available	Infiltrating Lobular Carcinoma	No	Other	Not Available	Negative	Not Available	Not Available	N0	T2	Stage IIA	M0		Not Available	Tamoxifen	Not Applicable	Not Available		Positive	Not Available	Positive	Not Available	Negative	Not Available	Not Available	Alive	TUMOR FREE	0	365	0	365
TCGA-A8-A0A2-01A-11R-A034-07	Tumor	Yes	No	FEMALE	Not Available	66	Post (prior bilateral ovariectomy OR >12 mo since LMP with no prior hysterectomy)	Right Lower Outer Quadrant	Not Available	Infiltrating Lobular Carcinoma	No	Other	Not Available	Negative	Not Available	Not Available	N0	T2	Stage IIA	M0		Not Available	Tamoxifen	Not Applicable	Not Available		Positive	Not Available	Positive	Not Available	Negative	0	Not Available	Alive	TUMOR FREE	0	579	0	579
TCGA-A8-A0A4-01A-11R-A00Z-07	Tumor	Yes	No	FEMALE	Not Available	73	Post (prior bilateral ovariectomy OR >12 mo since LMP with no prior hysterectomy)	Left	Not Available	Infiltrating Lobular Carcinoma	No	Other	Not Available	Negative	Not Available	Not Available	N0	T2	Stage IIA	M0	NO	Not Available	Tamoxifen;Letrozole	Complete Response;Not Applicable	Not Available;Not Available		Positive	Not Available	Positive	Not Available	Negative	Not Available	Not Available	Alive	TUMOR FREE	0	396	0	396
TCGA-A8-A0A6-01A-12R-A056-07	Tumor	Yes	No	FEMALE	Not Available	64	Post (prior bilateral ovariectomy OR >12 mo since LMP with no prior hysterectomy)	Left Upper Outer Quadrant	Not Available	Infiltrating Lobular Carcinoma	No	Other	Not Available	Negative	Not Available	Not Available	N3a	T2	Stage IIIC	M0	YES	Not Available	Epirubicin;Cyclophosphamide;Exemestane;Anastrozole;Zoledronic acid	Complete Response;Complete Response;Complete Response;Not Applicable;Not Applicable	Not Available;Not Available;Not Available;Not Available;Not Available		Positive	Not Available	Positive	Not Available	Negative	1+	Not Available	Alive	TUMOR FREE	0	640	0	640
TCGA-A8-A0A7-01A-11R-A00Z-07	Tumor	Yes	No	FEMALE	Not Available	57	Post (prior bilateral ovariectomy OR >12 mo since LMP with no prior hysterectomy)	Right Upper Outer Quadrant	Not Available	Infiltrating Lobular Carcinoma	No	Other	Not Available	Negative	Not Available	Not Available	N1a	T2	Stage IIB	M0		Not Available				Her-2	Negative	Not Available	Negative	Not Available	Positive	3+	Not Available	Alive	TUMOR FREE	0	30	0	30
TCGA-A8-A0A9-01A-11R-A00Z-07	Tumor	Yes	No	FEMALE	Not Available	80	Post (prior bilateral ovariectomy OR >12 mo since LMP with no prior hysterectomy)	Left Upper Outer Quadrant	Not Available	Infiltrating Ductal Carcinoma	No	Other	Not Available	Negative	Not Available	Not Available	N0	T2	Stage IIA	M0	YES	Not Available	Anastrozole	Not Applicable	Not Available		Positive	Not Available	Positive	Not Available	Negative	Not Available	Not Available	Alive	TUMOR FREE	0	822	0	822
TCGA-A8-A0AB-01A-11R-A034-07	Tumor	Yes	No	FEMALE	Not Available	54	Post (prior bilateral ovariectomy OR >12 mo since LMP with no prior hysterectomy)	Left Upper Outer Quadrant	Not Available	Infiltrating Lobular Carcinoma	No	Other	Not Available	Negative	Not Available	Not Available	N0	T2	Stage IIA	M0	NO	Not Available	5-Fluorouracil;Doxorubicin;Cyclophosphamide;Tamoxifen	Complete Response;Complete Response;Complete Response;Not Applicable	Not Available;Not Available;Not Available;Not Available	Her-2	Positive	Not Available	Positive	Not Available	Positive	2+	Not Available	Alive	TUMOR FREE	0	518	0	518
TCGA-A8-A0AD-01A-11R-A056-07	Tumor	Yes	No	FEMALE	Not Available	83	Post (prior bilateral ovariectomy OR >12 mo since LMP with no prior hysterectomy)	Right Upper Outer Quadrant	Not Available	Mixed Histology (please specify)	No	Other	Not Available	Negative	Not Available	Not Available	N0	T1c	Stage I	M0	NO	Not Available	Tamoxifen	Not Applicable	Not Available		Positive	Not Available	Positive	Not Available	Negative	1+	Not Available	Alive	TUMOR FREE	0	1157	0	1157
TCGA-AC-A23C-01A-12R-A169-07	Tumor	Yes	No	FEMALE	WHITE	62	Post (prior bilateral ovariectomy OR >12 mo since LMP with no prior hysterectomy)	Left	Core needle biopsy	Infiltrating Ductal Carcinoma	No	Modified Radical Mastectomy	Not Available	Negative	1	1	N1	T2	Stage IIB	MX	NO	Not Available	Chemo, NOS	Complete Response	Not Available	Her-2	Positive	90-99%	Positive	50-59%	Positive	Not Available	Not Available	Alive	TUMOR FREE	0	585	0	585
TCGA-AC-A23E-01A-11R-A157-07	Tumor	Yes	No	FEMALE	WHITE	50	Peri (6-12 months since last menstrual period)	Right	Core needle biopsy	Infiltrating Ductal Carcinoma	No	Modified Radical Mastectomy	Sentinel node biopsy alone	Negative	2	1	N1	T2	Stage IIB	MX	YES	Not Available	Tamoxifen	Not Applicable	Not Available		Positive	30-39%	Positive	80-89%	Negative	Not Available	Not Available	Alive	TUMOR FREE	0	698	0	698
TCGA-AC-A23G-01A-11R-A213-07	Tumor	Yes	No	FEMALE	WHITE	76	Post (prior bilateral ovariectomy OR >12 mo since LMP with no prior hysterectomy)	Right Upper Inner Quadrant	Core needle biopsy	Infiltrating Lobular Carcinoma	No	Other	Not Available	Negative	8	2	N1	T1c	Stage IIA	MX	NO	Not Available	Cytoxan;Adriamycin;Taxol;Arimidex	Complete Response;Complete Response;Complete Response;Complete Response	Not Available;Not Available;Not Available;Not Available	Her-2	Positive	90-99%	Positive	80-89%	Positive	Not Available	Not Available	Alive	TUMOR FREE	0	2248	0	2248
TCGA-AC-A23H-01A-11R-A157-07	Tumor	Yes	No	FEMALE	WHITE	90	Post (prior bilateral ovariectomy OR >12 mo since LMP with no prior hysterectomy)	Right Upper Inner Quadrant;Right Lower Inner Quadrant	Core needle biopsy	Infiltrating Ductal Carcinoma	No	Simple Mastectomy	Not Available	Negative	Not Available	Not Available	NX	T2	Stage IIA	M0	NO	Not Available				Her-2	Positive	10-19%	Negative	Not Available	Positive	Not Available	Not Available	Alive	WITH TUMOR	1	174	1	174
TCGA-AC-A23H-11A-12R-A157-07	Normal	Yes	No	FEMALE	WHITE	90	Post (prior bilateral ovariectomy OR >12 mo since LMP with no prior hysterectomy)	Right Upper Inner Quadrant;Right Lower Inner Quadrant	Core needle biopsy	Infiltrating Ductal Carcinoma	No	Simple Mastectomy	Not Available	Negative	Not Available	Not Available	NX	T2	Stage IIA	M0	NO	Not Available				Her-2	Positive	10-19%	Negative	Not Available	Positive	Not Available	Not Available	Alive	WITH TUMOR	1	174	1	174
TCGA-AC-A2B8-01A-11R-A17B-07	Tumor	Yes	No	FEMALE	WHITE	84	Post (prior bilateral ovariectomy OR >12 mo since LMP with no prior hysterectomy)	Right	Core needle biopsy	Infiltrating Lobular Carcinoma	No	Simple Mastectomy	Axillary lymph node dissection alone	Negative	1	0	N0 (i-)	T3	Stage IIB	M0	YES	Not Available	Chemo, NOS;Arimidex	Complete Response;Not Applicable	Not Available;Not Available		Positive	90-99%	Positive	90-99%	Negative	Not Available	Not Available	Alive	TUMOR FREE	0	677	1	654	654	1	New Primary Tumor	Other, specify
TCGA-AC-A2BK-01A-11R-A21T-07	Tumor	Yes	No	FEMALE	BLACK OR AFRICAN AMERICAN	78	Post (prior bilateral ovariectomy OR >12 mo since LMP with no prior hysterectomy)	Left Upper Outer Quadrant	Core needle biopsy	Infiltrating Ductal Carcinoma	No	Modified Radical Mastectomy	Axillary lymph node dissection alone	Negative	23	6	N2a	T2	Stage IIIA	MX	YES	Not Available	Cytoxan;Adriamycin;Taxol;Avastin	Complete Response;Complete Response;Complete Response;Complete Response	Not Available;Not Available;Not Available;Not Available	TNBC	Negative	Not Available	Negative	Not Available	Negative	Not Available	Not Available	Alive	TUMOR FREE	0	2222	0	2222
TCGA-AC-A2BM-01A-11R-A21T-07	Tumor	Yes	No	FEMALE	BLACK OR AFRICAN AMERICAN	41	Pre	Left Upper Inner Quadrant	Tumor resection	Infiltrating Ductal Carcinoma	No	Modified Radical Mastectomy	Sentinel lymph node biopsy plus axillary dissection	Negative	13	1	N1a	T2	Stage IIB	MX	NO	Not Available					Positive	60-69%	Positive	10-19%	Negative	Not Available	Not Available	Alive	TUMOR FREE	0	3022	0	3022
TCGA-AC-A2FB-01A-11R-A17B-07	Tumor	Yes	No	FEMALE	WHITE	65	Post	Left Upper Inner Quadrant	Core needle biopsy	Infiltrating Lobular Carcinoma	No	Simple Mastectomy	Sentinel node biopsy alone	Negative	1	0	N0	T2	Stage IIA	MX	NO	Not Available	Taxotere;Herceptin;Arimidex	Complete Response;Complete Response;Complete Response	Not Available;Not Available;Not Available	Her-2	Positive	90-99%	Positive	<10%	Positive	3+	Not Available	Alive	TUMOR FREE	0	1234	0	1234
TCGA-AC-A2FB-11A-13R-A17B-07	Normal	Yes	No	FEMALE	WHITE	65	Post	Left Upper Inner Quadrant	Core needle biopsy	Infiltrating Lobular Carcinoma	No	Simple Mastectomy	Sentinel node biopsy alone	Negative	1	0	N0	T2	Stage IIA	MX	NO	Not Available	Taxotere;Herceptin;Arimidex	Complete Response;Complete Response;Complete Response	Not Available;Not Available;Not Available	Her-2	Positive	90-99%	Positive	<10%	Positive	3+	Not Available	Alive	TUMOR FREE	0	1234	0	1234
TCGA-AC-A2FE-01A-11R-A19W-07	Tumor	Yes	No	FEMALE	WHITE	62	Post (prior bilateral ovariectomy OR >12 mo since LMP with no prior hysterectomy)	Right Upper Outer Quadrant	Fine needle aspiration biopsy	Infiltrating Lobular Carcinoma	No	Modified Radical Mastectomy	Sentinel lymph node biopsy plus axillary dissection	Negative	18	18	N3a	T3	Stage IIIC	MX	YES;Not Available	YES	Adriamycin;Taxol;Arimidex;Cytoxan;Xeloda;Abraxane	Partial Response;Partial Response;Not Available;Complete Response;Clinical Progressive Disease;Clinical Progressive Disease	Not Available;Not Available;Not Available;Not Available;Not Available;Not Available		Positive	60-69%	Positive	<10%	Negative	Not Available	Not Available	Alive	WITH TUMOR	1	2636	1	766	766	1	Distant Metastasis	Bone;Liver
TCGA-AC-A2FF-01A-11R-A17B-07	Tumor	Yes	No	FEMALE	ASIAN	40	Pre	Right	Core needle biopsy	Infiltrating Lobular Carcinoma	No	Lumpectomy	Sentinel lymph node biopsy plus axillary dissection	Negative	7	3	N1	T2	Stage IIB	MX	YES;YES	Not Available	Cytoxan;Adriamycin;Taxol;Tamoxifen	Complete Response;Complete Response;Complete Response;Complete Response	Not Available;Not Available;Not Available;Not Available		Positive	30-39%	Positive	70-79%	Negative	Not Available	1.7	Alive	TUMOR FREE	0	2759	0	2759
TCGA-AC-A2FF-11A-13R-A17B-07	Normal	Yes	No	FEMALE	ASIAN	40	Pre	Right	Core needle biopsy	Infiltrating Lobular Carcinoma	No	Lumpectomy	Sentinel lymph node biopsy plus axillary dissection	Negative	7	3	N1	T2	Stage IIB	MX	YES;YES	Not Available	Cytoxan;Adriamycin;Taxol;Tamoxifen	Complete Response;Complete Response;Complete Response;Complete Response	Not Available;Not Available;Not Available;Not Available		Positive	30-39%	Positive	70-79%	Negative	Not Available	1.7	Alive	TUMOR FREE	0	2759	0	2759
TCGA-AC-A2FG-01A-11R-A17B-07	Tumor	Yes	No	FEMALE	WHITE	79	Post (prior bilateral ovariectomy OR >12 mo since LMP with no prior hysterectomy)	Left Upper Outer Quadrant	Core needle biopsy	Infiltrating Lobular Carcinoma	No	Modified Radical Mastectomy	Sentinel lymph node biopsy plus axillary dissection	Negative	11	1	N1a	T2	Stage IIB	MX	NO	Not Available	Arimidex	Complete Response	Not Available		Positive	90-99%	Negative	Not Available	Negative	Not Available	Not Available	Alive	TUMOR FREE	0	1853	0	1853
TCGA-AC-A2FK-01A-12R-A180-07	Tumor	Yes	No	FEMALE	WHITE	45	Pre	Left Upper Outer Quadrant	Core needle biopsy	Infiltrating Lobular Carcinoma	No	Modified Radical Mastectomy	Not Available	Negative	3	3	N3a	T2	Stage IIIC	M0	YES	Not Available	Cytoxan;Adriamycin;Femara;Taxotere	Complete Response;Complete Response;Complete Response;Complete Response	Not Available;Not Available;Not Available;Not Available		Positive	90-99%	Positive	90-99%	Negative	Not Available	Not Available	Alive	TUMOR FREE	0	2650	0	2650
TCGA-AC-A2FM-01A-11R-A19W-07	Tumor	Yes	No	FEMALE	WHITE	87	Post (prior bilateral ovariectomy OR >12 mo since LMP with no prior hysterectomy)	Right Upper Inner Quadrant	Core needle biopsy	Infiltrating Lobular Carcinoma	No	Modified Radical Mastectomy	Sentinel node biopsy alone	Negative	2	0	N1mi	T2	Stage IIB	M0	NO	Not Available				TNBC	Negative	Not Available	Negative	Not Available	Negative	Not Available	Not Available	Dead	WITH TUMOR	1	792	1	780	780	1	Distant Metastasis	Other, specify
TCGA-AC-A2FM-11B-32R-A19W-07	Normal	Yes	No	FEMALE	WHITE	87	Post (prior bilateral ovariectomy OR >12 mo since LMP with no prior hysterectomy)	Right Upper Inner Quadrant	Core needle biopsy	Infiltrating Lobular Carcinoma	No	Modified Radical Mastectomy	Sentinel node biopsy alone	Negative	2	0	N1mi	T2	Stage IIB	M0	NO	Not Available				TNBC	Negative	Not Available	Negative	Not Available	Negative	Not Available	Not Available	Dead	WITH TUMOR	1	792	1	780	780	1	Distant Metastasis	Other, specify
TCGA-AC-A2FO-01A-11R-A180-07	Tumor	Yes	No	FEMALE	WHITE	65	Post (prior bilateral ovariectomy OR >12 mo since LMP with no prior hysterectomy)	Left Upper Outer Quadrant	Core needle biopsy	Infiltrating Lobular Carcinoma	No	Simple Mastectomy	Other (specify)	Negative	10	2	N1	T2	Stage IIB	MX	NO	Not Available	Chemo, NOS;Hormone, NOS	Complete Response;Complete Response	Not Available;Not Available		Positive	90-99%	Negative	Not Available	Negative	Not Available	Not Available	Alive	TUMOR FREE	0	2255	0	2255
TCGA-AC-A2QH-01B-04R-A22O-07	Tumor	Yes	No	FEMALE	WHITE	58	Post (prior bilateral ovariectomy OR >12 mo since LMP with no prior hysterectomy)	Right Upper Outer Quadrant	Core needle biopsy	Metaplastic Carcinoma	No	Modified Radical Mastectomy	Axillary lymph node dissection alone	Negative	22	0	N0	T3	Stage IIB	MX	YES	Not Available	Cytoxan;Adriamycin;Aloxi	Complete Response;Complete Response;Complete Response	Not Available;Not Available;Not Available	TNBC	Negative	Not Available	Negative	Not Available	Negative	Not Available	Not Available	Alive	TUMOR FREE	0	1005	0	1005
TCGA-AC-A2QI-01A-12R-A19W-07	Tumor	Yes	No	FEMALE	WHITE	76	Post (prior bilateral ovariectomy OR >12 mo since LMP with no prior hysterectomy)	Right	Core needle biopsy	Infiltrating Lobular Carcinoma	No	Other	Sentinel node biopsy alone	Negative	2	2	N1a	T3	Stage IIIA	MX	YES	Not Available	Cytoxan;5-FU;Methotrexate	Complete Response;Complete Response;Complete Response	Not Available;Not Available;Not Available		Positive	90-99%	Negative	Not Available	Negative	1+	Not Available	Alive	TUMOR FREE	0	588	0	588
TCGA-AC-A2QJ-01A-12R-A19W-07	Tumor	Yes	No	FEMALE	WHITE	48	Pre	Left Upper Outer Quadrant;Left Lower Outer Quadrant	Core needle biopsy	Metaplastic Carcinoma	No	Other	Other (specify)	Negative	2	0	N0	T4b	Stage IIIB	M0	YES	Not Available	Cytoxan;Adriamycin;Abraxane;Gemzar;Carboplatin;Faslodex	Clinical Progressive Disease;Clinical Progressive Disease;Clinical Progressive Disease;Clinical Progressive Disease;Clinical Progressive Disease;Clinical Progressive Disease	Not Available;Not Available;Not Available;Not Available;Not Available;Not Available	TNBC	Negative	Not Available	Negative	Not Available	Negative	Not Available	Not Available	Alive	WITH TUMOR	1	446	1	237	237	1	Distant Metastasis	Bone
TCGA-AC-A3BB-01A-21R-A19W-07	Tumor	Yes	No	FEMALE	BLACK OR AFRICAN AMERICAN	46	Pre	Right Upper Outer Quadrant	Core needle biopsy	Infiltrating Lobular Carcinoma	No	Modified Radical Mastectomy	Axillary lymph node dissection alone	Negative	14	5	N2a	T3	Stage IIIA	MX	YES	Not Available	Cytoxan;Adriamycin;Taxotere	Complete Response;Complete Response;Complete Response	Not Available;Not Available;Not Available		Positive	90-99%	Positive	90-99%	Negative	Not Available	Not Available	Alive	TUMOR FREE	0	987	0	987
TCGA-AC-A3EH-01A-22R-A22K-07	Tumor	Yes	No	FEMALE	WHITE	79	Post (prior bilateral ovariectomy OR >12 mo since LMP with no prior hysterectomy)	Right	Excisional Biopsy	Infiltrating Lobular Carcinoma	No	Modified Radical Mastectomy	Axillary lymph node dissection alone	Negative	12	12	N3	T3	Stage IIIC	M0	NO	Unknown					Positive	Not Available	Negative	Not Available	Negative	Not Available	Not Available	Alive	TUMOR FREE	1	197	0	197
TCGA-AC-A3HN-01A-11R-A213-07	Tumor	Yes	No	FEMALE	WHITE	87	Post (prior bilateral ovariectomy OR >12 mo since LMP with no prior hysterectomy)	Left Upper Inner Quadrant	Core needle biopsy	Infiltrating Lobular Carcinoma	No	Simple Mastectomy	Sentinel node biopsy alone	Negative	3	2	N1a	T2	Stage IIB	MX	NO	Not Available					Positive	90-99%	Positive	<10%	Negative	Not Available	Not Available	Alive	TUMOR FREE	0	496	0	496
TCGA-AC-A3OD-01B-06R-A22O-07	Tumor	Yes	No	FEMALE	WHITE	68	Post (prior bilateral ovariectomy OR >12 mo since LMP with no prior hysterectomy)	Left	Core needle biopsy	Infiltrating Lobular Carcinoma	No	Modified Radical Mastectomy	Sentinel lymph node biopsy plus axillary dissection	Negative	3	1	N1mi	T2	Stage IIB	MX	YES	Not Available					Positive	90-99%	Positive	90-99%	Negative	1+	Not Available	Alive	TUMOR FREE	0	451	0	451
TCGA-AC-A3QP-01A-11R-A22U-07	Tumor	Yes	No	FEMALE	WHITE	79	Post (prior bilateral ovariectomy OR >12 mo since LMP with no prior hysterectomy)	Right	Core needle biopsy	Infiltrating Lobular Carcinoma	No	Lumpectomy	Sentinel node biopsy alone	Negative	2	1	N1mi	T2	Stage IIB	MX	YES	Not Available	Femara	Not Applicable	Not Available		Positive	70-79%	Positive	90-99%	Negative	2+	1.2	Alive	TUMOR FREE	0	675	0	675
TCGA-AC-A3QQ-01B-06R-A22O-07	Tumor	Yes	No	FEMALE	WHITE	54	Peri (6-12 months since last menstrual period)	Right	Core needle biopsy	Infiltrating Lobular Carcinoma	No	Other	Sentinel node biopsy alone	Close	5	0	N0 (i-)	T1c	Stage IA	MX	NO	Unknown				Her-2	Positive	90-99%	Positive	70-79%	Positive	3+	Not Available	Alive	TUMOR FREE	0	734	0	734
TCGA-AC-A3TM-01A-11R-A22K-07	Tumor	Yes	No	FEMALE	WHITE	50	Peri (6-12 months since last menstrual period)	Right	Core needle biopsy	Infiltrating Lobular Carcinoma	No	Simple Mastectomy	Sentinel node biopsy alone	Negative	4	2	N1mi	T3	Stage IIIA	M0	YES	Not Available	Cytoxan;Taxotere;Not Available;Arimidex	Complete Response;Complete Response;Complete Response;Not Applicable	Not Available;Not Available;Not Available;Not Available		Positive	90-99%	Positive	90-99%	Negative	2+	1.9	Alive	TUMOR FREE	0	762	0	762
TCGA-AC-A3TN-01A-11R-A22K-07	Tumor	Yes	No	FEMALE	WHITE	75	Post (prior bilateral ovariectomy OR >12 mo since LMP with no prior hysterectomy)	Right	Other method, specify:	Infiltrating Lobular Carcinoma	No	Simple Mastectomy	Sentinel lymph node biopsy plus axillary dissection	Negative	2	0	N0	T3	Stage IIB	MX	YES	Not Available	Arimidex	Not Applicable	Not Available	Her-2	Positive	90-99%	Positive	80-89%	Positive	Not Available	Not Available	Alive	TUMOR FREE	0	456	0	456
TCGA-AC-A3W5-01A-11R-A22K-07	Tumor	Yes	No	FEMALE	BLACK OR AFRICAN AMERICAN	65	Post	Right	Core needle biopsy	Infiltrating Lobular Carcinoma	No	Lumpectomy	Sentinel node biopsy alone	Close	3	0	N0	T2	Stage IIA	MX	YES	Unknown	Docetaxel;Cyclophosphamide;Herceptin;Letrozole	Complete Response;Complete Response;Complete Response;Not Applicable	Not Available;Not Available;Not Available;Not Available		Positive	50-59%	Positive	30-39%	Negative	Not Available	Not Available	Alive	TUMOR FREE	0	504	0	504
TCGA-AC-A3W6-01A-12R-A22K-07	Tumor	Yes	No	FEMALE	WHITE	90	Post (prior bilateral ovariectomy OR >12 mo since LMP with no prior hysterectomy)	Right	Core needle biopsy	Infiltrating Lobular Carcinoma	No	Modified Radical Mastectomy	Sentinel node biopsy alone	Negative	3	3	N1	T3	Stage IIIA	MX	NO	Unknown					Positive	90-99%	Positive	20-29%	Negative	3+	Not Available	Alive	TUMOR FREE	0	602	0	602
TCGA-AC-A3W7-01A-11R-A22K-07	Tumor	Yes	No	FEMALE	WHITE	66	Post (prior bilateral ovariectomy OR >12 mo since LMP with no prior hysterectomy)	Right Upper Outer Quadrant	Core needle biopsy	Infiltrating Lobular Carcinoma	No	Simple Mastectomy	Sentinel node biopsy alone	Negative	2	1	N1a	T2	Stage IIB	MX	NO	Unknown	Femara	Not Applicable	Not Available		Positive	90-99%	Negative	<10%	Negative	Not Available	Not Available	Alive	TUMOR FREE	0	471	0	471
TCGA-AC-A3YI-01A-21R-A239-07	Tumor	Yes	No	FEMALE	WHITE	74	Post (prior bilateral ovariectomy OR >12 mo since LMP with no prior hysterectomy)	Right	Core needle biopsy	Infiltrating Lobular Carcinoma	No	Lumpectomy	Sentinel lymph node biopsy plus axillary dissection	Negative	13	12	N3a	T1c	Stage IIIC	MX	YES	Unknown	Cytoxan;Methotrexate;5-FU	Complete Response;Complete Response;Complete Response	Not Available;Not Available;Not Available	Her-2	Positive	90-99%	Positive	20-29%	Positive	1+	Not Available	Alive	TUMOR FREE	0	707	0	707
TCGA-AC-A3YJ-01A-11R-A22U-07	Tumor	Yes	No	FEMALE	WHITE	66	Post (prior bilateral ovariectomy OR >12 mo since LMP with no prior hysterectomy)	Right	Core needle biopsy	Other, specify	No	Modified Radical Mastectomy	Sentinel node biopsy alone	Negative	1	0	N0 (i-)	T2	Stage IIA	MX	NO	Unknown	Arimidex;Femara	Unknown;Not Applicable	Not Available;Not Available		Positive	Not Available	Positive	Not Available	Negative	Not Available	Not Available	Alive	TUMOR FREE	0	754	0	754
TCGA-AC-A4ZE-01A-11R-A41B-07	Tumor	Yes	No	FEMALE	WHITE	63	Post (prior bilateral ovariectomy OR >12 mo since LMP with no prior hysterectomy)	Right Lower Outer Quadrant	Core needle biopsy	Infiltrating Lobular Carcinoma	No	Simple Mastectomy	Sentinel node biopsy alone	Negative	1	0	N0	T3	Stage IIB	M0	NO	NO				Her-2	Positive	Not Available	Positive	Not Available	Positive	Not Available	Not Available	Alive	TUMOR FREE	0	890	0	890
TCGA-AC-A5EH-01A-11R-A28M-07	Tumor	Yes	No	FEMALE	BLACK OR AFRICAN AMERICAN	76	Post	Left Upper Outer Quadrant	Core needle biopsy	Infiltrating Ductal Carcinoma	No	Modified Radical Mastectomy	Axillary lymph node dissection alone	Negative	14	1	N1mi	T2	Stage IIB	MX	YES	Unknown					Positive	20-29%	Negative	Not Available	Negative	Not Available	Not Available	Alive	TUMOR FREE	0	511	0	511
TCGA-AC-A5XS-01A-11R-A29R-07	Tumor	Yes	No	FEMALE	WHITE	74	Post	Left Upper Inner Quadrant	Core needle biopsy	Infiltrating Lobular Carcinoma	No	Simple Mastectomy	Sentinel node biopsy alone	Negative	8	0	N0	T2	Stage IIA	MX	NO	Unknown	Femara	Not Applicable	Not Available		Positive	Not Available	Positive	Not Available	Negative	Not Available	Not Available	Alive	TUMOR FREE	0	588	0	588
TCGA-AC-A5XU-01A-11R-A28M-07	Tumor	Yes	No	FEMALE	BLACK OR AFRICAN AMERICAN	74	Post	Left Upper Outer Quadrant	Core needle biopsy	Infiltrating Ductal Carcinoma	No	Lumpectomy	Sentinel node biopsy alone	Negative	2	0	N0 (i-)	T3	Stage IIB	MX	YES	Unknown	Letrozole	Not Applicable	Not Available		Positive	90-99%	Positive	60-69%	Negative	Not Available	Not Available	Alive	TUMOR FREE	0	455	0	455
TCGA-AC-A62V-01A-11R-A31O-07	Tumor	No	No	MALE	BLACK OR AFRICAN AMERICAN	58	Post	Right Lower Outer Quadrant	Core needle biopsy	Infiltrating Ductal Carcinoma	No	Modified Radical Mastectomy	Axillary lymph node dissection alone	Negative	17	3	N1a	T2	Stage IV	M1	YES	Unknown	Denosumab;Paclitaxel	Partial Response;Partial Response	Not Available;Not Available		Positive	90-99%	Positive	<10%	Negative	Not Available	Not Available	Alive	WITH TUMOR	1	348	1	348
TCGA-AC-A62X-01A-11R-A29R-07	Tumor	Yes	No	FEMALE	BLACK OR AFRICAN AMERICAN	72	Post (prior bilateral ovariectomy OR >12 mo since LMP with no prior hysterectomy)	Left Upper Inner Quadrant	Core needle biopsy	Infiltrating Ductal Carcinoma	No	Modified Radical Mastectomy	Axillary lymph node dissection alone	Negative	10	0	N0	T2	Stage IIA	MX	NO	Unknown					Positive	<10%	Negative	Not Available	Negative	Not Available	Not Available	Alive	TUMOR FREE	0	417	0	417
TCGA-AC-A62Y-01A-11R-A29R-07	Tumor	Yes	No	FEMALE	WHITE	79	Post (prior bilateral ovariectomy OR >12 mo since LMP with no prior hysterectomy)	Right	Core needle biopsy	Infiltrating Lobular Carcinoma	No	Modified Radical Mastectomy	Sentinel node biopsy alone	Positive	1	1	N1	T2	Stage IIB	MX	YES	Unknown					Positive	90-99%	Positive	80-89%	Negative	1+	Not Available	Alive	TUMOR FREE	0	530	0	530
TCGA-AC-A6IV-01A-12R-A33J-07	Tumor	Yes	No	FEMALE	WHITE	47	Pre	Right	Core needle biopsy	Infiltrating Lobular Carcinoma	No	Modified Radical Mastectomy	Sentinel node biopsy alone	Negative	1	1	N1	T2	Stage IIB	MX	YES	Unknown					Positive	90-99%	Positive	60-69%	Negative	2+	Not Available	Alive	TUMOR FREE	0	568	0	568
TCGA-AC-A6IW-01A-12R-A33J-07	Tumor	Yes	No	FEMALE	BLACK OR AFRICAN AMERICAN	73	Post (prior bilateral ovariectomy OR >12 mo since LMP with no prior hysterectomy)	Left Upper Outer Quadrant	Core needle biopsy	Infiltrating Ductal Carcinoma	No	Simple Mastectomy	Sentinel node biopsy alone	Negative	2	0	N0 (i-)	T2	Stage IIA	MX	NO	Unknown				TNBC	Negative	<10%	Negative	<10%	Negative	Not Available	Not Available	Alive	TUMOR FREE	0	413	0	413
TCGA-AC-A6IX-01A-12R-A32P-07	Tumor	Yes	No	FEMALE	WHITE	49	Pre	Left Upper Outer Quadrant	Core needle biopsy	Infiltrating Lobular Carcinoma	No	Modified Radical Mastectomy	Axillary lymph node dissection alone	Negative	21	19	N3a	T2	Stage IIIC	MX	YES	Unknown					Positive	90-99%	Positive	<10%	Negative	Not Available	Not Available	Alive	TUMOR FREE	0	373	0	373
TCGA-AC-A6IX-06A-11R-A32P-07	Tumor	Yes	Yes	FEMALE	WHITE	49	Pre	Left Upper Outer Quadrant	Core needle biopsy	Infiltrating Lobular Carcinoma	No	Modified Radical Mastectomy	Axillary lymph node dissection alone	Negative	21	19	N3a	T2	Stage IIIC	MX	YES	Unknown					Positive	90-99%	Positive	<10%	Negative	Not Available	Not Available	Alive	TUMOR FREE	0	373	0	373
TCGA-AC-A6NO-01A-12R-A33J-07	Tumor	Yes	No	FEMALE	BLACK OR AFRICAN AMERICAN	43	Pre	Right	Fine needle aspiration biopsy	Infiltrating Ductal Carcinoma	No	Modified Radical Mastectomy	Axillary lymph node dissection alone	Negative	16	2	N1a	T2	Stage IIB	MX		Unknown					Positive	Not Available	Positive	Not Available	Negative	Not Available	Not Available	Alive	TUMOR FREE	0	51	0	51
TCGA-AC-A7VB-01A-11R-A352-07	Tumor	Yes	No	FEMALE	BLACK OR AFRICAN AMERICAN	51	Unknown	Right Lower Outer Quadrant	Core needle biopsy	Infiltrating Ductal Carcinoma	No	Modified Radical Mastectomy	Sentinel lymph node biopsy plus axillary dissection	Negative	15	3	N1a	T1c	Stage IIA	MX	YES	Unknown					Positive	80-89%	Negative	<10%	Negative	Not Available	Not Available	Alive	TUMOR FREE	0	250	0	250
TCGA-AC-A7VC-01A-11R-A352-07	Tumor	Yes	No	FEMALE	WHITE	56	Post (prior bilateral ovariectomy OR >12 mo since LMP with no prior hysterectomy)	Left	Tumor resection	Metaplastic Carcinoma	No	Simple Mastectomy	Sentinel node biopsy alone	Negative	1	0	N0	T3	Stage IIB	MX		Unknown				TNBC	Negative	Not Available	Negative	Not Available	Negative	Not Available	Not Available	Alive	TUMOR FREE	0	1	0	1
TCGA-AC-A8OP-01A-11R-A36F-07	Tumor	Yes	No	FEMALE	BLACK OR AFRICAN AMERICAN	72	Post (prior bilateral ovariectomy OR >12 mo since LMP with no prior hysterectomy)	Right Lower Inner Quadrant	Core needle biopsy	Infiltrating Ductal Carcinoma	No	Simple Mastectomy	Sentinel node biopsy alone	Negative	6	0	N0 (i-)	T1c	Stage IA	MX	NO	Unknown					Positive	90-99%	Positive	10-19%	Negative	1+	Not Available	Alive	TUMOR FREE	0	614	0	614
TCGA-AC-A8OQ-01A-11R-A41B-07	Tumor	Yes	No	FEMALE	BLACK OR AFRICAN AMERICAN	72	Post (prior bilateral ovariectomy OR >12 mo since LMP with no prior hysterectomy)	Right Upper Outer Quadrant	Core needle biopsy	Infiltrating Ductal Carcinoma	No	Lumpectomy	Sentinel node biopsy alone	Negative	2	1	N1a	T2	Stage IIB	MX		Unknown				TNBC	Negative	Not Available	Negative	Not Available	Negative	Not Available	Not Available	Alive	TUMOR FREE	0	34	0	34
TCGA-AC-A8OR-01A-21R-A41B-07	Tumor	Yes	No	FEMALE	WHITE	75	Post (prior bilateral ovariectomy OR >12 mo since LMP with no prior hysterectomy)	Left	Core needle biopsy	Mucinous Carcinoma	No	Simple Mastectomy	Sentinel node biopsy alone	Negative	2	0	N0 (i-)	T1c	Stage IA	MX		Unknown					Positive	90-99%	Positive	90-99%	Negative	Not Available	Not Available	Alive	TUMOR FREE	0	40	0	40
TCGA-AC-A8OS-01A-12R-A41B-07	Tumor	Yes	No	FEMALE	WHITE	71	Post (prior bilateral ovariectomy OR >12 mo since LMP with no prior hysterectomy)	Right Upper Outer Quadrant	Core needle biopsy	Infiltrating Lobular Carcinoma	No	Simple Mastectomy	Sentinel node biopsy alone	Negative	2	0	N0 (i-)	T2	Stage IIA	MX		Unknown				Her-2	Positive	90-99%	Positive	<10%	Positive	1+	Not Available	Alive	TUMOR FREE	0	70	0	70
TCGA-AN-A03X-01A-21R-A00Z-07	Tumor	Yes	No	FEMALE	WHITE	74	Post (prior bilateral ovariectomy OR >12 mo since LMP with no prior hysterectomy)	Left Upper Outer Quadrant	Tumor resection	Infiltrating Ductal Carcinoma	No	Modified Radical Mastectomy	No axillary staging	Negative	19	0	N0	T2	Stage IIA	M0	NO	Not Available				Her-2	Positive	Not Available	Positive	Not Available	Positive	1+	Not Available	Alive	TUMOR FREE	0	10	0	10
TCGA-AN-A03Y-01A-21R-A00Z-07	Tumor	Yes	No	FEMALE	WHITE	66	Post (prior bilateral ovariectomy OR >12 mo since LMP with no prior hysterectomy)	Left Upper Outer Quadrant	Tumor resection	Infiltrating Ductal Carcinoma	No	Modified Radical Mastectomy	No axillary staging	Negative	9	0	N0	T2	Stage IIA	M0	NO	Not Available					Positive	Not Available	Positive	Not Available	Negative	0	Not Available	Alive	TUMOR FREE	0	10	0	10
TCGA-AN-A041-01A-11R-A034-07	Tumor	Yes	No	FEMALE	WHITE	29	Pre (<6 months since LMP AND no prior bilateral ovariectomy AND not on estrogen replacement)	Left Upper Outer Quadrant	Tumor resection	Infiltrating Ductal Carcinoma	No	Not Available	Not Available	Negative	18	1	N1a	T2	Stage IIB	M0	NO	Not Available				Her-2	Positive	Not Available	Negative	Not Available	Positive	2+	Not Available	Alive	TUMOR FREE	0	7	0	7
TCGA-AN-A046-01A-21R-A034-07	Tumor	Yes	No	FEMALE	WHITE	68	Post (prior bilateral ovariectomy OR >12 mo since LMP with no prior hysterectomy)	Right Lower Inner Quadrant	Tumor resection	Infiltrating Ductal Carcinoma	No	Modified Radical Mastectomy	No axillary staging	Negative	19	0	N0	T2	Stage IIA	M0	NO	Not Available					Positive	Not Available	Positive	Not Available	Negative	Not Available	Not Available	Alive	TUMOR FREE	0	10	0	10
TCGA-AN-A049-01A-21R-A00Z-07	Tumor	Yes	No	FEMALE	WHITE	62	Post (prior bilateral ovariectomy OR >12 mo since LMP with no prior hysterectomy)	Left Upper Outer Quadrant	Tumor resection	Infiltrating Ductal Carcinoma	No	Simple Mastectomy	No axillary staging	Positive	9	0	N0	T2	Stage IIA	M0	Unknown	Not Available					Positive	Not Available	Positive	Not Available	Negative	0	Not Available	Alive	TUMOR FREE	0	19	0	19
TCGA-AN-A04A-01A-21R-A034-07	Tumor	Yes	No	FEMALE	WHITE	36	Pre	Left Lower Inner Quadrant;Left Lower Outer Quadrant	Tumor resection	Infiltrating Ductal Carcinoma	No	Simple Mastectomy	No axillary staging	Positive	7	4	N2	T2	Stage IIIA	M0	Unknown	Not Available					Positive	Not Available	Positive	Not Available	Negative	0	Not Available	Alive	TUMOR FREE	0	90	0	90
TCGA-AN-A04C-01A-21R-A034-07	Tumor	Yes	No	FEMALE	WHITE	51	Post (prior bilateral ovariectomy OR >12 mo since LMP with no prior hysterectomy)	Left Upper Outer Quadrant	Tumor resection	Infiltrating Ductal Carcinoma	No	Simple Mastectomy	Axillary lymph node dissection alone	Positive	15	2	N1	T2	Stage IIB	M0	Unknown	Not Available				Her-2	Negative	Not Available	Negative	Not Available	Positive	3+	Not Available	Alive	TUMOR FREE	0	54	0	54
TCGA-AN-A04D-01A-21R-A034-07	Tumor	Yes	No	FEMALE	WHITE	58	Post (prior bilateral ovariectomy OR >12 mo since LMP with no prior hysterectomy)	Left Upper Outer Quadrant	Tumor resection	Infiltrating Ductal Carcinoma	No	Simple Mastectomy	No axillary staging	Positive	15	2	N1	T2	Stage IIB	M0	Unknown	Not Available				TNBC	Negative	Not Available	Negative	Not Available	Negative	0	Not Available	Alive	TUMOR FREE	0	52	0	52
TCGA-AN-A0AJ-01A-11R-A00Z-07	Tumor	Yes	No	FEMALE	WHITE	79	Post (prior bilateral ovariectomy OR >12 mo since LMP with no prior hysterectomy)	Left Upper Outer Quadrant	Tumor resection	Infiltrating Ductal Carcinoma	No	Modified Radical Mastectomy	Axillary lymph node dissection alone	Negative	9	0	N0	T3	Stage IIB	M0	NO	Not Available				Her-2	Positive	80-89%	Positive	40-49%	Positive	3+	Not Available	Alive	TUMOR FREE	0	303	0	303
TCGA-AN-A0AK-01A-21R-A00Z-07	Tumor	Yes	No	FEMALE	WHITE	76	Post (prior bilateral ovariectomy OR >12 mo since LMP with no prior hysterectomy)	Left Upper Outer Quadrant	Tumor resection	Infiltrating Ductal Carcinoma	No	Modified Radical Mastectomy	Axillary lymph node dissection alone	Negative	11	0	N0	T2	Stage IIA	M0	NO	Not Available				Her-2	Positive	80-89%	Negative	<10%	Positive	2+	Not Available	Alive	TUMOR FREE	0	224	0	224
TCGA-AN-A0AL-01A-11R-A00Z-07	Tumor	Yes	No	FEMALE	WHITE	41	Pre (<6 months since LMP AND no prior bilateral ovariectomy AND not on estrogen replacement)	Left Lower Outer Quadrant	Tumor resection	Infiltrating Ductal Carcinoma	No	Modified Radical Mastectomy	Axillary lymph node dissection alone	Negative	5	0	N0	T4	Stage IIIB	M0	NO	Not Available				TNBC	Negative	<10%	Negative	<10%	Negative	0	Not Available	Alive	TUMOR FREE	0	227	0	227
TCGA-AN-A0AM-01A-11R-A034-07	Tumor	Yes	No	FEMALE	WHITE	56	Post (prior bilateral ovariectomy OR >12 mo since LMP with no prior hysterectomy)	Left Upper Outer Quadrant	Tumor resection	Infiltrating Ductal Carcinoma	No	Modified Radical Mastectomy	No axillary staging	Negative	20	0	N0	T2	Stage IIA	M0	NO	Not Available					Positive	Not Available	Negative	Not Available	Negative	Not Available	Not Available	Alive	TUMOR FREE	0	5	0	5
TCGA-AN-A0AR-01A-11R-A00Z-07	Tumor	Yes	No	FEMALE	WHITE	55	Pre (<6 months since LMP AND no prior bilateral ovariectomy AND not on estrogen replacement)	Right Upper Inner Quadrant	Tumor resection	Infiltrating Ductal Carcinoma	No	Modified Radical Mastectomy	No axillary staging	Negative	17	0	N0	T2	Stage IIA	M0	NO	Not Available				TNBC	Negative	Not Available	Negative	Not Available	Negative	0	Not Available	Alive	TUMOR FREE	0	10	0	10
TCGA-AN-A0AS-01A-11R-A00Z-07	Tumor	Yes	No	FEMALE	WHITE	70	Post (prior bilateral ovariectomy OR >12 mo since LMP with no prior hysterectomy)	Left Upper Outer Quadrant	Tumor resection	Infiltrating Ductal Carcinoma	No	Modified Radical Mastectomy	No axillary staging	Negative	9	4	N2	T2	Stage IIIA	M0	NO	Not Available					Positive	Not Available	Negative	Not Available	Negative	0	Not Available	Alive	TUMOR FREE	0	10	0	10
TCGA-AN-A0AT-01A-11R-A034-07	Tumor	Yes	No	FEMALE	WHITE	62	Post (prior bilateral ovariectomy OR >12 mo since LMP with no prior hysterectomy)	Right Upper Inner Quadrant	Tumor resection	Infiltrating Ductal Carcinoma	No	Modified Radical Mastectomy	No axillary staging	Negative	10	0	N0	T2	Stage IIA	M0	NO	Not Available				TNBC	Negative	Not Available	Negative	Not Available	Negative	Not Available	Not Available	Alive	TUMOR FREE	0	10	0	10
TCGA-AN-A0FD-01A-11R-A034-07	Tumor	Yes	No	FEMALE	WHITE	71	Post (prior bilateral ovariectomy OR >12 mo since LMP with no prior hysterectomy)	Left Upper Outer Quadrant	Tumor resection	Infiltrating Ductal Carcinoma	No	Modified Radical Mastectomy	Axillary lymph node dissection alone	Negative	14	0	N0	T2	Stage IIA	M0	NO	Not Available				Her-2	Positive	80-89%	Positive	10-19%	Positive	2+	Not Available	Alive	TUMOR FREE	0	196	0	196
TCGA-AN-A0FF-01A-11R-A034-07	Tumor	Yes	No	FEMALE	WHITE	32	Pre (<6 months since LMP AND no prior bilateral ovariectomy AND not on estrogen replacement)	Left Upper Outer Quadrant	Tumor resection	Infiltrating Ductal Carcinoma	No	Modified Radical Mastectomy	Axillary lymph node dissection alone	Negative	14	0	N0	T1b	Stage IA	M0	NO	Not Available					Positive	90-99%	Positive	90-99%	Negative	0	Not Available	Alive	TUMOR FREE	0	172	0	172
TCGA-AN-A0FJ-01A-11R-A00Z-07	Tumor	Yes	No	FEMALE	WHITE	59	Post	Left Upper Outer Quadrant	Tumor resection	Infiltrating Ductal Carcinoma	No	Modified Radical Mastectomy	Axillary lymph node dissection alone	Negative	14	8	N2	T2	Stage IV	M1	NO	Not Available				Her-2	Positive	10-19%	Negative	<10%	Positive	1+	Not Available	Alive	TUMOR FREE	0	242	0	242
TCGA-AN-A0FK-01A-11R-A034-07	Tumor	Yes	No	FEMALE	WHITE	88	Post (prior bilateral ovariectomy OR >12 mo since LMP with no prior hysterectomy)	Right Lower Outer Quadrant	Tumor resection	Infiltrating Ductal Carcinoma	No	Modified Radical Mastectomy	Axillary lymph node dissection alone	Negative	7	0	N0	T4	Stage IIIB	M0	NO	Not Available				Her-2	Positive	90-99%	Positive	90-99%	Positive	1+	Not Available	Alive	TUMOR FREE	0	213	0	213
TCGA-AN-A0FL-01A-11R-A034-07	Tumor	Yes	No	FEMALE	WHITE	62	Post (prior bilateral ovariectomy OR >12 mo since LMP with no prior hysterectomy)	Left Upper Inner Quadrant	Tumor resection	Infiltrating Ductal Carcinoma	No	Modified Radical Mastectomy	Axillary lymph node dissection alone	Negative	8	0	N0	T2	Stage IIA	M0	NO	Not Available				Her-2	Negative	<10%	Negative	<10%	Positive	1+	Not Available	Alive	TUMOR FREE	0	231	0	231
TCGA-AN-A0FN-01A-11R-A034-07	Tumor	Yes	No	FEMALE	WHITE	61	Post (prior bilateral ovariectomy OR >12 mo since LMP with no prior hysterectomy)	Right Lower Outer Quadrant	Tumor resection	Infiltrating Lobular Carcinoma	No	Modified Radical Mastectomy	Axillary lymph node dissection alone	Negative	10	0	N0	T1c	Stage IA	M0	NO	Not Available				Her-2	Positive	90-99%	Positive	10-19%	Positive	1+	Not Available	Alive	TUMOR FREE	0	218	0	218
TCGA-AN-A0FS-01A-11R-A034-07	Tumor	Yes	No	FEMALE	WHITE	55	Peri (6-12 months since last menstrual period)	Right Lower Outer Quadrant	Tumor resection	Infiltrating Lobular Carcinoma	No	Modified Radical Mastectomy	Axillary lymph node dissection alone	Negative	14	0	N0	T1c	Stage IA	M0	NO	Not Available				Her-2	Positive	90-99%	Negative	<10%	Positive	1+	Not Available	Alive	TUMOR FREE	0	210	0	210
TCGA-AN-A0FT-01A-11R-A034-07	Tumor	Yes	No	FEMALE	WHITE	63	Post (prior bilateral ovariectomy OR >12 mo since LMP with no prior hysterectomy)	Right Lower Outer Quadrant	Tumor resection	Infiltrating Ductal Carcinoma	No	Modified Radical Mastectomy	Axillary lymph node dissection alone	Negative	7	1	N1	T2	Stage IIB	M0	NO	Not Available				Her-2	Positive	90-99%	Positive	90-99%	Positive	3+	Not Available	Alive	TUMOR FREE	0	214	0	214
TCGA-AN-A0FV-01A-11R-A00Z-07	Tumor	Yes	No	FEMALE	WHITE	58	Post (prior bilateral ovariectomy OR >12 mo since LMP with no prior hysterectomy)	Right Upper Outer Quadrant	Tumor resection	Infiltrating Ductal Carcinoma	No	Modified Radical Mastectomy	No axillary staging	Negative	12	0	N0	T2	Stage IIA	M0	NO	Not Available				Her-2	Negative	Not Available	Negative	Not Available	Positive	3+	Not Available	Alive	TUMOR FREE	0	10	0	10
TCGA-AN-A0FW-01A-11R-A034-07	Tumor	Yes	No	FEMALE	WHITE	67	Post (prior bilateral ovariectomy OR >12 mo since LMP with no prior hysterectomy)	Left Upper Outer Quadrant	Tumor resection	Infiltrating Ductal Carcinoma	No	Modified Radical Mastectomy	No axillary staging	Negative	14	2	N2	T2	Stage IIIA	M0	NO	Not Available					Positive	Not Available	Negative	Not Available	Negative	1+	Not Available	Alive	TUMOR FREE	0	11	0	11
TCGA-AN-A0FX-01A-11R-A034-07	Tumor	Yes	No	FEMALE	WHITE	52	Post (prior bilateral ovariectomy OR >12 mo since LMP with no prior hysterectomy)	Left Upper Outer Quadrant	Tumor resection	Infiltrating Ductal Carcinoma	No	Modified Radical Mastectomy	No axillary staging	Negative	12	0	N0	T2	Stage IIA	M0	NO	Not Available				Her-2	Negative	Not Available	Negative	Not Available	Positive	1+	Not Available	Alive	TUMOR FREE	0	10	0	10
TCGA-AN-A0FY-01A-11R-A034-07	Tumor	Yes	No	FEMALE	WHITE	55	Post (prior bilateral ovariectomy OR >12 mo since LMP with no prior hysterectomy)	Left Upper Outer Quadrant	Tumor resection	Infiltrating Ductal Carcinoma	No	Modified Radical Mastectomy	No axillary staging	Negative	11	0	N0	T1c	Stage IA	M0	NO	Not Available					Positive	Not Available	Positive	Not Available	Negative	0	Not Available	Alive	TUMOR FREE	0	10	0	10
TCGA-AN-A0FZ-01A-11R-A034-07	Tumor	Yes	No	FEMALE	WHITE	45	Pre (<6 months since LMP AND no prior bilateral ovariectomy AND not on estrogen replacement)	Left Upper Outer Quadrant	Tumor resection	Infiltrating Ductal Carcinoma	No	Modified Radical Mastectomy	No axillary staging	Negative	14	1	N2	T2	Stage IIIA	M0	NO	Not Available				Her-2	Positive	Not Available	Negative	Not Available	Positive	2+	Not Available	Alive	TUMOR FREE	0	10	0	10
TCGA-AN-A0G0-01A-11R-A034-07	Tumor	Yes	No	FEMALE	WHITE	56	Post (prior bilateral ovariectomy OR >12 mo since LMP with no prior hysterectomy)	Right Upper Inner Quadrant	Tumor resection	Infiltrating Ductal Carcinoma	No	Modified Radical Mastectomy	No axillary staging	Negative	23	0	N0	T2	Stage IIA	M0	YES	Not Available				TNBC	Negative	Not Available	Negative	Not Available	Negative	1+	Not Available	Alive	TUMOR FREE	0	16	0	16
TCGA-AN-A0XL-01A-11R-A10J-07	Tumor	Yes	No	FEMALE	WHITE	61	Post (prior bilateral ovariectomy OR >12 mo since LMP with no prior hysterectomy)	Left Upper Outer Quadrant	Tumor resection	Infiltrating Ductal Carcinoma	No	Not Available	Not Available	Negative	14	0	N0	T2	Stage IIA	M0	NO	Not Available					Positive	Not Available	Positive	Not Available	Negative	1+	Not Available	Alive	TUMOR FREE	0	163	0	163
TCGA-AN-A0XN-01A-21R-A109-07	Tumor	Yes	No	FEMALE	WHITE	68	Post (prior bilateral ovariectomy OR >12 mo since LMP with no prior hysterectomy)	Right Upper Inner Quadrant	Tumor resection	Infiltrating Ductal Carcinoma	No	Not Available	Not Available	Negative	15	1	N2	T2	Stage IIIA	M0	NO	Not Available					Negative	Not Available	Positive	Not Available	Negative	Not Available	Not Available	Alive	TUMOR FREE	0	10	0	10
TCGA-AN-A0XO-01A-11R-A109-07	Tumor	Yes	No	FEMALE	WHITE	59	Post (prior bilateral ovariectomy OR >12 mo since LMP with no prior hysterectomy)	Left Upper Outer Quadrant	Tumor resection	Infiltrating Ductal Carcinoma	No	Not Available	Not Available	Negative	12	2	N2	T2	Stage IIIA	M0	NO	Not Available					Positive	Not Available	Negative	Not Available	Negative	1+	Not Available	Alive	TUMOR FREE	0	375	0	375
TCGA-AN-A0XP-01A-11R-A109-07	Tumor	Yes	No	FEMALE	WHITE	69	Post (prior bilateral ovariectomy OR >12 mo since LMP with no prior hysterectomy)	Right Upper Inner Quadrant	Tumor resection	Infiltrating Ductal Carcinoma	No	Not Available	Not Available	Negative	19	1	N2	T2	Stage IIIA	M0	NO	Not Available				Her-2	Positive	Not Available	Positive	Not Available	Positive	2+	Not Available	Alive	TUMOR FREE	0	9	0	9
TCGA-AN-A0XR-01A-11R-A109-07	Tumor	Yes	No	FEMALE	WHITE	55	Post (prior bilateral ovariectomy OR >12 mo since LMP with no prior hysterectomy)	Left Upper Outer Quadrant	Tumor resection	Infiltrating Ductal Carcinoma	No	Not Available	Not Available	Negative	14	7	N2	T2	Stage IIIA	M0	NO	Not Available					Positive	Not Available	Negative	Not Available	Negative	Not Available	Not Available	Alive	TUMOR FREE	0	10	0	10
TCGA-AN-A0XS-01A-22R-A109-07	Tumor	Yes	No	FEMALE	WHITE	63	Post (prior bilateral ovariectomy OR >12 mo since LMP with no prior hysterectomy)	Left Upper Outer Quadrant	Tumor resection	Infiltrating Ductal Carcinoma	No	Not Available	Not Available	Negative	11	1	N2	T2	Stage IIIA	M0	NO	Not Available					Negative	Not Available	Positive	Not Available	Negative	Not Available	Not Available	Alive	TUMOR FREE	0	10	0	10
TCGA-AN-A0XT-01A-11R-A109-07	Tumor	Yes	No	FEMALE	WHITE	54	Post (prior bilateral ovariectomy OR >12 mo since LMP with no prior hysterectomy)	Left Upper Outer Quadrant	Tumor resection	Infiltrating Ductal Carcinoma	No	Not Available	Not Available	Negative	17	1	N2	T2	Stage IIIA	M0	NO	Not Available					Positive	Not Available	Negative	Not Available	Negative	Not Available	Not Available	Alive	TUMOR FREE	0	10	0	10
TCGA-AN-A0XU-01A-11R-A109-07	Tumor	Yes	No	FEMALE	WHITE	54	Post (prior bilateral ovariectomy OR >12 mo since LMP with no prior hysterectomy)	Left Upper Outer Quadrant	Tumor resection	Infiltrating Ductal Carcinoma	No	Not Available	Not Available	Negative	16	0	N0	T2	Stage IIA	M0	NO	Not Available				TNBC	Negative	Not Available	Negative	Not Available	Negative	Not Available	Not Available	Alive	TUMOR FREE	0	10	0	10
TCGA-AN-A0XV-01A-11R-A109-07	Tumor	Yes	No	FEMALE	WHITE	67	Post (prior bilateral ovariectomy OR >12 mo since LMP with no prior hysterectomy)	Right Upper Outer Quadrant	Tumor resection	Infiltrating Ductal Carcinoma	No	Not Available	Axillary lymph node dissection alone	Negative	16	7	N2	T2	Stage IIIA	M0	NO	Not Available				Her-2	Positive	90-99%	Positive	30-39%	Positive	2+	Not Available	Alive	TUMOR FREE	0	162	0	162
TCGA-AN-A0XW-01A-11R-A109-07	Tumor	Yes	No	FEMALE	WHITE	36	Pre (<6 months since LMP AND no prior bilateral ovariectomy AND not on estrogen replacement)	Left Upper Outer Quadrant	Tumor resection	Infiltrating Ductal Carcinoma	No	Not Available	Sentinel node biopsy alone	Negative	14	1	N2	T2	Stage IIIA	M0	NO	Not Available				Her-2	Positive	90-99%	Positive	90-99%	Positive	2+	Not Available	Alive	TUMOR FREE	0	170	0	170
TCGA-AO-A03L-01A-41R-A056-07	Tumor	Yes	No	FEMALE	ASIAN	34	Pre (<6 months since LMP AND no prior bilateral ovariectomy AND not on estrogen replacement)	Right Upper Inner Quadrant;Right Upper Outer Quadrant;Right Lower Inner Quadrant;Right Lower Outer Quadrant;Right	Core needle biopsy	Infiltrating Ductal Carcinoma	No	Modified Radical Mastectomy	Sentinel lymph node biopsy plus axillary dissection	Negative	17	4	N2	T3	Stage IIIA	M0	YES;YES	Not Available	Cyclophosphamide;Doxorubicin;Tamoxifen;Lupron;Paclitaxel	Not Available;Not Available;Not Available;Not Available;Not Available	ADJUVANT;ADJUVANT;ADJUVANT;ADJUVANT;ADJUVANT	Her-2	Positive	70-79%	Positive	10-19%	Positive	2+	1	Alive	TUMOR FREE	0	2442	0	2442
TCGA-AO-A03M-01B-11R-A10J-07	Tumor	Yes	No	FEMALE	WHITE	29	Pre (<6 months since LMP AND no prior bilateral ovariectomy AND not on estrogen replacement)	Left Upper Outer Quadrant;Left	Core needle biopsy	Infiltrating Ductal Carcinoma	No	Simple Mastectomy	Sentinel node biopsy alone	Negative	2	0	N0 (i-)	T1c	Stage I	M0	NO;NO	Not Available	Paclitaxel;Tamoxifen;Cyclophosphamide;Doxorubicin	Not Available;Not Available;Not Available;Not Available	ADJUVANT;ADJUVANT;ADJUVANT;ADJUVANT		Positive	70-79%	Positive	60-69%	Negative	2+	1.3	Alive	TUMOR FREE	0	1866	0	1866
TCGA-AO-A03N-01B-11R-A10J-07	Tumor	Yes	No	FEMALE	WHITE	59	Post (prior bilateral ovariectomy OR >12 mo since LMP with no prior hysterectomy)	Left Upper Inner Quadrant;Left Upper Outer Quadrant;Left	Core needle biopsy	Infiltrating Ductal Carcinoma	No	Modified Radical Mastectomy	Sentinel lymph node biopsy plus axillary dissection	Negative	19	2	N1a	T2	Stage IIB	M0	NO;NO	Not Available	Femara;Tamoxifen;Cyclophosphamide;Doxorubicin;Paclitaxel;Arimidex;Aromasin;Paclitaxel;Gemcitabine;Tesetaxel;Fulvestrant;Vinorelbine;Xgeva	Not Available;Not Available;Not Available;Not Available;Not Available;Not Available;Not Available;Not Available;Not Available;Not Available;Not Available;Not Available;Not Available	ADJUVANT;ADJUVANT;ADJUVANT;ADJUVANT;ADJUVANT;ADJUVANT;ADJUVANT;RECURRENCE;RECURRENCE;RECURRENCE;RECURRENCE;RECURRENCE;PROGRESSION		Positive	70-79%	Positive	<10%	Negative	0	Not Available	Alive	WITH TUMOR	0	2031	1	1645	1645	1	Locoregional Disease
TCGA-AO-A03O-01A-11R-A00Z-07	Tumor	Yes	No	FEMALE	BLACK OR AFRICAN AMERICAN	69	Post (prior bilateral ovariectomy OR >12 mo since LMP with no prior hysterectomy)	Right Upper Outer Quadrant;Right	Core needle biopsy	Infiltrating Ductal Carcinoma	No	Modified Radical Mastectomy	Sentinel lymph node biopsy plus axillary dissection	Negative	17	0	N0 (i-)	T2	Stage IIA	M0	NO	Not Available	ANASTROZOLE (ARIMIDEX);DOXORUBICIN;CYCLOPHOSPHAMIDE;PACLITAXEL	Not Available;Not Available;Not Available;Not Available	ADJUVANT;ADJUVANT;ADJUVANT;ADJUVANT		Positive	Not Available	Positive	Not Available	Negative	1+	1.1	Dead	TUMOR FREE	1	2483	0	2483
TCGA-AO-A03P-01A-11R-A00Z-07	Tumor	Yes	No	FEMALE	BLACK OR AFRICAN AMERICAN	54	Post (prior bilateral ovariectomy OR >12 mo since LMP with no prior hysterectomy)	Right Upper Outer Quadrant;Right	Core needle biopsy	Infiltrating Ductal Carcinoma	No	Lumpectomy	Sentinel lymph node biopsy plus axillary dissection	Close	26	2	N1	T2	Stage IIB	M0	YES;YES	Not Available	BEVACIZUMAB;CAPECITABINE;EXEMESTANE (AROMASIN);LETROZOLE (FEMARA);FULVESTRANT	Not Available;Not Available;Not Available;Not Available;Not Available	RECURRENCE;RECURRENCE;RECURRENCE;RECURRENCE;OTHER, SPECIFY IN NOTES		Positive	90-99%	Positive	40-49%	Negative	0	Not Available	Alive	WITH TUMOR	1	2911	1	1922	1922	1	Distant Metastasis	Liver
TCGA-AO-A03R-01A-21R-A034-07	Tumor	Yes	No	FEMALE	WHITE	57	Post (prior bilateral ovariectomy OR >12 mo since LMP with no prior hysterectomy)	Left Upper Inner Quadrant;Left Upper Outer Quadrant;Left	Core needle biopsy	Infiltrating Ductal Carcinoma	No	Modified Radical Mastectomy	Sentinel lymph node biopsy plus axillary dissection	Negative	26	3	N1a	T2	Stage IIB	M0	YES;YES	Not Available	DOXORUBICIN;LETROZOLE (FEMARA);PACLITAXEL;CYCLOPHOSPHAMIDE	Not Available;Not Available;Not Available;Not Available	ADJUVANT;ADJUVANT;ADJUVANT;ADJUVANT		Positive	90-99%	Positive	<10%	Negative	0	1.5	Alive	TUMOR FREE	0	2091	0	2091
TCGA-AO-A03T-01A-21R-A034-07	Tumor	Yes	No	FEMALE	WHITE	42	Pre (<6 months since LMP AND no prior bilateral ovariectomy AND not on estrogen replacement)	Left Upper Outer Quadrant;Left	Core needle biopsy	Infiltrating Ductal Carcinoma	No	Modified Radical Mastectomy	Sentinel lymph node biopsy plus axillary dissection	Negative	12	2	N1a	T2	Stage IIB	M0	NO;YES;NO	Not Available	CYCLOPHOSPHAMIDE;DOXORUBICIN;PACLITAXEL;TAMOXIFEN (NOVADEX);LUPRON;LETROZOLE (FEMARA)	Not Available;Not Available;Not Available;Not Available;Not Available;Not Available	ADJUVANT;ADJUVANT;ADJUVANT;ADJUVANT;ADJUVANT;ADJUVANT		Positive	90-99%	Positive	60-69%	Negative	0	Not Available	Alive	TUMOR FREE	0	2124	0	2124
TCGA-AO-A03U-01B-21R-A10J-07	Tumor	Yes	No	FEMALE	WHITE	31	Pre (<6 months since LMP AND no prior bilateral ovariectomy AND not on estrogen replacement)	Left Upper Inner Quadrant;Left Upper Outer Quadrant;Left Lower Inner Quadrant;Left Lower Outer Quadrant;Left	Core needle biopsy	Other, specify	No	Simple Mastectomy	Sentinel node biopsy alone	Negative	8	0	N0 (i-)	T1c	Stage I	M0	NO;NO	Not Available	Cyclophosphamide;Fluorouracil;Methotrexate	Not Available;Not Available;Not Available	ADJUVANT;ADJUVANT;ADJUVANT	TNBC	Negative	<10%	Negative	<10%	Negative	0	Not Available	Dead	TUMOR FREE	1	1793	1	1614	1614	1	New Primary Tumor	Lung
TCGA-AO-A03V-01A-11R-A115-07	Tumor	Yes	No	FEMALE	WHITE	41	Pre	Left Upper Inner Quadrant;Left	Core needle biopsy	Infiltrating Ductal Carcinoma	No	Simple Mastectomy	Sentinel node biopsy alone	Negative	2	0	N0 (i-)	T1c	Stage I	M0	NO;NO	Not Available	Fluorouracil;Cyclophosphamide;Tamoxifen;Arimidex;Methotrexate	Not Available;Not Available;Not Available;Not Available;Not Available	ADJUVANT;ADJUVANT;ADJUVANT;ADJUVANT;ADJUVANT		Positive	90-99%	Positive	80-89%	Negative	0	Not Available	Alive	TUMOR FREE	0	1351	0	1351
TCGA-AO-A0J2-01A-11R-A034-07	Tumor	Yes	No	FEMALE	WHITE	41	Pre (<6 months since LMP AND no prior bilateral ovariectomy AND not on estrogen replacement)	Left Lower Inner Quadrant;Left	Core needle biopsy	Infiltrating Ductal Carcinoma	No	Simple Mastectomy	Sentinel node biopsy alone	Negative	5	0	N0 (i-)	T1c	Stage IA	M0	NO;NO	Not Available	PACLITAXEL;CYCLOPHOSPHAMIDE;DOXORUBICIN	Not Available;Not Available;Not Available	ADJUVANT;ADJUVANT;ADJUVANT	TNBC	Negative	<10%	Negative	<10%	Negative	2+	1.5	Alive	TUMOR FREE	0	997	0	997
TCGA-AO-A0J3-01A-11R-A034-07	Tumor	Yes	No	FEMALE	WHITE	67	Post (prior bilateral ovariectomy OR >12 mo since LMP with no prior hysterectomy)	Right Upper Inner Quadrant;Right Upper Outer Quadrant;Right Lower Inner Quadrant;Right Lower Outer Quadrant;Right	Core needle biopsy	Other, specify	No	Modified Radical Mastectomy	Axillary lymph node dissection alone	Negative	36	1	N1b	T2	Stage IIB	M0	YES;YES	Not Available	METHOTREXATE;CYCLOPHOSPHAMIDE;FLOUROURACIL;DOXORUBICIN;CYCLOPHOSPHAMIDE;ANASTROZOLE (ARIMIDEX);PACLITAXEL	Not Available;Not Available;Not Available;Not Available;Not Available;Not Available;Not Available	ADJUVANT;ADJUVANT;ADJUVANT;ADJUVANT;ADJUVANT;ADJUVANT;ADJUVANT		Positive	<10%	Positive	<10%	Negative	2+	0.9	Alive	TUMOR FREE	0	651	0	651
TCGA-AO-A0J4-01A-11R-A034-07	Tumor	Yes	No	FEMALE	BLACK OR AFRICAN AMERICAN	41	Pre (<6 months since LMP AND no prior bilateral ovariectomy AND not on estrogen replacement)	Left Upper Outer Quadrant;Left	Core needle biopsy	Infiltrating Ductal Carcinoma	No	Lumpectomy	Sentinel node biopsy alone	Negative	4	0	N0 (i-)	T1c	Stage IA	M0	YES;YES	Not Available	Doxorubicin;Cyclophasphamide;Paclitaxel	Not Available;Not Available;Not Available	ADJUVANT;ADJUVANT;ADJUVANT	TNBC	Negative	<10%	Negative	<10%	Negative	Not Available	Not Available	Alive	TUMOR FREE	0	1587	0	1587
TCGA-AO-A0J5-01A-11R-A034-07	Tumor	No	No	FEMALE	WHITE	48	Pre (<6 months since LMP AND no prior bilateral ovariectomy AND not on estrogen replacement)	Right Upper Inner Quadrant;Right Upper Outer Quadrant;Right Lower Inner Quadrant;Right Lower Outer Quadrant;Right	Core needle biopsy	Other, specify	Yes	Modified Radical Mastectomy	Axillary lymph node dissection alone	Close	2	2	N1a	T4	Stage IV	M1	YES;YES	Not Available	Zoledronic Acid;Xeloda (Capecitabine);Femara (Letrozole);Fulvestrant (Faslodex)	Not Available;Not Available;Not Available;Not Available	OTHER, SPECIFY IN NOTES;PROGRESSION;OTHER, SPECIFY IN NOTES;PROGRESSION		Positive	90-99%	Negative	<10%	Negative	2+	1.1	Alive	WITH TUMOR	1	792	1	792
TCGA-AO-A0J6-01A-11R-A034-07	Tumor	Yes	No	FEMALE	WHITE	61	Post (prior bilateral ovariectomy OR >12 mo since LMP with no prior hysterectomy)	Left Upper Outer Quadrant;Left	Fine needle aspiration biopsy	Infiltrating Ductal Carcinoma	No	Lumpectomy	Sentinel node biopsy alone	Negative	4	0	N0 (i-)	T2	Stage IIA	M0	YES;YES	Not Available	PACLITAXEL;DOXORUBICIN;CYCLOPHOSPHAMIDE	Not Available;Not Available;Not Available	ADJUVANT;ADJUVANT;ADJUVANT	TNBC	Negative	<10%	Negative	<10%	Negative	0	Not Available	Alive	TUMOR FREE	0	1140	0	1140
TCGA-AO-A0J7-01A-11R-A034-07	Tumor	Yes	No	FEMALE	WHITE	71	Post (prior bilateral ovariectomy OR >12 mo since LMP with no prior hysterectomy)	Left Upper Inner Quadrant;Left Lower Inner Quadrant;Left	Core needle biopsy	Other, specify	No	Modified Radical Mastectomy	Sentinel lymph node biopsy plus axillary dissection	Negative	11	3	N1	T2	Stage IIB	M0	YES;YES	Not Available	DOXORUBICIN;ANASTROZOLE (ARIMIDEX);CYCLOPHOSPHAMIDE;PACLITAXEL	Not Available;Not Available;Not Available;Not Available	ADJUVANT;ADJUVANT;ADJUVANT;ADJUVANT		Positive	90-99%	Positive	<10%	Negative	1+	Not Available	Alive	TUMOR FREE	0	618	0	618
TCGA-AO-A0J8-01A-21R-A034-07	Tumor	Yes	No	FEMALE	WHITE	61	Post (prior bilateral ovariectomy OR >12 mo since LMP with no prior hysterectomy)	Right Upper Outer Quadrant;Right	Core needle biopsy	Infiltrating Lobular Carcinoma	No	Lumpectomy	Sentinel node biopsy alone	Negative	2	1	N0 (i+)	T2	Stage IIA	M0	YES;YES	Not Available	CYCLOPHOSPHAMIDE;ANASTROZOLE (ARIMIDEX);METHOTREXATE;Fluorouracil	Not Available;Not Available;Not Available;Not Available	ADJUVANT;ADJUVANT;ADJUVANT;ADJUVANT		Positive	90-99%	Positive	70-79%	Negative	1+	Not Available	Alive	TUMOR FREE	0	680	0	680
TCGA-AO-A0J9-01A-11R-A034-07	Tumor	Yes	No	FEMALE	WHITE	61	Post (prior bilateral ovariectomy OR >12 mo since LMP with no prior hysterectomy)	Right Upper Inner Quadrant;Right Upper Outer Quadrant;Right	Core needle biopsy	Infiltrating Lobular Carcinoma	No	Lumpectomy	Sentinel lymph node biopsy plus axillary dissection	Positive	32	15	N3	T2	Stage IIIC	M0	YES;YES	Not Available	PACLITAXEL;CYCLOPHOSPHAMIDE;DOCETAXEL;ARIMIDEX (ANASTROZOLE);DOXORUBICIN;ZOLEDRONIC ACID;AROMASIN (EXEMESTANE);TAMOXIFEN	Not Available;Not Available;Not Available;Not Available;Not Available;Not Available;Not Available;Not Available	ADJUVANT;ADJUVANT;ADJUVANT;ADJUVANT;ADJUVANT;RECURRENCE;RECURRENCE;PROGRESSION		Positive	90-99%	Positive	30-39%	Negative	Not Available	1.2	Alive	WITH TUMOR	0	1613	1	1066	1066	1	Distant Metastasis	Bone
TCGA-AO-A0JA-01A-11R-A056-07	Tumor	Yes	No	FEMALE	BLACK OR AFRICAN AMERICAN	36	Pre (<6 months since LMP AND no prior bilateral ovariectomy AND not on estrogen replacement)	Right Upper Inner Quadrant;Right Lower Inner Quadrant;Right	Core needle biopsy	Infiltrating Ductal Carcinoma	No	Modified Radical Mastectomy	Sentinel lymph node biopsy plus axillary dissection	Negative	11	11	N3	T2	Stage IIIC	M0	NO;NO	Not Available	PACLITAXEL;LEUPROLIDE ACETATE (LUPRON);ZOLEDRONIC ACID;TAMOXIFEN	Not Available;Not Available;Not Available;Not Available	PROGRESSION;RECURRENCE;RECURRENCE;RECURRENCE		Positive	90-99%	Positive	<10%	Negative	1+	Not Available	Alive	WITH TUMOR	0	655	1	143	143	1	Distant Metastasis	Bone
TCGA-AO-A0JB-01A-11R-A32Y-07	Tumor	Yes	No	FEMALE	WHITE	50	Pre (<6 months since LMP AND no prior bilateral ovariectomy AND not on estrogen replacement)	Left Upper Inner Quadrant;Left Upper Outer Quadrant;Left Lower Outer Quadrant;Left	Core needle biopsy	Infiltrating Ductal Carcinoma	No	Modified Radical Mastectomy	Axillary lymph node dissection alone	Negative	14	1	N1a	T3	Stage IIIA	M0	YES;YES	Not Available	CYCLOPHOSPHAMIDE;TAMOXIFEN;PACLITAXEL;DOXORUBICIN	Not Available;Not Available;Not Available;Not Available	ADJUVANT;ADJUVANT;ADJUVANT;ADJUVANT		Positive	90-99%	Positive	60-69%	Negative	0	Not Available	Alive	TUMOR FREE	0	1542	0	1542
TCGA-AO-A0JC-01A-11R-A056-07	Tumor	Yes	No	FEMALE	WHITE	64	Post (prior bilateral ovariectomy OR >12 mo since LMP with no prior hysterectomy)	Right Upper Outer Quadrant;Right Lower Outer Quadrant;Right	Core needle biopsy	Infiltrating Ductal Carcinoma	No	Modified Radical Mastectomy	Sentinel lymph node biopsy plus axillary dissection	Negative	12	0	N0 (i-)	T2	Stage IIA	M0	YES;YES	Not Available	LETROZOLE (FEMARA);FLUOROURACIL;CYCLOPHOSPHAMIDE;METHOTREXATE	Not Available;Not Available;Not Available;Not Available	ADJUVANT;ADJUVANT;ADJUVANT;ADJUVANT		Positive	90-99%	Positive	50-59%	Negative	0	Not Available	Alive	TUMOR FREE	0	1547	0	1547
TCGA-AO-A0JD-01A-11R-A056-07	Tumor	Yes	No	FEMALE	WHITE	59	Post (prior bilateral ovariectomy OR >12 mo since LMP with no prior hysterectomy)	Left Upper Outer Quadrant;Left	Core needle biopsy	Infiltrating Ductal Carcinoma	No	Modified Radical Mastectomy	Sentinel lymph node biopsy plus axillary dissection	Negative	27	3	N1a	T3	Stage IIIA	M0	YES;YES	Not Available	ANASTROZOLE (ARIMIDEX);CYCLOPHOSPHAMIDE;PACLITAXEL;DOXORUBICIN	Not Available;Not Available;Not Available;Not Available	ADJUVANT;ADJUVANT;ADJUVANT;ADJUVANT		Positive	90-99%	Positive	40-49%	Negative	1+	1.4	Alive	TUMOR FREE	0	2190	0	2190
TCGA-AO-A0JE-01A-11R-A056-07	Tumor	Yes	No	FEMALE	BLACK OR AFRICAN AMERICAN	53	Post (prior bilateral ovariectomy OR >12 mo since LMP with no prior hysterectomy)	Right Lower Outer Quadrant;Right	Core needle biopsy	Infiltrating Ductal Carcinoma	No	Lumpectomy	Sentinel lymph node biopsy plus axillary dissection	Positive	29	8	N2a	T2	Stage IIIA	M0	YES;YES	Not Available	PACLITAXEL;TRASTUZUMAB;DOXORUBICIN;CYCLOPHOSPHAMIDE	Not Available;Not Available;Not Available;Not Available	ADJUVANT;ADJUVANT;ADJUVANT;ADJUVANT	Her-2	Negative	<10%	Negative	<10%	Positive	3+	3.8	Alive	TUMOR FREE	0	2335	0	2335
TCGA-AO-A0JF-01A-11R-A056-07	Tumor	Yes	No	FEMALE	WHITE	68	Post (prior bilateral ovariectomy OR >12 mo since LMP with no prior hysterectomy)	Left Upper Outer Quadrant;Left	Core needle biopsy	Infiltrating Ductal Carcinoma	No	Lumpectomy	Sentinel lymph node biopsy plus axillary dissection	Negative	14	2	N1a	T1c	Stage IIA	M0	YES;YES;YES	Not Available	DOXORUBICIN;PACLITAXEL;ANASTROZOLE (ARIMIDEX);LETROZOLE (FEMARA);CYCLOPHOSPHAMIDE	Not Available;Not Available;Not Available;Not Available;Not Available	ADJUVANT;ADJUVANT;ADJUVANT;ADJUVANT;ADJUVANT		Positive	90-99%	Positive	70-79%	Negative	1+	Not Available	Alive	TUMOR FREE	0	1980	0	1980
TCGA-AO-A0JG-01A-31R-A084-07	Tumor	Yes	No	FEMALE	WHITE	49	Post (prior bilateral ovariectomy OR >12 mo since LMP with no prior hysterectomy)	Right Lower Outer Quadrant;Right	Core needle biopsy	Other, specify	No	Modified Radical Mastectomy	Axillary lymph node dissection alone	Close	19	4	N2a	T2	Stage IIIA	M0	YES;YES	Not Available	PACLITAXEL;DOXORUBICIN;ARIMIDEX;CYCLOPHOSPHAMIDE	Not Available;Not Available;Not Available;Not Available	ADJUVANT;ADJUVANT;ADJUVANT;ADJUVANT		Positive	90-99%	Positive	10-19%	Negative	1+	Not Available	Alive	TUMOR FREE	0	798	0	798
TCGA-AO-A0JI-01A-21R-A056-07	Tumor	Yes	No	FEMALE	WHITE	56	Post (prior bilateral ovariectomy OR >12 mo since LMP with no prior hysterectomy)	Left Upper Outer Quadrant;Left	Core needle biopsy	Infiltrating Ductal Carcinoma	No	Modified Radical Mastectomy	Sentinel lymph node biopsy plus axillary dissection	Negative	10	1	N1	T1c	Stage IIA	M0	NO;NO	Not Available	Cyclophosphamide;Arimidex (Anastrozole);Doxorubicin;Paclitaxel	Not Available;Not Available;Not Available;Not Available	ADJUVANT;ADJUVANT;ADJUVANT;ADJUVANT		Positive	90-99%	Negative	<10%	Negative	1+	Not Available	Alive	TUMOR FREE	0	1528	0	1528
TCGA-AO-A0JJ-01A-11R-A056-07	Tumor	Yes	No	FEMALE	WHITE	54	Post (prior bilateral ovariectomy OR >12 mo since LMP with no prior hysterectomy)	Left Upper Outer Quadrant;Left	Core needle biopsy	Infiltrating Lobular Carcinoma	No	Modified Radical Mastectomy	Sentinel lymph node biopsy plus axillary dissection	Negative	44	2	N1a	T2	Stage IIB	M0	YES;YES	Not Available	Abraxane;Cyclophospamide;Letrozole (Femara);Doxorubicin;Paclitaxel	Not Available;Not Available;Not Available;Not Available;Not Available	ADJUVANT;ADJUVANT;ADJUVANT;ADJUVANT;ADJUVANT		Positive	90-99%	Positive	70-79%	Negative	0	Not Available	Alive	TUMOR FREE	0	1887	0	1887
TCGA-AO-A0JL-01A-11R-A056-07	Tumor	Yes	No	FEMALE	WHITE	59	Post (prior bilateral ovariectomy OR >12 mo since LMP with no prior hysterectomy)	Left Upper Outer Quadrant;Left Lower Outer Quadrant;Left	Core needle biopsy	Infiltrating Ductal Carcinoma	No	Modified Radical Mastectomy	Axillary lymph node dissection alone	Negative	26	7	N2a	T2	Stage IIIA	M0	YES;YES	Not Available	DOXORUBICIN;TRASTUZUMAB;CYCLOPHOSPHAMIDE;PACLITAXEL	Not Available;Not Available;Not Available;Not Available	ADJUVANT;ADJUVANT;ADJUVANT;ADJUVANT	TNBC	Negative	<10%	Negative	<10%	Negative	1+	2.6	Alive	TUMOR FREE	0	1683	0	1683
TCGA-AO-A0JM-01A-21R-A056-07	Tumor	Yes	No	FEMALE	Not Available	40	Pre (<6 months since LMP AND no prior bilateral ovariectomy AND not on estrogen replacement)	Right Lower Inner Quadrant;Right Lower Outer Quadrant;Right	Core needle biopsy	Infiltrating Ductal Carcinoma	No	Modified Radical Mastectomy	Sentinel lymph node biopsy plus axillary dissection	Negative	23	2	N1	T2	Stage IIB	M0	YES;YES	Not Available	TAMOXIFEN;TRASTUZUMAB;DOXORUBICIN;PACLITAXEL;CYCLOPHOSPHAMIDE	Not Available;Not Available;Not Available;Not Available;Not Available	ADJUVANT;ADJUVANT;ADJUVANT;ADJUVANT;ADJUVANT	Her-2	Positive	90-99%	Positive	<10%	Positive	3+	5	Alive	TUMOR FREE	0	2184	0	2184
TCGA-AO-A124-01A-11R-A10J-07	Tumor	Yes	No	FEMALE	WHITE	38	Pre (<6 months since LMP AND no prior bilateral ovariectomy AND not on estrogen replacement)	Left	Core needle biopsy	Other, specify	No	Modified Radical Mastectomy	Sentinel lymph node biopsy plus axillary dissection	Negative	18	0	N0 (i-)	T2	Stage IIA	M0	NO;NO	Not Available	Doxorubicin;Paclitaxel;Cyclophosphamide	Not Available;Not Available;Not Available	ADJUVANT;ADJUVANT;ADJUVANT	TNBC	Negative	<10%	Negative	<10%	Negative	0	Not Available	Alive	TUMOR FREE	0	3506	0	3506
TCGA-AO-A125-01A-11R-A10J-07	Tumor	Yes	No	FEMALE	BLACK OR AFRICAN AMERICAN	72	Post (prior bilateral ovariectomy OR >12 mo since LMP with no prior hysterectomy)	Left Upper Inner Quadrant;Left Upper Outer Quadrant;Left	Core needle biopsy	Other, specify	No	Simple Mastectomy	Sentinel node biopsy alone	Negative	5	0	N0 (i-)	T2	Stage IIA	M0	NO;NO	Not Available	Aromasin (Exemestane);Tamoxifen	Not Available;Not Available	ADJUVANT;ADJUVANT		Positive	50-59%	Positive	90-99%	Negative	0	1	Alive	TUMOR FREE	0	3456	0	3456
TCGA-AO-A126-01A-11R-A10J-07	Tumor	Yes	No	FEMALE	ASIAN	39	Pre (<6 months since LMP AND no prior bilateral ovariectomy AND not on estrogen replacement)	Right Upper Inner Quadrant;Right	Core needle biopsy	Infiltrating Ductal Carcinoma	No	Simple Mastectomy	Sentinel node biopsy alone	Negative	5	0	N0 (i-)	T2	Stage IIA	M0	YES;YES	Not Available	Methotrexate;Cyclophosphamide;Fluorouracil;Tamoxifen;Zoladex	Not Available;Not Available;Not Available;Not Available;Not Available	ADJUVANT;ADJUVANT;ADJUVANT;RECURRENCE;RECURRENCE		Positive	10-19%	Positive	10-19%	Negative	1+	1.1	Alive	TUMOR FREE	0	3307	1	267	267	1	Locoregional Disease
TCGA-AO-A128-01A-11R-A10J-07	Tumor	Yes	No	FEMALE	WHITE	61	Post (prior bilateral ovariectomy OR >12 mo since LMP with no prior hysterectomy)	Right Lower Outer Quadrant;Right	Fine needle aspiration biopsy	Infiltrating Ductal Carcinoma	No	Lumpectomy	Sentinel node biopsy alone	Negative	15	0	N0 (i-)	T2	Stage IIA	M0	YES;YES	Not Available	Doxorubicin;Paclitaxel;Cyclophosphamide	Not Available;Not Available;Not Available	ADJUVANT;ADJUVANT;ADJUVANT	TNBC	Negative	<10%	Negative	<10%	Negative	0	1	Alive	TUMOR FREE	0	3248	0	3248
TCGA-AO-A129-01A-21R-A10J-07	Tumor	Yes	No	FEMALE	WHITE	29	Pre (<6 months since LMP AND no prior bilateral ovariectomy AND not on estrogen replacement)	Left Lower Outer Quadrant;Left	Core needle biopsy	Infiltrating Ductal Carcinoma	No	Modified Radical Mastectomy	Axillary lymph node dissection alone	Negative	21	2	N1a	T2	Stage IIB	M0	YES;YES	Not Available	Paclitaxel;Cyclophosphamide;Doxorubicin	Not Available;Not Available;Not Available	ADJUVANT;ADJUVANT;ADJUVANT	TNBC	Negative	<10%	Negative	<10%	Negative	0	1	Alive	TUMOR FREE	0	3286	0	3286
TCGA-AO-A12A-01A-21R-A115-07	Tumor	Yes	No	FEMALE	WHITE	47	Pre (<6 months since LMP AND no prior bilateral ovariectomy AND not on estrogen replacement)	Right Upper Outer Quadrant;Right	Core needle biopsy	Infiltrating Ductal Carcinoma	No	Modified Radical Mastectomy	Sentinel lymph node biopsy plus axillary dissection	Close	27	1	N0 (i+)	T2	Stage IIA	M0	NO;NO	Not Available	Tamoxifen;Cyclophosphamide;Aromasin;Doxorubicin;Paclitaxel	Not Available;Not Available;Not Available;Not Available;Not Available	ADJUVANT;ADJUVANT;ADJUVANT;ADJUVANT;ADJUVANT		Positive	90-99%	Positive	90-99%	Negative	1+	1	Alive	TUMOR FREE	0	3112	0	3112
TCGA-AO-A12B-01A-11R-A10J-07	Tumor	Yes	No	FEMALE	WHITE	63	Post (prior bilateral ovariectomy OR >12 mo since LMP with no prior hysterectomy)	Right Upper Inner Quadrant;Right Lower Inner Quadrant;Right	Core needle biopsy	Infiltrating Ductal Carcinoma	No	Simple Mastectomy	Sentinel node biopsy alone	Negative	2	0	N0 (i-)	T2	Stage IIA	M0	NO;NO;NO	Not Available	Methotrexate;Cyclophosphamide;Arimidex;Fluorouracil	Not Available;Not Available;Not Available;Not Available	ADJUVANT;ADJUVANT;ADJUVANT;ADJUVANT		Positive	90-99%	Positive	90-99%	Negative	0	Not Available	Alive	TUMOR FREE	0	2989	0	2989
TCGA-AO-A12C-01A-11R-A10J-07	Tumor	Yes	No	FEMALE	WHITE	42	Pre (<6 months since LMP AND no prior bilateral ovariectomy AND not on estrogen replacement)	Left Upper Outer Quadrant;Left	Core needle biopsy	Infiltrating Ductal Carcinoma	No	Lumpectomy	Sentinel lymph node biopsy plus axillary dissection	Positive	31	2	N1a	T2	Stage IIB	M0	YES;YES	Not Available	Doxorubicin;Paclitaxel;Tamoxifen;Trastuzumab;Cyclophosphamide	Not Available;Not Available;Not Available;Not Available;Not Available	ADJUVANT;ADJUVANT;ADJUVANT;ADJUVANT;ADJUVANT	Her-2	Positive	90-99%	Positive	40-49%	Positive	3+	1.6	Alive	TUMOR FREE	0	2372	0	2372
TCGA-AO-A12D-01A-11R-A115-07	Tumor	Yes	No	FEMALE	WHITE	43	Pre (<6 months since LMP AND no prior bilateral ovariectomy AND not on estrogen replacement)	Left Upper Outer Quadrant;Left	Core needle biopsy	Infiltrating Ductal Carcinoma	No	Modified Radical Mastectomy	Sentinel lymph node biopsy plus axillary dissection	Negative	16	1	N1a	T1c	Stage IIA	M0	YES;YES;YES	Not Available	Trastuzumab;Albumin-Bound Paclitaxel;Cyclophosphamide;Doxorubicin	Not Available;Not Available;Not Available;Not Available	ADJUVANT;ADJUVANT;ADJUVANT;ADJUVANT	Her-2	Negative	<10%	Negative	<10%	Positive	3+	6.7	Alive	TUMOR FREE	0	2515	0	2515
TCGA-AO-A12E-01A-11R-A10J-07	Tumor	Yes	No	FEMALE	WHITE	51	Pre (<6 months since LMP AND no prior bilateral ovariectomy AND not on estrogen replacement)	Right Lower Inner Quadrant;Right Lower Outer Quadrant;Right	Core needle biopsy	Infiltrating Lobular Carcinoma	No	Modified Radical Mastectomy	Axillary lymph node dissection alone	Negative	13	1	N0 (i+)	T3	Stage IIB	M0	YES;YES	Not Available	Doxorubicin;Paclitaxel;Cyclophosphamide;Tamoxifen	Not Available;Not Available;Not Available;Not Available	ADJUVANT;ADJUVANT;ADJUVANT;ADJUVANT		Positive	80-89%	Positive	40-49%	Negative	0	Not Available	Alive	TUMOR FREE	0	2142	0	2142
TCGA-AO-A12F-01A-11R-A115-07	Tumor	Yes	No	FEMALE	WHITE	36	Pre (<6 months since LMP AND no prior bilateral ovariectomy AND not on estrogen replacement)	Right Upper Outer Quadrant;Right	Core needle biopsy	Infiltrating Ductal Carcinoma	No	Simple Mastectomy	Sentinel node biopsy alone	Negative	17	0	N0 (i-)	T2	Stage IIA	M0	YES;YES	Not Available	Paclitaxel;Cyclophosphamide;Doxorubicin	Not Available;Not Available;Not Available	ADJUVANT;ADJUVANT;ADJUVANT	TNBC	Negative	<10%	Negative	<10%	Negative	1+	Not Available	Alive	TUMOR FREE	0	1842	0	1842
TCGA-AO-A12G-01A-11R-A10J-07	Tumor	Yes	No	FEMALE	WHITE	75	Post (prior bilateral ovariectomy OR >12 mo since LMP with no prior hysterectomy)	Right Upper Outer Quadrant;Right	Core needle biopsy	Other, specify	No	Simple Mastectomy	Sentinel node biopsy alone	Negative	4	1	N0 (i+)	T2	Stage IIA	M0	NO;NO	Not Available	Arimidex (Anastrozole)	Not Available	ADJUVANT	Her-2	Positive	90-99%	Positive	30-39%	Positive	2+	1	Alive	TUMOR FREE	0	1639	0	1639
TCGA-AO-A12H-01A-11R-A115-07	Tumor	Yes	No	FEMALE	BLACK OR AFRICAN AMERICAN	69	Pre (<6 months since LMP AND no prior bilateral ovariectomy AND not on estrogen replacement)	Right Upper Outer Quadrant;Right	Core needle biopsy	Other, specify	No	Simple Mastectomy	Sentinel node biopsy alone	Negative	10	0	N0 (i-)	T2	Stage IIA	M0	NO;NO	Not Available	Arimidex (Anastrozole)	Not Available	ADJUVANT		Positive	90-99%	Positive	<10%	Negative	0	Not Available	Alive	TUMOR FREE	0	1234	0	1234
TCGA-AO-A1KO-01A-31R-A13Q-07	Tumor	Yes	No	FEMALE	WHITE	46	Pre (<6 months since LMP AND no prior bilateral ovariectomy AND not on estrogen replacement)	Left Upper Outer Quadrant;Left Lower Outer Quadrant;Left	Excisional Biopsy	Infiltrating Lobular Carcinoma	No	Simple Mastectomy	Sentinel lymph node biopsy plus axillary dissection	Negative	19	1	N0 (i+)	T3	Stage IIB	M0	NO;NO	Not Available	Paclitaxel;Cyclophosphamide;Tamoxifen;Doxorubicin	Not Available;Not Available;Not Available;Not Available	ADJUVANT;ADJUVANT;ADJUVANT;ADJUVANT		Positive	90-99%	Positive	90-99%	Negative	1+	Not Available	Alive	TUMOR FREE	0	622	0	622
TCGA-AO-A1KP-01A-11R-A13Q-07	Tumor	Yes	No	FEMALE	WHITE	77	Post (prior bilateral ovariectomy OR >12 mo since LMP with no prior hysterectomy)	Left Lower Inner Quadrant;Left Lower Outer Quadrant;Left	Core needle biopsy	Infiltrating Ductal Carcinoma	No	Simple Mastectomy	Sentinel lymph node biopsy plus axillary dissection	Negative	9	1	N1	T1	Stage IIA	M0	NO;NO	Not Available	Fluorouracil;Cyclophosphamide;Methotrexate;Arimidex	Not Available;Not Available;Not Available;Not Available	ADJUVANT;ADJUVANT;ADJUVANT;ADJUVANT		Positive	80-89%	Positive	40-49%	Negative	1+	1.3	Alive	TUMOR FREE	0	2953	0	2953
TCGA-AO-A1KQ-01A-11R-A13Q-07	Tumor	No	No	MALE	WHITE	84	Post	Left Upper Inner Quadrant;Left Upper Outer Quadrant;Left Lower Inner Quadrant;Left	Core needle biopsy	Infiltrating Ductal Carcinoma	No	Modified Radical Mastectomy	Sentinel lymph node biopsy plus axillary dissection	Negative	9	2	N1	T4	Stage IIIB	M0	NO;NO	Not Available	Tamoxifen	Not Available	ADJUVANT		Positive	90-99%	Positive	80-89%	Negative	1+	Not Available	Alive	TUMOR FREE	0	1882	0	1882
TCGA-AO-A1KR-01A-12R-A144-07	Tumor	Yes	No	FEMALE	WHITE	51	Pre (<6 months since LMP AND no prior bilateral ovariectomy AND not on estrogen replacement)	Right Upper Inner Quadrant	Core needle biopsy	Infiltrating Ductal Carcinoma	No	Simple Mastectomy	Sentinel node biopsy alone	Negative	4	0	N0	T2	Stage IIA	M0	NO	Not Available	paclitaxel;cyclophosphamide;doxorubicin	Not Available;Not Available;Not Available	ADJUVANT;ADJUVANT;ADJUVANT	TNBC	Negative	Not Available	Negative	Not Available	Negative	1+	Not Available	Alive	TUMOR FREE	0	2513	0	2513
TCGA-AO-A1KS-01A-11R-A13Q-07	Tumor	Yes	No	FEMALE	WHITE	69	Post (prior bilateral ovariectomy OR >12 mo since LMP with no prior hysterectomy)	Left Lower Inner Quadrant;Left Lower Outer Quadrant;Left	Core needle biopsy	Infiltrating Lobular Carcinoma	No	Lumpectomy	Sentinel node biopsy alone	Negative	5	0	N0 (i-)	T2	Stage IIA	M0	YES;YES	Not Available	Arimidex	Not Available	ADJUVANT		Positive	90-99%	Positive	90-99%	Negative	2+	1	Alive	TUMOR FREE	0	350	0	350
TCGA-AO-A1KT-01A-11R-A13Q-07	Tumor	Yes	No	FEMALE	WHITE	78	Post (prior bilateral ovariectomy OR >12 mo since LMP with no prior hysterectomy)	Left Upper Outer Quadrant;Left	Core needle biopsy	Infiltrating Ductal Carcinoma	No	Lumpectomy	Sentinel node biopsy alone	Negative	5	1	N1	T1	Stage IIA	M0	YES	Not Available	Arimidex;Fluorouracil;Methotrexate;Cyclophosphamide	Not Available;Not Available;Not Available;Not Available	ADJUVANT;ADJUVANT;ADJUVANT;ADJUVANT		Positive	90-99%	Positive	40-49%	Negative	2+	1.4	Alive	TUMOR FREE	0	541	0	541
TCGA-AQ-A04H-01B-11R-A10J-07	Tumor	Yes	No	FEMALE	WHITE	61	Post (prior bilateral ovariectomy OR >12 mo since LMP with no prior hysterectomy)	Left Lower Inner Quadrant	Core needle biopsy	Infiltrating Ductal Carcinoma	No	Modified Radical Mastectomy	Axillary lymph node dissection alone	Negative	15	4	N2a	T2	Stage IIIA	MX	YES;YES	Not Available	Femara;Taxotere;Carboplatin;Herceptin	Not Available;Not Available;Complete Response;Complete Response	ADJUVANT;ADJUVANT;Not Available;Not Available	Her-2	Positive	90-99%	Positive	20-29%	Positive	2+	3.2	Alive	TUMOR FREE	0	754	0	754
TCGA-AQ-A04J-01A-02R-A034-07	Tumor	Yes	No	FEMALE	WHITE	45	Pre (<6 months since LMP AND no prior bilateral ovariectomy AND not on estrogen replacement)	Right Upper Outer Quadrant	Core needle biopsy	Infiltrating Ductal Carcinoma	No	Simple Mastectomy	Axillary lymph node dissection alone	Negative	20	0	N0 (i+)	T2	Stage IIA	M0	NO;NO	Not Available	Cytoxan;Adriamycin;Taxol	Not Available;Not Available;Not Available	ADJUVANT;ADJUVANT;ADJUVANT	TNBC	Negative	<10%	Negative	<10%	Negative	0	Not Available	Alive	TUMOR FREE	0	819	0	819
TCGA-AQ-A04L-01B-21R-A10J-07	Tumor	Yes	No	FEMALE	WHITE	48	Pre	Right	Fine needle aspiration biopsy	Infiltrating Ductal Carcinoma	No	Modified Radical Mastectomy	Sentinel node biopsy alone	Negative	2	0	N0 (i-)	T2	Stage IIA	MX	NO;NO	Not Available	Adriamycin;Tamoxifen;Cytoxan	Not Available;Not Available;Not Available	ADJUVANT;ADJUVANT;ADJUVANT	Her-2	Positive	60-69%	Negative	Not Available	Positive	3+	Not Available	Alive	TUMOR FREE	0	3957	0	3957
TCGA-AQ-A0Y5-01A-11R-A14M-07	Tumor	No	No	FEMALE	WHITE	70	Post (prior bilateral ovariectomy OR >12 mo since LMP with no prior hysterectomy)	Right	Core needle biopsy	Infiltrating Ductal Carcinoma	Yes	Modified Radical Mastectomy	Sentinel lymph node biopsy plus axillary dissection	Negative	17	5	N2a	T2	Stage IIIA	MX	NO	Not Available	Cytoxan;Herceptin;Taxotere	Not Available;Not Available;Not Available	ADJUVANT;ADJUVANT;ADJUVANT	Her-2	Positive	70-79%	Positive	40-49%	Positive	2+	3.8	Dead	TUMOR FREE	1	172	0	172
TCGA-AQ-A1H2-01A-11R-A13Q-07	Tumor	Yes	No	FEMALE	WHITE	84	Post (prior bilateral ovariectomy OR >12 mo since LMP with no prior hysterectomy)	Right Upper Outer Quadrant	Core needle biopsy	Infiltrating Ductal Carcinoma	No	Modified Radical Mastectomy	Axillary lymph node dissection alone	Negative	19	13	N2a	T2	Stage IIIA	MX	YES	Not Available	Herceptin;Arimidex;Taxol	Not Available;Not Available;Not Available	ADJUVANT;ADJUVANT;ADJUVANT	Her-2	Positive	90-99%	Positive	10-19%	Positive	2+	2.7	Alive	TUMOR FREE	0	475	0	475
TCGA-AQ-A1H3-01A-31R-A13Q-07	Tumor	Yes	No	FEMALE	WHITE	49	Pre (<6 months since LMP AND no prior bilateral ovariectomy AND not on estrogen replacement)	Right Upper Outer Quadrant	Core needle biopsy	Infiltrating Ductal Carcinoma	No	Modified Radical Mastectomy	Sentinel lymph node biopsy plus axillary dissection	Negative	23	14	N3a	T2	Stage IIIC	MX	YES;YES	Not Available	Taxol;Adriamycin;Tamoxifen;Cytoxan	Not Available;Not Available;Not Available;Not Available	ADJUVANT;ADJUVANT;ADJUVANT;ADJUVANT		Positive	90-99%	Positive	80-89%	Negative	1+	Not Available	Alive	TUMOR FREE	0	989	0	989
TCGA-AQ-A54N-01A-11R-A266-07	Tumor	Yes	No	FEMALE	BLACK OR AFRICAN AMERICAN	51	Post (prior bilateral ovariectomy OR >12 mo since LMP with no prior hysterectomy)	Left Lower Inner Quadrant	Core needle biopsy	Infiltrating Ductal Carcinoma	No	Lumpectomy	Sentinel node biopsy alone	Negative	1	0	N0	T2	Stage IIA	M0	NO	NO				TNBC	Negative	Not Available	Negative	Not Available	Negative	2+	1.1	Alive	TUMOR FREE	0	78	0	78
TCGA-AQ-A54O-01A-11R-A266-07	Tumor	No	No	MALE	BLACK OR AFRICAN AMERICAN	51	Not Available	Right Upper Outer Quadrant	Fine needle aspiration biopsy	Infiltrating Ductal Carcinoma	No	Simple Mastectomy	Sentinel lymph node biopsy plus axillary dissection	Negative	14	0	N0	T2	Stage IIA	M0	NO	NO	Adriamycin;Cytoxan;Taxol;Tamoxifen	Complete Response;Complete Response;Complete Response;Not Applicable	Not Available;Not Available;Not Available;Not Available		Positive	90-99%	Positive	70-79%	Negative	1+	Not Available	Alive	TUMOR FREE	0	1001	0	1001
TCGA-AQ-A7U7-01A-22R-A352-07	Tumor	Yes	No	FEMALE	WHITE	55	Post (prior bilateral ovariectomy OR >12 mo since LMP with no prior hysterectomy)	Left	Core needle biopsy	Infiltrating Lobular Carcinoma	No	Other	Sentinel lymph node biopsy plus axillary dissection	Negative	14	4	N2a	T2	Stage IIIA	M0	YES	YES	Rituximab;Cyclophosphamide;Doxorubicin;Vincristine;Prednisone;Letrozole	Complete Response;Complete Response;Complete Response;Complete Response;Complete Response;Not Applicable	Not Available;Not Available;Not Available;Not Available;Not Available;Not Available		Positive	80-89%	Positive	80-89%	Negative	Not Available	Not Available	Alive	TUMOR FREE	1	584	0	584
TCGA-AR-A0TP-01A-11R-A084-07	Tumor	Yes	No	FEMALE	WHITE	43	Pre (<6 months since LMP AND no prior bilateral ovariectomy AND not on estrogen replacement)	Left Upper Inner Quadrant	Core needle biopsy	Infiltrating Ductal Carcinoma	No	Other	Sentinel lymph node biopsy plus axillary dissection	Negative	5	0	N0	T2	Stage IIA	M0	YES;YES;YES	Not Available	Doxorubicin;Cytoxan	Not Available;Not Available	ADJUVANT;ADJUVANT		Positive	<10%	Negative	Not Available	Negative	Not Available	Not Available	Alive	TUMOR FREE	0	4275	0	4275
TCGA-AR-A0TQ-01A-11R-A084-07	Tumor	Yes	No	FEMALE	WHITE	27	Pre (<6 months since LMP AND no prior bilateral ovariectomy AND not on estrogen replacement)	Right Upper Outer Quadrant	Core needle biopsy	Infiltrating Ductal Carcinoma	No	Simple Mastectomy	Axillary lymph node dissection alone	Negative	15	2	N1	T3	Stage IIIA	M0	YES;YES;YES	Not Available	Doxorubicin;Trastuzumab;Paclitaxel;Trastuzumab;Paclitaxel;Trastuzumab;Cytoxan;Exemestane;Triptorelin	Not Available;Not Available;Not Available;Not Available;Not Available;Not Available;Not Available;Not Available;Not Available	ADJUVANT;ADJUVANT;ADJUVANT;ADJUVANT;ADJUVANT;ADJUVANT;ADJUVANT;ADJUVANT;ADJUVANT		Positive	10-19%	Negative	Not Available	Negative	2+	Not Available	Alive	TUMOR FREE	0	2991	0	2991
TCGA-AR-A0TR-01A-11R-A084-07	Tumor	Yes	No	FEMALE	WHITE	68	Post (prior bilateral ovariectomy OR >12 mo since LMP with no prior hysterectomy)	Left	Other method, specify:	Infiltrating Ductal Carcinoma	No	Modified Radical Mastectomy	Sentinel lymph node biopsy plus axillary dissection	Negative	27	1	N1	T2	Stage IIB	M0	NO	Not Available	Tamoxifen	Not Available	ADJUVANT		Positive	Not Available	Positive	Not Available	Negative	2+	Not Available	Dead		1	160	0	160
TCGA-AR-A0TS-01A-11R-A115-07	Tumor	Yes	No	FEMALE	WHITE	46	Pre (<6 months since LMP AND no prior bilateral ovariectomy AND not on estrogen replacement)	Right	Core needle biopsy	Infiltrating Ductal Carcinoma	No	Lumpectomy	Sentinel lymph node biopsy plus axillary dissection	Negative	16	2	N1	T2	Stage IIB	M0	YES;YES;YES	Not Available	Doxorubicin;Paclitaxel;Cytoxan	Not Available;Not Available;Not Available	ADJUVANT;ADJUVANT;ADJUVANT	TNBC	Negative	Not Available	Negative	Not Available	Negative	1+	Not Available	Alive	TUMOR FREE	0	2558	0	2558
TCGA-AR-A0TT-01A-31R-A084-07	Tumor	Yes	No	FEMALE	BLACK OR AFRICAN AMERICAN	53	Pre (<6 months since LMP AND no prior bilateral ovariectomy AND not on estrogen replacement)	Right Upper Outer Quadrant	Core needle biopsy	Infiltrating Ductal Carcinoma	No	Other	Sentinel lymph node biopsy plus axillary dissection	Negative	19	5	N2	T2	Stage IIIA	M0	YES;YES;YES	Not Available	Paclitaxel;Tamoxifen;Anastrozole;Doxorubicin;Cytoxan	Not Available;Not Available;Not Available;Not Available;Not Available	ADJUVANT;ADJUVANT;ADJUVANT;ADJUVANT;ADJUVANT		Positive	10-19%	Negative	Not Available	Negative	1+	Not Available	Alive	TUMOR FREE	0	3316	0	3316
TCGA-AR-A0TU-01A-31R-A109-07	Tumor	Yes	No	FEMALE	Not Available	35	Pre (<6 months since LMP AND no prior bilateral ovariectomy AND not on estrogen replacement)	Right Lower Outer Quadrant	Core needle biopsy	Infiltrating Ductal Carcinoma	No	Simple Mastectomy	Sentinel lymph node biopsy plus axillary dissection	Negative	4	0	N0	T2	Stage IIA	M0	NO;NO	Not Available	Doxorubicin;Docetaxel;Cytoxan	Not Available;Not Available;Not Available	ADJUVANT;ADJUVANT;ADJUVANT	TNBC	Negative	Not Available	Negative	Not Available	Negative	1+	Not Available	Alive	TUMOR FREE	0	709	0	709
TCGA-AR-A0TV-01A-21R-A084-07	Tumor	Yes	No	FEMALE	Not Available	66	Post (prior bilateral ovariectomy OR >12 mo since LMP with no prior hysterectomy)	Left Upper Outer Quadrant	Core needle biopsy	Infiltrating Ductal Carcinoma	No	Simple Mastectomy	Sentinel lymph node biopsy plus axillary dissection	Negative	3	0	N0	T2	Stage IIA	M0	NO;NO	Not Available					Positive	90-99%	Positive	Not Available	Negative	2+	Not Available	Alive	TUMOR FREE	0	2288	0	2288
TCGA-AR-A0TW-01A-11R-A084-07	Tumor	Yes	No	FEMALE	WHITE	50	Pre (<6 months since LMP AND no prior bilateral ovariectomy AND not on estrogen replacement)	Right Upper Outer Quadrant;Right Lower Outer Quadrant	Core needle biopsy	Infiltrating Ductal Carcinoma	No	Modified Radical Mastectomy	Not Available	Negative	27	3	N1	T3	Stage IIIA	M0	NO;NO	Not Available	Doxorubicin;Cytoxan;Paclitaxel	Not Available;Not Available;Not Available	ADJUVANT;ADJUVANT;ADJUVANT		Positive	Not Available	Positive	Not Available	Negative	2+	Not Available	Alive	TUMOR FREE	0	3009	1	739	739	1
TCGA-AR-A0TX-01A-11R-A084-07	Tumor	Yes	No	FEMALE	Not Available	64	Post (prior bilateral ovariectomy OR >12 mo since LMP with no prior hysterectomy)	Left Upper Outer Quadrant	Core needle biopsy	Infiltrating Ductal Carcinoma	No	Other	Axillary lymph node dissection alone	Negative	25	3	N1	T1	Stage IIA	M0	YES;YES;YES	Not Available				Her-2	Positive	<10%	Positive	Not Available	Positive	3+	Not Available	Alive	TUMOR FREE	0	1972	0	1972
TCGA-AR-A0TY-01A-12R-A115-07	Tumor	Yes	No	FEMALE	WHITE	54	Post (prior bilateral ovariectomy OR >12 mo since LMP with no prior hysterectomy)	Right Upper Outer Quadrant	Core needle biopsy	Infiltrating Ductal Carcinoma	No	Simple Mastectomy	Sentinel lymph node biopsy plus axillary dissection	Negative	15	0	N0	T2	Stage IIA	M0	NO	Not Available	Paclitaxel;Anastrozole;Doxorubicin;Cytoxan	Not Available;Not Available;Not Available;Not Available	ADJUVANT;ADJUVANT;ADJUVANT;ADJUVANT		Positive	10-19%	Negative	Not Available	Negative	Not Available	Not Available	Dead	WITH TUMOR	1	1699	1	544	544	1	Distant Metastasis	Bone
TCGA-AR-A0TZ-01A-12R-A084-07	Tumor	Yes	No	FEMALE	WHITE	43	Pre (<6 months since LMP AND no prior bilateral ovariectomy AND not on estrogen replacement)	Left Upper Outer Quadrant	Core needle biopsy	Infiltrating Ductal Carcinoma	No	Modified Radical Mastectomy	Not Available	Negative	30	6	N2	T2	Discrepancy	M1	YES;YES	Not Available	Doxorubicin;Tamoxifen;Paclitaxel;Not Available;Cytoxan	Not Available;Not Available;Not Available;Not Available;Not Available	ADJUVANT;ADJUVANT;ADJUVANT;ADJUVANT;ADJUVANT		Positive	Not Available	Positive	Not Available	Negative	2+	Not Available	Alive		1	3262	1	1313	1313	1	Distant Metastasis	Bone
TCGA-AR-A0U0-01A-11R-A109-07	Tumor	Yes	No	FEMALE	WHITE	73	Post (prior bilateral ovariectomy OR >12 mo since LMP with no prior hysterectomy)	Left Lower Inner Quadrant	Core needle biopsy	Infiltrating Ductal Carcinoma	No	Simple Mastectomy	Sentinel lymph node biopsy plus axillary dissection	Negative	4	2	N1	T2	Stage IIB	M0	YES;YES	Not Available				TNBC	Negative	Not Available	Negative	Not Available	Negative	Not Available	Not Available	Alive	TUMOR FREE	0	1988	0	1988
TCGA-AR-A0U2-01A-11R-A109-07	Tumor	Yes	No	FEMALE	WHITE	47	Pre (<6 months since LMP AND no prior bilateral ovariectomy AND not on estrogen replacement)	Left Lower Outer Quadrant	Incisional Biopsy	Infiltrating Ductal Carcinoma	No	Modified Radical Mastectomy	Axillary lymph node dissection alone	Negative	16	4	N2	T2	Stage IIIA	M0	YES	Not Available	Cytoxan;Paclitaxel;Tamoxifen;Doxorubicin;Exemestane	Not Available;Not Available;Not Available;Not Available;Not Available	ADJUVANT;ADJUVANT;ADJUVANT;ADJUVANT;ADJUVANT		Positive	10-19%	Positive	Not Available	Negative	1+	Not Available	Dead	WITH TUMOR	1	2551	1	1609	1609	1	Distant Metastasis	Bone
TCGA-AR-A0U3-01A-11R-A109-07	Tumor	Yes	No	FEMALE	WHITE	59	Post (prior bilateral ovariectomy OR >12 mo since LMP with no prior hysterectomy)	Left Upper Inner Quadrant;Left Upper Outer Quadrant	Core needle biopsy	Infiltrating Ductal Carcinoma	No	Other	Sentinel lymph node biopsy plus axillary dissection	Negative	4	1	N1	T2	Stage IIB	M0	YES;YES;YES	Not Available	Doxorubicin;Anastrozole;Cytoxan;Paclitaxel	Not Available;Not Available;Not Available;Not Available	ADJUVANT;ADJUVANT;ADJUVANT;ADJUVANT		Positive	10-19%	Positive	Not Available	Negative	1+	Not Available	Alive	TUMOR FREE	0	4080	0	4080
TCGA-AR-A0U4-01A-11R-A109-07	Tumor	Yes	No	FEMALE	WHITE	54	Pre (<6 months since LMP AND no prior bilateral ovariectomy AND not on estrogen replacement)	Left Upper Outer Quadrant	Core needle biopsy	Infiltrating Ductal Carcinoma	No	Simple Mastectomy	Sentinel lymph node biopsy plus axillary dissection	Negative	10	0	N0	T2	Stage IIA	M0	NO;NO;NO	Not Available	Cytoxan;Doxorubicin;Paclitaxel	Not Available;Not Available;Not Available	ADJUVANT;ADJUVANT;ADJUVANT	TNBC	Negative	Not Available	Negative	Not Available	Negative	Not Available	Not Available	Alive	TUMOR FREE	0	3261	0	3261
TCGA-AR-A1AH-01A-11R-A12D-07	Tumor	Yes	No	FEMALE	WHITE	51	Post (prior bilateral ovariectomy OR >12 mo since LMP with no prior hysterectomy)	Right Upper Inner Quadrant	Core needle biopsy	Infiltrating Ductal Carcinoma	No	Other	Axillary lymph node dissection alone	Negative	9	1	N1	T2	Stage IIB	M0	NO;NO	Not Available	Not Available;Tamoxifen	Not Available;Not Available	ADJUVANT;ADJUVANT		Positive	10-19%	Negative	Not Available	Negative	Not Available	Not Available	Alive	TUMOR FREE	0	3807	1	1136	1136	1	New Primary Tumor	Other, specify
TCGA-AR-A1AI-01A-11R-A12P-07	Tumor	Yes	No	FEMALE	WHITE	47	Post (prior bilateral ovariectomy OR >12 mo since LMP with no prior hysterectomy)	Left Upper Outer Quadrant	Fine needle aspiration biopsy	Medullary Carcinoma	No	Simple Mastectomy	Sentinel lymph node biopsy plus axillary dissection	Negative	5	0	N0	T2	Stage IIA	M0	NO;NO	Not Available	Cytoxan;Doxorubicin;Paclitaxel	Not Available;Not Available;Not Available	ADJUVANT;ADJUVANT;ADJUVANT	TNBC	Negative	Not Available	Negative	Not Available	Negative	2+	Not Available	Alive	TUMOR FREE	0	3296	1	588	588	1	New Primary Tumor	Other, specify
TCGA-AR-A1AJ-01A-21R-A12P-07	Tumor	Yes	No	FEMALE	WHITE	83	Post (prior bilateral ovariectomy OR >12 mo since LMP with no prior hysterectomy)	Right	Core needle biopsy	Infiltrating Ductal Carcinoma	No	Other	Sentinel lymph node biopsy plus axillary dissection	Negative	8	0	N0	T1	Stage I	M0	YES;YES	Not Available					Positive	10-19%	Negative	Not Available	Negative	Not Available	Not Available	Alive	TUMOR FREE	0	3072	0	3072
TCGA-AR-A1AK-01A-21R-A12P-07	Tumor	Yes	No	FEMALE	WHITE	70	Post (prior bilateral ovariectomy OR >12 mo since LMP with no prior hysterectomy)	Right	Core needle biopsy	Infiltrating Lobular Carcinoma	No	Simple Mastectomy	Sentinel lymph node biopsy plus axillary dissection	Negative	5	0	N0	T1	Stage I	M0	NO;NO	Not Available	Anastrozole	Not Available	ADJUVANT		Positive	10-19%	Positive	10-19%	Negative	1+	Not Available	Alive	TUMOR FREE	0	3159	0	3159
TCGA-AR-A1AL-01A-21R-A12P-07	Tumor	Yes	No	FEMALE	WHITE	60	Post (prior bilateral ovariectomy OR >12 mo since LMP with no prior hysterectomy)	Left Upper Inner Quadrant;Left Upper Outer Quadrant	Core needle biopsy	Infiltrating Lobular Carcinoma	No	Simple Mastectomy	Sentinel lymph node biopsy plus axillary dissection	Negative	15	3	N1	T3	Stage IIIA	M0	YES;YES	Not Available	Paclitaxel;Cytoxan;Anastrozole;Doxorubicin;Letrozole;Docetaxel	Not Available;Not Available;Not Available;Not Available;Not Available;Not Available	ADJUVANT;ADJUVANT;ADJUVANT;ADJUVANT;ADJUVANT;ADJUVANT		Positive	70-79%	Positive	70-79%	Negative	1+	Not Available	Alive	TUMOR FREE	0	2971	0	2971
TCGA-AR-A1AM-01A-41R-A22K-07	Tumor	Yes	No	FEMALE	WHITE	52	Post (prior bilateral ovariectomy OR >12 mo since LMP with no prior hysterectomy)	Right Upper Outer Quadrant	Core needle biopsy	Infiltrating Lobular Carcinoma	No	Simple Mastectomy	Not Available	Negative	12	1	N1	T3	Stage IIIA	M0	NO;NO;NO	NO	Adriamycin;Tamoxifen;Anastrozole;cytoxan	Not Available;Not Available;Not Available;Unknown	Not Available;Not Available;Not Available;Not Available		Positive	Not Available	Positive	Not Available	Negative	2+	Not Available	Alive	TUMOR FREE	0	2991	0	2991
TCGA-AR-A1AN-01A-11R-A12P-07	Tumor	Yes	No	FEMALE	WHITE	46	Pre (<6 months since LMP AND no prior bilateral ovariectomy AND not on estrogen replacement)	Right Upper Outer Quadrant	Core needle biopsy	Infiltrating Ductal Carcinoma	No	Other	Sentinel lymph node biopsy plus axillary dissection	Negative	5	0	N0	T2	Stage IIA	M0	YES;YES	Not Available	Anastrozole;Anastrozole;Tamoxifen;Cytoxan;Doxorubicin;Paclitaxel	Not Available;Not Available;Not Available;Not Available;Not Available;Not Available	ADJUVANT;ADJUVANT;ADJUVANT;ADJUVANT;ADJUVANT;ADJUVANT		Positive	70-79%	Positive	70-79%	Negative	Not Available	Not Available	Alive	TUMOR FREE	0	2920	0	2920
TCGA-AR-A1AO-01A-11R-A12P-07	Tumor	Yes	No	FEMALE	WHITE	47	Pre (<6 months since LMP AND no prior bilateral ovariectomy AND not on estrogen replacement)	Left Upper Inner Quadrant	Core needle biopsy	Infiltrating Ductal Carcinoma	No	Other	Sentinel lymph node biopsy plus axillary dissection	Negative	39	2	N1	T1	Stage IIA	M0	YES;YES	Not Available	Tamoxifen;Doxorubicin;Cytoxan;Paclitaxel	Not Available;Not Available;Not Available;Not Available	ADJUVANT;ADJUVANT;ADJUVANT;ADJUVANT		Positive	Not Available	Negative	Not Available	Negative	1+	Not Available	Alive	TUMOR FREE	0	2618	0	2618
TCGA-AR-A1AP-01A-11R-A12P-07	Tumor	Yes	No	FEMALE	WHITE	80	Post (prior bilateral ovariectomy OR >12 mo since LMP with no prior hysterectomy)	Left Upper Outer Quadrant	Core needle biopsy	Infiltrating Ductal Carcinoma	No	Other	Sentinel lymph node biopsy plus axillary dissection	Positive	1	0	N0	T1	Stage I	M0	NO;NO	Not Available	Anastrozole	Not Available	ADJUVANT		Positive	70-79%	Positive	<10%	Negative	2+	Not Available	Alive	TUMOR FREE	0	2856	0	2856
TCGA-AR-A1AQ-01A-11R-A12P-07	Tumor	Yes	No	FEMALE	WHITE	49	Post (prior bilateral ovariectomy OR >12 mo since LMP with no prior hysterectomy)	Right Upper Inner Quadrant;Right Upper Outer Quadrant	Core needle biopsy	Infiltrating Ductal Carcinoma	No	Other	Sentinel lymph node biopsy plus axillary dissection	Negative	6	0	N0	T2	Stage IIA	M0	YES;YES	Not Available	Doxorubicin;Paclitaxel;Cytoxan	Not Available;Not Available;Not Available	ADJUVANT;ADJUVANT;ADJUVANT	TNBC	Negative	Not Available	Negative	Not Available	Negative	2+	Not Available	Alive	TUMOR FREE	0	3021	0	3021
TCGA-AR-A1AR-01A-31R-A137-07	Tumor	Yes	No	FEMALE	WHITE	50	Post (prior bilateral ovariectomy OR >12 mo since LMP with no prior hysterectomy)	Left Lower Inner Quadrant	Core needle biopsy	Infiltrating Ductal Carcinoma	No	Lumpectomy	Axillary lymph node dissection alone	Negative	14	5	N2	T1	Stage IIIA	M0	YES;YES	Not Available	Docetaxel;Not Available;Doxorubicin	Not Available;Not Available;Not Available	ADJUVANT;ADJUVANT;ADJUVANT	TNBC	Negative	Not Available	Negative	Not Available	Negative	Not Available	Not Available	Dead	WITH TUMOR	1	524	1	268	268	1	New Primary Tumor	Other, specify
TCGA-AR-A1AS-01A-11R-A12P-07	Tumor	Yes	No	FEMALE	ASIAN	54	Post (prior bilateral ovariectomy OR >12 mo since LMP with no prior hysterectomy)	Left Upper Inner Quadrant	Core needle biopsy	Infiltrating Ductal Carcinoma	No	Other	Axillary lymph node dissection alone	Negative	17	1	N1	T2	Stage IIB	M0	YES;YES	Not Available	Anastrozole;Doxorubicin;Cytoxan	Not Available;Not Available;Not Available	ADJUVANT;ADJUVANT;ADJUVANT		Positive	70-79%	Positive	70-79%	Negative	1+	Not Available	Alive	TUMOR FREE	0	1150	0	1150
TCGA-AR-A1AT-01A-11R-A12P-07	Tumor	Yes	No	FEMALE	WHITE	62	Post (prior bilateral ovariectomy OR >12 mo since LMP with no prior hysterectomy)	Left Upper Outer Quadrant	Core needle biopsy	Infiltrating Lobular Carcinoma	No	Other	Sentinel lymph node biopsy plus axillary dissection	Negative	3	1	N0	T2	Stage IIA	M0	YES	Not Available	Anastrozole;Trastuzumab;Not otherwise specified	Not Available;Not Available;Not Available	ADJUVANT;ADJUVANT;ADJUVANT	Her-2	Positive	<10%	Positive	<10%	Positive	3+	Not Available	Dead		1	1272	0	1272
TCGA-AR-A1AU-01A-11R-A12P-07	Tumor	Yes	No	FEMALE	WHITE	39	Pre (<6 months since LMP AND no prior bilateral ovariectomy AND not on estrogen replacement)	Right Upper Inner Quadrant;Right Upper Outer Quadrant	Core needle biopsy	Infiltrating Ductal Carcinoma	No	Other	Sentinel lymph node biopsy plus axillary dissection	Negative	37	4	N2	T2	Stage IIIA	M0	YES;YES;YES	Not Available	Doxorubicin;Tamoxifen;Cytoxan;Paclitaxel	Not Available;Not Available;Not Available;Not Available	ADJUVANT;ADJUVANT;ADJUVANT;ADJUVANT		Positive	70-79%	Positive	70-79%	Negative	2+	Not Available	Alive	TUMOR FREE	0	2868	0	2868
TCGA-AR-A1AV-01A-21R-A12P-07	Tumor	No	No	MALE	WHITE	68	Post	Left	Core needle biopsy	Infiltrating Ductal Carcinoma	No	Modified Radical Mastectomy	Axillary lymph node dissection alone	Negative	25	1	N1	T2	Stage IIB	M0	YES;YES	Not Available	Tamoxifen;Cytoxan;Doxorubicin;Paclitaxel	Not Available;Not Available;Not Available;Not Available	ADJUVANT;ADJUVANT;ADJUVANT;ADJUVANT		Positive	70-79%	Positive	70-79%	Negative	1+	Not Available	Alive	TUMOR FREE	0	1864	0	1864
TCGA-AR-A1AW-01A-21R-A12P-07	Tumor	Yes	No	FEMALE	WHITE	65	Post (prior bilateral ovariectomy OR >12 mo since LMP with no prior hysterectomy)	Left Upper Inner Quadrant	Incisional Biopsy	Infiltrating Ductal Carcinoma	No	Lumpectomy	Sentinel lymph node biopsy plus axillary dissection	Negative	1	0	N0	T2	Stage IIA	M0	YES;YES;YES	Not Available	Docetaxel;Cytoxan;Anastrozole	Not Available;Not Available;Not Available	ADJUVANT;ADJUVANT;ADJUVANT		Positive	70-79%	Positive	70-79%	Negative	2+	Not Available	Alive	TUMOR FREE	0	2632	0	2632
TCGA-AR-A1AX-01A-11R-A12P-07	Tumor	Yes	No	FEMALE	WHITE	64	Post (prior bilateral ovariectomy OR >12 mo since LMP with no prior hysterectomy)	Left Upper Inner Quadrant;Left Upper Outer Quadrant	Core needle biopsy	Infiltrating Ductal Carcinoma	No	Other	Sentinel lymph node biopsy plus axillary dissection	Negative	8	0	N0	T1	Stage I	M0	YES;YES;YES	Not Available	Trastuzumab;Letrozole;Paclitaxel;Cytoxan;Exemestane;Doxorubicin	Not Available;Not Available;Not Available;Not Available;Not Available;Not Available	ADJUVANT;ADJUVANT;ADJUVANT;ADJUVANT;ADJUVANT;ADJUVANT	Her-2	Positive	Not Available	Positive	70-79%	Positive	3+	Not Available	Alive	TUMOR FREE	0	2629	0	2629
TCGA-AR-A1AY-01A-21R-A12P-07	Tumor	Yes	No	FEMALE	WHITE	65	Post (prior bilateral ovariectomy OR >12 mo since LMP with no prior hysterectomy)	Left Upper Outer Quadrant	Core needle biopsy	Infiltrating Ductal Carcinoma	No	Other	Sentinel lymph node biopsy plus axillary dissection	Negative	4	0	N0	T1	Stage I	M0	YES;YES	Not Available	Doxorubicin;Cytoxan	Not Available;Not Available	ADJUVANT;ADJUVANT	TNBC	Negative	Not Available	Negative	Not Available	Negative	Not Available	Not Available	Alive	TUMOR FREE	0	1026	0	1026
TCGA-AR-A24H-01A-11R-A169-07	Tumor	Yes	No	FEMALE	WHITE	65	Post (prior bilateral ovariectomy OR >12 mo since LMP with no prior hysterectomy)	Right Lower Inner Quadrant;Right Lower Outer Quadrant	Core needle biopsy	Infiltrating Lobular Carcinoma	No	Other	Sentinel lymph node biopsy plus axillary dissection	Negative	4	0	N0	T2	Stage IIA	M0	YES;YES;YES	Not Available	Tamoxifen;Anastrozole	Not Available;Not Available	ADJUVANT;ADJUVANT		Positive	Not Available	Positive	Not Available	Negative	1+	Not Available	Alive	TUMOR FREE	0	4894	0	4894
TCGA-AR-A24K-01A-11R-A169-07	Tumor	Yes	No	FEMALE	WHITE	46	Pre (<6 months since LMP AND no prior bilateral ovariectomy AND not on estrogen replacement)	Left Upper Outer Quadrant	Core needle biopsy	Infiltrating Ductal Carcinoma	No	Other	Sentinel lymph node biopsy plus axillary dissection	Negative	2	0	N0	T2	Stage IIA	M0	YES;YES	Not Available	Paclitaxel;Cytoxan;Doxorubicin	Not Available;Not Available;Not Available	ADJUVANT;ADJUVANT;ADJUVANT		Positive	10-19%	Positive	10-19%	Negative	2+	Not Available	Alive	TUMOR FREE	0	1548	0	1548
TCGA-AR-A24L-01A-11R-A169-07	Tumor	Yes	No	FEMALE	WHITE	26	Pre (<6 months since LMP AND no prior bilateral ovariectomy AND not on estrogen replacement)	Right	Core needle biopsy	Infiltrating Ductal Carcinoma	No	Other	Sentinel lymph node biopsy plus axillary dissection	Negative	12	2	N1	T2	Stage IIB	M0	YES;YES	Not Available	Paclitaxel;Doxorubicin;Cytoxan;Tamoxifen	Not Available;Not Available;Not Available;Not Available	ADJUVANT;ADJUVANT;ADJUVANT;ADJUVANT		Positive	10-19%	Positive	10-19%	Negative	2+	Not Available	Alive	WITH TUMOR	1	2866	1	1414	1414	1	Locoregional Disease
TCGA-AR-A24M-01A-11R-A169-07	Tumor	Yes	No	FEMALE	WHITE	38	Pre (<6 months since LMP AND no prior bilateral ovariectomy AND not on estrogen replacement)	Left Upper Outer Quadrant	Core needle biopsy	Mixed Histology (please specify)	No	Other	Sentinel lymph node biopsy plus axillary dissection	Negative	28	4	N2	T2	Stage IIIA	M0	YES;YES;YES	Not Available	Cytoxan;Tamoxifen;Paclitaxel;Doxorubicin;Letrozole	Not Available;Not Available;Not Available;Not Available;Not Available	ADJUVANT;ADJUVANT;ADJUVANT;ADJUVANT;ADJUVANT		Positive	10-19%	Positive	10-19%	Negative	1+	Not Available	Alive	TUMOR FREE	0	3660	0	3660
TCGA-AR-A24N-01A-11R-A169-07	Tumor	Yes	No	FEMALE	WHITE	54	Peri (6-12 months since last menstrual period)	Left Upper Inner Quadrant	Core needle biopsy	Infiltrating Ductal Carcinoma	No	Simple Mastectomy	Sentinel lymph node biopsy plus axillary dissection	Negative	4	0	N0	T1	Stage I	M0	NO;NO;NO	Not Available					Positive	10-19%	Positive	10-19%	Negative	2+	Not Available	Alive	TUMOR FREE	0	3035	0	3035
TCGA-AR-A24O-01A-11R-A169-07	Tumor	Yes	No	FEMALE	WHITE	43	Pre (<6 months since LMP AND no prior bilateral ovariectomy AND not on estrogen replacement)	Left	Incisional Biopsy	Mixed Histology (please specify)	No	Modified Radical Mastectomy	Not Available	Positive	19	7	N2	T3	Stage IIIA	M0	YES;YES;YES	Not Available	Paclitaxel;Cytoxan;Doxorubicin;Tamoxifen;Letrozole	Not Available;Not Available;Not Available;Not Available;Not Available	ADJUVANT;ADJUVANT;ADJUVANT;ADJUVANT;ADJUVANT		Positive	Not Available	Positive	Not Available	Negative	Not Available	Not Available	Alive	WITH TUMOR	0	3607	1	2561	2561	1
TCGA-AR-A24P-01A-11R-A169-07	Tumor	Yes	No	FEMALE	WHITE	47	Post (prior bilateral ovariectomy OR >12 mo since LMP with no prior hysterectomy)	Left Upper Outer Quadrant	Core needle biopsy	Infiltrating Ductal Carcinoma	No	Other	Sentinel lymph node biopsy plus axillary dissection	Negative	3	0	N0	T1	Stage I	M0	Not Available	Not Available					Positive	10-19%	Positive	10-19%	Negative	2+	Not Available	Alive		0	84	0	84
TCGA-AR-A24Q-01A-12R-A169-07	Tumor	Yes	No	FEMALE	WHITE	49	Post (prior bilateral ovariectomy OR >12 mo since LMP with no prior hysterectomy)	Left Upper Inner Quadrant	Core needle biopsy	Infiltrating Ductal Carcinoma	No	Simple Mastectomy	Sentinel lymph node biopsy plus axillary dissection	Negative	2	0	N0	T3	Stage IIB	M0	YES;YES;YES;YES	Not Available	Trastuzumab;Trastuzumab;Doxorubicin;Anastrozole;Cytoxan;Paclitaxel;Trastuzumab;Docetaxel	Not Available;Not Available;Not Available;Not Available;Not Available;Not Available;Not Available;Not Available	ADJUVANT;ADJUVANT;ADJUVANT;ADJUVANT;ADJUVANT;ADJUVANT;ADJUVANT;ADJUVANT		Positive	<10%	Negative	Not Available	Negative	Not Available	Not Available	Alive	TUMOR FREE	0	3172	0	3172
TCGA-AR-A24R-01A-11R-A169-07	Tumor	Yes	No	FEMALE	WHITE	45	Pre (<6 months since LMP AND no prior bilateral ovariectomy AND not on estrogen replacement)	Right Upper Inner Quadrant;Right Upper Outer Quadrant	Core needle biopsy	Infiltrating Ductal Carcinoma	No	Other	Sentinel lymph node biopsy plus axillary dissection	Negative	28	6	N2	T1	Stage IIIA	M0	YES;YES;YES	Not Available	Letrozole;Cytoxan;Paclitaxel;Doxorubicin;Tamoxifen	Not Available;Not Available;Not Available;Not Available;Not Available	Not Available;ADJUVANT;ADJUVANT;ADJUVANT;ADJUVANT		Positive	10-19%	Positive	10-19%	Negative	1+	Not Available	Alive	TUMOR FREE	0	3430	0	3430
TCGA-AR-A24S-01A-11R-A169-07	Tumor	Yes	No	FEMALE	WHITE	61	Post (prior bilateral ovariectomy OR >12 mo since LMP with no prior hysterectomy)	Right Lower Outer Quadrant	Core needle biopsy	Infiltrating Ductal Carcinoma	No	Other	Sentinel lymph node biopsy plus axillary dissection	Negative	4	0	N0	T1	Stage I	M0	YES	Not Available	Exemestane;Anastrozole	Not Available;Not Available	ADJUVANT;ADJUVANT		Positive	70-79%	Positive	Not Available	Negative	Not Available	Not Available	Alive		0	2976	0	2976
TCGA-AR-A24T-01A-11R-A169-07	Tumor	Yes	No	FEMALE	WHITE	46	Pre (<6 months since LMP AND no prior bilateral ovariectomy AND not on estrogen replacement)	Right Upper Outer Quadrant	Core needle biopsy	Infiltrating Lobular Carcinoma	No	Simple Mastectomy	Sentinel lymph node biopsy plus axillary dissection	Negative	17	15	N3	T3	Stage IIIC	M0	YES;YES;YES	Not Available	Letrozole;Cytoxan;Doxorubicin;Paclitaxel;Tamoxifen	Not Available;Not Available;Not Available;Not Available;Not Available	ADJUVANT;ADJUVANT;ADJUVANT;ADJUVANT;ADJUVANT		Positive	10-19%	Positive	10-19%	Negative	2+	Not Available	Alive	TUMOR FREE	0	3202	0	3202
TCGA-AR-A24U-01A-11R-A169-07	Tumor	Yes	No	FEMALE	WHITE	47	Pre (<6 months since LMP AND no prior bilateral ovariectomy AND not on estrogen replacement)	Left Upper Outer Quadrant;Left Lower Outer Quadrant	Core needle biopsy	Infiltrating Ductal Carcinoma	No	Simple Mastectomy	Sentinel lymph node biopsy plus axillary dissection	Positive	25	2	N1	T1	Stage IIA	M0	YES;YES;YES	Not Available	Doxorubicin;Cytoxan;Paclitaxel;Trustuzumab;Trastuzumab;Trustuzumab	Not Available;Not Available;Not Available;Not Available;Not Available;Not Available	Not Available;Not Available;Not Available;Not Available;Not Available;Not Available	Her-2	Negative	Not Available	Negative	Not Available	Positive	3+	Not Available	Alive	TUMOR FREE	0	3128	0	3128
TCGA-AR-A24V-01A-21R-A169-07	Tumor	Yes	No	FEMALE	WHITE	52	Peri (6-12 months since last menstrual period)	Right Upper Outer Quadrant	Core needle biopsy	Infiltrating Ductal Carcinoma	No	Other	Sentinel lymph node biopsy plus axillary dissection	Negative	2	1	N1	T2	Stage IIB	M0	YES;YES;YES	Not Available	Doxorubicin;Cytoxan;Paclitaxel;Bevacizumab;Tamoxifen;Anastrozole	Not Available;Not Available;Not Available;Not Available;Not Available;Not Available	Not Available;Not Available;Not Available;Not Available;Not Available;Not Available		Positive	80-89%	Positive	<10%	Negative	Not Available	Not Available	Alive	TUMOR FREE	0	3203	0	3203
TCGA-AR-A24W-01A-11R-A169-07	Tumor	Yes	No	FEMALE	WHITE	55	Post (prior bilateral ovariectomy OR >12 mo since LMP with no prior hysterectomy)	Right Lower Inner Quadrant	Core needle biopsy	Infiltrating Ductal Carcinoma	No	Other	Sentinel lymph node biopsy plus axillary dissection	Negative	22	3	N1	T2	Stage IIB	M0	NO;NO	Not Available	Doxorubicin;Cytoxan;Paclitaxel;Letrozole;Anastrozole	Not Available;Not Available;Not Available;Not Available;Not Available	Not Available;Not Available;Not Available;Not Available;Not Available		Positive	Not Available	Positive	Not Available	Negative	Not Available	Not Available	Alive	TUMOR FREE	0	1550	0	1550
TCGA-AR-A24X-01A-11R-A169-07	Tumor	Yes	No	FEMALE	WHITE	52	Pre (<6 months since LMP AND no prior bilateral ovariectomy AND not on estrogen replacement)	Right Upper Inner Quadrant	Core needle biopsy	Mixed Histology (please specify)	No	Simple Mastectomy	Sentinel lymph node biopsy plus axillary dissection	Negative	7	0	N0	T2	Stage IIA	M0	NO;NO;NO	Not Available	Doxorubicin;Cytoxan;Tamoxifen	Not Available;Not Available;Not Available	Not Available;Not Available;Not Available		Positive	80-89%	Positive	90-99%	Negative	2+	Not Available	Alive	TUMOR FREE	0	3004	0	3004
TCGA-AR-A24Z-01A-11R-A169-07	Tumor	Yes	No	FEMALE	WHITE	57	Post (prior bilateral ovariectomy OR >12 mo since LMP with no prior hysterectomy)	Left Upper Outer Quadrant	Core needle biopsy	Infiltrating Ductal Carcinoma	No	Other	Sentinel lymph node biopsy plus axillary dissection	Negative	8	0	N0	T2	Stage IIA	M0	NO;NO;NO	Not Available	Doxorubicin;Cytoxan;Anastrozole	Not Available;Not Available;Not Available	Not Available;Not Available;Not Available		Positive	Not Available	Positive	Not Available	Negative	Not Available	Not Available	Alive	TUMOR FREE	0	3001	0	3001
TCGA-AR-A250-01A-31R-A169-07	Tumor	Yes	No	FEMALE	WHITE	58	Post (prior bilateral ovariectomy OR >12 mo since LMP with no prior hysterectomy)	Left Upper Outer Quadrant	Core needle biopsy	Infiltrating Ductal Carcinoma	No	Other	Sentinel lymph node biopsy plus axillary dissection	Positive	4	0	N0	T2	Stage IIA	M0	NO;NO;NO	Not Available	Doxorubicin;Cytoxan;Paclitaxel;Trastuzumab;Trustuzumab;Trastuzumab;Anastrozole	Not Available;Not Available;Not Available;Not Available;Not Available;Not Available;Not Available	Not Available;Not Available;Not Available;Not Available;Not Available;Not Available;Not Available		Positive	70-79%	Negative	Not Available	Negative	2+	Not Available	Alive	TUMOR FREE	0	2707	0	2707
TCGA-AR-A251-01A-12R-A169-07	Tumor	Yes	No	FEMALE	WHITE	51	Pre (<6 months since LMP AND no prior bilateral ovariectomy AND not on estrogen replacement)	Left Upper Outer Quadrant	Core needle biopsy	Infiltrating Ductal Carcinoma	No	Other	Sentinel lymph node biopsy plus axillary dissection	Positive	7	4	N2	T2	Stage IIIA	M0	YES;YES;YES	Not Available	Doxorubicin;Cytoxan;Paclitaxel;Tamoxifen	Not Available;Not Available;Not Available;Not Available	Not Available;Not Available;Not Available;Not Available		Positive	Not Available	Negative	Not Available	Negative	2+	Not Available	Alive	TUMOR FREE	0	3030	0	3030
TCGA-AR-A252-01A-11R-A169-07	Tumor	Yes	No	FEMALE	WHITE	50	Pre (<6 months since LMP AND no prior bilateral ovariectomy AND not on estrogen replacement)	Left Upper Outer Quadrant;Left Lower Outer Quadrant	Core needle biopsy	Infiltrating Ductal Carcinoma	No	Other	Sentinel lymph node biopsy plus axillary dissection	Negative	4	0	N0	T1	Stage I	M0	YES;YES;YES	Not Available	Doxorubicin;Cytoxan;Tamoxifen	Not Available;Not Available;Not Available	Not Available;Not Available;Not Available		Positive	70-79%	Positive	Not Available	Negative	Not Available	Not Available	Alive	TUMOR FREE	0	2838	0	2838
TCGA-AR-A254-01A-21R-A169-07	Tumor	Yes	No	FEMALE	WHITE	50	Pre (<6 months since LMP AND no prior bilateral ovariectomy AND not on estrogen replacement)	Left Upper Inner Quadrant;Left Lower Inner Quadrant	Other method, specify:	Infiltrating Ductal Carcinoma	No	Other	Sentinel lymph node biopsy plus axillary dissection	Negative	30	9	N2	T2	Stage IIIA	M0	YES;YES;YES	Not Available	Paclitaxel;Abraxane;Fluorouracil;Epirubicin;Cytoxan;Trastuzumab;Trastuzumab;Trastuzumab;Tamoxifen	Not Available;Not Available;Not Available;Not Available;Not Available;Not Available;Not Available;Not Available;Not Available	Not Available;Not Available;Not Available;Not Available;Not Available;Not Available;Not Available;Not Available;Not Available	Her-2	Positive	Not Available	Positive	Not Available	Positive	3+	Not Available	Alive	TUMOR FREE	0	2605	0	2605
TCGA-AR-A255-01A-11R-A169-07	Tumor	Yes	No	FEMALE	WHITE	62	Post (prior bilateral ovariectomy OR >12 mo since LMP with no prior hysterectomy)	Right Lower Inner Quadrant	Core needle biopsy	Infiltrating Ductal Carcinoma	No	Other	Sentinel lymph node biopsy plus axillary dissection	Negative	2	0	N0	T1	Stage I	M0	YES;YES;YES	Not Available	Trastuzumab;Trastuzumab;Anastrozole	Not Available;Not Available;Not Available	Not Available;Not Available;Not Available	Her-2	Positive	Not Available	Positive	Not Available	Positive	3+	Not Available	Alive	TUMOR FREE	0	2161	0	2161
TCGA-AR-A256-01A-11R-A169-07	Tumor	Yes	No	FEMALE	WHITE	45	Pre (<6 months since LMP AND no prior bilateral ovariectomy AND not on estrogen replacement)	Right Lower Inner Quadrant	Fine needle aspiration biopsy	Infiltrating Ductal Carcinoma	No	Other	Sentinel lymph node biopsy plus axillary dissection	Negative	5	0	N0	T2	Stage IIA	M0	NO	Not Available	Doxorubicin;Cytoxan	Not Available;Not Available	Not Available;Not Available	TNBC	Negative	Not Available	Negative	Not Available	Negative	1+	Not Available	Dead		1	2854	1	1640	1640	1	Locoregional Disease
TCGA-AR-A2LE-01A-11R-A180-07	Tumor	Yes	No	FEMALE	WHITE	69	Post (prior bilateral ovariectomy OR >12 mo since LMP with no prior hysterectomy)	Right	Core needle biopsy	Infiltrating Lobular Carcinoma	No	Other	Sentinel node biopsy alone	Negative	2	0	N0	T1	Stage I	M0	YES;YES;YES	Not Available	Tamoxifen	Not Available	Not Available		Positive	Not Available	Negative	Not Available	Negative	Not Available	Not Available	Alive	TUMOR FREE	0	5062	1	4203	4203	1	New Primary Tumor	Other, specify
TCGA-AR-A2LH-01A-31R-A18M-07	Tumor	Yes	No	FEMALE	WHITE	55	Post (prior bilateral ovariectomy OR >12 mo since LMP with no prior hysterectomy)	Right Upper Outer Quadrant	Core needle biopsy	Infiltrating Lobular Carcinoma	No	Modified Radical Mastectomy	Sentinel lymph node biopsy plus axillary dissection	Negative	39	29	N3	T3	Stage III	M0	YES	Not Available	Adriamycin;Cytoxan;Paclitaxel	Not Available;Not Available;Not Available	Not Available;Not Available;Not Available	TNBC	Negative	Not Available	Negative	Not Available	Negative	2+	Not Available	Dead		1	616	1	434	434	1	Distant Metastasis	Bone;Liver
TCGA-AR-A2LJ-01A-12R-A19W-07	Tumor	Yes	No	FEMALE	WHITE	40	Pre (<6 months since LMP AND no prior bilateral ovariectomy AND not on estrogen replacement)	Left	Core needle biopsy	Infiltrating Lobular Carcinoma	No	Other	Sentinel lymph node biopsy plus axillary dissection	Negative	18	1	N1	T3	Stage IIIA	MX	YES;YES;YES	Not Available	Adriamycin;Cytoxan;Paclitaxel;Trastuzumab;Tamoxifen	Not Available;Not Available;Not Available;Not Available;Not Available	Not Available;Not Available;Not Available;Not Available;Not Available	Her-2	Positive	70-79%	Positive	70-79%	Positive	3+	Not Available	Alive	TUMOR FREE	0	2632	0	2632
TCGA-AR-A2LK-01A-11R-A180-07	Tumor	Yes	No	FEMALE	WHITE	62	Post (prior bilateral ovariectomy OR >12 mo since LMP with no prior hysterectomy)	Right Upper Outer Quadrant;Right Lower Outer Quadrant	Core needle biopsy	Infiltrating Lobular Carcinoma	No	Other	Sentinel lymph node biopsy plus axillary dissection	Positive	18	5	N2	T3	Stage III	M0	YES	Not Available	Adriamycin;Cytoxan;Paclitaxel;Anastrozole	Not Available;Not Available;Not Available;Not Available	Not Available;Not Available;Not Available;Not Available		Positive	70-79%	Positive	Not Available	Negative	1+	Not Available	Alive		1	1649	1	1304	1304	1	Distant Metastasis	Bone
TCGA-AR-A2LL-01A-11R-A180-07	Tumor	Yes	No	FEMALE	WHITE	70	Post (prior bilateral ovariectomy OR >12 mo since LMP with no prior hysterectomy)	Left	Core needle biopsy	Infiltrating Lobular Carcinoma	No	Simple Mastectomy	Sentinel lymph node biopsy plus axillary dissection	Negative	4	0	N0	T3	Stage IIB	M0	NO;NO	Not Available	Tamoxifen	Unknown	Not Available		Positive	70-79%	Positive	70-79%	Negative	2+	Not Available	Alive	TUMOR FREE	0	2012	0	2012
TCGA-AR-A2LM-01A-11R-A180-07	Tumor	Yes	No	FEMALE	WHITE	49	Pre (<6 months since LMP AND no prior bilateral ovariectomy AND not on estrogen replacement)	Right	Core needle biopsy	Infiltrating Lobular Carcinoma	No	Simple Mastectomy	Sentinel lymph node biopsy plus axillary dissection	Negative	3	1	N1	T1	Stage II	M0	NO;NO	Not Available	Docetaxel;Cytoxan;Abraxane;Tamoxifen	Not Available;Not Available;Not Available;Not Available	Not Available;Not Available;Not Available;Not Available		Positive	70-79%	Positive	70-79%	Negative	Not Available	Not Available	Alive	TUMOR FREE	0	1935	0	1935
TCGA-AR-A2LN-01A-21R-A18M-07	Tumor	Yes	No	FEMALE	WHITE	65	Post (prior bilateral ovariectomy OR >12 mo since LMP with no prior hysterectomy)	Right Upper Outer Quadrant	Core needle biopsy	Infiltrating Lobular Carcinoma	No	Other	Sentinel lymph node biopsy plus axillary dissection	Negative	2	0	N0	T2	Stage IIA	M0	NO;NO	Not Available	Letrozole	Not Available	Not Available		Positive	70-79%	Positive	70-79%	Negative	1+	Not Available	Alive	TUMOR FREE	0	1161	0	1161
TCGA-AR-A2LO-01A-31R-A18M-07	Tumor	Yes	No	FEMALE	WHITE	46	Pre (<6 months since LMP AND no prior bilateral ovariectomy AND not on estrogen replacement)	Left Lower Outer Quadrant	Core needle biopsy	Infiltrating Lobular Carcinoma	No	Simple Mastectomy	Sentinel lymph node biopsy plus axillary dissection	Negative	16	1	N1	T2	Stage IIB	M0	YES;YES	Not Available	Adriamycin;Cytoxan;Paclitaxel;Bevacizumab;Tamoxifen;Anastrozole	Not Available;Not Available;Not Available;Not Available;Not Available;Not Available	Not Available;Not Available;Not Available;Not Available;Not Available;Not Available		Positive	70-79%	Positive	Not Available	Negative	2+	Not Available	Alive	TUMOR FREE	0	1198	0	1198
TCGA-AR-A2LQ-01A-22R-A18M-07	Tumor	Yes	No	FEMALE	WHITE	59	Post (prior bilateral ovariectomy OR >12 mo since LMP with no prior hysterectomy)	Right Upper Inner Quadrant;Right Upper Outer Quadrant	Core needle biopsy	Infiltrating Lobular Carcinoma	No	Simple Mastectomy	Sentinel lymph node biopsy plus axillary dissection	Negative	3	0	N0	T3	Stage IIB	M0	YES;YES	Not Available	Docetaxel;Cytoxan;Anastrozole	Not Available;Not Available;Not Available	Not Available;Not Available;Not Available		Positive	70-79%	Positive	<10%	Negative	1+	Not Available	Alive	TUMOR FREE	0	1233	0	1233
TCGA-AR-A2LR-01A-12R-A18M-07	Tumor	Yes	No	FEMALE	WHITE	49	Post (prior bilateral ovariectomy OR >12 mo since LMP with no prior hysterectomy)	Right	Core needle biopsy	Metaplastic Carcinoma	No	Simple Mastectomy	Sentinel lymph node biopsy plus axillary dissection	Negative	4	0	N0	T1	Stage I	M0	NO;NO	Not Available	Adriamycin;Cytoxan	Not Available;Not Available	Not Available;Not Available	TNBC	Negative	Not Available	Negative	Not Available	Negative	Not Available	Not Available	Alive	TUMOR FREE	0	1742	0	1742
TCGA-AR-A5QM-01A-11R-A27Q-07	Tumor	Yes	No	FEMALE	WHITE	62	Post (prior bilateral ovariectomy OR >12 mo since LMP with no prior hysterectomy)	Left	Core needle biopsy	Infiltrating Lobular Carcinoma	No	Other	Sentinel lymph node biopsy plus axillary dissection	Not Available	9	0	N0	T2	Stage IIA	M0	YES;YES	YES	Anastrozole	Not Available	Not Available		Positive	Not Available	Positive	Not Available	Negative	2+	Not Available	Alive	TUMOR FREE	0	2231	1	968	968	1	New Primary Tumor	Other, specify
TCGA-AR-A5QN-01A-12R-A28M-07	Tumor	Yes	No	FEMALE	WHITE	68	Post (prior bilateral ovariectomy OR >12 mo since LMP with no prior hysterectomy)	Left	Core needle biopsy	Infiltrating Lobular Carcinoma	No	Modified Radical Mastectomy	Axillary lymph node dissection alone	Not Available	19	10	N3	T2	Stage IIIC	M0	YES;YES	YES	Taxotere;Cytoxan;Anastrozole;Exemestane	Not Available;Not Available;Not Available;Not Available	Not Available;Not Available;Not Available;Not Available	Her-2	Positive	Not Available	Positive	Not Available	Positive	3+	Not Available	Alive	TUMOR FREE	0	1013	0	1013
TCGA-AR-A5QP-01A-11R-A28M-07	Tumor	Yes	No	FEMALE	WHITE	54	Post (prior bilateral ovariectomy OR >12 mo since LMP with no prior hysterectomy)	Left	Not Available	Infiltrating Lobular Carcinoma	No	Lumpectomy	Sentinel lymph node biopsy plus axillary dissection	Not Available	40	1	N1	T2	Stage IIB	M0	YES;YES	YES	Tamoxifen	Not Available	Not Available		Positive	Not Available	Positive	Not Available	Negative	2+	Not Available	Alive	TUMOR FREE	0	1185	0	1185
TCGA-AR-A5QQ-01A-11R-A28M-07	Tumor	Yes	No	FEMALE	WHITE	68	Post (prior bilateral ovariectomy OR >12 mo since LMP with no prior hysterectomy)	Right	Core needle biopsy	Other, specify	No	Modified Radical Mastectomy	Axillary lymph node dissection alone	Not Available	24	1	N1	T3	Stage IIIA	M0	YES	YES	Carboplatin;Taxol;Ifosfamide;MESNA-1;MESNA-2;VP-16	Not Available;Not Available;Not Available;Not Available;Not Available;Not Available	Not Available;Not Available;Not Available;Not Available;Not Available;Not Available	TNBC	Negative	Not Available	Negative	Not Available	Negative	1+	Not Available	Dead	WITH TUMOR	1	322	1	301	301	1	Distant Metastasis;Locoregional Recurrence	Lung;Other, specify;Liver;Bone
TCGA-B6-A0I1-01A-11R-A21T-07	Tumor	Yes	No	FEMALE	BLACK OR AFRICAN AMERICAN	73	Post (prior bilateral ovariectomy OR >12 mo since LMP with no prior hysterectomy)	Left Upper Outer Quadrant	Incisional Biopsy	Infiltrating Ductal Carcinoma	No	Modified Radical Mastectomy	Axillary lymph node dissection alone	Negative	7	0	N0	T2	Stage IIA	M0	NO	Not Available				TNBC	Negative	Not Available	Negative	Not Available	Negative	Not Available	Not Available	Dead	TUMOR FREE	1	2361	1	1120	1120	1	Distant Metastasis	Lung
TCGA-B6-A0I2-01A-11R-A034-07	Tumor	Yes	No	FEMALE	WHITE	45	Pre	Left Upper Outer Quadrant;Left	Excisional Biopsy	Infiltrating Ductal Carcinoma	No	Not Available	Axillary lymph node dissection alone	Not Available	8	0	N0 (i-)	T1c	Stage IA	M0	YES	Not Available				TNBC	Negative	Not Available	Negative	Not Available	Negative	Not Available	Not Available	Alive	TUMOR FREE	0	4361	0	4361
TCGA-B6-A0I5-01A-11R-A034-07	Tumor	Yes	No	FEMALE	WHITE	49	Pre	Right Lower Inner Quadrant	Other method, specify:	Infiltrating Ductal Carcinoma	No	Other	Axillary lymph node dissection alone	Negative	13	5	N1b	T2	Stage IIB	M0	NO;NO	Not Available					Positive	Not Available	Positive	Not Available	Negative	Not Available	Not Available	Alive	TUMOR FREE	0	8556	0	8556
TCGA-B6-A0I6-01A-11R-A034-07	Tumor	Yes	No	FEMALE	BLACK OR AFRICAN AMERICAN	49	Pre	Left Upper Outer Quadrant;Left	Other method, specify:	Infiltrating Ductal Carcinoma	No	Modified Radical Mastectomy	Axillary lymph node dissection alone	Negative	32	6	N1	T1c	Stage IIA	M0	NO	Not Available				TNBC	Negative	Not Available	Negative	Not Available	Negative	Not Available	Not Available	Dead	WITH TUMOR	1	991	1	859	859	1	Distant Metastasis	Other, specify
TCGA-B6-A0I8-01A-11R-A034-07	Tumor	Yes	No	FEMALE	WHITE	46	Pre	Right Upper Inner Quadrant;Right	Other method, specify:	Infiltrating Ductal Carcinoma	No	Not Available	No axillary staging	Not Available	0	Not Available	NX	T1	Stage X	M0	NO	Not Available				TNBC	Negative	Not Available	Negative	Not Available	Negative	Not Available	Not Available	Dead	WITH TUMOR	1	749	1	746	746	1	Locoregional Disease	Other, specify
TCGA-B6-A0I9-01A-11R-A034-07	Tumor	Yes	No	FEMALE	WHITE	62	Post	Left Lower Outer Quadrant;Left	Other method, specify:	Infiltrating Ductal Carcinoma	No	Not Available	No axillary staging	Not Available	Not Available	Not Available	NX	T3	Stage IV	M1	YES	Not Available					Negative	Not Available	Positive	Not Available	Negative	Not Available	Not Available	Dead	WITH TUMOR	1	362	1	362
TCGA-B6-A0IA-01A-11R-A034-07	Tumor	Yes	No	FEMALE	WHITE	51	Not Available	Right	Other method, specify:	Other, specify	No	Other	Axillary lymph node dissection alone	Negative	15	0	N0 (i-)	T2	Stage IIA	M0	NO;NO	Not Available					Positive	Not Available	Positive	Not Available	Negative	Not Available	Not Available	Alive	TUMOR FREE	0	8391	0	8391
TCGA-B6-A0IB-01A-11R-A034-07	Tumor	Yes	No	FEMALE	WHITE	64	Post	Right Upper Inner Quadrant;Right	Other method, specify:	Infiltrating Ductal Carcinoma	No	Modified Radical Mastectomy	Axillary lymph node dissection alone	Negative	15	8	N3	T3	Stage IV	M1	NO	Not Available					Positive	Not Available	Positive	Not Available	Negative	Not Available	Not Available	Dead	WITH TUMOR	1	3941	1	2717	2717	1	Distant Metastasis	Other, specify
TCGA-B6-A0IC-01A-11R-A034-07	Tumor	Yes	No	FEMALE	WHITE	90	Post (prior bilateral ovariectomy OR >12 mo since LMP with no prior hysterectomy)	Right	Fine needle aspiration biopsy	Other, specify	No	Other	No axillary staging	Negative	Not Available	Not Available	NX	T2	Stage X	MX	NO	Not Available					Positive	Not Available	Positive	Not Available	Negative	Not Available	Not Available	Dead	TUMOR FREE	1	1542	0	1542
TCGA-B6-A0IE-01A-11R-A034-07	Tumor	Yes	No	FEMALE	BLACK OR AFRICAN AMERICAN	38	Pre (<6 months since LMP AND no prior bilateral ovariectomy AND not on estrogen replacement)	Left Upper Outer Quadrant;Left	Incisional Biopsy	Mixed Histology (please specify)	No	Other	Axillary lymph node dissection alone	Close	24	6	N1b	T3	Stage IIIA	M0	YES	Not Available				TNBC	Negative	Not Available	Negative	Not Available	Negative	Not Available	Not Available	Dead	WITH TUMOR	1	1993	1	834	834	1	Distant Metastasis	Bone
TCGA-B6-A0IG-01A-11R-A034-07	Tumor	Yes	No	FEMALE	WHITE	50	Not Available	Left	Other method, specify:	Infiltrating Ductal Carcinoma	No	Modified Radical Mastectomy	Axillary lymph node dissection alone	Negative	16	4	N1b	T2	Stage IIB	M0	YES	Not Available					Positive	Not Available	Positive	Not Available	Negative	Not Available	Not Available	Dead	WITH TUMOR	1	4456	1	4456
TCGA-B6-A0IH-01A-11R-A115-07	Tumor	Yes	No	FEMALE	WHITE	81	Post (prior bilateral ovariectomy OR >12 mo since LMP with no prior hysterectomy)	Left Upper Outer Quadrant;Left	Fine needle aspiration biopsy	Infiltrating Lobular Carcinoma	No	Other	Axillary lymph node dissection alone	Positive	27	25	N1b	T3	Stage IIIA	M0	YES	Not Available					Positive	Not Available	Positive	Not Available	Negative	Not Available	Not Available	Dead		1	3418	0	3418
TCGA-B6-A0IJ-01A-11R-A034-07	Tumor	Yes	No	FEMALE	BLACK OR AFRICAN AMERICAN	42	Pre	Right Upper Outer Quadrant;Right	Excisional Biopsy	Infiltrating Ductal Carcinoma	No	Modified Radical Mastectomy	Axillary lymph node dissection alone	Negative	27	0	N0 (i-)	T3	Stage IIB	M0	NO;NO	Not Available					Positive	Not Available	Positive	Not Available	Negative	Not Available	Not Available	Alive	TUMOR FREE	0	7106	0	7106
TCGA-B6-A0IK-01A-12R-A056-07	Tumor	Yes	No	FEMALE	WHITE	63	Post	Left	Other method, specify:	Infiltrating Ductal Carcinoma	No	Lumpectomy	Not Available	Positive	14	1	N1	T4	Stage IIIB	M0	NO	Not Available				TNBC	Negative	Not Available	Negative	Not Available	Negative	Not Available	Not Available	Dead	WITH TUMOR	1	571	1	489	489	1	Distant Metastasis	Brain
TCGA-B6-A0IM-01A-11R-A034-07	Tumor	Yes	No	FEMALE	BLACK OR AFRICAN AMERICAN	75	Post (prior bilateral ovariectomy OR >12 mo since LMP with no prior hysterectomy)	Right Upper Outer Quadrant;Right	Fine needle aspiration biopsy	Other, specify	No	Lumpectomy	Axillary lymph node dissection alone	Positive	9	0	N0 (i-)	T3	Stage IIB	M0	NO	Not Available					Positive	Not Available	Positive	Not Available	Negative	Not Available	Not Available	Alive	TUMOR FREE	1	3873	0	3873
TCGA-B6-A0IN-01A-11R-A034-07	Tumor	Yes	No	FEMALE	WHITE	45	Pre	Right Upper Outer Quadrant;Right	Fine needle aspiration biopsy	Other, specify	No	Other	No axillary staging	Positive	Not Available	Not Available	NX	T1c	Stage X	MX	NO	Not Available					Positive	Not Available	Negative	Not Available	Negative	Not Available	Not Available	Dead	WITH TUMOR	1	2573	1	1412	1412	1	Distant Metastasis	Other, specify
TCGA-B6-A0IO-01A-11R-A034-07	Tumor	Yes	No	FEMALE	WHITE	66	Post	Left	Core needle biopsy	Infiltrating Ductal Carcinoma	No	Modified Radical Mastectomy	Axillary lymph node dissection alone	Negative	17	0	N0 (i-)	T2	Stage IIA	M0	NO;NO	Not Available					Positive	Not Available	Negative	Not Available	Negative	Not Available	Not Available	Alive	TUMOR FREE	0	5042	0	5042
TCGA-B6-A0IP-01A-11R-A034-07	Tumor	Yes	No	FEMALE	WHITE	74	Post (prior bilateral ovariectomy OR >12 mo since LMP with no prior hysterectomy)	Left Upper Outer Quadrant	Fine needle aspiration biopsy	Infiltrating Lobular Carcinoma	No	Modified Radical Mastectomy	Axillary lymph node dissection alone	Negative	16	0	N0 (i-)	T1c	Stage IA	M0	NO;Unknown	Not Available					Positive	Not Available	Positive	Not Available	Negative	Not Available	Not Available	Alive	TUMOR FREE	1	3926	0	3926
TCGA-B6-A0IQ-01A-11R-A034-07	Tumor	Yes	No	FEMALE	WHITE	40	Pre	Left Upper Outer Quadrant;Left	Other method, specify:	Infiltrating Ductal Carcinoma	No	Modified Radical Mastectomy	Axillary lymph node dissection alone	Negative	26	1	N1b	T3	Stage IIIA	M0	YES	Not Available				TNBC	Negative	Not Available	Negative	Not Available	Negative	Not Available	Not Available	Alive	TUMOR FREE	0	4285	0	4285
TCGA-B6-A0RE-01A-11R-A056-07	Tumor	Yes	No	FEMALE	BLACK OR AFRICAN AMERICAN	61	Post	Right Upper Outer Quadrant;Right	Other method, specify:	Infiltrating Ductal Carcinoma	No	Modified Radical Mastectomy	Axillary lymph node dissection alone	Negative	14	0	N0 (i-)	TX	Stage X	M0	YES;YES	Not Available				TNBC	Negative	Not Available	Negative	Not Available	Negative	Not Available	Not Available	Alive	TUMOR FREE	0	7777	0	7777
TCGA-B6-A0RG-01A-11R-A056-07	Tumor	Yes	No	FEMALE	WHITE	26	Pre	Left	Other method, specify:	Infiltrating Ductal Carcinoma	No	Lumpectomy	Axillary lymph node dissection alone	Negative	19	0	N0 (i-)	T3	Stage IIB	M0	NO	Not Available				TNBC	Negative	Not Available	Negative	Not Available	Negative	Not Available	Not Available	Alive	TUMOR FREE	0	2082	0	2082
TCGA-B6-A0RH-01A-21R-A115-07	Tumor	Yes	No	FEMALE	BLACK OR AFRICAN AMERICAN	51	Peri (6-12 months since last menstrual period)	Left Lower Inner Quadrant	Incisional Biopsy	Infiltrating Ductal Carcinoma	No	Modified Radical Mastectomy	Axillary lymph node dissection alone	Positive	23	0	N0 (i-)	T2	Stage IIA	M0	NO;NO	Not Available					Positive	Not Available	Positive	Not Available	Negative	Not Available	Not Available	Alive	TUMOR FREE	1	6456	1	2165	2165	1	Locoregional Disease	Other, specify
TCGA-B6-A0RI-01A-11R-A056-07	Tumor	Yes	No	FEMALE	WHITE	44	Pre	Right Upper Outer Quadrant;Right	Other method, specify:	Infiltrating Ductal Carcinoma	No	Modified Radical Mastectomy	Axillary lymph node dissection alone	Negative	15	6	N1b	T4b	Stage IIIB	M0	YES	Not Available					Positive	Not Available	Positive	Not Available	Negative	Not Available	Not Available	Alive	WITH TUMOR	0	7126	1	1100	1100	1	Locoregional Disease	Other, specify
TCGA-B6-A0RL-01A-11R-A084-07	Tumor	Yes	No	FEMALE	BLACK OR AFRICAN AMERICAN	60	Post	Left	Fine needle aspiration biopsy	Infiltrating Ductal Carcinoma	No	Modified Radical Mastectomy	Axillary lymph node dissection alone	Negative	16	0	N0 (i-)	T2	Stage IIA	M0	NO	Not Available					Positive	Not Available	Positive	Not Available	Negative	Not Available	Not Available	Dead	TUMOR FREE	1	2469	0	2469
TCGA-B6-A0RM-01A-11R-A084-07	Tumor	Yes	No	FEMALE	BLACK OR AFRICAN AMERICAN	57	Peri (6-12 months since last menstrual period)	Left	Other method, specify:	Infiltrating Ductal Carcinoma	No	Not Available	No axillary staging	Not Available	0	Not Available	NX	TX	Stage X	MX	NO	Not Available					Positive	Not Available	Positive	Not Available	Negative	Not Available	Not Available	Dead	TUMOR FREE	1	2373	0	2373
TCGA-B6-A0RN-01A-12R-A084-07	Tumor	Yes	No	FEMALE	WHITE	60	Post (prior bilateral ovariectomy OR >12 mo since LMP with no prior hysterectomy)	Right Upper Inner Quadrant;Right	Other method, specify:	Infiltrating Ductal Carcinoma	No	Modified Radical Mastectomy	Axillary lymph node dissection alone	Negative	19	0	N0 (i-)	T1c	Stage IA	M0	YES;YES	Not Available				TNBC	Negative	Not Available	Negative	Not Available	Negative	Not Available	Not Available	Alive	TUMOR FREE	0	8008	0	8008
TCGA-B6-A0RO-01A-22R-A084-07	Tumor	Yes	No	FEMALE	WHITE	71	Post (prior bilateral ovariectomy OR >12 mo since LMP with no prior hysterectomy)	Right	Other method, specify:	Infiltrating Ductal Carcinoma	No	Modified Radical Mastectomy	Axillary lymph node dissection alone	Negative	17	2	N1a	T4	Stage IIIB	M0	NO	Not Available					Positive	Not Available	Positive	Not Available	Negative	Not Available	Not Available	Alive	TUMOR FREE	0	4929	0	4929
TCGA-B6-A0RP-01A-21R-A084-07	Tumor	Yes	No	FEMALE	WHITE	73	Post (prior bilateral ovariectomy OR >12 mo since LMP with no prior hysterectomy)	Left Upper Outer Quadrant;Left	Other method, specify:	Mixed Histology (please specify)	No	Lumpectomy	Axillary lymph node dissection alone	Positive	15	2	N1b	T2	Discrepancy	M0	NO	Not Available					Positive	Not Available	Positive	Not Available	Negative	Not Available	Not Available	Dead	WITH TUMOR	1	3126	1	2787	2787	1	Distant Metastasis	Bone
TCGA-B6-A0RQ-01A-11R-A115-07	Tumor	Yes	No	FEMALE	WHITE	68	Post (prior bilateral ovariectomy OR >12 mo since LMP with no prior hysterectomy)	Right Upper Outer Quadrant;Right	Fine needle aspiration biopsy	Infiltrating Lobular Carcinoma	No	Other	Axillary lymph node dissection alone	Not Available	14	0	N0 (i-)	T3	Stage IIB	M0	NO	Not Available					Positive	Not Available	Positive	Not Available	Negative	Not Available	Not Available	Dead	TUMOR FREE	1	4267	0	4267
TCGA-B6-A0RS-01A-11R-A084-07	Tumor	Yes	No	FEMALE	WHITE	38	Pre	Left Lower Inner Quadrant;Left	Other method, specify:	Infiltrating Ductal Carcinoma	No	Modified Radical Mastectomy	Axillary lymph node dissection alone	Negative	15	0	N0 (i-)	T2	Stage IIA	M0	NO	Not Available				TNBC	Negative	Not Available	Negative	Not Available	Negative	Not Available	Not Available	Dead	WITH TUMOR	1	3063	1	2041	2041	1	New Primary Tumor	Other, specify
TCGA-B6-A0RT-01A-21R-A084-07	Tumor	Yes	No	FEMALE	WHITE	39	Pre	Right Upper Outer Quadrant;Right	Fine needle aspiration biopsy	Infiltrating Ductal Carcinoma	No	Modified Radical Mastectomy	Axillary lymph node dissection alone	Close	23	1	N1	T3	Stage IIIA	M0	YES	Not Available				TNBC	Negative	Not Available	Negative	Not Available	Negative	Not Available	Not Available	Alive	TUMOR FREE	0	2721	0	2721
TCGA-B6-A0RU-01A-11R-A084-07	Tumor	Yes	No	FEMALE	WHITE	40	Pre	Right	Tumor resection	Other, specify	No	Other	Axillary lymph node dissection alone	Negative	15	0	N0 (i-)	T1c	Stage IA	M0	YES;YES	Not Available				TNBC	Negative	Not Available	Negative	Not Available	Negative	Not Available	Not Available	Alive	TUMOR FREE	0	8605	1	3076	3076	1	New Primary Tumor	Other, specify
TCGA-B6-A0RV-01A-11R-A084-07	Tumor	Yes	No	FEMALE	WHITE	42	Pre	Right	Incisional Biopsy	Mixed Histology (please specify)	No	Modified Radical Mastectomy	Axillary lymph node dissection alone	Negative	10	5	N2	T3	Stage IIIA	M0	YES	Not Available					Positive	Not Available	Positive	Not Available	Negative	Not Available	Not Available	Alive	TUMOR FREE	0	5156	0	5156
TCGA-B6-A0WS-01A-11R-A115-07	Tumor	Yes	No	FEMALE	BLACK OR AFRICAN AMERICAN	58	Peri (6-12 months since last menstrual period)	Left Upper Outer Quadrant;Left	Fine needle aspiration biopsy	Infiltrating Ductal Carcinoma	No	Lumpectomy	No axillary staging	Positive	Not Available	Not Available	NX	T1c	Stage X	MX	NO	Not Available					Positive	Not Available	Positive	Not Available	Negative	Not Available	Not Available	Dead	TUMOR FREE	1	2965	0	2965
TCGA-B6-A0WT-01A-11R-A109-07	Tumor	Yes	No	FEMALE	WHITE	61	Post (prior bilateral ovariectomy OR >12 mo since LMP with no prior hysterectomy)	Left Lower Inner Quadrant;Left	Fine needle aspiration biopsy	Infiltrating Ductal Carcinoma	No	Modified Radical Mastectomy	Axillary lymph node dissection alone	Negative	15	1	N1	T2	Stage IIB	M0	NO	Not Available					Positive	Not Available	Positive	Not Available	Negative	Not Available	Not Available	Alive	TUMOR FREE	0	5739	1	3862	3862	1	New Primary Tumor	Other, specify
TCGA-B6-A0WV-01A-11R-A109-07	Tumor	Yes	No	FEMALE	WHITE	67	Post (prior bilateral ovariectomy OR >12 mo since LMP with no prior hysterectomy)	Right	Incisional Biopsy	Infiltrating Ductal Carcinoma	No	Modified Radical Mastectomy	Axillary lymph node dissection alone	Negative	7	4	N1b	T2	Stage IIB	M0	NO	Not Available					Positive	Not Available	Positive	Not Available	Negative	Not Available	Not Available	Dead	TUMOR FREE	1	2417	0	2417
TCGA-B6-A0WW-01A-11R-A109-07	Tumor	Yes	No	FEMALE	BLACK OR AFRICAN AMERICAN	58	Peri (6-12 months since last menstrual period)	Right Upper Inner Quadrant;Right	Incisional Biopsy	Infiltrating Ductal Carcinoma	No	Modified Radical Mastectomy	Axillary lymph node dissection alone	Negative	18	5	N1b	T2	Stage X	MX	YES	Not Available					Positive	Not Available	Positive	Not Available	Negative	Not Available	Not Available	Dead	WITH TUMOR	1	558	1	447	447	1	Distant Metastasis	Liver
TCGA-B6-A0WX-01A-11R-A109-07	Tumor	Yes	No	FEMALE	BLACK OR AFRICAN AMERICAN	40	Pre (<6 months since LMP AND no prior bilateral ovariectomy AND not on estrogen replacement)	Left	Excisional Biopsy	Other, specify	No	Modified Radical Mastectomy	Axillary lymph node dissection alone	Negative	21	9	N1b	T3	Stage IIIA	M0	NO	Not Available				TNBC	Negative	Not Available	Negative	Not Available	Negative	Not Available	Not Available	Dead	WITH TUMOR	1	639	1	563	563	1	Distant Metastasis	Bone
TCGA-B6-A0WY-01A-11R-A109-07	Tumor	Yes	No	FEMALE	WHITE	40	Pre (<6 months since LMP AND no prior bilateral ovariectomy AND not on estrogen replacement)	Left Lower Inner Quadrant;Left	Core needle biopsy	Infiltrating Ductal Carcinoma	No	Lumpectomy	Axillary lymph node dissection alone	Negative	21	3	N1b	T3	Stage IIIA	M0	YES	Not Available					Positive	Not Available	Negative	Not Available	Negative	Not Available	Not Available	Dead	WITH TUMOR	1	3461	1	2011	2011	1	Distant Metastasis	Bone
TCGA-B6-A0WZ-01A-11R-A109-07	Tumor	Yes	No	FEMALE	BLACK OR AFRICAN AMERICAN	50	Not Available	Right Upper Inner Quadrant;Right	Fine needle aspiration biopsy	Infiltrating Ductal Carcinoma	No	Other	Axillary lymph node dissection alone	Negative	21	11	N1b	T2	Stage II	M0	YES;YES	Not Available					Positive	Not Available	Positive	Not Available	Negative	Not Available	Not Available	Alive	TUMOR FREE	0	6292	1	5117	5117	1	New Primary Tumor	Bone
TCGA-B6-A0X0-01A-21R-A115-07	Tumor	Yes	No	FEMALE	WHITE	54	Peri (6-12 months since last menstrual period)	Right Upper Outer Quadrant;Right	Fine needle aspiration biopsy	Other, specify	No	Modified Radical Mastectomy	Axillary lymph node dissection alone	Negative	31	0	N0 (i-)	T1c	Stage I	M0	NO	Not Available					Positive	Not Available	Positive	Not Available	Negative	Not Available	Not Available	Dead		1	3945	0	3945
TCGA-B6-A0X1-01A-11R-A109-07	Tumor	Yes	No	FEMALE	WHITE	48	Pre	Left	Fine needle aspiration biopsy	Infiltrating Ductal Carcinoma	No	Other	Axillary lymph node dissection alone	Negative	21	16	N1	T2	Discrepancy	M1	NO;NO	Not Available				TNBC	Negative	Not Available	Negative	Not Available	Negative	Not Available	Not Available	Alive	TUMOR FREE	1	7455	1	490	490	1	Distant Metastasis	Brain
TCGA-B6-A0X4-01A-11R-A109-07	Tumor	Yes	No	FEMALE	WHITE	62	Post (prior bilateral ovariectomy OR >12 mo since LMP with no prior hysterectomy)	Left	Incisional Biopsy	Infiltrating Ductal Carcinoma	No	Modified Radical Mastectomy	Axillary lymph node dissection alone	Negative	21	2	N1b	T2	Stage IIB	M0	NO	Not Available					Positive	Not Available	Positive	Not Available	Negative	Not Available	Not Available	Dead	WITH TUMOR	1	860	1	716	716	1	Distant Metastasis	Bone
TCGA-B6-A0X5-01A-21R-A109-07	Tumor	Yes	No	FEMALE	BLACK OR AFRICAN AMERICAN	61	Post (prior bilateral ovariectomy OR >12 mo since LMP with no prior hysterectomy)	Left	Not Available	Infiltrating Ductal Carcinoma	No	Modified Radical Mastectomy	Axillary lymph node dissection alone	Negative	14	3	N1b	T2	Stage IIB	M0	NO	Not Available					Positive	Not Available	Positive	Not Available	Negative	Not Available	Not Available	Dead	WITH TUMOR	1	2097	1	1343	1343	1	Distant Metastasis	Other, specify
TCGA-B6-A0X7-01A-11R-A10J-07	Tumor	Yes	No	FEMALE	WHITE	62	Post (prior bilateral ovariectomy OR >12 mo since LMP with no prior hysterectomy)	Right	Excisional Biopsy	Mixed Histology (please specify)	No	Not Available	No axillary staging	Not Available	0	Not Available	NX	T1c	Stage X	MX	YES	Not Available					Positive	Not Available	Positive	Not Available	Negative	Not Available	Not Available	Dead	TUMOR FREE	1	1781	1	1104	1104	1	New Primary Tumor	Other, specify
TCGA-B6-A1KC-01B-11R-A157-07	Tumor	Yes	No	FEMALE	WHITE	67	Post (prior bilateral ovariectomy OR >12 mo since LMP with no prior hysterectomy)	Right Lower Outer Quadrant	Core needle biopsy	Infiltrating Ductal Carcinoma	No	Lumpectomy	Sentinel node biopsy alone	Negative	2	1	N1	T2	Stage IIB	M0	YES	Not Available					Positive	Not Available	Negative	Not Available	Negative	Not Available	Not Available	Alive	TUMOR FREE	0	1326	0	1326
TCGA-B6-A1KF-01A-11R-A13Q-07	Tumor	Yes	No	FEMALE	WHITE	68	Post (prior bilateral ovariectomy OR >12 mo since LMP with no prior hysterectomy)	Right Lower Outer Quadrant	Fine needle aspiration biopsy	Infiltrating Ductal Carcinoma	No	Other	Axillary lymph node dissection alone	Negative	14	2	N1	T2	Stage IIB	M0	YES	Not Available				TNBC	Negative	Not Available	Negative	Not Available	Negative	2+	Not Available	Alive	TUMOR FREE	0	3088	0	3088
TCGA-B6-A1KI-01A-11R-A14M-07	Tumor	Yes	No	FEMALE	WHITE	63	Post (prior bilateral ovariectomy OR >12 mo since LMP with no prior hysterectomy)	Right Upper Inner Quadrant	Core needle biopsy	Infiltrating Ductal Carcinoma	No	Other	Sentinel node biopsy alone	Negative	1	0	N0	T1c	Stage I	M0	YES	Not Available					Positive	Not Available	Positive	Not Available	Negative	2+	1.2	Alive	TUMOR FREE	0	2236	0	2236
TCGA-B6-A1KN-01A-11R-A13Q-07	Tumor	Yes	No	FEMALE	WHITE	57	Post (prior bilateral ovariectomy OR >12 mo since LMP with no prior hysterectomy)	Right Upper Inner Quadrant	Core needle biopsy	Infiltrating Ductal Carcinoma	No	Modified Radical Mastectomy	Axillary lymph node dissection alone	Negative	30	24	N1	T4b	Stage IIIB	M0	YES	Not Available				TNBC	Negative	Not Available	Negative	Not Available	Negative	Not Available	Not Available	Alive	TUMOR FREE	0	4233	0	4233
TCGA-B6-A2IU-01A-32R-A18M-07	Tumor	Yes	No	FEMALE	WHITE	62	Post	Right	Core needle biopsy	Infiltrating Lobular Carcinoma	No	Modified Radical Mastectomy	Axillary lymph node dissection alone	Negative	28	0	N0	T2	Stage IIA	M0	YES	Not Available					Positive	Not Available	Positive	Not Available	Negative	Not Available	Not Available	Alive	WITH TUMOR	0	5176	1	4224	4224	1	New Primary Tumor	Other, specify
TCGA-B6-A3ZX-01A-11R-A239-07	Tumor	Yes	No	FEMALE	BLACK OR AFRICAN AMERICAN	50	Unknown	Left Upper Inner Quadrant	Core needle biopsy	Mixed Histology (please specify)	No	Lumpectomy	Axillary lymph node dissection alone	Close	7	1	N1	T3	Stage IV	M1	YES	YES	Cyclophosphamide;Doxorubicin;Paclitaxel	Unknown;Unknown;Unknown	Not Available;Not Available;Not Available	TNBC	Negative	<10%	Negative	<10%	Negative	1+	Not Available	Alive	WITH TUMOR	1	1152	1	994	994	1	Distant Metastasis	Bone
TCGA-B6-A400-01A-11R-A239-07	Tumor	Yes	No	FEMALE	BLACK OR AFRICAN AMERICAN	43	Pre	Left Upper Outer Quadrant	Tumor resection	Infiltrating Ductal Carcinoma	No	Lumpectomy	Sentinel lymph node biopsy plus axillary dissection	Negative	5	4	N2a	T2	Stage IIIA	M0	YES	YES				TNBC	Negative	<10%	Negative	<10%	Negative	1+	Not Available	Alive	TUMOR FREE	0	215	0	215
TCGA-B6-A401-01A-11R-A239-07	Tumor	Yes	No	FEMALE	BLACK OR AFRICAN AMERICAN	47	Pre	Left Upper Outer Quadrant	Core needle biopsy	Infiltrating Ductal Carcinoma	No	Lumpectomy	Sentinel lymph node biopsy plus axillary dissection	Negative	4	1	N1a	T1c	Stage IIA	M0	NO	YES	Cyclophosphamide;Doxetaxel;Doxorubicin;Femara	Unknown;Unknown;Unknown;Unknown	Not Available;Not Available;Not Available;Not Available		Positive	80-89%	Positive	90-99%	Negative	1+	Not Available	Alive	TUMOR FREE	0	2596	0	2596
TCGA-B6-A402-01A-11R-A239-07	Tumor	Yes	No	FEMALE	BLACK OR AFRICAN AMERICAN	47	Pre	Right Lower Outer Quadrant	Core needle biopsy	Infiltrating Ductal Carcinoma	No	Lumpectomy	Sentinel node biopsy alone	Negative	3	0	N0 (i-)	T1c	Stage I	M0	YES;YES	YES	Cyclophosphamide;Doxorubicin;Paclitaxel;Doxil	Partial Response;Partial Response;Partial Response;Partial Response	Not Available;Not Available;Not Available;Not Available	TNBC	Negative	<10%	Negative	<10%	Negative	1+	Not Available	Alive	WITH TUMOR	0	2281	1	1516	1516	1	Locoregional Recurrence	Other, specify
TCGA-B6-A408-01A-12R-A24H-07	Tumor	Yes	No	FEMALE	BLACK OR AFRICAN AMERICAN	55	Unknown	Left	Tumor resection	Mixed Histology (please specify)	No	Simple Mastectomy	Axillary lymph node dissection alone	Negative	23	10	N3a	T2	Stage IIIC	M0	YES	YES	Cyclophosphamide;Docetaxel;Doxorubicin	Unknown;Unknown;Unknown	Not Available;Not Available;Not Available		Positive	90-99%	Positive	60-69%	Negative	2+	1.2	Alive	TUMOR FREE	0	2072	0	2072
TCGA-B6-A409-01A-11R-A24H-07	Tumor	Yes	No	FEMALE	BLACK OR AFRICAN AMERICAN	44	Pre (<6 months since LMP AND no prior bilateral ovariectomy AND not on estrogen replacement)	Right Upper Outer Quadrant	Fine needle aspiration biopsy	Infiltrating Ductal Carcinoma	No	Simple Mastectomy	Sentinel lymph node biopsy plus axillary dissection	Negative	22	6	N2a	T1c	Stage IIIA	M0		NO	Cyclophosphamide;Doxorubicin;Paclitaxel	Unknown;Unknown;Unknown	Not Available;Not Available;Not Available	TNBC	Negative	<10%	Negative	<10%	Negative	1+	1.2	Dead	WITH TUMOR	1	573	1	456	456	1	Distant Metastasis	Lung
TCGA-B6-A40B-01A-11R-A239-07	Tumor	Yes	No	FEMALE	WHITE	76	Post (prior bilateral ovariectomy OR >12 mo since LMP with no prior hysterectomy)	Left Upper Outer Quadrant	Core needle biopsy	Infiltrating Lobular Carcinoma	No	Lumpectomy	Sentinel node biopsy alone	Negative	3	0	N0 (i-)	T1b	Stage I	M0	NO	NO					Positive	90-99%	Positive	90-99%	Negative	1+	Not Available	Alive	TUMOR FREE	0	3152	0	3152
TCGA-B6-A40C-01A-11R-A239-07	Tumor	Yes	No	FEMALE	WHITE	51	Unknown	Left Upper Outer Quadrant	Core needle biopsy	Infiltrating Lobular Carcinoma	No	Simple Mastectomy	Sentinel node biopsy alone	Negative	3	0	N0 (i-)	T3	Stage IIB	M0	YES	YES	Cyclophosphamide;Doxorubicin;Paclitaxel	Unknown;Unknown;Unknown	Not Available;Not Available;Not Available		Positive	50-59%	Positive	90-99%	Negative	1+	Not Available	Alive	TUMOR FREE	0	2164	0	2164
TCGA-BH-A0AU-01A-11R-A12P-07	Tumor	Yes	No	FEMALE	WHITE	45	Pre (<6 months since LMP AND no prior bilateral ovariectomy AND not on estrogen replacement)	Left Upper Inner Quadrant	Core needle biopsy	Infiltrating Ductal Carcinoma	No	Other	Not Available	Negative	2	0	N0	T2	Stage IIA	M0	YES	Not Available				Her-2	Positive	Not Available	Positive	Not Available	Positive	Not Available	Not Available	Alive	TUMOR FREE	0	1914	0	1914
TCGA-BH-A0AU-11A-11R-A12P-07	Normal	Yes	No	FEMALE	WHITE	45	Pre (<6 months since LMP AND no prior bilateral ovariectomy AND not on estrogen replacement)	Left Upper Inner Quadrant	Core needle biopsy	Infiltrating Ductal Carcinoma	No	Other	Not Available	Negative	2	0	N0	T2	Stage IIA	M0	YES	Not Available				Her-2	Positive	Not Available	Positive	Not Available	Positive	Not Available	Not Available	Alive	TUMOR FREE	0	1914	0	1914
TCGA-BH-A0AV-01A-31R-A115-07	Tumor	Yes	No	FEMALE	BLACK OR AFRICAN AMERICAN	52	Peri (6-12 months since last menstrual period)	Left Upper Inner Quadrant	Core needle biopsy	Infiltrating Ductal Carcinoma	No	Other	Not Available	Negative	2	0	N0	T1c	Stage I	M0	YES	Not Available	Taxotere;Cytoxan	Complete Response;Complete Response	Not Available;Not Available	TNBC	Negative	Not Available	Negative	Not Available	Negative	Not Available	Not Available	Alive	TUMOR FREE	0	1820	0	1820
TCGA-BH-A0AW-01A-11R-A056-07	Tumor	Yes	No	FEMALE	WHITE	56	Post (prior bilateral ovariectomy OR >12 mo since LMP with no prior hysterectomy)	Left Upper Inner Quadrant;Left Upper Outer Quadrant;Left	Core needle biopsy	Infiltrating Ductal Carcinoma	No	Lumpectomy	Axillary lymph node dissection alone	Negative	12	2	N1a	T1c	Stage IIA	M0	YES	Not Available	Carboplatin;Arimidex;Taxotere;Herceptin;Aromasin	Not Available;Not Available;Not Available;Not Available;Not Available	ADJUVANT;ADJUVANT;ADJUVANT;ADJUVANT;ADJUVANT	Her-2	Positive	Not Available	Negative	Not Available	Positive	3+	Not Available	Alive	TUMOR FREE	0	622	0	622
TCGA-BH-A0AY-01A-21R-A00Z-07	Tumor	Yes	No	FEMALE	WHITE	62	Post (prior bilateral ovariectomy OR >12 mo since LMP with no prior hysterectomy)	Left Lower Outer Quadrant;Left	Core needle biopsy	Infiltrating Ductal Carcinoma	No	Simple Mastectomy	Sentinel node biopsy alone	Negative	1	0	N0 (i-)	T2	Stage IIA	M0	NO	Not Available	Unknown;Aromasin	Not Available;Not Available	ADJUVANT;ADJUVANT		Positive	Not Available	Positive	Not Available	Negative	0	Not Available	Alive	TUMOR FREE	0	777	0	777
TCGA-BH-A0AY-11A-23R-A089-07	Normal	Yes	No	FEMALE	WHITE	62	Post (prior bilateral ovariectomy OR >12 mo since LMP with no prior hysterectomy)	Left Lower Outer Quadrant;Left	Core needle biopsy	Infiltrating Ductal Carcinoma	No	Simple Mastectomy	Sentinel node biopsy alone	Negative	1	0	N0 (i-)	T2	Stage IIA	M0	NO	Not Available	Unknown;Aromasin	Not Available;Not Available	ADJUVANT;ADJUVANT		Positive	Not Available	Positive	Not Available	Negative	0	Not Available	Alive	TUMOR FREE	0	777	0	777
TCGA-BH-A0AZ-01A-21R-A12P-07	Tumor	Yes	No	FEMALE	WHITE	47	Pre (<6 months since LMP AND no prior bilateral ovariectomy AND not on estrogen replacement)	Right	Core needle biopsy	Infiltrating Ductal Carcinoma	No	Other	Not Available	Negative	13	1	N1a	T3	Stage IIIA	cM0 (i+)	NO	Not Available	Doxorubicin;Cytoxan;Taxol;Avastin	Complete Response;Complete Response;Complete Response;Complete Response	Not Available;Not Available;Not Available;Not Available		Positive	Not Available	Positive	Not Available	Negative	Not Available	Not Available	Alive	TUMOR FREE	0	1919	0	1919
TCGA-BH-A0AZ-11A-22R-A12P-07	Normal	Yes	No	FEMALE	WHITE	47	Pre (<6 months since LMP AND no prior bilateral ovariectomy AND not on estrogen replacement)	Right	Core needle biopsy	Infiltrating Ductal Carcinoma	No	Other	Not Available	Negative	13	1	N1a	T3	Stage IIIA	cM0 (i+)	NO	Not Available	Doxorubicin;Cytoxan;Taxol;Avastin	Complete Response;Complete Response;Complete Response;Complete Response	Not Available;Not Available;Not Available;Not Available		Positive	Not Available	Positive	Not Available	Negative	Not Available	Not Available	Alive	TUMOR FREE	0	1919	0	1919
TCGA-BH-A0B0-01A-21R-A115-07	Tumor	Yes	No	FEMALE	BLACK OR AFRICAN AMERICAN	56	Peri (6-12 months since last menstrual period)	Left Upper Outer Quadrant	Fine needle aspiration biopsy	Infiltrating Ductal Carcinoma	No	Other	Not Available	Negative	2	0	N0	T1c	Stage I	M0	YES	Not Available	Adriamycin;Cytoxan	Complete Response;Complete Response	Not Available;Not Available		Positive	Not Available	Positive	Not Available	Negative	Not Available	Not Available	Alive	TUMOR FREE	0	2477	0	2477
TCGA-BH-A0B1-01A-12R-A056-07	Tumor	Yes	No	FEMALE	WHITE	66	Post (prior bilateral ovariectomy OR >12 mo since LMP with no prior hysterectomy)	Right Upper Outer Quadrant;Right	Core needle biopsy	Infiltrating Ductal Carcinoma	No	Modified Radical Mastectomy	Sentinel lymph node biopsy plus axillary dissection	Negative	15	1	N1a	T2	Stage IIB	M0	YES	Not Available	Adriamycin;Paclitaxel;Cytoxan;Arimidex	Not Available;Not Available;Not Available;Not Available	ADJUVANT;ADJUVANT;ADJUVANT;ADJUVANT		Positive	90-99%	Positive	40-49%	Negative	1+	Not Available	Alive	TUMOR FREE	0	1148	0	1148
TCGA-BH-A0B2-01A-11R-A10J-07	Tumor	No	No
TCGA-BH-A0B3-01A-11R-A056-07	Tumor	Yes	No	FEMALE	WHITE	53	Post (prior bilateral ovariectomy OR >12 mo since LMP with no prior hysterectomy)	Right Upper Inner Quadrant;Right Upper Outer Quadrant;Right	Core needle biopsy	Infiltrating Ductal Carcinoma	No	Other	Sentinel lymph node biopsy plus axillary dissection	Negative	29	2	N1a	T2	Stage IIB	M0	YES	Not Available	CYCLOPHOSPHAMIDE;Doxorubicin;Paclitaxel	Not Available;Not Available;Not Available	ADJUVANT;ADJUVANT;ADJUVANT	TNBC	Negative	Not Available	Negative	Not Available	Negative	1+	Not Available	Alive	TUMOR FREE	0	1203	0	1203
TCGA-BH-A0B3-11B-21R-A089-07	Normal	Yes	No	FEMALE	WHITE	53	Post (prior bilateral ovariectomy OR >12 mo since LMP with no prior hysterectomy)	Right Upper Inner Quadrant;Right Upper Outer Quadrant;Right	Core needle biopsy	Infiltrating Ductal Carcinoma	No	Other	Sentinel lymph node biopsy plus axillary dissection	Negative	29	2	N1a	T2	Stage IIB	M0	YES	Not Available	CYCLOPHOSPHAMIDE;Doxorubicin;Paclitaxel	Not Available;Not Available;Not Available	ADJUVANT;ADJUVANT;ADJUVANT	TNBC	Negative	Not Available	Negative	Not Available	Negative	1+	Not Available	Alive	TUMOR FREE	0	1203	0	1203
TCGA-BH-A0B4-01A-11R-A00Z-07	Tumor	No	No	MALE	WHITE	65	Post	Left	Core needle biopsy	Infiltrating Ductal Carcinoma	No	Modified Radical Mastectomy	Axillary lymph node dissection alone	Negative	10	6	N2	T2	Stage IIIA	M0	YES	Not Available	Docetaxel;Tamoxifen	Not Available;Not Available	ADJUVANT;ADJUVANT	Her-2	Positive	80-89%	Positive	50-59%	Positive	2+	2.83	Alive	TUMOR FREE	0	1191	0	1191
TCGA-BH-A0B5-01A-11R-A12P-07	Tumor	Yes	No	FEMALE	WHITE	40	Pre (<6 months since LMP AND no prior bilateral ovariectomy AND not on estrogen replacement)	Left	Fine needle aspiration biopsy	Infiltrating Lobular Carcinoma	No	Modified Radical Mastectomy	Not Available	Positive	24	5	N2a	T2	Stage IIIA	M0	YES	Not Available	Adriamycin;Cytoxan;Taxol	Complete Response;Complete Response;Complete Response	Not Available;Not Available;Not Available		Positive	Not Available	Positive	Not Available	Negative	Not Available	Not Available	Alive	TUMOR FREE	0	2136	0	2136
TCGA-BH-A0B5-11A-23R-A12P-07	Normal	Yes	No	FEMALE	WHITE	40	Pre (<6 months since LMP AND no prior bilateral ovariectomy AND not on estrogen replacement)	Left	Fine needle aspiration biopsy	Infiltrating Lobular Carcinoma	No	Modified Radical Mastectomy	Not Available	Positive	24	5	N2a	T2	Stage IIIA	M0	YES	Not Available	Adriamycin;Cytoxan;Taxol	Complete Response;Complete Response;Complete Response	Not Available;Not Available;Not Available		Positive	Not Available	Positive	Not Available	Negative	Not Available	Not Available	Alive	TUMOR FREE	0	2136	0	2136
TCGA-BH-A0B6-01A-11R-A19W-07	Tumor	No	No	FEMALE	WHITE	47	Pre	Left Upper Outer Quadrant	Fine needle aspiration biopsy	Infiltrating Ductal Carcinoma	Yes	Other	Not Available	Negative	4	0	N0	T1c	Stage I	M0	YES	Not Available				Her-2	Positive	Not Available	Positive	Not Available	Positive	Not Available	Not Available	Alive	TUMOR FREE	0	2483	0	2483
TCGA-BH-A0B7-01A-12R-A115-07	Tumor	Yes	No	FEMALE	WHITE	42	Pre (<6 months since LMP AND no prior bilateral ovariectomy AND not on estrogen replacement)	Right	Core needle biopsy	Infiltrating Ductal Carcinoma	No	Other	Not Available	Negative	17	1	N1a	T2	Stage IIB	M0	YES	Not Available	Adriamycin;Taxol	Complete Response;Complete Response	Not Available;Not Available	Her-2	Positive	Not Available	Positive	Not Available	Positive	3+	Not Available	Alive	TUMOR FREE	0	2559	0	2559
TCGA-BH-A0B7-11A-34R-A115-07	Normal	Yes	No	FEMALE	WHITE	42	Pre (<6 months since LMP AND no prior bilateral ovariectomy AND not on estrogen replacement)	Right	Core needle biopsy	Infiltrating Ductal Carcinoma	No	Other	Not Available	Negative	17	1	N1a	T2	Stage IIB	M0	YES	Not Available	Adriamycin;Taxol	Complete Response;Complete Response	Not Available;Not Available	Her-2	Positive	Not Available	Positive	Not Available	Positive	3+	Not Available	Alive	TUMOR FREE	0	2559	0	2559
TCGA-BH-A0B8-01A-21R-A056-07	Tumor	Yes	No	FEMALE	WHITE	64	Post (prior bilateral ovariectomy OR >12 mo since LMP with no prior hysterectomy)	Right Upper Inner Quadrant;Right	Core needle biopsy	Infiltrating Ductal Carcinoma	No	Lumpectomy	Sentinel node biopsy alone	Negative	2	0	N0 (i-)	T1b	Stage I	M0	YES	Not Available	Arimidex	Not Available	ADJUVANT		Positive	90-99%	Positive	30-39%	Negative	2+	1.29	Alive	TUMOR FREE	0	1569	0	1569
TCGA-BH-A0B8-11A-41R-A089-07	Normal	Yes	No	FEMALE	WHITE	64	Post (prior bilateral ovariectomy OR >12 mo since LMP with no prior hysterectomy)	Right Upper Inner Quadrant;Right	Core needle biopsy	Infiltrating Ductal Carcinoma	No	Lumpectomy	Sentinel node biopsy alone	Negative	2	0	N0 (i-)	T1b	Stage I	M0	YES	Not Available	Arimidex	Not Available	ADJUVANT		Positive	90-99%	Positive	30-39%	Negative	2+	1.29	Alive	TUMOR FREE	0	1569	0	1569
TCGA-BH-A0B9-01A-11R-A056-07	Tumor	Yes	No	FEMALE	WHITE	44	Pre (<6 months since LMP AND no prior bilateral ovariectomy AND not on estrogen replacement)	Right Lower Inner Quadrant;Right Lower Outer Quadrant;Right	Core needle biopsy	Infiltrating Ductal Carcinoma	No	Other	Sentinel node biopsy alone	Negative	1	0	N0 (i-)	T1c	Stage IA	M0	YES	Not Available	CYCLOPHOSPHAMIDE;Doxorubicin	Not Available;Not Available	ADJUVANT;ADJUVANT	TNBC	Negative	Not Available	Negative	Not Available	Negative	0	Not Available	Alive	TUMOR FREE	0	1572	0	1572
TCGA-BH-A0BA-01A-11R-A056-07	Tumor	Yes	No	FEMALE	WHITE	51	Pre (<6 months since LMP AND no prior bilateral ovariectomy AND not on estrogen replacement)	Left Upper Inner Quadrant;Left Upper Outer Quadrant;Left Lower Inner Quadrant;Left Lower Outer Quadrant;Left	Core needle biopsy	Mixed Histology (please specify)	No	Modified Radical Mastectomy	Sentinel lymph node biopsy plus axillary dissection	Negative	27	27	N3a	T3	Stage IIIC	M0	YES	Not Available	Cytoxan;Paclitaxel;Adriamycin	Not Available;Not Available;Not Available	ADJUVANT;ADJUVANT;ADJUVANT		Positive	80-89%	Positive	40-49%	Negative	1+	Not Available	Alive	TUMOR FREE	0	1132	0	1132
TCGA-BH-A0BA-11A-22R-A19E-07	Normal	Yes	No	FEMALE	WHITE	51	Pre (<6 months since LMP AND no prior bilateral ovariectomy AND not on estrogen replacement)	Left Upper Inner Quadrant;Left Upper Outer Quadrant;Left Lower Inner Quadrant;Left Lower Outer Quadrant;Left	Core needle biopsy	Mixed Histology (please specify)	No	Modified Radical Mastectomy	Sentinel lymph node biopsy plus axillary dissection	Negative	27	27	N3a	T3	Stage IIIC	M0	YES	Not Available	Cytoxan;Paclitaxel;Adriamycin	Not Available;Not Available;Not Available	ADJUVANT;ADJUVANT;ADJUVANT		Positive	80-89%	Positive	40-49%	Negative	1+	Not Available	Alive	TUMOR FREE	0	1132	0	1132
TCGA-BH-A0BC-01A-22R-A084-07	Tumor	Yes	No	FEMALE	WHITE	60	Post (prior bilateral ovariectomy OR >12 mo since LMP with no prior hysterectomy)	Right Upper Inner Quadrant;Right Upper Outer Quadrant;Right	Core needle biopsy	Infiltrating Ductal Carcinoma	No	Other	Sentinel lymph node biopsy plus axillary dissection	Negative	18	12	N3	T2	Stage IIIC	M0	YES	Not Available	Doxorubicin;Docetaxel;CYCLOPHOSPHAMIDE;Arimidex;Paclitaxel	Not Available;Not Available;Not Available;Not Available;Not Available	ADJUVANT;ADJUVANT;ADJUVANT;ADJUVANT;ADJUVANT		Positive	90-99%	Positive	30-39%	Negative	0	Not Available	Alive	TUMOR FREE	0	974	0	974
TCGA-BH-A0BC-11A-22R-A089-07	Normal	Yes	No	FEMALE	WHITE	60	Post (prior bilateral ovariectomy OR >12 mo since LMP with no prior hysterectomy)	Right Upper Inner Quadrant;Right Upper Outer Quadrant;Right	Core needle biopsy	Infiltrating Ductal Carcinoma	No	Other	Sentinel lymph node biopsy plus axillary dissection	Negative	18	12	N3	T2	Stage IIIC	M0	YES	Not Available	Doxorubicin;Docetaxel;CYCLOPHOSPHAMIDE;Arimidex;Paclitaxel	Not Available;Not Available;Not Available;Not Available;Not Available	ADJUVANT;ADJUVANT;ADJUVANT;ADJUVANT;ADJUVANT		Positive	90-99%	Positive	30-39%	Negative	0	Not Available	Alive	TUMOR FREE	0	974	0	974
TCGA-BH-A0BD-01A-11R-A034-07	Tumor	Yes	No	FEMALE	WHITE	47	Pre (<6 months since LMP AND no prior bilateral ovariectomy AND not on estrogen replacement)	Left Upper Inner Quadrant;Left Upper Outer Quadrant;Left	Core needle biopsy	Infiltrating Ductal Carcinoma	No	Other	Sentinel lymph node biopsy plus axillary dissection	Negative	9	2	N1a	T1c	Stage IIA	M0	YES	Not Available	Doxorubicin;Tamoxifen;CYCLOPHOSPHAMIDE	Not Available;Not Available;Not Available	ADJUVANT;ADJUVANT;ADJUVANT		Positive	Not Available	Positive	Not Available	Negative	1+	Not Available	Alive	TUMOR FREE	0	554	0	554
TCGA-BH-A0BF-01A-21R-A12P-07	Tumor	Yes	No	FEMALE	WHITE	56	Post (prior bilateral ovariectomy OR >12 mo since LMP with no prior hysterectomy)	Right Upper Outer Quadrant	Core needle biopsy	Infiltrating Ductal Carcinoma	No	Other	Not Available	Negative	3	1	N1mi	T2	Stage IIB	M0	NO	Not Available					Positive	Not Available	Positive	Not Available	Negative	Not Available	Not Available	Alive	TUMOR FREE	1	1324	0	1324
TCGA-BH-A0BG-01A-11R-A115-07	Tumor	Yes	No	FEMALE	WHITE	73	Post (prior bilateral ovariectomy OR >12 mo since LMP with no prior hysterectomy)	Left Lower Outer Quadrant	Core needle biopsy	Infiltrating Ductal Carcinoma	No	Other	Not Available	Negative	1	0	N0	T1	Stage I	M0	YES	Not Available				TNBC	Negative	Not Available	Negative	Not Available	Negative	Not Available	Not Available	Alive	TUMOR FREE	0	1871	0	1871
TCGA-BH-A0BJ-01A-11R-A056-07	Tumor	Yes	No	FEMALE	WHITE	41	Pre (<6 months since LMP AND no prior bilateral ovariectomy AND not on estrogen replacement)	Left Upper Outer Quadrant;Left	Core needle biopsy	Infiltrating Ductal Carcinoma	No	Other	Sentinel lymph node biopsy plus axillary dissection	Negative	18	2	N1a	T2	Stage IIB	M0	YES	Not Available	DOXORUBICIN;PACLITAXEL;CYCLOPHOSPHAMIDE;ARIMIDEX	Not Available;Not Available;Not Available;Not Available	ADJUVANT;ADJUVANT;ADJUVANT;ADJUVANT		Positive	90-99%	Positive	70-79%	Negative	1+	Not Available	Alive	TUMOR FREE	0	660	0	660
TCGA-BH-A0BJ-11A-23R-A089-07	Normal	Yes	No	FEMALE	WHITE	41	Pre (<6 months since LMP AND no prior bilateral ovariectomy AND not on estrogen replacement)	Left Upper Outer Quadrant;Left	Core needle biopsy	Infiltrating Ductal Carcinoma	No	Other	Sentinel lymph node biopsy plus axillary dissection	Negative	18	2	N1a	T2	Stage IIB	M0	YES	Not Available	DOXORUBICIN;PACLITAXEL;CYCLOPHOSPHAMIDE;ARIMIDEX	Not Available;Not Available;Not Available;Not Available	ADJUVANT;ADJUVANT;ADJUVANT;ADJUVANT		Positive	90-99%	Positive	70-79%	Negative	1+	Not Available	Alive	TUMOR FREE	0	660	0	660
TCGA-BH-A0BL-01A-11R-A115-07	Tumor	Yes	No	FEMALE	WHITE	35	Pre (<6 months since LMP AND no prior bilateral ovariectomy AND not on estrogen replacement)	Right Upper Outer Quadrant	Core needle biopsy	Infiltrating Ductal Carcinoma	No	Other	Not Available	Negative	2	0	N0	T1c	Stage I	M0	NO	Not Available	Adriamycin;Cytoxan;Taxol	Complete Response;Complete Response;Complete Response	Not Available;Not Available;Not Available	TNBC	Negative	Not Available	Negative	Not Available	Negative	Not Available	Not Available	Alive	TUMOR FREE	0	2278	0	2278
TCGA-BH-A0BM-01A-11R-A056-07	Tumor	Yes	No	FEMALE	WHITE	54	Post (prior bilateral ovariectomy OR >12 mo since LMP with no prior hysterectomy)	Right Upper Inner Quadrant;Right Upper Outer Quadrant;Right	Core needle biopsy	Infiltrating Ductal Carcinoma	No	Lumpectomy	Sentinel lymph node biopsy plus axillary dissection	Negative	24	3	N1a	T2	Stage IIB	M0	NO	Not Available	TAXOTERE;ADRIAMYCIN;CYTOXAN	Not Available;Not Available;Not Available	ADJUVANT;ADJUVANT;ADJUVANT		Positive	Not Available	Negative	Not Available	Negative	0	Not Available	Alive	TUMOR FREE	0	1876	0	1876
TCGA-BH-A0BM-11A-12R-A089-07	Normal	Yes	No	FEMALE	WHITE	54	Post (prior bilateral ovariectomy OR >12 mo since LMP with no prior hysterectomy)	Right Upper Inner Quadrant;Right Upper Outer Quadrant;Right	Core needle biopsy	Infiltrating Ductal Carcinoma	No	Lumpectomy	Sentinel lymph node biopsy plus axillary dissection	Negative	24	3	N1a	T2	Stage IIB	M0	NO	Not Available	TAXOTERE;ADRIAMYCIN;CYTOXAN	Not Available;Not Available;Not Available	ADJUVANT;ADJUVANT;ADJUVANT		Positive	Not Available	Negative	Not Available	Negative	0	Not Available	Alive	TUMOR FREE	0	1876	0	1876
TCGA-BH-A0BO-01A-23R-A12D-07	Tumor	Yes	No	FEMALE	WHITE	54	Pre (<6 months since LMP AND no prior bilateral ovariectomy AND not on estrogen replacement)	Left Upper Inner Quadrant	Core needle biopsy	Infiltrating Ductal Carcinoma	No	Other	Not Available	Negative	3	0	N0	T1b	Stage I	M0	YES	Not Available					Positive	Not Available	Positive	Not Available	Negative	Not Available	Not Available	Alive	TUMOR FREE	0	2197	0	2197
TCGA-BH-A0BP-01A-11R-A115-07	Tumor	Yes	No	FEMALE	WHITE	76	Post (prior bilateral ovariectomy OR >12 mo since LMP with no prior hysterectomy)	Left Upper Outer Quadrant	Core needle biopsy	Infiltrating Ductal Carcinoma	No	Other	Not Available	Negative	3	0	N0	T1c	Stage I	M0	YES	Not Available					Positive	Not Available	Positive	Not Available	Negative	Not Available	Not Available	Alive	TUMOR FREE	1	2296	0	2296
TCGA-BH-A0BQ-01A-21R-A115-07	Tumor	Yes	No	FEMALE	WHITE	39	Pre (<6 months since LMP AND no prior bilateral ovariectomy AND not on estrogen replacement)	Left	Core needle biopsy	Infiltrating Ductal Carcinoma	No	Other	Not Available	Negative	2	0	N0	T1c	Stage I	M0	NO	Not Available				Her-2	Positive	Not Available	Positive	Not Available	Positive	Not Available	Not Available	Alive	TUMOR FREE	0	2255	1	1709	1709	1	Locoregional Recurrence	Other, specify
TCGA-BH-A0BQ-11A-33R-A115-07	Normal	Yes	No	FEMALE	WHITE	39	Pre (<6 months since LMP AND no prior bilateral ovariectomy AND not on estrogen replacement)	Left	Core needle biopsy	Infiltrating Ductal Carcinoma	No	Other	Not Available	Negative	2	0	N0	T1c	Stage I	M0	NO	Not Available				Her-2	Positive	Not Available	Positive	Not Available	Positive	Not Available	Not Available	Alive	TUMOR FREE	0	2255	1	1709	1709	1	Locoregional Recurrence	Other, specify
TCGA-BH-A0BR-01A-21R-A115-07	Tumor	Yes	No	FEMALE	WHITE	59	Post (prior bilateral ovariectomy OR >12 mo since LMP with no prior hysterectomy)	Left Lower Inner Quadrant	Core needle biopsy	Infiltrating Ductal Carcinoma	No	Other	Not Available	Negative	3	0	N0	T1c	Stage I	M0	YES	Not Available					Positive	Not Available	Positive	Not Available	Negative	Not Available	Not Available	Alive	TUMOR FREE	0	2330	0	2330
TCGA-BH-A0BS-11A-11R-A12P-07	Normal	Yes	No	FEMALE	WHITE	55	Post (prior bilateral ovariectomy OR >12 mo since LMP with no prior hysterectomy)	Left	Core needle biopsy	Infiltrating Ductal Carcinoma	No	Simple Mastectomy	Not Available	Negative	11	0	N1c	T3	Stage IIIA	M0	YES	Not Available	Adriamycin;Cytoxan	Complete Response;Complete Response	Not Available;Not Available		Positive	Not Available	Positive	Not Available	Negative	Not Available	Not Available	Alive	TUMOR FREE	0	2612	0	2612
TCGA-BH-A0BT-01A-11R-A12P-07	Tumor	Yes	No	FEMALE	WHITE	56	Peri (6-12 months since last menstrual period)	Right Upper Inner Quadrant	Core needle biopsy	Infiltrating Ductal Carcinoma	No	Other	Not Available	Negative	Not Available	Not Available	N1mi	T1c	Stage IIA	M0	YES	Not Available	Adriamycin;Cytoxan	Complete Response;Complete Response	Not Available;Not Available		Positive	Not Available	Positive	Not Available	Negative	Not Available	Not Available	Alive	TUMOR FREE	0	2365	0	2365
TCGA-BH-A0BT-11A-21R-A12P-07	Normal	Yes	No	FEMALE	WHITE	56	Peri (6-12 months since last menstrual period)	Right Upper Inner Quadrant	Core needle biopsy	Infiltrating Ductal Carcinoma	No	Other	Not Available	Negative	Not Available	Not Available	N1mi	T1c	Stage IIA	M0	YES	Not Available	Adriamycin;Cytoxan	Complete Response;Complete Response	Not Available;Not Available		Positive	Not Available	Positive	Not Available	Negative	Not Available	Not Available	Alive	TUMOR FREE	0	2365	0	2365
TCGA-BH-A0BV-01A-11R-A00Z-07	Tumor	Yes	No	FEMALE	WHITE	78	Post (prior bilateral ovariectomy OR >12 mo since LMP with no prior hysterectomy)	Right Upper Inner Quadrant;Right	Core needle biopsy	Infiltrating Ductal Carcinoma	No	Modified Radical Mastectomy	Sentinel lymph node biopsy plus axillary dissection	Negative	25	2	N1a	T2	Stage IIB	M0	NO	Not Available	DOXORUBICIN;ARIMIDEX;CYCLOPHOSPHAMIDE;PACLITAXEL	Not Available;Not Available;Not Available;Not Available	ADJUVANT;ADJUVANT;ADJUVANT;ADJUVANT		Positive	90-99%	Positive	50-59%	Negative	0	Not Available	Alive	TUMOR FREE	0	1519	0	1519
TCGA-BH-A0BV-11A-31R-A089-07	Normal	Yes	No	FEMALE	WHITE	78	Post (prior bilateral ovariectomy OR >12 mo since LMP with no prior hysterectomy)	Right Upper Inner Quadrant;Right	Core needle biopsy	Infiltrating Ductal Carcinoma	No	Modified Radical Mastectomy	Sentinel lymph node biopsy plus axillary dissection	Negative	25	2	N1a	T2	Stage IIB	M0	NO	Not Available	DOXORUBICIN;ARIMIDEX;CYCLOPHOSPHAMIDE;PACLITAXEL	Not Available;Not Available;Not Available;Not Available	ADJUVANT;ADJUVANT;ADJUVANT;ADJUVANT		Positive	90-99%	Positive	50-59%	Negative	0	Not Available	Alive	TUMOR FREE	0	1519	0	1519
TCGA-BH-A0BW-01A-11R-A115-07	Tumor	Yes	No	FEMALE	BLACK OR AFRICAN AMERICAN	71	Post (prior bilateral ovariectomy OR >12 mo since LMP with no prior hysterectomy)	Left Lower Outer Quadrant	Core needle biopsy	Infiltrating Ductal Carcinoma	No	Other	Not Available	Negative	8	0	N0	T1c	Stage I	M0	YES	Not Available	Adriamycin;Cytoxan	Complete Response;Complete Response	Not Available;Not Available	TNBC	Negative	Not Available	Negative	Not Available	Negative	Not Available	Not Available	Alive	TUMOR FREE	0	2371	0	2371
TCGA-BH-A0BW-11A-12R-A115-07	Normal	Yes	No	FEMALE	BLACK OR AFRICAN AMERICAN	71	Post (prior bilateral ovariectomy OR >12 mo since LMP with no prior hysterectomy)	Left Lower Outer Quadrant	Core needle biopsy	Infiltrating Ductal Carcinoma	No	Other	Not Available	Negative	8	0	N0	T1c	Stage I	M0	YES	Not Available	Adriamycin;Cytoxan	Complete Response;Complete Response	Not Available;Not Available	TNBC	Negative	Not Available	Negative	Not Available	Negative	Not Available	Not Available	Alive	TUMOR FREE	0	2371	0	2371
TCGA-BH-A0BZ-01A-31R-A12P-07	Tumor	Yes	No	FEMALE	WHITE	59	Post (prior bilateral ovariectomy OR >12 mo since LMP with no prior hysterectomy)	Left	Fine needle aspiration biopsy	Infiltrating Ductal Carcinoma	No	Modified Radical Mastectomy	Not Available	Negative	23	1	N1a	T3	Stage IIIA	M0	YES	Not Available	Doxorubicin;Cyclophosphamide;Abraxane	Complete Response;Complete Response;Complete Response	Not Available;Not Available;Not Available		Positive	Not Available	Positive	Not Available	Negative	Not Available	Not Available	Alive	TUMOR FREE	0	2255	0	2255
TCGA-BH-A0BZ-11A-61R-A12P-07	Normal	Yes	No	FEMALE	WHITE	59	Post (prior bilateral ovariectomy OR >12 mo since LMP with no prior hysterectomy)	Left	Fine needle aspiration biopsy	Infiltrating Ductal Carcinoma	No	Modified Radical Mastectomy	Not Available	Negative	23	1	N1a	T3	Stage IIIA	M0	YES	Not Available	Doxorubicin;Cyclophosphamide;Abraxane	Complete Response;Complete Response;Complete Response	Not Available;Not Available;Not Available		Positive	Not Available	Positive	Not Available	Negative	Not Available	Not Available	Alive	TUMOR FREE	0	2255	0	2255
TCGA-BH-A0C0-01A-21R-A056-07	Tumor	Yes	No	FEMALE	WHITE	62	Post (prior bilateral ovariectomy OR >12 mo since LMP with no prior hysterectomy)	Left Upper Outer Quadrant;Left	Core needle biopsy	Infiltrating Ductal Carcinoma	No	Other	Axillary lymph node dissection alone	Negative	35	1	N1a	T1c	Stage IIA	M0	YES	Not Available	ARIMIDEX;CARBOPLATIN;DOCETAXEL	Not Available;Not Available;Not Available	ADJUVANT;ADJUVANT;ADJUVANT	Her-2	Positive	90-99%	Positive	60-69%	Positive	2+	4.7	Alive	TUMOR FREE	0	1270	0	1270
TCGA-BH-A0C0-11A-21R-A089-07	Normal	Yes	No	FEMALE	WHITE	62	Post (prior bilateral ovariectomy OR >12 mo since LMP with no prior hysterectomy)	Left Upper Outer Quadrant;Left	Core needle biopsy	Infiltrating Ductal Carcinoma	No	Other	Axillary lymph node dissection alone	Negative	35	1	N1a	T1c	Stage IIA	M0	YES	Not Available	ARIMIDEX;CARBOPLATIN;DOCETAXEL	Not Available;Not Available;Not Available	ADJUVANT;ADJUVANT;ADJUVANT	Her-2	Positive	90-99%	Positive	60-69%	Positive	2+	4.7	Alive	TUMOR FREE	0	1270	0	1270
TCGA-BH-A0C1-01B-11R-A12D-07	Tumor	Yes	No	FEMALE	WHITE	61	Post (prior bilateral ovariectomy OR >12 mo since LMP with no prior hysterectomy)	Right	Core needle biopsy	Infiltrating Lobular Carcinoma	No	Modified Radical Mastectomy	Not Available	Negative	10	8	N2a	T3	Stage IIIA	M0	YES	Not Available	Adriamycin;Cytoxan	Clinical Progressive Disease;Clinical Progressive Disease	Not Available;Not Available		Positive	Not Available	Positive	Not Available	Negative	Not Available	Not Available	Alive	WITH TUMOR	1	1411	1	1123	1123	1	Distant Metastasis	Bone
TCGA-BH-A0C3-01A-21R-A12P-07	Tumor	Yes	No	FEMALE	WHITE	47	Pre (<6 months since LMP AND no prior bilateral ovariectomy AND not on estrogen replacement)	Left	Core needle biopsy	Mixed Histology (please specify)	No	Other	Not Available	Negative	4	0	N0	T1c	Stage I	M0	YES	Not Available	Adriamycin;Cytoxan	Clinical Progressive Disease;Clinical Progressive Disease	Not Available;Not Available		Positive	Not Available	Negative	Not Available	Negative	Not Available	Not Available	Alive	WITH TUMOR	0	2709	1	2674	2674	1	Distant Metastasis	Bone
TCGA-BH-A0C3-11A-23R-A12P-07	Normal	Yes	No	FEMALE	WHITE	47	Pre (<6 months since LMP AND no prior bilateral ovariectomy AND not on estrogen replacement)	Left	Core needle biopsy	Mixed Histology (please specify)	No	Other	Not Available	Negative	4	0	N0	T1c	Stage I	M0	YES	Not Available	Adriamycin;Cytoxan	Clinical Progressive Disease;Clinical Progressive Disease	Not Available;Not Available		Positive	Not Available	Negative	Not Available	Negative	Not Available	Not Available	Alive	WITH TUMOR	0	2709	1	2674	2674	1	Distant Metastasis	Bone
TCGA-BH-A0C7-01B-11R-A115-07	Tumor	Yes	No	FEMALE	WHITE	48	Pre	Left	Core needle biopsy	Infiltrating Ductal Carcinoma	No	Simple Mastectomy	Not Available	Negative	18	1	N1mi	T2	Stage IIB	M0	NO	Not Available	Adriamycin;Cytoxan;Taxol	Complete Response;Complete Response;Complete Response	Not Available;Not Available;Not Available		Positive	Not Available	Negative	Not Available	Negative	Not Available	Not Available	Alive	TUMOR FREE	0	2767	0	2767
TCGA-BH-A0DD-01A-31R-A12P-07	Tumor	No	No	MALE	WHITE	58	Peri (6-12 months since last menstrual period)	Right	Core needle biopsy	Infiltrating Ductal Carcinoma	No	Modified Radical Mastectomy	Not Available	Negative	22	0	N1a	T2	Stage IIB	M0	NO	Not Available	Docetaxel;Carboplatin	Complete Response;Complete Response	Not Available;Not Available	Her-2	Positive	Not Available	Positive	Not Available	Positive	Not Available	Not Available	Alive	TUMOR FREE	0	2486	0	2486
TCGA-BH-A0DD-11A-23R-A12P-07	Normal	No	No	MALE	WHITE	58	Peri (6-12 months since last menstrual period)	Right	Core needle biopsy	Infiltrating Ductal Carcinoma	No	Modified Radical Mastectomy	Not Available	Negative	22	0	N1a	T2	Stage IIB	M0	NO	Not Available	Docetaxel;Carboplatin	Complete Response;Complete Response	Not Available;Not Available	Her-2	Positive	Not Available	Positive	Not Available	Positive	Not Available	Not Available	Alive	TUMOR FREE	0	2486	0	2486
TCGA-BH-A0DE-01A-11R-A115-07	Tumor	Yes	No	FEMALE	WHITE	62	Post (prior bilateral ovariectomy OR >12 mo since LMP with no prior hysterectomy)	Left Upper Outer Quadrant	Core needle biopsy	Infiltrating Ductal Carcinoma	No	Other	Not Available	Negative	2	0	N0	T2	Stage IIA	M0	YES	Not Available					Positive	Not Available	Positive	Not Available	Negative	Not Available	Not Available	Alive	TUMOR FREE	0	2372	0	2372
TCGA-BH-A0DG-01A-21R-A12P-07	Tumor	Yes	No	FEMALE	BLACK OR AFRICAN AMERICAN	30	Pre (<6 months since LMP AND no prior bilateral ovariectomy AND not on estrogen replacement)	Right Upper Outer Quadrant	Core needle biopsy	Infiltrating Ductal Carcinoma	No	Other	Not Available	Negative	3	0	N0	T2	Stage IIA	M0	YES	Not Available	Taxotere;Adriamycin;Cytoxan	Complete Response;Complete Response;Complete Response	Not Available;Not Available;Not Available		Positive	Not Available	Negative	Not Available	Negative	Not Available	Not Available	Alive	TUMOR FREE	0	2041	0	2041
TCGA-BH-A0DG-11A-43R-A12P-07	Normal	Yes	No	FEMALE	BLACK OR AFRICAN AMERICAN	30	Pre (<6 months since LMP AND no prior bilateral ovariectomy AND not on estrogen replacement)	Right Upper Outer Quadrant	Core needle biopsy	Infiltrating Ductal Carcinoma	No	Other	Not Available	Negative	3	0	N0	T2	Stage IIA	M0	YES	Not Available	Taxotere;Adriamycin;Cytoxan	Complete Response;Complete Response;Complete Response	Not Available;Not Available;Not Available		Positive	Not Available	Negative	Not Available	Negative	Not Available	Not Available	Alive	TUMOR FREE	0	2041	0	2041
TCGA-BH-A0DH-01A-11R-A084-07	Tumor	Yes	No	FEMALE	WHITE	63	Post (prior bilateral ovariectomy OR >12 mo since LMP with no prior hysterectomy)	Left Upper Outer Quadrant;Left	Core needle biopsy	Infiltrating Ductal Carcinoma	No	Other	Axillary lymph node dissection alone	Positive	28	3	N1a	T2	Stage IIB	M0	YES	Not Available	CYCLOPHOSPHAMIDE;FEMARA;TAXOTERE;DOXORUBICIN	Not Available;Not Available;Not Available;Not Available	ADJUVANT;ADJUVANT;ADJUVANT;ADJUVANT		Positive	90-99%	Positive	40-49%	Negative	0	Not Available	Alive	TUMOR FREE	0	1156	0	1156
TCGA-BH-A0DH-11A-31R-A089-07	Normal	Yes	No	FEMALE	WHITE	63	Post (prior bilateral ovariectomy OR >12 mo since LMP with no prior hysterectomy)	Left Upper Outer Quadrant;Left	Core needle biopsy	Infiltrating Ductal Carcinoma	No	Other	Axillary lymph node dissection alone	Positive	28	3	N1a	T2	Stage IIB	M0	YES	Not Available	CYCLOPHOSPHAMIDE;FEMARA;TAXOTERE;DOXORUBICIN	Not Available;Not Available;Not Available;Not Available	ADJUVANT;ADJUVANT;ADJUVANT;ADJUVANT		Positive	90-99%	Positive	40-49%	Negative	0	Not Available	Alive	TUMOR FREE	0	1156	0	1156
TCGA-BH-A0DI-01A-21R-A12P-07	Tumor	Yes	No	FEMALE	WHITE	63	Post (prior bilateral ovariectomy OR >12 mo since LMP with no prior hysterectomy)	Right	Core needle biopsy	Infiltrating Ductal Carcinoma	No	Modified Radical Mastectomy	Not Available	Negative	28	3	N1a	T2	Stage IIB	M0	YES	Not Available	Adriamycin;Cytoxan;Taxol	Complete Response;Complete Response;Complete Response	Not Available;Not Available;Not Available		Positive	Not Available	Positive	Not Available	Negative	Not Available	Not Available	Alive	TUMOR FREE	0	912	0	912
TCGA-BH-A0DK-01A-21R-A056-07	Tumor	Yes	No	FEMALE	WHITE	49	Pre (<6 months since LMP AND no prior bilateral ovariectomy AND not on estrogen replacement)	Left Upper Outer Quadrant;Left	Excisional Biopsy	Infiltrating Ductal Carcinoma	No	Simple Mastectomy	Sentinel node biopsy alone	Negative	3	0	N0 (i-)	T2	Stage IIA	M0	NO	Not Available	TAMOXIFEN	Not Available	ADJUVANT		Positive	Not Available	Positive	Not Available	Negative	0	Not Available	Alive	TUMOR FREE	0	423	0	423
TCGA-BH-A0DK-11A-13R-A089-07	Normal	Yes	No	FEMALE	WHITE	49	Pre (<6 months since LMP AND no prior bilateral ovariectomy AND not on estrogen replacement)	Left Upper Outer Quadrant;Left	Excisional Biopsy	Infiltrating Ductal Carcinoma	No	Simple Mastectomy	Sentinel node biopsy alone	Negative	3	0	N0 (i-)	T2	Stage IIA	M0	NO	Not Available	TAMOXIFEN	Not Available	ADJUVANT		Positive	Not Available	Positive	Not Available	Negative	0	Not Available	Alive	TUMOR FREE	0	423	0	423
TCGA-BH-A0DL-01A-11R-A115-07	Tumor	Yes	No	FEMALE	WHITE	64	Post (prior bilateral ovariectomy OR >12 mo since LMP with no prior hysterectomy)	Left	Core needle biopsy	Other, specify	No	Other	Not Available	Negative	3	0	N0	T2	Stage IIA	M0	YES	Not Available	Cytoxan;Taxotere	Complete Response;Complete Response	Not Available;Not Available		Positive	Not Available	Negative	Not Available	Negative	Not Available	Not Available	Alive	TUMOR FREE	0	2381	0	2381
TCGA-BH-A0DL-11A-13R-A115-07	Normal	Yes	No	FEMALE	WHITE	64	Post (prior bilateral ovariectomy OR >12 mo since LMP with no prior hysterectomy)	Left	Core needle biopsy	Other, specify	No	Other	Not Available	Negative	3	0	N0	T2	Stage IIA	M0	YES	Not Available	Cytoxan;Taxotere	Complete Response;Complete Response	Not Available;Not Available		Positive	Not Available	Negative	Not Available	Negative	Not Available	Not Available	Alive	TUMOR FREE	0	2381	0	2381
TCGA-BH-A0DO-01B-11R-A12D-07	Tumor	Yes	No	FEMALE	WHITE	78	Post (prior bilateral ovariectomy OR >12 mo since LMP with no prior hysterectomy)	Left Upper Inner Quadrant	Core needle biopsy	Infiltrating Ductal Carcinoma	No	Simple Mastectomy	Not Available	Negative	2	0	N0	T1c	Stage I	M0	NO	Not Available					Positive	Not Available	Positive	Not Available	Negative	Not Available	Not Available	Alive	TUMOR FREE	0	1644	0	1644
TCGA-BH-A0DO-11A-22R-A12D-07	Normal	Yes	No	FEMALE	WHITE	78	Post (prior bilateral ovariectomy OR >12 mo since LMP with no prior hysterectomy)	Left Upper Inner Quadrant	Core needle biopsy	Infiltrating Ductal Carcinoma	No	Simple Mastectomy	Not Available	Negative	2	0	N0	T1c	Stage I	M0	NO	Not Available					Positive	Not Available	Positive	Not Available	Negative	Not Available	Not Available	Alive	TUMOR FREE	0	1644	0	1644
TCGA-BH-A0DP-01A-21R-A056-07	Tumor	Yes	No	FEMALE	WHITE	60	Post (prior bilateral ovariectomy OR >12 mo since LMP with no prior hysterectomy)	Right	Core needle biopsy	Infiltrating Lobular Carcinoma	No	Simple Mastectomy	Sentinel node biopsy alone	Negative	4	0	N0 (i-)	T3	Stage IIB	M0	YES	Not Available	ARIMIDEX	Not Available	ADJUVANT		Positive	80-89%	Positive	80-89%	Negative	0	Not Available	Alive	TUMOR FREE	0	476	0	476
TCGA-BH-A0DP-11A-12R-A089-07	Normal	Yes	No	FEMALE	WHITE	60	Post (prior bilateral ovariectomy OR >12 mo since LMP with no prior hysterectomy)	Right	Core needle biopsy	Infiltrating Lobular Carcinoma	No	Simple Mastectomy	Sentinel node biopsy alone	Negative	4	0	N0 (i-)	T3	Stage IIB	M0	YES	Not Available	ARIMIDEX	Not Available	ADJUVANT		Positive	80-89%	Positive	80-89%	Negative	0	Not Available	Alive	TUMOR FREE	0	476	0	476
TCGA-BH-A0DQ-01A-11R-A084-07	Tumor	Yes	No	FEMALE	WHITE	42	Pre (<6 months since LMP AND no prior bilateral ovariectomy AND not on estrogen replacement)	Right Upper Inner Quadrant;Right	Core needle biopsy	Infiltrating Ductal Carcinoma	No	Other	Sentinel lymph node biopsy plus axillary dissection	Negative	25	1	N1	T2	Stage IIB	M0	YES	Not Available	DOXORUBICIN;CYCLOPHOSPHAMIDE;TAXOL	Not Available;Not Available;Not Available	ADJUVANT;ADJUVANT;ADJUVANT		Positive	60-69%	Positive	70-79%	Negative	0	Not Available	Alive	TUMOR FREE	0	98	0	98
TCGA-BH-A0DQ-11A-12R-A089-07	Normal	Yes	No	FEMALE	WHITE	42	Pre (<6 months since LMP AND no prior bilateral ovariectomy AND not on estrogen replacement)	Right Upper Inner Quadrant;Right	Core needle biopsy	Infiltrating Ductal Carcinoma	No	Other	Sentinel lymph node biopsy plus axillary dissection	Negative	25	1	N1	T2	Stage IIB	M0	YES	Not Available	DOXORUBICIN;CYCLOPHOSPHAMIDE;TAXOL	Not Available;Not Available;Not Available	ADJUVANT;ADJUVANT;ADJUVANT		Positive	60-69%	Positive	70-79%	Negative	0	Not Available	Alive	TUMOR FREE	0	98	0	98
TCGA-BH-A0DS-01A-11R-A056-07	Tumor	Yes	No	FEMALE	WHITE	71	Post (prior bilateral ovariectomy OR >12 mo since LMP with no prior hysterectomy)	Right Upper Inner Quadrant;Right Lower Inner Quadrant;Right	Core needle biopsy	Infiltrating Ductal Carcinoma	No	Other	Sentinel lymph node biopsy plus axillary dissection	Negative	14	8	N2a	T2	Stage IIIA	M0	YES	Not Available	CYCLOPHOSPHAMIDE;TAXOTERE	Not Available;Not Available	ADJUVANT;ADJUVANT		Positive	70-79%	Positive	70-79%	Negative	1+	Not Available	Alive	TUMOR FREE	0	78	0	78
TCGA-BH-A0DT-01A-21R-A12D-07	Tumor	Yes	No	FEMALE	WHITE	41	Pre (<6 months since LMP AND no prior bilateral ovariectomy AND not on estrogen replacement)	Right	Core needle biopsy	Infiltrating Ductal Carcinoma	No	Other	Not Available	Negative	18	1	N1a	T1c	Stage IIA	M0	YES	Not Available	Taxotere;Adriamycin;Cytoxan	Complete Response;Complete Response;Complete Response	Not Available;Not Available;Not Available		Positive	Not Available	Positive	Not Available	Negative	Not Available	Not Available	Alive	TUMOR FREE	0	2403	0	2403
TCGA-BH-A0DT-11A-12R-A12D-07	Normal	Yes	No	FEMALE	WHITE	41	Pre (<6 months since LMP AND no prior bilateral ovariectomy AND not on estrogen replacement)	Right	Core needle biopsy	Infiltrating Ductal Carcinoma	No	Other	Not Available	Negative	18	1	N1a	T1c	Stage IIA	M0	YES	Not Available	Taxotere;Adriamycin;Cytoxan	Complete Response;Complete Response;Complete Response	Not Available;Not Available;Not Available		Positive	Not Available	Positive	Not Available	Negative	Not Available	Not Available	Alive	TUMOR FREE	0	2403	0	2403
TCGA-BH-A0DV-01A-21R-A12P-07	Tumor	Yes	No	FEMALE	WHITE	54	Peri (6-12 months since last menstrual period)	Left Upper Inner Quadrant;Left Lower Inner Quadrant;Left Lower Outer Quadrant;Left	Core needle biopsy	Infiltrating Ductal Carcinoma	No	Modified Radical Mastectomy	Not Available	Negative	9	9	N2a	T2	Stage IIIA	M0	YES	Not Available	Taxotere;Adriamycin;Cytoxan	Complete Response;Complete Response;Complete Response	Not Available;Not Available;Not Available		Positive	Not Available	Positive	Not Available	Negative	Not Available	Not Available	Alive	TUMOR FREE	0	2064	0	2064
TCGA-BH-A0DV-11A-22R-A12P-07	Normal	Yes	No	FEMALE	WHITE	54	Peri (6-12 months since last menstrual period)	Left Upper Inner Quadrant;Left Lower Inner Quadrant;Left Lower Outer Quadrant;Left	Core needle biopsy	Infiltrating Ductal Carcinoma	No	Modified Radical Mastectomy	Not Available	Negative	9	9	N2a	T2	Stage IIIA	M0	YES	Not Available	Taxotere;Adriamycin;Cytoxan	Complete Response;Complete Response;Complete Response	Not Available;Not Available;Not Available		Positive	Not Available	Positive	Not Available	Negative	Not Available	Not Available	Alive	TUMOR FREE	0	2064	0	2064
TCGA-BH-A0DX-01A-11R-A115-07	Tumor	Yes	No	FEMALE	WHITE	62	Post (prior bilateral ovariectomy OR >12 mo since LMP with no prior hysterectomy)	Left Upper Inner Quadrant	Core needle biopsy	Infiltrating Ductal Carcinoma	No	Other	Not Available	Negative	11	0	N0	T1b	Stage I	M0	YES	Not Available	Taxotere;Cytoxan;Cytoxan;Methotrexate	Complete Response;Complete Response;Complete Response;Complete Response	Not Available;Not Available;Not Available;Not Available		Positive	Not Available	Positive	Not Available	Negative	Not Available	Not Available	Alive	TUMOR FREE	0	2156	0	2156
TCGA-BH-A0DZ-01A-11R-A00Z-07	Tumor	Yes	No	FEMALE	WHITE	43	Pre (<6 months since LMP AND no prior bilateral ovariectomy AND not on estrogen replacement)	Right Upper Inner Quadrant;Right Upper Outer Quadrant;Right Lower Inner Quadrant;Right Lower Outer Quadrant;Right	Core needle biopsy	Infiltrating Ductal Carcinoma	No	Simple Mastectomy	Sentinel lymph node biopsy plus axillary dissection	Negative	5	1	N1a	T2	Stage IIB	M0	NO	Not Available	TAMOXIFEN;DOCETAXEL;HERCEPTIN;CARBOPLATIN	Not Available;Not Available;Not Available;Not Available	ADJUVANT;ADJUVANT;ADJUVANT;ADJUVANT	Her-2	Positive	50-59%	Positive	<10%	Positive	3+	Not Available	Alive	TUMOR FREE	0	495	0	495
TCGA-BH-A0DZ-11A-22R-A089-07	Normal	Yes	No	FEMALE	WHITE	43	Pre (<6 months since LMP AND no prior bilateral ovariectomy AND not on estrogen replacement)	Right Upper Inner Quadrant;Right Upper Outer Quadrant;Right Lower Inner Quadrant;Right Lower Outer Quadrant;Right	Core needle biopsy	Infiltrating Ductal Carcinoma	No	Simple Mastectomy	Sentinel lymph node biopsy plus axillary dissection	Negative	5	1	N1a	T2	Stage IIB	M0	NO	Not Available	TAMOXIFEN;DOCETAXEL;HERCEPTIN;CARBOPLATIN	Not Available;Not Available;Not Available;Not Available	ADJUVANT;ADJUVANT;ADJUVANT;ADJUVANT	Her-2	Positive	50-59%	Positive	<10%	Positive	3+	Not Available	Alive	TUMOR FREE	0	495	0	495
TCGA-BH-A0E0-01A-11R-A056-07	Tumor	Yes	No	FEMALE	WHITE	38	Pre (<6 months since LMP AND no prior bilateral ovariectomy AND not on estrogen replacement)	Left Upper Outer Quadrant;Left Lower Outer Quadrant;Left	Core needle biopsy	Infiltrating Ductal Carcinoma	No	Modified Radical Mastectomy	Axillary lymph node dissection alone	Negative	21	10	N3a	T3	Stage IIIC	M0	YES	Not Available	DOCETAXEL;DOXORUBICIN;CYCLOPHOSPHAMIDE	Not Available;Not Available;Not Available	ADJUVANT;ADJUVANT;ADJUVANT	TNBC	Negative	Not Available	Negative	Not Available	Negative	1+	Not Available	Alive	TUMOR FREE	0	134	0	134
TCGA-BH-A0E0-11A-13R-A089-07	Normal	Yes	No	FEMALE	WHITE	38	Pre (<6 months since LMP AND no prior bilateral ovariectomy AND not on estrogen replacement)	Left Upper Outer Quadrant;Left Lower Outer Quadrant;Left	Core needle biopsy	Infiltrating Ductal Carcinoma	No	Modified Radical Mastectomy	Axillary lymph node dissection alone	Negative	21	10	N3a	T3	Stage IIIC	M0	YES	Not Available	DOCETAXEL;DOXORUBICIN;CYCLOPHOSPHAMIDE	Not Available;Not Available;Not Available	ADJUVANT;ADJUVANT;ADJUVANT	TNBC	Negative	Not Available	Negative	Not Available	Negative	1+	Not Available	Alive	TUMOR FREE	0	134	0	134
TCGA-BH-A0E1-01A-11R-A056-07	Tumor	Yes	No	FEMALE	WHITE	52	Peri (6-12 months since last menstrual period)	Left Upper Inner Quadrant;Left	Core needle biopsy	Infiltrating Ductal Carcinoma	No	Simple Mastectomy	Sentinel lymph node biopsy plus axillary dissection	Negative	17	2	N1	T2	Stage IIB	M0	NO	Not Available	CYTOXAN;ADRIAMYCIN;TAXOTERE;ARIMIDEX	Not Available;Not Available;Not Available;Not Available	ADJUVANT;ADJUVANT;ADJUVANT;ADJUVANT		Positive	70-79%	Positive	50-59%	Negative	2+	1.69	Alive	TUMOR FREE	0	477	0	477
TCGA-BH-A0E1-11A-13R-A089-07	Normal	Yes	No	FEMALE	WHITE	52	Peri (6-12 months since last menstrual period)	Left Upper Inner Quadrant;Left	Core needle biopsy	Infiltrating Ductal Carcinoma	No	Simple Mastectomy	Sentinel lymph node biopsy plus axillary dissection	Negative	17	2	N1	T2	Stage IIB	M0	NO	Not Available	CYTOXAN;ADRIAMYCIN;TAXOTERE;ARIMIDEX	Not Available;Not Available;Not Available;Not Available	ADJUVANT;ADJUVANT;ADJUVANT;ADJUVANT		Positive	70-79%	Positive	50-59%	Negative	2+	1.69	Alive	TUMOR FREE	0	477	0	477
TCGA-BH-A0E2-01A-11R-A056-07	Tumor	Yes	No	FEMALE	BLACK OR AFRICAN AMERICAN	49	Pre (<6 months since LMP AND no prior bilateral ovariectomy AND not on estrogen replacement)	Right Upper Inner Quadrant;Right	Core needle biopsy	Infiltrating Ductal Carcinoma	No	Modified Radical Mastectomy	Axillary lymph node dissection alone	Negative	26	4	N2a	T2	Stage IIIA	M0	NO	Not Available	TAMOXIFEN;DOXORUBICIN;CYCLOPHOSPHAMIDE;PACLITAXEL	Not Available;Not Available;Not Available;Not Available	ADJUVANT;ADJUVANT;ADJUVANT;ADJUVANT		Positive	90-99%	Positive	<10%	Negative	1+	Not Available	Alive	TUMOR FREE	0	435	0	435
TCGA-BH-A0E6-01A-11R-A034-07	Tumor	Yes	No	FEMALE	WHITE	69	Post (prior bilateral ovariectomy OR >12 mo since LMP with no prior hysterectomy)	Left Upper Inner Quadrant;Left Upper Outer Quadrant;Left	Core needle biopsy	Infiltrating Ductal Carcinoma	No	Other	Sentinel node biopsy alone	Negative	1	0	N0 (i-)	T1c	Stage IA	M0	YES	Not Available	CYTOXAN;TAXOTERE	Not Available;Not Available	ADJUVANT;ADJUVANT	TNBC	Negative	Not Available	Negative	Not Available	Negative	2+	1.19	Alive	TUMOR FREE	0	293	0	293
TCGA-BH-A0E7-01A-11R-A034-07	Tumor	Yes	No	FEMALE	WHITE	79	Post (prior bilateral ovariectomy OR >12 mo since LMP with no prior hysterectomy)	Left Upper Outer Quadrant;Left	Excisional Biopsy	Infiltrating Ductal Carcinoma	No	Other	Axillary lymph node dissection alone	Negative	17	1	N1a	T2	Stage IIB	M0	YES	Not Available	ARIMIDEX	Not Available	ADJUVANT		Positive	50-59%	Positive	60-69%	Negative	1+	Not Available	Alive	TUMOR FREE	0	1363	0	1363
TCGA-BH-A0E9-01B-11R-A115-07	Tumor	Yes	No	FEMALE	WHITE	53	Post (prior bilateral ovariectomy OR >12 mo since LMP with no prior hysterectomy)	Right	Core needle biopsy	Infiltrating Lobular Carcinoma	No	Modified Radical Mastectomy	Not Available	Negative	12	3	N1a	T2	Stage IIB	M0	YES	Not Available	Taxotere;Adriamycin;Cytoxan	Complete Response;Complete Response;Complete Response	Not Available;Not Available;Not Available		Positive	Not Available	Positive	Not Available	Negative	Not Available	Not Available	Alive	TUMOR FREE	0	2489	0	2489
TCGA-BH-A0EA-01A-11R-A115-07	Tumor	Yes	No	FEMALE	WHITE	72	Post (prior bilateral ovariectomy OR >12 mo since LMP with no prior hysterectomy)	Left	Core needle biopsy	Infiltrating Ductal Carcinoma	No	Other	Not Available	Negative	4	2	N1a	T1c	Stage IIA	M0	NO	Not Available	Taxotere;Cytoxan	Complete Response;Complete Response	Not Available;Not Available		Positive	Not Available	Positive	Not Available	Negative	Not Available	Not Available	Dead	TUMOR FREE	1	991	0	991
TCGA-BH-A0EB-01A-11R-A034-07	Tumor	Yes	No	FEMALE	WHITE	69	Post (prior bilateral ovariectomy OR >12 mo since LMP with no prior hysterectomy)	Right Lower Inner Quadrant;Right	Core needle biopsy	Infiltrating Ductal Carcinoma	No	Other	Sentinel lymph node biopsy plus axillary dissection	Negative	4	0	N0 (i-)	T1c	Stage IA	M0	YES	Not Available	ARIMIDEX	Not Available	ADJUVANT		Positive	90-99%	Positive	40-49%	Negative	2+	1.25	Alive	TUMOR FREE	0	745	0	745
TCGA-BH-A0EE-01A-11R-A034-07	Tumor	Yes	No	FEMALE	WHITE	68	Post (prior bilateral ovariectomy OR >12 mo since LMP with no prior hysterectomy)	Right Upper Inner Quadrant;Right	Core needle biopsy	Infiltrating Ductal Carcinoma	No	Simple Mastectomy	Sentinel node biopsy alone	Negative	1	0	N0 (i-)	T3	Stage IIB	M0	NO	Not Available	Docetaxel;Docetaxel;Carboplatin;Trastuzumab	Not Available;Not Available;Not Available;Not Available	ADJUVANT;ADJUVANT;ADJUVANT;ADJUVANT	Her-2	Negative	Not Available	Negative	Not Available	Positive	3+	Not Available	Alive	TUMOR FREE	0	943	0	943
TCGA-BH-A0EI-01A-11R-A115-07	Tumor	Yes	No	FEMALE	WHITE	51	Peri (6-12 months since last menstrual period)	Right	Core needle biopsy	Infiltrating Ductal Carcinoma	No	Other	Not Available	Negative	2	2	N1a	T1c	Stage IIA	M0	YES	Not Available					Positive	Not Available	Positive	Not Available	Negative	Not Available	Not Available	Alive	TUMOR FREE	0	1926	0	1926
TCGA-BH-A0GY-01A-11R-A056-07	Tumor	Yes	No	FEMALE	WHITE	67	Post (prior bilateral ovariectomy OR >12 mo since LMP with no prior hysterectomy)	Left Lower Outer Quadrant;Left	Core needle biopsy	Infiltrating Ductal Carcinoma	No	Other	Sentinel lymph node biopsy plus axillary dissection	Negative	26	3	N1	T2	Stage IIA	M0	YES	Not Available	Arimidex;Cyotxan;Adriamycin	Not Available;Not Available;Not Available	ADJUVANT;ADJUVANT;ADJUVANT		Positive	40-49%	Positive	90-99%	Negative	1+	Not Available	Alive	TUMOR FREE	0	923	0	923
TCGA-BH-A0GZ-01A-11R-A056-07	Tumor	Yes	No	FEMALE	WHITE	62	Post (prior bilateral ovariectomy OR >12 mo since LMP with no prior hysterectomy)	Left Upper Inner Quadrant;Left	Core needle biopsy	Infiltrating Ductal Carcinoma	No	Other	Sentinel lymph node biopsy plus axillary dissection	Negative	14	1	N1a	T1c	Stage IIA	M0	YES	Not Available	ARIMIDEX	Not Available	ADJUVANT		Positive	90-99%	Positive	80-89%	Negative	2+	1.05	Alive	TUMOR FREE	0	328	0	328
TCGA-BH-A0H0-01A-11R-A056-07	Tumor	Yes	No	FEMALE	WHITE	69	Post (prior bilateral ovariectomy OR >12 mo since LMP with no prior hysterectomy)	Right Upper Outer Quadrant;Right	Core needle biopsy	Infiltrating Ductal Carcinoma	No	Other	Sentinel node biopsy alone	Negative	2	0	N0 (i-)	T1c	Stage IA	M0	YES	Not Available	ARIMIDEX	Not Available	ADJUVANT		Positive	50-59%	Positive	<10%	Negative	0	Not Available	Alive	TUMOR FREE	0	461	0	461
TCGA-BH-A0H3-01A-11R-A12P-07	Tumor	Yes	No	FEMALE	WHITE	46	Pre (<6 months since LMP AND no prior bilateral ovariectomy AND not on estrogen replacement)	Left Upper Outer Quadrant	Core needle biopsy	Infiltrating Ductal Carcinoma	No	Other	Not Available	Negative	2	0	N0	T1c	Stage I	M0	YES	Not Available					Positive	Not Available	Positive	Not Available	Negative	Not Available	Not Available	Alive	TUMOR FREE	0	1928	0	1928
TCGA-BH-A0H5-01A-21R-A115-07	Tumor	Yes	No	FEMALE	WHITE	45	Post (prior bilateral ovariectomy OR >12 mo since LMP with no prior hysterectomy)	Right Upper Outer Quadrant	Core needle biopsy	Infiltrating Ductal Carcinoma	No	Other	Not Available	Negative	1	0	N0 (i-)	T1c	Stage I	M0	NO	Not Available	Cytoxan;Taxotere	Complete Response;Complete Response	Not Available;Not Available		Positive	Not Available	Positive	Not Available	Negative	Not Available	Not Available	Alive	TUMOR FREE	0	1620	0	1620
TCGA-BH-A0H5-11A-62R-A115-07	Normal	Yes	No	FEMALE	WHITE	45	Post (prior bilateral ovariectomy OR >12 mo since LMP with no prior hysterectomy)	Right Upper Outer Quadrant	Core needle biopsy	Infiltrating Ductal Carcinoma	No	Other	Not Available	Negative	1	0	N0 (i-)	T1c	Stage I	M0	NO	Not Available	Cytoxan;Taxotere	Complete Response;Complete Response	Not Available;Not Available		Positive	Not Available	Positive	Not Available	Negative	Not Available	Not Available	Alive	TUMOR FREE	0	1620	0	1620
TCGA-BH-A0H6-01A-21R-A056-07	Tumor	Yes	No	FEMALE	WHITE	82	Post (prior bilateral ovariectomy OR >12 mo since LMP with no prior hysterectomy)	Right Upper Inner Quadrant;Right Upper Outer Quadrant;Right	Core needle biopsy	Infiltrating Ductal Carcinoma	No	Other	No axillary staging	Negative	0	0	NX	T1b	Stage I	M0	YES	Not Available					Positive	50-59%	Positive	60-69%	Negative	1+	Not Available	Alive	TUMOR FREE	0	747	0	747
TCGA-BH-A0H7-01A-13R-A056-07	Tumor	Yes	No	FEMALE	WHITE	65	Post (prior bilateral ovariectomy OR >12 mo since LMP with no prior hysterectomy)	Right Upper Inner Quadrant;Right Upper Outer Quadrant;Right Lower Inner Quadrant;Right Lower Outer Quadrant;Right	Core needle biopsy	Infiltrating Ductal Carcinoma	No	Modified Radical Mastectomy	Axillary lymph node dissection alone	Negative	16	6	N2a	T1c	Stage IIIA	M0	YES	Not Available	ARIMIDEX;DOXORUBICIN;BEVACIZUMAB (AVASTIN)/PLACEBO PROVIDED BY STUDY;PACLITAXEL;CYCLOPHOSPHAMIDE	Not Available;Not Available;Not Available;Not Available;Not Available	ADJUVANT;ADJUVANT;ADJUVANT;ADJUVANT;ADJUVANT		Positive	70-79%	Positive	30-39%	Negative	1+	Not Available	Alive	TUMOR FREE	0	702	0	702
TCGA-BH-A0H7-11A-13R-A089-07	Normal	Yes	No	FEMALE	WHITE	65	Post (prior bilateral ovariectomy OR >12 mo since LMP with no prior hysterectomy)	Right Upper Inner Quadrant;Right Upper Outer Quadrant;Right Lower Inner Quadrant;Right Lower Outer Quadrant;Right	Core needle biopsy	Infiltrating Ductal Carcinoma	No	Modified Radical Mastectomy	Axillary lymph node dissection alone	Negative	16	6	N2a	T1c	Stage IIIA	M0	YES	Not Available	ARIMIDEX;DOXORUBICIN;BEVACIZUMAB (AVASTIN)/PLACEBO PROVIDED BY STUDY;PACLITAXEL;CYCLOPHOSPHAMIDE	Not Available;Not Available;Not Available;Not Available;Not Available	ADJUVANT;ADJUVANT;ADJUVANT;ADJUVANT;ADJUVANT		Positive	70-79%	Positive	30-39%	Negative	1+	Not Available	Alive	TUMOR FREE	0	702	0	702
TCGA-BH-A0H9-01A-11R-A056-07	Tumor	Yes	No	FEMALE	WHITE	69	Post (prior bilateral ovariectomy OR >12 mo since LMP with no prior hysterectomy)	Right Upper Outer Quadrant;Right	Core needle biopsy	Infiltrating Ductal Carcinoma	No	Other	Sentinel node biopsy alone	Negative	1	0	N0 (i-)	T2	Stage IIA	M0	YES	Not Available	Arimidex	Not Available	ADJUVANT		Positive	90-99%	Positive	30-39%	Negative	2+	1.5	Alive	TUMOR FREE	0	1247	0	1247
TCGA-BH-A0H9-11A-22R-A466-07	Normal	Yes	No	FEMALE	WHITE	69	Post (prior bilateral ovariectomy OR >12 mo since LMP with no prior hysterectomy)	Right Upper Outer Quadrant;Right	Core needle biopsy	Infiltrating Ductal Carcinoma	No	Other	Sentinel node biopsy alone	Negative	1	0	N0 (i-)	T2	Stage IIA	M0	YES	Not Available	Arimidex	Not Available	ADJUVANT		Positive	90-99%	Positive	30-39%	Negative	2+	1.5	Alive	TUMOR FREE	0	1247	0	1247
TCGA-BH-A0HA-01A-11R-A12P-07	Tumor	Yes	No	FEMALE	WHITE	31	Pre (<6 months since LMP AND no prior bilateral ovariectomy AND not on estrogen replacement)	Right	Core needle biopsy	Infiltrating Ductal Carcinoma	No	Other	Not Available	Negative	4	0	N0 (i-)	T1c	Stage I	M0	NO;NO	Not Available					Positive	Not Available	Positive	Not Available	Negative	Not Available	Not Available	Alive	TUMOR FREE	0	1611	0	1611
TCGA-BH-A0HA-11A-31R-A12P-07	Normal	Yes	No	FEMALE	WHITE	31	Pre (<6 months since LMP AND no prior bilateral ovariectomy AND not on estrogen replacement)	Right	Core needle biopsy	Infiltrating Ductal Carcinoma	No	Other	Not Available	Negative	4	0	N0 (i-)	T1c	Stage I	M0	NO;NO	Not Available					Positive	Not Available	Positive	Not Available	Negative	Not Available	Not Available	Alive	TUMOR FREE	0	1611	0	1611
TCGA-BH-A0HB-01A-11R-A056-07	Tumor	Yes	No	FEMALE	WHITE	55	Post (prior bilateral ovariectomy OR >12 mo since LMP with no prior hysterectomy)	Right Upper Outer Quadrant;Right	Core needle biopsy	Infiltrating Ductal Carcinoma	No	Other	Sentinel node biopsy alone	Negative	2	0	N0 (i-)	T1c	Stage IA	M0	YES	Not Available	Arimidex;Docetaxel;Cyclophosphamide;Zoledronic Acid	Not Available;Not Available;Not Available;Not Available	ADJUVANT;ADJUVANT;ADJUVANT;ADJUVANT		Positive	90-99%	Positive	30-39%	Negative	2+	1.21	Alive	TUMOR FREE	0	806	0	806
TCGA-BH-A0HF-01A-11R-A056-07	Tumor	Yes	No	FEMALE	WHITE	77	Post (prior bilateral ovariectomy OR >12 mo since LMP with no prior hysterectomy)	Right Upper Outer Quadrant;Right	Core needle biopsy	Infiltrating Ductal Carcinoma	No	Other	Sentinel node biopsy alone	Negative	2	0	N0 (i-)	T1c	Stage IA	M0	YES	Not Available	Arimidex	Not Available	ADJUVANT		Positive	90-99%	Positive	<10%	Negative	0	Not Available	Alive	TUMOR FREE	0	727	0	727
TCGA-BH-A0HI-01A-11R-A084-07	Tumor	Yes	No	FEMALE	WHITE	78	Post (prior bilateral ovariectomy OR >12 mo since LMP with no prior hysterectomy)	Right Upper Inner Quadrant;Right Lower Inner Quadrant;Right	Core needle biopsy	Infiltrating Ductal Carcinoma	No	Other	Sentinel node biopsy alone	Negative	1	0	N0 (i-)	T1c	Stage IA	M0	YES	Not Available	Arimidex	Not Available	ADJUVANT		Positive	50-59%	Positive	40-49%	Negative	1+	Not Available	Alive	TUMOR FREE	0	620	0	620
TCGA-BH-A0HK-01A-11R-A056-07	Tumor	Yes	No	FEMALE	WHITE	81	Post (prior bilateral ovariectomy OR >12 mo since LMP with no prior hysterectomy)	Right Upper Inner Quadrant;Right	Core needle biopsy	Infiltrating Ductal Carcinoma	No	Modified Radical Mastectomy	Axillary lymph node dissection alone	Negative	17	2	N1	T2	Stage IIB	M0	NO	Not Available	ARIMIDEX	Not Available	ADJUVANT		Positive	70-79%	Negative	<10%	Negative	0	Not Available	Alive	TUMOR FREE	0	178	0	178
TCGA-BH-A0HK-11A-11R-A089-07	Normal	Yes	No	FEMALE	WHITE	81	Post (prior bilateral ovariectomy OR >12 mo since LMP with no prior hysterectomy)	Right Upper Inner Quadrant;Right	Core needle biopsy	Infiltrating Ductal Carcinoma	No	Modified Radical Mastectomy	Axillary lymph node dissection alone	Negative	17	2	N1	T2	Stage IIB	M0	NO	Not Available	ARIMIDEX	Not Available	ADJUVANT		Positive	70-79%	Negative	<10%	Negative	0	Not Available	Alive	TUMOR FREE	0	178	0	178
TCGA-BH-A0HL-01A-11R-A10U-07	Tumor	Yes	No	FEMALE	WHITE	56	Post (prior bilateral ovariectomy OR >12 mo since LMP with no prior hysterectomy)	Right Lower Inner Quadrant;Right Lower Outer Quadrant;Right	Core needle biopsy	Infiltrating Ductal Carcinoma	No	Modified Radical Mastectomy	Sentinel lymph node biopsy plus axillary dissection	Negative	17	2	N1a	T2	Stage IIB	M0	NO	Not Available	CYCLOPHOSPHAMIDE;DOXORUBICIN;ARIMIDEX;TAXOTERE	Not Available;Not Available;Not Available;Not Available	ADJUVANT;ADJUVANT;ADJUVANT;ADJUVANT		Positive	90-99%	Positive	40-49%	Negative	2+	0.99	Alive	TUMOR FREE	0	72	0	72
TCGA-BH-A0HN-01A-11R-A10U-07	Tumor	Yes	No	FEMALE	WHITE	67	Post (prior bilateral ovariectomy OR >12 mo since LMP with no prior hysterectomy)	Left Upper Inner Quadrant;Left Upper Outer Quadrant;Left	Core needle biopsy	Infiltrating Ductal Carcinoma	No	Other	Sentinel node biopsy alone	Positive	2	0	N0 (i-)	T1c	Stage IA	M0	NO	Not Available	ARIMIDEX	Not Available	ADJUVANT		Positive	90-99%	Positive	90-99%	Negative	2+	1.13	Alive	TUMOR FREE	0	516	0	516
TCGA-BH-A0HO-01A-11R-A034-07	Tumor	Yes	No	FEMALE	WHITE	48	Pre (<6 months since LMP AND no prior bilateral ovariectomy AND not on estrogen replacement)	Right Upper Outer Quadrant;Right	Core needle biopsy	Infiltrating Ductal Carcinoma	No	Other	Sentinel lymph node biopsy plus axillary dissection	Negative	18	1	N1a	T1c	Stage IIA	M0	YES	Not Available	Cyclophosphamide;Paclitaxel;Doxorubicin;Tamoxifen	Not Available;Not Available;Not Available;Not Available	ADJUVANT;ADJUVANT;ADJUVANT;ADJUVANT		Positive	90-99%	Positive	90-99%	Negative	1+	Not Available	Alive	TUMOR FREE	0	76	0	76
TCGA-BH-A0HP-01A-12R-A084-07	Tumor	Yes	No	FEMALE	WHITE	65	Post (prior bilateral ovariectomy OR >12 mo since LMP with no prior hysterectomy)	Left Upper Inner Quadrant;Left Upper Outer Quadrant;Left Lower Inner Quadrant;Left Lower Outer Quadrant;Left	Core needle biopsy	Infiltrating Lobular Carcinoma	No	Modified Radical Mastectomy	Axillary lymph node dissection alone	Negative	17	8	N2a	T3	Stage IIIA	M0	YES	Not Available	Paclitaxel;Doxorubicin;Cyclophosphamide;Arimidex	Not Available;Not Available;Not Available;Not Available	ADJUVANT;ADJUVANT;ADJUVANT;ADJUVANT		Positive	80-89%	Negative	Not Available	Negative	1+	Not Available	Alive	TUMOR FREE	0	414	0	414
TCGA-BH-A0HQ-01A-11R-A034-07	Tumor	Yes	No	FEMALE	WHITE	56	Post (prior bilateral ovariectomy OR >12 mo since LMP with no prior hysterectomy)	Left Upper Outer Quadrant;Left	Core needle biopsy	Infiltrating Ductal Carcinoma	No	Other	Sentinel node biopsy alone	Negative	4	0	N0 (i+)	T2	Stage IIA	M0	YES	Not Available	Arimidex	Not Available	ADJUVANT		Positive	90-99%	Positive	90-99%	Negative	1+	Not Available	Alive	TUMOR FREE	0	1121	0	1121
TCGA-BH-A0HU-01A-11R-A034-07	Tumor	Yes	No	FEMALE	WHITE	52	Peri (6-12 months since last menstrual period)	Right Upper Outer Quadrant;Right	Core needle biopsy	Infiltrating Ductal Carcinoma	No	Other	Sentinel node biopsy alone	Negative	1	0	N0 (i-)	T1c	Stage IA	M0	YES	Not Available	Tamoxifen;Docetaxel;Cyclophosphamide	Not Available;Not Available;Not Available	ADJUVANT;ADJUVANT;ADJUVANT		Positive	40-49%	Positive	40-49%	Negative	1+	Not Available	Alive	TUMOR FREE	0	392	0	392
TCGA-BH-A0HW-01A-11R-A034-07	Tumor	Yes	No	FEMALE	ASIAN	62	Post (prior bilateral ovariectomy OR >12 mo since LMP with no prior hysterectomy)	Left Lower Inner Quadrant;Left Lower Outer Quadrant;Left	Core needle biopsy	Infiltrating Ductal Carcinoma	No	Other	Sentinel node biopsy alone	Negative	2	0	N0 (i-)	T1c	Stage IA	M0	YES	Not Available	Arimidex;Doxorubicin;Cyclophosphamide	Not Available;Not Available;Not Available	ADJUVANT;ADJUVANT;ADJUVANT		Positive	90-99%	Negative	<10%	Negative	2+	1.6	Alive	TUMOR FREE	0	1561	0	1561
TCGA-BH-A0HX-01A-21R-A056-07	Tumor	Yes	No	FEMALE	WHITE	54	Post (prior bilateral ovariectomy OR >12 mo since LMP with no prior hysterectomy)	Left Upper Inner Quadrant;Left Upper Outer Quadrant;Left Lower Inner Quadrant;Left Lower Outer Quadrant;Left	Core needle biopsy	Infiltrating Ductal Carcinoma	No	Simple Mastectomy	Sentinel lymph node biopsy plus axillary dissection	Negative	24	2	N1a	T2	Stage IIB	M0	NO	Not Available	Arimidex;Adrimycin;Taxotere;Cytoxan	Not Available;Not Available;Not Available;Not Available	ADJUVANT;ADJUVANT;ADJUVANT;ADJUVANT		Positive	80-89%	Positive	50-59%	Negative	Not Available	Not Available	Alive	TUMOR FREE	0	829	0	829
TCGA-BH-A0HY-01A-11R-A056-07	Tumor	Yes	No	FEMALE	WHITE	60	Post (prior bilateral ovariectomy OR >12 mo since LMP with no prior hysterectomy)	Left	Core needle biopsy	Infiltrating Ductal Carcinoma	No	Other	Not Available	Negative	3	0	N0	T1c	Stage I	M0	NO;NO	Not Available	Taxotere;Carboplatin;Herceptin	Complete Response;Complete Response;Complete Response	Not Available;Not Available;Not Available	Her-2	Positive	Not Available	Negative	Not Available	Positive	Not Available	Not Available	Alive	TUMOR FREE	0	1545	0	1545
TCGA-BH-A0RX-01A-21R-A084-07	Tumor	Yes	No	FEMALE	WHITE	59	Post (prior bilateral ovariectomy OR >12 mo since LMP with no prior hysterectomy)	Left Upper Outer Quadrant;Left	Core needle biopsy	Infiltrating Ductal Carcinoma	No	Other	Sentinel node biopsy alone	Negative	3	0	N0 (i-)	T2	Stage IIA	M0	YES	Not Available	Fluorouracil;Cyclophosphamide;Methotrexate	Not Available;Not Available;Not Available	ADJUVANT;ADJUVANT;ADJUVANT	TNBC	Negative	<10%	Negative	<10%	Negative	1+	Not Available	Alive	TUMOR FREE	0	170	0	170
TCGA-BH-A0W3-01A-11R-A109-07	Tumor	Yes	No	FEMALE	WHITE	58	Peri (6-12 months since last menstrual period)	Left Upper Inner Quadrant	Core needle biopsy	Infiltrating Ductal Carcinoma	No	Other	Not Available	Not Available	4	1	N1a	T1c	Stage IIA	M0	YES	Not Available					Positive	Not Available	Positive	Not Available	Negative	Not Available	Not Available	Alive	TUMOR FREE	0	728	0	728
TCGA-BH-A0W4-01A-11R-A109-07	Tumor	Yes	No	FEMALE	WHITE	46	Pre	Left Upper Outer Quadrant	Core needle biopsy	Infiltrating Ductal Carcinoma	No	Other	Not Available	Not Available	3	Not Available	N0 (i-)	T2	Stage IIA	M0	NO	Not Available					Positive	Not Available	Positive	Not Available	Negative	Not Available	Not Available	Alive	TUMOR FREE	0	759	0	759
TCGA-BH-A0W5-01A-11R-A109-07	Tumor	Yes	No	FEMALE	WHITE	77	Post	Left	Core needle biopsy	Infiltrating Ductal Carcinoma	No	Other	Sentinel lymph node biopsy plus axillary dissection	Negative	11	1	N1a	T1c	Stage IIA	M0	YES	Not Available	Arimidex	Complete Response	Not Available		Positive	Not Available	Positive	Not Available	Negative	Not Available	Not Available	Alive	TUMOR FREE	0	1288	0	1288
TCGA-BH-A0W7-01A-11R-A115-07	Tumor	Yes	No	FEMALE	WHITE	49	Pre	Left Upper Outer Quadrant	Core needle biopsy	Infiltrating Ductal Carcinoma	No	Other	Sentinel node biopsy alone	Negative	2	0	N0 (i-)	T1c	Stage I	M0	YES	Not Available	Taxotere;Cytoxan;Tamoxifen;Arimidex	Complete Response;Complete Response;Complete Response;Complete Response	Not Available;Not Available;Not Available;Not Available		Positive	Not Available	Positive	Not Available	Negative	Not Available	Not Available	Alive	TUMOR FREE	0	1363	0	1363
TCGA-BH-A0WA-01A-11R-A109-07	Tumor	Yes	No	FEMALE	WHITE	82	Post	Right Upper Outer Quadrant	Fine needle aspiration biopsy	Not Available	No	Other	Axillary lymph node dissection alone	Negative	3	0	N0 (i-)	T1c	Stage I	M0	NO	Not Available				TNBC	Negative	Not Available	Negative	Not Available	Negative	Not Available	Not Available	Alive	TUMOR FREE	0	701	0	701
TCGA-BH-A18F-01A-11R-A12D-07	Tumor	Yes	No	FEMALE	WHITE	50	Peri (6-12 months since last menstrual period)	Right Lower Outer Quadrant	Core needle biopsy	Infiltrating Ductal Carcinoma	No	Other	Sentinel node biopsy alone	Negative	1	0	N0	T2	Stage IIA	M0	YES	Not Available	Taxotere;Cytoxan	Complete Response;Complete Response	Not Available;Not Available		Positive	70-79%	Positive	40-49%	Negative	Not Available	Not Available	Alive	TUMOR FREE	0	1001	0	1001
TCGA-BH-A18G-01A-11R-A12D-07	Tumor	Yes	No	FEMALE	WHITE	81	Post (prior bilateral ovariectomy OR >12 mo since LMP with no prior hysterectomy)	Right	Core needle biopsy	Infiltrating Ductal Carcinoma	No	Other	Sentinel lymph node biopsy plus axillary dissection	Negative	3	0	N0	T1c	Stage IA	M0	YES	Not Available				TNBC	Negative	Not Available	Negative	Not Available	Negative	Not Available	Not Available	Alive	TUMOR FREE	0	149	0	149
TCGA-BH-A18H-01A-11R-A12D-07	Tumor	Yes	No	FEMALE	WHITE	63	Post (prior bilateral ovariectomy OR >12 mo since LMP with no prior hysterectomy)	Right Upper Outer Quadrant	Core needle biopsy	Infiltrating Ductal Carcinoma	No	Other	Sentinel lymph node biopsy plus axillary dissection	Negative	2	0	N0	T1b	Stage IA	M0	YES	Not Available	Adriamycin;Cytoxan;Taxotere	Complete Response;Complete Response;Complete Response	Not Available;Not Available;Not Available	Her-2	Positive	Not Available	Positive	Not Available	Positive	Not Available	Not Available	Alive	TUMOR FREE	0	652	0	652
TCGA-BH-A18I-01A-11R-A12D-07	Tumor	Yes	No	FEMALE	WHITE	53	Post (prior bilateral ovariectomy OR >12 mo since LMP with no prior hysterectomy)	Left Upper Outer Quadrant	Core needle biopsy	Infiltrating Ductal Carcinoma	No	Other	Sentinel node biopsy alone	Positive	3	1	N1a	T1c	Stage IIA	cM0 (i+)	NO	Not Available	Taxotere;Cytoxan	Complete Response;Complete Response	Not Available;Not Available	Her-2	Positive	Not Available	Positive	Not Available	Positive	Not Available	Not Available	Alive	TUMOR FREE	0	1093	0	1093
TCGA-BH-A18J-01A-11R-A12D-07	Tumor	Yes	No	FEMALE	WHITE	56	Peri (6-12 months since last menstrual period)	Right	Not Available	Infiltrating Ductal Carcinoma	No	Modified Radical Mastectomy	Not Available	Negative	Not Available	Not Available	N2	T4b	Stage IV	M1		Not Available					Positive	40-49%	Positive	30-39%	Negative	Not Available	Not Available	Dead	WITH TUMOR	1	612	1	612
TCGA-BH-A18J-11A-31R-A12D-07	Normal	Yes	No	FEMALE	WHITE	56	Peri (6-12 months since last menstrual period)	Right	Not Available	Infiltrating Ductal Carcinoma	No	Modified Radical Mastectomy	Not Available	Negative	Not Available	Not Available	N2	T4b	Stage IV	M1		Not Available					Positive	40-49%	Positive	30-39%	Negative	Not Available	Not Available	Dead	WITH TUMOR	1	612	1	612
TCGA-BH-A18K-01A-11R-A12D-07	Tumor	Yes	No	FEMALE	WHITE	46	Pre	Left Lower Inner Quadrant	Core needle biopsy	Infiltrating Ductal Carcinoma	No	Other	Sentinel lymph node biopsy plus axillary dissection	Negative	11	0	N0	T1	Stage I	M0		Not Available					Positive	Not Available	Positive	Not Available	Negative	Not Available	Not Available	Dead	WITH TUMOR	1	2763	1	2763
TCGA-BH-A18K-11A-13R-A12D-07	Normal	Yes	No	FEMALE	WHITE	46	Pre	Left Lower Inner Quadrant	Core needle biopsy	Infiltrating Ductal Carcinoma	No	Other	Sentinel lymph node biopsy plus axillary dissection	Negative	11	0	N0	T1	Stage I	M0		Not Available					Positive	Not Available	Positive	Not Available	Negative	Not Available	Not Available	Dead	WITH TUMOR	1	2763	1	2763
TCGA-BH-A18L-01A-32R-A12D-07	Tumor	Yes	No	FEMALE	WHITE	50	Not Available	Left Upper Outer Quadrant	Core needle biopsy	Infiltrating Ductal Carcinoma	No	Other	Sentinel node biopsy alone	Negative	3	1	N1mi	T3	Stage IIIA	M0		Not Available					Positive	Not Available	Positive	Not Available	Negative	Not Available	Not Available	Dead		1	811	0	811
TCGA-BH-A18L-11A-42R-A12D-07	Normal	Yes	No	FEMALE	WHITE	50	Not Available	Left Upper Outer Quadrant	Core needle biopsy	Infiltrating Ductal Carcinoma	No	Other	Sentinel node biopsy alone	Negative	3	1	N1mi	T3	Stage IIIA	M0		Not Available					Positive	Not Available	Positive	Not Available	Negative	Not Available	Not Available	Dead		1	811	0	811
TCGA-BH-A18M-01A-11R-A12D-07	Tumor	Yes	No	FEMALE	WHITE	39	Pre	Left Upper Inner Quadrant	Core needle biopsy	Infiltrating Ductal Carcinoma	No	Modified Radical Mastectomy	Not Available	Negative	6	4	N1	T3	Stage IIIA	M0		Not Available				Her-2	Positive	Not Available	Positive	Not Available	Positive	Not Available	Not Available	Dead		1	2207	0	2207
TCGA-BH-A18M-11A-33R-A12D-07	Normal	Yes	No	FEMALE	WHITE	39	Pre	Left Upper Inner Quadrant	Core needle biopsy	Infiltrating Ductal Carcinoma	No	Modified Radical Mastectomy	Not Available	Negative	6	4	N1	T3	Stage IIIA	M0		Not Available				Her-2	Positive	Not Available	Positive	Not Available	Positive	Not Available	Not Available	Dead		1	2207	0	2207
TCGA-BH-A18N-01A-11R-A12D-07	Tumor	Yes	No	FEMALE	WHITE	88	Post	Left	Fine needle aspiration biopsy	Infiltrating Ductal Carcinoma	No	Modified Radical Mastectomy	Axillary lymph node dissection alone	Negative	26	2	N1b	T2	Stage IIA	M0	NO	Not Available					Positive	Not Available	Positive	Not Available	Negative	Not Available	Not Available	Dead		1	1148	0	1148
TCGA-BH-A18N-11A-43R-A12D-07	Normal	Yes	No	FEMALE	WHITE	88	Post	Left	Fine needle aspiration biopsy	Infiltrating Ductal Carcinoma	No	Modified Radical Mastectomy	Axillary lymph node dissection alone	Negative	26	2	N1b	T2	Stage IIA	M0	NO	Not Available					Positive	Not Available	Positive	Not Available	Negative	Not Available	Not Available	Dead		1	1148	0	1148
TCGA-BH-A18P-01A-11R-A12D-07	Tumor	Yes	No	FEMALE	WHITE	60	Post	Left Lower Inner Quadrant	Fine needle aspiration biopsy	Infiltrating Ductal Carcinoma	No	Simple Mastectomy	Sentinel node biopsy alone	Negative	2	0	N0	T1	Stage I	M0		Not Available				Her-2	Positive	<10%	Negative	Not Available	Positive	2+	Not Available	Dead	WITH TUMOR	1	921	1	921
TCGA-BH-A18P-11A-43R-A12D-07	Normal	Yes	No	FEMALE	WHITE	60	Post	Left Lower Inner Quadrant	Fine needle aspiration biopsy	Infiltrating Ductal Carcinoma	No	Simple Mastectomy	Sentinel node biopsy alone	Negative	2	0	N0	T1	Stage I	M0		Not Available				Her-2	Positive	<10%	Negative	Not Available	Positive	2+	Not Available	Dead	WITH TUMOR	1	921	1	921
TCGA-BH-A18Q-01A-12R-A12D-07	Tumor	Yes	No	FEMALE	WHITE	56	Peri (6-12 months since last menstrual period)	Left	Core needle biopsy	Infiltrating Ductal Carcinoma	No	Modified Radical Mastectomy	Axillary lymph node dissection alone	Negative	25	2	N1b	T2	Stage IIB	M0		Not Available				Her-2	Negative	Not Available	Negative	Not Available	Positive	Not Available	Not Available	Dead		1	1692	0	1692
TCGA-BH-A18Q-11A-34R-A12D-07	Normal	Yes	No	FEMALE	WHITE	56	Peri (6-12 months since last menstrual period)	Left	Core needle biopsy	Infiltrating Ductal Carcinoma	No	Modified Radical Mastectomy	Axillary lymph node dissection alone	Negative	25	2	N1b	T2	Stage IIB	M0		Not Available				Her-2	Negative	Not Available	Negative	Not Available	Positive	Not Available	Not Available	Dead		1	1692	0	1692
TCGA-BH-A18R-01A-11R-A12D-07	Tumor	Yes	No	FEMALE	WHITE	50	Not Available	Right Upper Outer Quadrant	Incisional Biopsy	Infiltrating Ductal Carcinoma	No	Modified Radical Mastectomy	Not Available	Negative	15	10	N1	T2b	Stage IIA	M0		Not Available				Her-2	Positive	20-29%	Negative	Not Available	Positive	3+	Not Available	Dead	TUMOR FREE	1	1142	0	1142
TCGA-BH-A18R-11A-42R-A12D-07	Normal	Yes	No	FEMALE	WHITE	50	Not Available	Right Upper Outer Quadrant	Incisional Biopsy	Infiltrating Ductal Carcinoma	No	Modified Radical Mastectomy	Not Available	Negative	15	10	N1	T2b	Stage IIA	M0		Not Available				Her-2	Positive	20-29%	Negative	Not Available	Positive	3+	Not Available	Dead	TUMOR FREE	1	1142	0	1142
TCGA-BH-A18S-01A-11R-A12D-07	Tumor	Yes	No	FEMALE	WHITE	79	Post (prior bilateral ovariectomy OR >12 mo since LMP with no prior hysterectomy)	Right Lower Inner Quadrant	Core needle biopsy	Mucinous Carcinoma	No	Other	Sentinel node biopsy alone	Negative	2	0	N0	T1c	Stage I	M0		Not Available					Positive	Not Available	Positive	Not Available	Negative	Not Available	Not Available	Dead	TUMOR FREE	1	2009	0	2009
TCGA-BH-A18S-11A-43R-A12D-07	Normal	Yes	No	FEMALE	WHITE	79	Post (prior bilateral ovariectomy OR >12 mo since LMP with no prior hysterectomy)	Right Lower Inner Quadrant	Core needle biopsy	Mucinous Carcinoma	No	Other	Sentinel node biopsy alone	Negative	2	0	N0	T1c	Stage I	M0		Not Available					Positive	Not Available	Positive	Not Available	Negative	Not Available	Not Available	Dead	TUMOR FREE	1	2009	0	2009
TCGA-BH-A18T-01A-11R-A12D-07	Tumor	Yes	No	FEMALE	WHITE	70	Post (prior bilateral ovariectomy OR >12 mo since LMP with no prior hysterectomy)	Right Upper Outer Quadrant	Fine needle aspiration biopsy	Infiltrating Ductal Carcinoma	No	Other	Sentinel node biopsy alone	Negative	Not Available	Not Available	N0	T2	Stage IIA	M0		Not Available				Her-2	Negative	Not Available	Negative	Not Available	Positive	2+	Not Available	Dead	WITH TUMOR	1	224	1	224
TCGA-BH-A18U-01A-21R-A12D-07	Tumor	Yes	No	FEMALE	WHITE	72	Post (prior bilateral ovariectomy OR >12 mo since LMP with no prior hysterectomy)	Left	Core needle biopsy	Infiltrating Ductal Carcinoma	No	Other	Sentinel lymph node biopsy plus axillary dissection	Negative	16	9	N2a	T2	Stage IIIA	M0		Not Available				Her-2	Positive	Not Available	Positive	Not Available	Positive	3+	Not Available	Dead	TUMOR FREE	1	1563	0	1563
TCGA-BH-A18U-11A-23R-A12D-07	Normal	Yes	No	FEMALE	WHITE	72	Post (prior bilateral ovariectomy OR >12 mo since LMP with no prior hysterectomy)	Left	Core needle biopsy	Infiltrating Ductal Carcinoma	No	Other	Sentinel lymph node biopsy plus axillary dissection	Negative	16	9	N2a	T2	Stage IIIA	M0		Not Available				Her-2	Positive	Not Available	Positive	Not Available	Positive	3+	Not Available	Dead	TUMOR FREE	1	1563	0	1563
TCGA-BH-A18V-01A-11R-A12D-07	Tumor	Yes	No	FEMALE	WHITE	48	Pre	Right	Core needle biopsy	Infiltrating Ductal Carcinoma	No	Other	Axillary lymph node dissection alone	Negative	25	0	N1b	T2	Stage IIB	M0		Not Available				TNBC	Negative	Not Available	Negative	Not Available	Negative	Not Available	Not Available	Dead		1	1556	0	1556
TCGA-BH-A18V-06A-11R-A213-07	Tumor	Yes	Yes	FEMALE	WHITE	48	Pre	Right	Core needle biopsy	Infiltrating Ductal Carcinoma	No	Other	Axillary lymph node dissection alone	Negative	25	0	N1b	T2	Stage IIB	M0		Not Available				TNBC	Negative	Not Available	Negative	Not Available	Negative	Not Available	Not Available	Dead		1	1556	0	1556
TCGA-BH-A18V-11A-52R-A12D-07	Normal	Yes	No	FEMALE	WHITE	48	Pre	Right	Core needle biopsy	Infiltrating Ductal Carcinoma	No	Other	Axillary lymph node dissection alone	Negative	25	0	N1b	T2	Stage IIB	M0		Not Available				TNBC	Negative	Not Available	Negative	Not Available	Negative	Not Available	Not Available	Dead		1	1556	0	1556
TCGA-BH-A1EN-01A-11R-A13Q-07	Tumor	Yes	No	FEMALE	WHITE	78	Post (prior bilateral ovariectomy OR >12 mo since LMP with no prior hysterectomy)	Right	Excisional Biopsy	Infiltrating Ductal Carcinoma	No	Other	Not Available	Negative	Not Available	Not Available	NX	T2	Stage IIA	M0		Not Available				Her-2	Negative	Not Available	Negative	Not Available	Positive	Not Available	Not Available	Dead	TUMOR FREE	1	2127	0	2127
TCGA-BH-A1EN-11A-23R-A13Q-07	Normal	Yes	No	FEMALE	WHITE	78	Post (prior bilateral ovariectomy OR >12 mo since LMP with no prior hysterectomy)	Right	Excisional Biopsy	Infiltrating Ductal Carcinoma	No	Other	Not Available	Negative	Not Available	Not Available	NX	T2	Stage IIA	M0		Not Available				Her-2	Negative	Not Available	Negative	Not Available	Positive	Not Available	Not Available	Dead	TUMOR FREE	1	2127	0	2127
TCGA-BH-A1EO-01A-11R-A137-07	Tumor	Yes	No	FEMALE	WHITE	68	Post (prior bilateral ovariectomy OR >12 mo since LMP with no prior hysterectomy)	Right	Excisional Biopsy	Mixed Histology (please specify)	No	Other	Not Available	Not Available	15	1	N1	T1c	Stage IIA	M0		Not Available					Positive	Not Available	Positive	Not Available	Negative	Not Available	Not Available	Dead	TUMOR FREE	1	2798	0	2798
TCGA-BH-A1EO-11A-31R-A137-07	Normal	Yes	No	FEMALE	WHITE	68	Post (prior bilateral ovariectomy OR >12 mo since LMP with no prior hysterectomy)	Right	Excisional Biopsy	Mixed Histology (please specify)	No	Other	Not Available	Not Available	15	1	N1	T1c	Stage IIA	M0		Not Available					Positive	Not Available	Positive	Not Available	Negative	Not Available	Not Available	Dead	TUMOR FREE	1	2798	0	2798
TCGA-BH-A1ES-01A-11R-A137-07	Tumor	Yes	No	FEMALE	WHITE	35	Pre (<6 months since LMP AND no prior bilateral ovariectomy AND not on estrogen replacement)	Right Upper Inner Quadrant	Tumor resection	Infiltrating Ductal Carcinoma	No	Other	Not Available	Not Available	4	1	N1a	T2	Stage IIB	M0		Not Available					Positive	Not Available	Positive	Not Available	Negative	Not Available	Not Available	Dead	WITH TUMOR	1	3462	1	3462
TCGA-BH-A1ES-06A-12R-A24H-07	Tumor	Yes	Yes	FEMALE	WHITE	35	Pre (<6 months since LMP AND no prior bilateral ovariectomy AND not on estrogen replacement)	Right Upper Inner Quadrant	Tumor resection	Infiltrating Ductal Carcinoma	No	Other	Not Available	Not Available	4	1	N1a	T2	Stage IIB	M0		Not Available					Positive	Not Available	Positive	Not Available	Negative	Not Available	Not Available	Dead	WITH TUMOR	1	3462	1	3462
TCGA-BH-A1ET-01A-11R-A137-07	Tumor	Yes	No	FEMALE	WHITE	55	Peri (6-12 months since last menstrual period)	Left	Fine needle aspiration biopsy	Infiltrating Ductal Carcinoma	No	Other	Not Available	Not Available	19	1	N0	T1	Stage I	M0		Not Available					Positive	Not Available	Positive	Not Available	Negative	Not Available	Not Available	Dead	TUMOR FREE	1	2520	0	2520
TCGA-BH-A1ET-11B-23R-A137-07	Normal	Yes	No	FEMALE	WHITE	55	Peri (6-12 months since last menstrual period)	Left	Fine needle aspiration biopsy	Infiltrating Ductal Carcinoma	No	Other	Not Available	Not Available	19	1	N0	T1	Stage I	M0		Not Available					Positive	Not Available	Positive	Not Available	Negative	Not Available	Not Available	Dead	TUMOR FREE	1	2520	0	2520
TCGA-BH-A1EU-01A-11R-A137-07	Tumor	Yes	No	FEMALE	WHITE	83	Post (prior bilateral ovariectomy OR >12 mo since LMP with no prior hysterectomy)	Right	Fine needle aspiration biopsy	Infiltrating Ductal Carcinoma	No	Not Available	Not Available	Not Available	Not Available	Not Available	N0	T1	Stage I	M0		Not Available					Positive	Not Available	Positive	Not Available	Negative	Not Available	Not Available	Dead	TUMOR FREE	1	1286	0	1286
TCGA-BH-A1EU-11A-23R-A137-07	Normal	Yes	No	FEMALE	WHITE	83	Post (prior bilateral ovariectomy OR >12 mo since LMP with no prior hysterectomy)	Right	Fine needle aspiration biopsy	Infiltrating Ductal Carcinoma	No	Not Available	Not Available	Not Available	Not Available	Not Available	N0	T1	Stage I	M0		Not Available					Positive	Not Available	Positive	Not Available	Negative	Not Available	Not Available	Dead	TUMOR FREE	1	1286	0	1286
TCGA-BH-A1EV-01A-11R-A137-07	Tumor	Yes	No	FEMALE	WHITE	45	Pre	Left	Fine needle aspiration biopsy	Infiltrating Ductal Carcinoma	No	Modified Radical Mastectomy	Not Available	Not Available	10	3	N1b	T3	Stage IIIA	M0	YES	Not Available				Her-2	Positive	Not Available	Positive	Not Available	Positive	Not Available	Not Available	Dead	WITH TUMOR	1	365	1	365
TCGA-BH-A1EV-11A-24R-A137-07	Normal	Yes	No	FEMALE	WHITE	45	Pre	Left	Fine needle aspiration biopsy	Infiltrating Ductal Carcinoma	No	Modified Radical Mastectomy	Not Available	Not Available	10	3	N1b	T3	Stage IIIA	M0	YES	Not Available				Her-2	Positive	Not Available	Positive	Not Available	Positive	Not Available	Not Available	Dead	WITH TUMOR	1	365	1	365
TCGA-BH-A1EW-01A-11R-A137-07	Tumor	Yes	No	FEMALE	WHITE	38	Pre (<6 months since LMP AND no prior bilateral ovariectomy AND not on estrogen replacement)	Left Upper Outer Quadrant	Core needle biopsy	Infiltrating Ductal Carcinoma	No	Other	Not Available	Not Available	16	1	N1b	T2	Stage IIA	M0		Not Available				TNBC	Negative	Not Available	Negative	Not Available	Negative	Not Available	Not Available	Dead	WITH TUMOR	1	1694	1	1694
TCGA-BH-A1EW-11B-33R-A137-07	Normal	Yes	No	FEMALE	WHITE	38	Pre (<6 months since LMP AND no prior bilateral ovariectomy AND not on estrogen replacement)	Left Upper Outer Quadrant	Core needle biopsy	Infiltrating Ductal Carcinoma	No	Other	Not Available	Not Available	16	1	N1b	T2	Stage IIA	M0		Not Available				TNBC	Negative	Not Available	Negative	Not Available	Negative	Not Available	Not Available	Dead	WITH TUMOR	1	1694	1	1694
TCGA-BH-A1EX-01A-11R-A13Q-07	Tumor	Yes	No	FEMALE	WHITE	67	Post (prior bilateral ovariectomy OR >12 mo since LMP with no prior hysterectomy)	Right Lower Inner Quadrant	Core needle biopsy	Infiltrating Ductal Carcinoma	No	Other	Not Available	Not Available	24	2	N1b	T2	Stage IIB	M0		Not Available				Her-2	Positive	Not Available	Positive	Not Available	Positive	Not Available	Not Available	Dead	WITH TUMOR	1	1508	1	1508
TCGA-BH-A1EY-01A-11R-A13Q-07	Tumor	Yes	No	FEMALE	WHITE	79	Post (prior bilateral ovariectomy OR >12 mo since LMP with no prior hysterectomy)	Left Upper Outer Quadrant	Core needle biopsy	Infiltrating Ductal Carcinoma	No	Modified Radical Mastectomy	Not Available	Not Available	12	0	N0	T2	Stage IIA	M0	NO	Not Available					Positive	Not Available	Positive	Not Available	Negative	Not Available	Not Available	Dead	WITH TUMOR	1	538	1	396	396	1	Distant Metastasis	Lung
TCGA-BH-A1F0-01A-11R-A137-07	Tumor	Yes	No	FEMALE	WHITE	80	Post (prior bilateral ovariectomy OR >12 mo since LMP with no prior hysterectomy)	Left	Fine needle aspiration biopsy	Infiltrating Ductal Carcinoma	No	Modified Radical Mastectomy	Not Available	Not Available	9	1	N1c	T1a	Stage IIA	M0		Not Available				TNBC	Negative	Not Available	Negative	Not Available	Negative	Not Available	Not Available	Dead	WITH TUMOR	1	785	1	785
TCGA-BH-A1F0-11B-23R-A137-07	Normal	Yes	No	FEMALE	WHITE	80	Post (prior bilateral ovariectomy OR >12 mo since LMP with no prior hysterectomy)	Left	Fine needle aspiration biopsy	Infiltrating Ductal Carcinoma	No	Modified Radical Mastectomy	Not Available	Not Available	9	1	N1c	T1a	Stage IIA	M0		Not Available				TNBC	Negative	Not Available	Negative	Not Available	Negative	Not Available	Not Available	Dead	WITH TUMOR	1	785	1	785
TCGA-BH-A1F2-01A-31R-A13Q-07	Tumor	Yes	No	FEMALE	WHITE	53	Peri (6-12 months since last menstrual period)	Left	Core needle biopsy	Infiltrating Ductal Carcinoma	No	Modified Radical Mastectomy	Not Available	Not Available	19	6	N1b	T4b	Stage IIIB	M0		Not Available				Her-2	Positive	Not Available	Positive	Not Available	Positive	Not Available	Not Available	Dead	TUMOR FREE	1	959	0	959
TCGA-BH-A1F2-11A-32R-A13Q-07	Normal	Yes	No	FEMALE	WHITE	53	Not Available	Left	Core needle biopsy	Infiltrating Ductal Carcinoma	No	Modified Radical Mastectomy	Not Available	Not Available	19	6	N1b	T4b	Stage IIIB	M0		Not Available				Her-2	Positive	Not Available	Positive	Not Available	Positive	Not Available	Not Available	Dead	TUMOR FREE	1	959	0	959
TCGA-BH-A1F5-01A-12R-A13Q-07	Tumor	Yes	No	FEMALE	WHITE	62	Post	Right	Core needle biopsy	Infiltrating Ductal Carcinoma	No	Not Available	Not Available	Not Available	4	1	N1a	T1c	Stage IIA	M0		Not Available					Positive	Not Available	Positive	Not Available	Negative	Not Available	Not Available	Dead	TUMOR FREE	1	2712	0	2712
TCGA-BH-A1F6-01A-11R-A13Q-07	Tumor	Yes	No	FEMALE	WHITE	51	Not Available	Left	Core needle biopsy	Infiltrating Ductal Carcinoma	No	Modified Radical Mastectomy	Not Available	Not Available	6	6	N2a	T4d	Not Available	MX		Not Available				TNBC	Negative	Not Available	Negative	Not Available	Negative	Not Available	Not Available	Dead		1	2965	0	2965
TCGA-BH-A1F6-11B-94R-A13Q-07	Normal	Yes	No	FEMALE	WHITE	51	Not Available	Left	Core needle biopsy	Infiltrating Ductal Carcinoma	No	Modified Radical Mastectomy	Not Available	Not Available	6	6	N2a	T4d	Not Available	MX		Not Available				TNBC	Negative	Not Available	Negative	Not Available	Negative	Not Available	Not Available	Dead		1	2965	0	2965
TCGA-BH-A1F8-01A-11R-A13Q-07	Tumor	Yes	No	FEMALE	WHITE	90	Post (prior bilateral ovariectomy OR >12 mo since LMP with no prior hysterectomy)	Left	Core needle biopsy	Infiltrating Ductal Carcinoma	No	Modified Radical Mastectomy	Not Available	Not Available	13	12	N2	T4b	Stage IIIB	M0		Not Available				Her-2	Positive	Not Available	Positive	Not Available	Positive	Not Available	Not Available	Dead	WITH TUMOR	1	763	1	763
TCGA-BH-A1F8-11B-21R-A13Q-07	Normal	Yes	No	FEMALE	WHITE	90	Post (prior bilateral ovariectomy OR >12 mo since LMP with no prior hysterectomy)	Left	Core needle biopsy	Infiltrating Ductal Carcinoma	No	Modified Radical Mastectomy	Not Available	Not Available	13	12	N2	T4b	Stage IIIB	M0		Not Available				Her-2	Positive	Not Available	Positive	Not Available	Positive	Not Available	Not Available	Dead	WITH TUMOR	1	763	1	763
TCGA-BH-A1FB-01A-11R-A13Q-07	Tumor	Yes	No	FEMALE	WHITE	60	Post (prior bilateral ovariectomy OR >12 mo since LMP with no prior hysterectomy)	Right	Core needle biopsy	Infiltrating Ductal Carcinoma	No	Not Available	Not Available	Not Available	15	0	N1b	T2	Stage IIB	M0		Not Available					Positive	Not Available	Positive	Not Available	Negative	Not Available	Not Available	Dead	WITH TUMOR	1	3669	1	3669
TCGA-BH-A1FB-11A-33R-A13Q-07	Normal	Yes	No	FEMALE	WHITE	60	Post (prior bilateral ovariectomy OR >12 mo since LMP with no prior hysterectomy)	Right	Core needle biopsy	Infiltrating Ductal Carcinoma	No	Not Available	Not Available	Not Available	15	0	N1b	T2	Stage IIB	M0		Not Available					Positive	Not Available	Positive	Not Available	Negative	Not Available	Not Available	Dead	WITH TUMOR	1	3669	1	3669
TCGA-BH-A1FC-01A-11R-A13Q-07	Tumor	Yes	No	FEMALE	BLACK OR AFRICAN AMERICAN	78	Post (prior bilateral ovariectomy OR >12 mo since LMP with no prior hysterectomy)	Right Upper Outer Quadrant	Fine needle aspiration biopsy	Medullary Carcinoma	No	Other	Not Available	Not Available	23	1	N1b	T1c	Stage IIA	M0		Not Available				TNBC	Negative	Not Available	Negative	Not Available	Negative	Not Available	Not Available	Dead	TUMOR FREE	1	3472	0	3472
TCGA-BH-A1FC-11A-32R-A13Q-07	Normal	Yes	No	FEMALE	BLACK OR AFRICAN AMERICAN	78	Post (prior bilateral ovariectomy OR >12 mo since LMP with no prior hysterectomy)	Right Upper Outer Quadrant	Fine needle aspiration biopsy	Medullary Carcinoma	No	Other	Not Available	Not Available	23	1	N1b	T1c	Stage IIA	M0		Not Available				TNBC	Negative	Not Available	Negative	Not Available	Negative	Not Available	Not Available	Dead	TUMOR FREE	1	3472	0	3472
TCGA-BH-A1FD-01A-11R-A13Q-07	Tumor	Yes	No	FEMALE	WHITE	68	Post (prior bilateral ovariectomy OR >12 mo since LMP with no prior hysterectomy)	Left	Core needle biopsy	Infiltrating Ductal Carcinoma	No	Not Available	Not Available	Not Available	19	0	N0	T1c	Stage I	M0		Not Available					Positive	Not Available	Positive	Not Available	Negative	Not Available	Not Available	Dead	WITH TUMOR	1	1009	1	1009
TCGA-BH-A1FD-11B-21R-A13Q-07	Normal	Yes	No	FEMALE	WHITE	68	Post (prior bilateral ovariectomy OR >12 mo since LMP with no prior hysterectomy)	Left	Core needle biopsy	Infiltrating Ductal Carcinoma	No	Not Available	Not Available	Not Available	19	0	N0	T1c	Stage I	M0		Not Available					Positive	Not Available	Positive	Not Available	Negative	Not Available	Not Available	Dead	WITH TUMOR	1	1009	1	1009
TCGA-BH-A1FE-01A-11R-A13Q-07	Tumor	Yes	No	FEMALE	WHITE	31	Pre	Left	Core needle biopsy	Infiltrating Ductal Carcinoma	No	Modified Radical Mastectomy	Not Available	Not Available	12	1	N1	T2	Stage IIB	M0		Not Available					Positive	Not Available	Positive	Not Available	Negative	Not Available	Not Available	Dead	WITH TUMOR	1	2273	1	2273
TCGA-BH-A1FE-06A-11R-A213-07	Tumor	Yes	Yes	FEMALE	WHITE	31	Pre	Left	Core needle biopsy	Infiltrating Ductal Carcinoma	No	Modified Radical Mastectomy	Not Available	Not Available	12	1	N1	T2	Stage IIB	M0		Not Available					Positive	Not Available	Positive	Not Available	Negative	Not Available	Not Available	Dead	WITH TUMOR	1	2273	1	2273
TCGA-BH-A1FE-11B-14R-A13Q-07	Normal	Yes	No	FEMALE	WHITE	31	Pre	Left	Core needle biopsy	Infiltrating Ductal Carcinoma	No	Modified Radical Mastectomy	Not Available	Not Available	12	1	N1	T2	Stage IIB	M0		Not Available					Positive	Not Available	Positive	Not Available	Negative	Not Available	Not Available	Dead	WITH TUMOR	1	2273	1	2273
TCGA-BH-A1FG-01A-11R-A13Q-07	Tumor	Yes	No	FEMALE	WHITE	88	Post (prior bilateral ovariectomy OR >12 mo since LMP with no prior hysterectomy)	Left	Excisional Biopsy	Infiltrating Ductal Carcinoma	No	Other	Not Available	Not Available	Not Available	Not Available	NX	T1c	Stage I	M0		Not Available					Positive	Not Available	Positive	Not Available	Negative	Not Available	Not Available	Dead		1	3736	0	3736
TCGA-BH-A1FG-11B-12R-A13Q-07	Normal	Yes	No	FEMALE	WHITE	88	Post (prior bilateral ovariectomy OR >12 mo since LMP with no prior hysterectomy)	Left	Excisional Biopsy	Infiltrating Ductal Carcinoma	No	Other	Not Available	Not Available	Not Available	Not Available	NX	T1c	Stage I	M0		Not Available					Positive	Not Available	Positive	Not Available	Negative	Not Available	Not Available	Dead		1	3736	0	3736
TCGA-BH-A1FH-01A-12R-A13Q-07	Tumor	Yes	No	FEMALE	WHITE	47	Pre	Left Upper Outer Quadrant	Core needle biopsy	Infiltrating Ductal Carcinoma	No	Modified Radical Mastectomy	Not Available	Not Available	13	8	N1b	T2	Stage IV	M1		Not Available					Positive	Not Available	Negative	Not Available	Negative	Not Available	Not Available	Dead	WITH TUMOR	1	1034	1	1034
TCGA-BH-A1FH-11B-42R-A13Q-07	Normal	Yes	No	FEMALE	WHITE	47	Pre	Left Upper Outer Quadrant	Core needle biopsy	Infiltrating Ductal Carcinoma	No	Modified Radical Mastectomy	Not Available	Not Available	13	8	N1b	T2	Stage IV	M1		Not Available					Positive	Not Available	Negative	Not Available	Negative	Not Available	Not Available	Dead	WITH TUMOR	1	1034	1	1034
TCGA-BH-A1FJ-01A-11R-A13Q-07	Tumor	Yes	No	FEMALE	WHITE	66	Post	Right Upper Outer Quadrant	Core needle biopsy	Infiltrating Ductal Carcinoma	No	Modified Radical Mastectomy	Not Available	Not Available	35	6	N1b	T3	Stage IIIA	M0		Not Available					Negative	Not Available	Positive	Not Available	Negative	Not Available	Not Available	Dead		1	1927	0	1927
TCGA-BH-A1FJ-11B-42R-A13Q-07	Normal	Yes	No	FEMALE	WHITE	66	Post	Right Upper Outer Quadrant	Core needle biopsy	Infiltrating Ductal Carcinoma	No	Modified Radical Mastectomy	Not Available	Not Available	35	6	N1b	T3	Stage IIIA	M0		Not Available					Negative	Not Available	Positive	Not Available	Negative	Not Available	Not Available	Dead		1	1927	0	1927
TCGA-BH-A1FL-01A-11R-A13Q-07	Tumor	Yes	No	FEMALE	WHITE	69	Post	Left Upper Outer Quadrant	Fine needle aspiration biopsy	Infiltrating Ductal Carcinoma	No	Other	Not Available	Not Available	22	4	N1b	T2	Stage IIB	M0		Not Available					Positive	Not Available	Positive	Not Available	Negative	Not Available	Not Available	Dead	WITH TUMOR	1	1673	1	1673
TCGA-BH-A1FM-01A-11R-A13Q-07	Tumor	Yes	No	FEMALE	WHITE	44	Pre	Right Upper Outer Quadrant	Core needle biopsy	Infiltrating Ductal Carcinoma	No	Modified Radical Mastectomy	Not Available	Not Available	10	8	N2	T2	Stage IIIA	M0		Not Available					Positive	Not Available	Negative	Not Available	Negative	Not Available	Not Available	Dead		1	1388	0	1388
TCGA-BH-A1FM-11B-23R-A13Q-07	Normal	Yes	No	FEMALE	WHITE	44	Pre	Right Upper Outer Quadrant	Core needle biopsy	Infiltrating Ductal Carcinoma	No	Modified Radical Mastectomy	Not Available	Not Available	10	8	N2	T2	Stage IIIA	M0		Not Available					Positive	Not Available	Negative	Not Available	Negative	Not Available	Not Available	Dead		1	1388	0	1388
TCGA-BH-A1FN-01A-11R-A13Q-07	Tumor	Yes	No	FEMALE	WHITE	34	Pre	Right Upper Outer Quadrant	Fine needle aspiration biopsy	Infiltrating Ductal Carcinoma	No	Other	Not Available	Not Available	29	0	N0	T2	Stage IIA	M0		Not Available					Positive	Not Available	Positive	Not Available	Negative	Not Available	Not Available	Dead	WITH TUMOR	1	2192	1	2192
TCGA-BH-A1FN-11A-34R-A13Q-07	Normal	Yes	No	FEMALE	WHITE	34	Pre	Right Upper Outer Quadrant	Fine needle aspiration biopsy	Infiltrating Ductal Carcinoma	No	Other	Not Available	Not Available	29	0	N0	T2	Stage IIA	M0		Not Available					Positive	Not Available	Positive	Not Available	Negative	Not Available	Not Available	Dead	WITH TUMOR	1	2192	1	2192
TCGA-BH-A1FR-01A-11R-A13Q-07	Tumor	Yes	No	FEMALE	WHITE	73	Post	Right Upper Inner Quadrant	Core needle biopsy	Other, specify	No	Other	Not Available	Not Available	10	4	N1a	T4b	Stage IIIB	M0		Not Available					Positive	Not Available	Positive	Not Available	Negative	Not Available	Not Available	Dead	WITH TUMOR	1	1642	1	1642
TCGA-BH-A1FR-11B-42R-A13Q-07	Normal	Yes	No	FEMALE	WHITE	73	Post	Right Upper Inner Quadrant	Core needle biopsy	Other, specify	No	Other	Not Available	Not Available	10	4	N1a	T4b	Stage IIIB	M0		Not Available					Positive	Not Available	Positive	Not Available	Negative	Not Available	Not Available	Dead	WITH TUMOR	1	1642	1	1642
TCGA-BH-A1FU-01A-11R-A14D-07	Tumor	Yes	No	FEMALE	WHITE	44	Pre	Right Upper Outer Quadrant	Fine needle aspiration biopsy	Infiltrating Ductal Carcinoma	No	Modified Radical Mastectomy	Not Available	Not Available	5	0	N0	T1c	Stage IA	M0		Not Available				TNBC	Negative	Not Available	Negative	Not Available	Negative	Not Available	Not Available	Dead	WITH TUMOR	1	1688	1	1688
TCGA-BH-A1FU-11A-23R-A14D-07	Normal	Yes	No	FEMALE	WHITE	44	Pre	Right Upper Outer Quadrant	Fine needle aspiration biopsy	Infiltrating Ductal Carcinoma	No	Modified Radical Mastectomy	Not Available	Not Available	5	0	N0	T1c	Stage IA	M0		Not Available				TNBC	Negative	Not Available	Negative	Not Available	Negative	Not Available	Not Available	Dead	WITH TUMOR	1	1688	1	1688
TCGA-BH-A201-01A-11R-A14M-07	Tumor	Yes	No	FEMALE	WHITE	64	Post (prior bilateral ovariectomy OR >12 mo since LMP with no prior hysterectomy)	Left	Core needle biopsy	Infiltrating Ductal Carcinoma	No	Other	Not Available	Not Available	2	0	N0	T1	Stage IA	M0	YES	Not Available					Positive	Not Available	Positive	Not Available	Negative	Not Available	Not Available	Alive	TUMOR FREE	0	856	0	856
TCGA-BH-A202-01A-11R-A14M-07	Tumor	Yes	No	FEMALE	WHITE	60	Post (prior bilateral ovariectomy OR >12 mo since LMP with no prior hysterectomy)	Left	Core needle biopsy	Infiltrating Ductal Carcinoma	No	Other	Not Available	Not Available	4	0	N0	T2	Stage II	M0	YES	Not Available	Carboplatin;Taxotere	Complete Response;Complete Response	Not Available;Not Available	Her-2	Positive	Not Available	Positive	Not Available	Positive	Not Available	Not Available	Alive	TUMOR FREE	0	795	0	795
TCGA-BH-A203-01A-12R-A169-07	Tumor	Yes	No	FEMALE	WHITE	78	Post (prior bilateral ovariectomy OR >12 mo since LMP with no prior hysterectomy)	Right	Not Available	Infiltrating Ductal Carcinoma	No	Lumpectomy	Not Available	Not Available	39	35	N1b	T2	Stage IIB	M0		Not Available				TNBC	Negative	Not Available	Negative	Not Available	Negative	Not Available	Not Available	Dead	WITH TUMOR	1	1174	1	1174
TCGA-BH-A203-11A-42R-A169-07	Normal	Yes	No	FEMALE	WHITE	78	Post (prior bilateral ovariectomy OR >12 mo since LMP with no prior hysterectomy)	Right	Not Available	Infiltrating Ductal Carcinoma	No	Lumpectomy	Not Available	Not Available	39	35	N1b	T2	Stage IIB	M0		Not Available				TNBC	Negative	Not Available	Negative	Not Available	Negative	Not Available	Not Available	Dead	WITH TUMOR	1	1174	1	1174
TCGA-BH-A204-01A-11R-A157-07	Tumor	Yes	No	FEMALE	WHITE	80	Post (prior bilateral ovariectomy OR >12 mo since LMP with no prior hysterectomy)	Left	Fine needle aspiration biopsy	Infiltrating Ductal Carcinoma	No	Modified Radical Mastectomy	Not Available	Not Available	16	2	N1b	T2	Stage IIB	M0		Not Available				TNBC	Negative	Not Available	Negative	Not Available	Negative	Not Available	Not Available	Dead		1	2534	0	2534
TCGA-BH-A204-11A-53R-A157-07	Normal	Yes	No	FEMALE	WHITE	80	Post (prior bilateral ovariectomy OR >12 mo since LMP with no prior hysterectomy)	Left	Fine needle aspiration biopsy	Infiltrating Ductal Carcinoma	No	Modified Radical Mastectomy	Not Available	Not Available	16	2	N1b	T2	Stage IIB	M0		Not Available				TNBC	Negative	Not Available	Negative	Not Available	Negative	Not Available	Not Available	Dead		1	2534	0	2534
TCGA-BH-A208-01A-11R-A157-07	Tumor	Yes	No	FEMALE	WHITE	48	Pre	Left	Core needle biopsy	Infiltrating Ductal Carcinoma	No	Lumpectomy	Not Available	Not Available	15	3	N1b	T2	Stage IIB	M0		Not Available				TNBC	Negative	Not Available	Negative	Not Available	Negative	Not Available	Not Available	Dead	TUMOR FREE	1	1759	0	1759
TCGA-BH-A208-11A-51R-A157-07	Normal	Yes	No	FEMALE	WHITE	48	Pre	Left	Core needle biopsy	Infiltrating Ductal Carcinoma	No	Lumpectomy	Not Available	Not Available	15	3	N1b	T2	Stage IIB	M0		Not Available				TNBC	Negative	Not Available	Negative	Not Available	Negative	Not Available	Not Available	Dead	TUMOR FREE	1	1759	0	1759
TCGA-BH-A209-01A-11R-A157-07	Tumor	Yes	No	FEMALE	BLACK OR AFRICAN AMERICAN	77	Post (prior bilateral ovariectomy OR >12 mo since LMP with no prior hysterectomy)	Left Upper Outer Quadrant	Fine needle aspiration biopsy	Medullary Carcinoma	No	Lumpectomy	Not Available	Not Available	12	0	N0	T1c	Stage I	M0		Not Available					Positive	Not Available	Positive	Not Available	Negative	Not Available	Not Available	Dead	TUMOR FREE	1	3959	0	3959
TCGA-BH-A209-11A-42R-A157-07	Normal	Yes	No	FEMALE	BLACK OR AFRICAN AMERICAN	77	Post (prior bilateral ovariectomy OR >12 mo since LMP with no prior hysterectomy)	Left Upper Outer Quadrant	Fine needle aspiration biopsy	Medullary Carcinoma	No	Lumpectomy	Not Available	Not Available	12	0	N0	T1c	Stage I	M0		Not Available					Positive	Not Available	Positive	Not Available	Negative	Not Available	Not Available	Dead	TUMOR FREE	1	3959	0	3959
TCGA-BH-A28O-01A-11R-A22K-07	Tumor	Yes	No	FEMALE	WHITE	50	Not Available	Right Lower Outer Quadrant	Fine needle aspiration biopsy	Infiltrating Lobular Carcinoma	No	Other	Sentinel node biopsy alone	Negative	14	14	N3	T3a	Stage IIIC	M0	YES	Not Available	Cytoxan;Doxorubicin	Complete Response;Complete Response	Not Available;Not Available		Positive	Not Available	Positive	Not Available	Negative	Not Available	Not Available	Alive	TUMOR FREE	0	1120	0	1120
TCGA-BH-A28Q-01A-11R-A16F-07	Tumor	Yes	No	FEMALE	WHITE	46	Pre (<6 months since LMP AND no prior bilateral ovariectomy AND not on estrogen replacement)	Right	Fine needle aspiration biopsy	Infiltrating Lobular Carcinoma	No	Modified Radical Mastectomy	Not Available	Not Available	18	2	N1a	T2	Stage IIB	M0	NO	Not Available					Positive	Not Available	Positive	Not Available	Negative	Not Available	Not Available	Alive	TUMOR FREE	0	1119	0	1119
TCGA-BH-A2L8-01A-11R-A18M-07	Tumor	Yes	No	FEMALE	WHITE	45	Pre (<6 months since LMP AND no prior bilateral ovariectomy AND not on estrogen replacement)	Right Upper Outer Quadrant	Core needle biopsy	Infiltrating Lobular Carcinoma	No	Other	Sentinel node biopsy alone	Negative	1	0	N0 (i-)	T2	Stage IIA	M0	NO	Not Available	Cytoxan	Complete Response	Not Available		Positive	70-79%	Positive	80-89%	Negative	Not Available	Not Available	Alive	TUMOR FREE	0	612	0	612
TCGA-BH-A42T-01A-11R-A24H-07	Tumor	Yes	No	FEMALE	BLACK OR AFRICAN AMERICAN	75	Post (prior bilateral ovariectomy OR >12 mo since LMP with no prior hysterectomy)	Left	Core needle biopsy	Infiltrating Lobular Carcinoma	No	Simple Mastectomy	Sentinel node biopsy alone	Negative	2	1	N0 (i+)	T2	Stage IIA	M0	NO	NO				Her-2	Positive	Not Available	Positive	Not Available	Positive	2+	Not Available	Alive	TUMOR FREE	1	320	0	320
TCGA-BH-A42U-01A-12R-A24H-07	Tumor	Yes	No	FEMALE	BLACK OR AFRICAN AMERICAN	80	Post (prior bilateral ovariectomy OR >12 mo since LMP with no prior hysterectomy)	Right	Core needle biopsy	Infiltrating Lobular Carcinoma	No	Simple Mastectomy	Not Available	Negative	1	Not Available	N0	T2	Stage IIA	M0	NO	NO				TNBC	Negative	Not Available	Negative	Not Available	Negative	Not Available	Not Available	Alive	TUMOR FREE	0	3364	0	3364
TCGA-BH-A42V-01A-11R-A24H-07	Tumor	Yes	No	FEMALE	BLACK OR AFRICAN AMERICAN	41	Pre (<6 months since LMP AND no prior bilateral ovariectomy AND not on estrogen replacement)	Left Lower Outer Quadrant	Core needle biopsy	Infiltrating Ductal Carcinoma	No	Modified Radical Mastectomy	Sentinel node biopsy alone	Positive	3	1	N1mi	T1c	Stage IB	M0	YES	NO					Positive	Not Available	Positive	Not Available	Negative	Not Available	Not Available	Alive	TUMOR FREE	0	635	0	635
TCGA-BH-A5IZ-01A-11R-A27Q-07	Tumor	Yes	No	FEMALE	BLACK OR AFRICAN AMERICAN	51	Post (prior bilateral ovariectomy OR >12 mo since LMP with no prior hysterectomy)	Left	Core needle biopsy	Infiltrating Ductal Carcinoma	No	Lumpectomy	Not Available	Negative	6	1	N1a	T2	Stage IIB	cM0 (i+)	YES	YES	Adriamycin;Taxotere;Cyclophosphamide	Complete Response;Complete Response;Complete Response	Not Available;Not Available;Not Available		Positive	Not Available	Negative	Not Available	Negative	Not Available	Not Available	Alive	TUMOR FREE	0	567	0	567
TCGA-BH-A5J0-01A-11R-A27Q-07	Tumor	Yes	No	FEMALE	BLACK OR AFRICAN AMERICAN	63	Post (prior bilateral ovariectomy OR >12 mo since LMP with no prior hysterectomy)	Left	Core needle biopsy	Infiltrating Ductal Carcinoma	No	Simple Mastectomy	Not Available	Negative	5	0	N0	T1c	Stage IA	M0	NO	NO					Positive	Not Available	Positive	Not Available	Negative	Not Available	Not Available	Alive	TUMOR FREE	0	715	0	715
TCGA-BH-A6R8-01A-21R-A33J-07	Tumor	Yes	No	FEMALE	BLACK OR AFRICAN AMERICAN	46	Pre	Left	Core needle biopsy	Infiltrating Ductal Carcinoma	No	Lumpectomy	Not Available	Negative	4	0	N0	T2	Stage IIA	M0	YES	YES					Positive	Not Available	Positive	Not Available	Negative	Not Available	Not Available	Alive	TUMOR FREE	0	293	0	293
TCGA-BH-A6R9-01A-21R-A32P-07	Tumor	Yes	No	FEMALE	WHITE	61	Post (prior bilateral ovariectomy OR >12 mo since LMP with no prior hysterectomy)	Left	Core needle biopsy	Metaplastic Carcinoma	No	Modified Radical Mastectomy	Not Available	Negative	Not Available	Not Available	N0	T2	Stage IIA	M0	NO	NO					Negative	Not Available	Positive	Not Available	Negative	Not Available	Not Available	Alive	TUMOR FREE	0	160	0	160
TCGA-BH-A8FY-01A-11R-A36F-07	Tumor	Yes	No	FEMALE	WHITE	87	Post (prior bilateral ovariectomy OR >12 mo since LMP with no prior hysterectomy)	Left;Left Upper Outer Quadrant;Left Lower Outer Quadrant	Not Available	Infiltrating Lobular Carcinoma	No	Simple Mastectomy	Not Available	Negative	2	0	N0 (i+)	T1c	Stage IA	M0		NO					Positive	Not Available	Positive	Not Available	Negative	Not Available	Not Available	Dead	TUMOR FREE	1	295	0	295
TCGA-BH-A8FZ-01A-11R-A352-07	Tumor	Yes	No	FEMALE	WHITE	58	Post (prior bilateral ovariectomy OR >12 mo since LMP with no prior hysterectomy)	Left	Core needle biopsy	Infiltrating Lobular Carcinoma	No	Simple Mastectomy	Not Available	Negative	7	0	N0	T1b	Stage IA	M0	YES	YES					Positive	Not Available	Positive	Not Available	Negative	Not Available	Not Available	Alive	TUMOR FREE	0	574	0	574
TCGA-BH-A8G0-01A-11R-A352-07	Tumor	Yes	No	FEMALE	WHITE	54	Peri (6-12 months since last menstrual period)	Left	Core needle biopsy	Infiltrating Lobular Carcinoma	No	Simple Mastectomy	Not Available	Negative	3	3	N1a	T2	Stage IIB	M0	NO	NO	Taxotere;Cytoxan	Complete Response;Complete Response	Not Available;Not Available		Positive	Not Available	Positive	Not Available	Negative	Not Available	Not Available	Alive	TUMOR FREE	0	662	0	662
TCGA-BH-AB28-01A-31R-A41B-07	Tumor	Yes	No	FEMALE	WHITE	53	Unknown	Left	Core needle biopsy	Infiltrating Lobular Carcinoma	No	Modified Radical Mastectomy	Not Available	Negative	20	3	N1a	T3	Stage IIIA	M0	NO	NO	Taxotere;Cytoxan	Not Applicable;Not Applicable	Not Available;Not Available		Positive	Not Available	Positive	Not Available	Negative	Not Available	Not Available	Alive	TUMOR FREE	0	287	0	287
TCGA-C8-A12K-01A-21R-A115-07	Tumor	Yes	No	FEMALE	ASIAN	80	Post (prior bilateral ovariectomy OR >12 mo since LMP with no prior hysterectomy)	Right Upper Inner Quadrant	Other method, specify:	Infiltrating Ductal Carcinoma	No	Other	Other (specify)	Negative	7	1	N1	T2	Stage IIB	M0		Not Available				TNBC	Negative	Not Available	Negative	Not Available	Negative	Not Available	Not Available	Alive	TUMOR FREE	0	0	0	0
TCGA-C8-A12L-01A-11R-A115-07	Tumor	Yes	No	FEMALE	ASIAN	67	Post (prior bilateral ovariectomy OR >12 mo since LMP with no prior hysterectomy)	Right	Other method, specify:	Infiltrating Ductal Carcinoma	No	Other	Axillary lymph node dissection alone	Negative	3	Not Available	N0 (i-)	T2	Stage IIA	M0	NO	Not Available				TNBC	Negative	Not Available	Negative	Not Available	Negative	2+	Not Available	Alive	TUMOR FREE	0	363	0	363
TCGA-C8-A12M-01A-11R-A115-07	Tumor	Yes	No	FEMALE	ASIAN	70	Post (prior bilateral ovariectomy OR >12 mo since LMP with no prior hysterectomy)	Left	Other method, specify:	Infiltrating Ductal Carcinoma	No	Other	Axillary lymph node dissection alone	Negative	10	Not Available	N0 (i-)	T2	Stage IIA	M0	NO	Not Available					Positive	Not Available	Negative	Not Available	Negative	Not Available	Not Available	Alive	TUMOR FREE	0	358	0	358
TCGA-C8-A12N-01A-11R-A115-07	Tumor	Yes	No	FEMALE	ASIAN	58	Post (prior bilateral ovariectomy OR >12 mo since LMP with no prior hysterectomy)	Right	Other method, specify:	Infiltrating Ductal Carcinoma	No	Other	Axillary lymph node dissection alone	Negative	10	Not Available	N0 (i-)	T2	Stage IIA	M0	NO	Not Available					Positive	Not Available	Positive	Not Available	Negative	Not Available	Not Available	Alive	TUMOR FREE	0	358	0	358
TCGA-C8-A12O-01A-11R-A115-07	Tumor	Yes	No	FEMALE	ASIAN	50	Pre (<6 months since LMP AND no prior bilateral ovariectomy AND not on estrogen replacement)	Left	Other method, specify:	Infiltrating Ductal Carcinoma	No	Other	Axillary lymph node dissection alone	Negative	10	Not Available	N0 (i-)	T2	Stage IIA	M0	NO	Not Available					Positive	Not Available	Positive	Not Available	Negative	Not Available	Not Available	Alive	TUMOR FREE	0	385	0	385
TCGA-C8-A12P-01A-11R-A115-07	Tumor	Yes	No	FEMALE	ASIAN	55	Post (prior bilateral ovariectomy OR >12 mo since LMP with no prior hysterectomy)	Left	Other method, specify:	Infiltrating Ductal Carcinoma	No	Other	Not Available	Negative	8	Not Available	N1	T2	Stage IIB	M0	NO	Not Available				Her-2	Negative	Not Available	Negative	Not Available	Positive	3+	Not Available	Alive	TUMOR FREE	0	358	0	358
TCGA-C8-A12Q-01A-11R-A115-07	Tumor	Yes	No	FEMALE	ASIAN	78	Post (prior bilateral ovariectomy OR >12 mo since LMP with no prior hysterectomy)	Left	Other method, specify:	Infiltrating Ductal Carcinoma	No	Other	Axillary lymph node dissection alone	Negative	7	Not Available	N2	T1	Stage IIIA	M0	NO	Not Available				Her-2	Negative	Not Available	Negative	Not Available	Positive	3+	Not Available	Alive	WITH TUMOR	1	385	1	385			Distant Metastasis	Liver
TCGA-C8-A12T-01A-11R-A115-07	Tumor	Yes	No	FEMALE	ASIAN	43	Pre (<6 months since LMP AND no prior bilateral ovariectomy AND not on estrogen replacement)	Left	Other method, specify:	Infiltrating Ductal Carcinoma	No	Other	Axillary lymph node dissection alone	Negative	5	0	N0	T2	Stage IIA	M0		Not Available				Her-2	Positive	Not Available	Positive	Not Available	Positive	3+	Not Available	Alive	TUMOR FREE	0	0	0	0
TCGA-C8-A12U-01A-11R-A115-07	Tumor	Yes	No	FEMALE	ASIAN	46	Pre (<6 months since LMP AND no prior bilateral ovariectomy AND not on estrogen replacement)	Right	Other method, specify:	Infiltrating Ductal Carcinoma	No	Other	Axillary lymph node dissection alone	Negative	7	Not Available	N1	T2	Stage IIB	M0	NO	Not Available					Positive	Not Available	Positive	Not Available	Negative	1+	Not Available	Alive	TUMOR FREE	0	385	0	385
TCGA-C8-A12V-01A-11R-A115-07	Tumor	Yes	No	FEMALE	ASIAN	55	Post (prior bilateral ovariectomy OR >12 mo since LMP with no prior hysterectomy)	Right	Other method, specify:	Infiltrating Ductal Carcinoma	No	Other	Axillary lymph node dissection alone	Not Available	5	0	N0	T2	Stage IIA	M0	NO	Not Available				TNBC	Negative	Not Available	Negative	Not Available	Negative	Not Available	Not Available	Alive	TUMOR FREE	0	385	0	385
TCGA-C8-A12W-01A-11R-A115-07	Tumor	Yes	No	FEMALE	ASIAN	49	Pre (<6 months since LMP AND no prior bilateral ovariectomy AND not on estrogen replacement)	Left	Other method, specify:	Infiltrating Ductal Carcinoma	No	Other	Axillary lymph node dissection alone	Negative	7	Not Available	N1	T4	Stage IIIB	M0	NO	Not Available					Positive	Not Available	Positive	Not Available	Negative	1+	Not Available	Alive	TUMOR FREE	0	385	0	385
TCGA-C8-A12X-01A-11R-A115-07	Tumor	Yes	No	FEMALE	ASIAN	62	Post (prior bilateral ovariectomy OR >12 mo since LMP with no prior hysterectomy)	Left	Other method, specify:	Mucinous Carcinoma	No	Other	Axillary lymph node dissection alone	Negative	6	Not Available	N1	T2	Stage IIB	M0	NO	Not Available					Positive	Not Available	Positive	Not Available	Negative	1+	Not Available	Alive	TUMOR FREE	0	385	0	385
TCGA-C8-A12Y-01A-11R-A12D-07	Tumor	Yes	No	FEMALE	ASIAN	44	Pre (<6 months since LMP AND no prior bilateral ovariectomy AND not on estrogen replacement)	Left	Other method, specify:	Infiltrating Ductal Carcinoma	No	Other	Axillary lymph node dissection alone	Negative	9	Not Available	N1	T2	Stage IIB	M0	YES	Not Available				TNBC	Negative	Not Available	Negative	Not Available	Negative	Not Available	Not Available	Alive	TUMOR FREE	0	1476	0	1476
TCGA-C8-A12Z-01A-11R-A115-07	Tumor	Yes	No	FEMALE	ASIAN	45	Pre	Right	Core needle biopsy	Infiltrating Ductal Carcinoma	No	Other	Axillary lymph node dissection alone	Negative	2	2	N1	T2	Stage IIB	M0	NO	Not Available	5-Flourouracil;Doxorubicin;Cyclophosphamide	Complete Response;Complete Response;Complete Response	Not Available;Not Available;Not Available	Her-2	Negative	Not Available	Negative	Not Available	Positive	3+	Not Available	Alive	TUMOR FREE	0	382	0	382
TCGA-C8-A130-01A-31R-A115-07	Tumor	Yes	No	FEMALE	ASIAN	52	Peri (6-12 months since last menstrual period)	Left	Core needle biopsy	Infiltrating Ductal Carcinoma	No	Other	Axillary lymph node dissection alone	Negative	8	Not Available	N2	T3	Stage IIIA	M0	NO;NO	Not Available					Positive	Not Available	Positive	Not Available	Negative	2+	Not Available	Alive	TUMOR FREE	0	370	0	370
TCGA-C8-A131-01A-11R-A115-07	Tumor	Yes	No	FEMALE	ASIAN	82	Post (prior bilateral ovariectomy OR >12 mo since LMP with no prior hysterectomy)	Left	Core needle biopsy	Infiltrating Ductal Carcinoma	No	Other	Axillary lymph node dissection alone	Negative	8	4	N2	T2	Stage IIIA	M0	NO;NO	Not Available	5-Flourouracil;Doxorubicin;Cyclophosphamide	Complete Response;Complete Response;Complete Response	Not Available;Not Available;Not Available	TNBC	Negative	Not Available	Negative	Not Available	Negative	1+	Not Available	Alive	TUMOR FREE	0	411	0	411
TCGA-C8-A132-01A-31R-A115-07	Tumor	Yes	No	FEMALE	ASIAN	56	Post (prior bilateral ovariectomy OR >12 mo since LMP with no prior hysterectomy)	Left	Core needle biopsy	Infiltrating Ductal Carcinoma	No	Other	Axillary lymph node dissection alone	Negative	4	1	N1	T2	Stage IIB	M0	NO;NO	Not Available					Positive	Not Available	Positive	Not Available	Negative	Not Available	Not Available	Alive	TUMOR FREE	0	383	0	383
TCGA-C8-A133-01A-32R-A12D-07	Tumor	Yes	No	FEMALE	WHITE	65	Post (prior bilateral ovariectomy OR >12 mo since LMP with no prior hysterectomy)	Right	Other method, specify:	Other, specify	No	Modified Radical Mastectomy	Axillary lymph node dissection alone	Negative	26	Not Available	N1	T3	Stage IIIA	M0		Not Available					Positive	Not Available	Positive	Not Available	Negative	Not Available	Not Available	Alive	TUMOR FREE	0	0	0	0
TCGA-C8-A134-01A-11R-A115-07	Tumor	Yes	No	FEMALE	ASIAN	52	Peri (6-12 months since last menstrual period)	Left	Core needle biopsy	Infiltrating Ductal Carcinoma	No	Other	Axillary lymph node dissection alone	Negative	7	Not Available	N0	T2	Stage IIA	M0	NO;NO	Not Available	5-Flourouracil;Epirubicin;Cyclophosphamide	Complete Response;Complete Response;Complete Response	Not Available;Not Available;Not Available	TNBC	Negative	Not Available	Negative	Not Available	Negative	2+	Not Available	Alive	TUMOR FREE	0	383	0	383
TCGA-C8-A135-01A-11R-A115-07	Tumor	Yes	No	FEMALE	ASIAN	64	Post (prior bilateral ovariectomy OR >12 mo since LMP with no prior hysterectomy)	Left	Core needle biopsy	Infiltrating Ductal Carcinoma	No	Modified Radical Mastectomy	Axillary lymph node dissection alone	Negative	3	1	N1	T2	Stage IIB	M0	NO;NO	Not Available	5-Flourouracil;Doxorubicin;Cyclophosphamide;Taxol	Complete Response;Complete Response;Complete Response;Complete Response	Not Available;Not Available;Not Available;Not Available	Her-2	Negative	Not Available	Negative	Not Available	Positive	3+	Not Available	Alive	TUMOR FREE	0	393	0	393
TCGA-C8-A137-01A-11R-A115-07	Tumor	Yes	No	FEMALE	ASIAN	34	Pre (<6 months since LMP AND no prior bilateral ovariectomy AND not on estrogen replacement)	Left	Core needle biopsy	Infiltrating Ductal Carcinoma	No	Modified Radical Mastectomy	Axillary lymph node dissection alone	Negative	2	Not Available	N1	T2	Stage IIB	M0	NO;NO	Not Available				Her-2	Negative	Not Available	Negative	Not Available	Positive	3+	Not Available	Alive	WITH TUMOR	0	379	1	136	136	1	Locoregional Recurrence
TCGA-C8-A138-01A-11R-A115-07	Tumor	Yes	No	FEMALE	ASIAN	54	Post (prior bilateral ovariectomy OR >12 mo since LMP with no prior hysterectomy)	Left	Core needle biopsy	Infiltrating Ductal Carcinoma	No	Modified Radical Mastectomy	Axillary lymph node dissection alone	Negative	2	Not Available	N2	T2	Stage IIIA	M0	NO;NO	Not Available					Positive	Not Available	Negative	Not Available	Negative	2+	Not Available	Alive	TUMOR FREE	0	380	0	380
TCGA-C8-A1HE-01A-11R-A13Q-07	Tumor	Yes	No	FEMALE	ASIAN	59	Post (prior bilateral ovariectomy OR >12 mo since LMP with no prior hysterectomy)	Right	Other method, specify:	Infiltrating Ductal Carcinoma	No	Other	Axillary lymph node dissection alone	Negative	5	Not Available	N0	T2	Stage IIA	M0	NO	Not Available					Positive	Not Available	Positive	Not Available	Negative	2+	Not Available	Alive	TUMOR FREE	0	375	0	375
TCGA-C8-A1HF-01A-11R-A137-07	Tumor	Yes	No	FEMALE	ASIAN	48	Pre (<6 months since LMP AND no prior bilateral ovariectomy AND not on estrogen replacement)	Left	Other method, specify:	Infiltrating Ductal Carcinoma	No	Other	Axillary lymph node dissection alone	Negative	12	Not Available	N0	T2	Stage IIA	M0	NO	Not Available				Her-2	Negative	Not Available	Positive	Not Available	Positive	3+	Not Available	Alive	TUMOR FREE	0	332	0	332
TCGA-C8-A1HG-01A-11R-A137-07	Tumor	Yes	No	FEMALE	ASIAN	50	Pre (<6 months since LMP AND no prior bilateral ovariectomy AND not on estrogen replacement)	Right	Other method, specify:	Infiltrating Ductal Carcinoma	No	Other	Axillary lymph node dissection alone	Negative	Not Available	Not Available	N0	T2	Stage IIA	M0	NO	Not Available					Positive	Not Available	Positive	Not Available	Negative	1+	Not Available	Alive	TUMOR FREE	0	345	0	345
TCGA-C8-A1HI-01A-11R-A137-07	Tumor	No	No	FEMALE	ASIAN	40	Pre (<6 months since LMP AND no prior bilateral ovariectomy AND not on estrogen replacement)	Right	Other method, specify:	Infiltrating Ductal Carcinoma	Yes	Other	Axillary lymph node dissection alone	Negative	6	Not Available	N2	T2	Stage IIIA	M0	NO	Not Available					Positive	Not Available	Positive	Not Available	Negative	1+	Not Available	Alive	TUMOR FREE	0	343	0	343
TCGA-C8-A1HJ-01A-11R-A13Q-07	Tumor	Yes	No	FEMALE	ASIAN	53	Peri (6-12 months since last menstrual period)	Right	Tumor resection	Infiltrating Ductal Carcinoma	No	Other	Axillary lymph node dissection alone	Negative	10	Not Available	N0	T2	Stage IIA	M0		Not Available				TNBC	Negative	Not Available	Negative	Not Available	Negative	Not Available	Not Available	Alive	TUMOR FREE	0	5	0	5
TCGA-C8-A1HK-01A-21R-A13Q-07	Tumor	Yes	No	FEMALE	ASIAN	53	Peri (6-12 months since last menstrual period)	Right	Other method, specify:	Infiltrating Ductal Carcinoma	No	Other	Axillary lymph node dissection alone	Negative	8	Not Available	N1	T2	Stage IIB	M0	NO	Not Available				Her-2	Negative	Not Available	Negative	Not Available	Positive	3+	Not Available	Alive	TUMOR FREE	0	366	0	366
TCGA-C8-A1HL-01A-11R-A137-07	Tumor	Yes	No	FEMALE	ASIAN	38	Pre (<6 months since LMP AND no prior bilateral ovariectomy AND not on estrogen replacement)	Left	Other method, specify:	Other, specify	No	Other	Axillary lymph node dissection alone	Negative	9	Not Available	N1	T3	Stage IIIA	M0	NO	Not Available					Positive	Not Available	Negative	Not Available	Negative	2+	Not Available	Alive	TUMOR FREE	0	317	0	317
TCGA-C8-A1HM-01A-12R-A137-07	Tumor	Yes	No	FEMALE	ASIAN	74	Post (prior bilateral ovariectomy OR >12 mo since LMP with no prior hysterectomy)	Left	Core needle biopsy	Infiltrating Ductal Carcinoma	No	Modified Radical Mastectomy	Axillary lymph node dissection alone	Negative	Not Available	Not Available	N0	T2	Stage IIA	M0	NO;NO	Not Available	Doxorubicin;Cyclophosphamide;Taxol	Complete Response;Complete Response;Complete Response	Not Available;Not Available;Not Available		Positive	Not Available	Positive	Not Available	Negative	1+	Not Available	Alive	TUMOR FREE	0	375	0	375
TCGA-C8-A1HN-01A-11R-A137-07	Tumor	Yes	No	FEMALE	ASIAN	56	Post (prior bilateral ovariectomy OR >12 mo since LMP with no prior hysterectomy)	Left	Core needle biopsy	Infiltrating Ductal Carcinoma	No	Modified Radical Mastectomy	Axillary lymph node dissection alone	Negative	Not Available	Not Available	N0	T2	Stage IIA	M0	NO;NO	Not Available					Positive	Not Available	Positive	Not Available	Negative	2+	Not Available	Alive	TUMOR FREE	0	394	0	394
TCGA-C8-A1HO-01A-11R-A13Q-07	Tumor	Yes	No	FEMALE	ASIAN	34	Pre (<6 months since LMP AND no prior bilateral ovariectomy AND not on estrogen replacement)	Left Upper Inner Quadrant	Tumor resection	Infiltrating Ductal Carcinoma	No	Discrepancy	Not Available	Negative	Not Available	Not Available	N3	T3	Stage IIIC	M0	NO	Not Available	5-Fluorouracil;Epirubicin;Cyclophosphamide	Complete Response;Complete Response;Complete Response	Not Available;Not Available;Not Available		Positive	Not Available	Positive	Not Available	Negative	Not Available	Not Available	Alive	TUMOR FREE	0	375	0	375
TCGA-C8-A26V-01A-11R-A16F-07	Tumor	Yes	No	FEMALE	ASIAN	47	Pre	Right	Other method, specify:	Infiltrating Ductal Carcinoma	No	Modified Radical Mastectomy	Not Available	Negative	Not Available	Not Available	N2	T3	Stage IIIA	M0	YES	Not Available	Tamoxifen	Complete Response	Not Available		Positive	Not Available	Positive	Not Available	Negative	Not Available	Not Available	Alive	TUMOR FREE	0	616	0	616
TCGA-C8-A26W-01A-11R-A16F-07	Tumor	Yes	No	FEMALE	ASIAN	58	Post (prior bilateral ovariectomy OR >12 mo since LMP with no prior hysterectomy)	Left Upper Outer Quadrant	Tumor resection	Infiltrating Ductal Carcinoma	No	Modified Radical Mastectomy	Not Available	Negative	Not Available	Not Available	N1	T2	Stage IIB	M0	NO	Not Available	Doxorubicin;Cyclophosphamide	Complete Response;Complete Response	Not Available;Not Available		Positive	Not Available	Positive	Not Available	Negative	2+	Not Available	Alive	TUMOR FREE	0	381	0	381
TCGA-C8-A26X-01A-31R-A16F-07	Tumor	Yes	No	FEMALE	ASIAN	58	Post (prior bilateral ovariectomy OR >12 mo since LMP with no prior hysterectomy)	Right Upper Outer Quadrant	Tumor resection	Infiltrating Ductal Carcinoma	No	Modified Radical Mastectomy	Not Available	Negative	Not Available	Not Available	N1	T1	Stage IIA	M0	NO	Not Available	5-Flourouracil;Cyclophosphamide;Doxorubicin	Complete Response;Complete Response;Complete Response	Not Available;Not Available;Not Available	TNBC	Negative	Not Available	Negative	Not Available	Negative	1+	Not Available	Alive	TUMOR FREE	0	376	0	376
TCGA-C8-A26Y-01A-11R-A16F-07	Tumor	Yes	No	FEMALE	ASIAN	90	Post (prior bilateral ovariectomy OR >12 mo since LMP with no prior hysterectomy)	Left Upper Outer Quadrant	Tumor resection	Infiltrating Ductal Carcinoma	No	Modified Radical Mastectomy	Not Available	Negative	Not Available	Not Available	N0	T2	Stage IIA	M0	NO	Not Available				TNBC	Negative	Not Available	Negative	Not Available	Negative	1+	Not Available	Alive	TUMOR FREE	0	394	0	394
TCGA-C8-A26Z-01A-11R-A16F-07	Tumor	Yes	No	FEMALE	ASIAN	59	Post (prior bilateral ovariectomy OR >12 mo since LMP with no prior hysterectomy)	Right Upper Inner Quadrant	Other method, specify:	Infiltrating Ductal Carcinoma	No	Other	Not Available	Negative	Not Available	Not Available	N0	T2	Stage IIA	M0	NO;NO	Not Available	Tamoxifen	Complete Response	Not Available		Positive	Not Available	Positive	Not Available	Negative	1+	Not Available	Alive	TUMOR FREE	0	470	0	470
TCGA-C8-A273-01A-11R-A16F-07	Tumor	Yes	No	FEMALE	ASIAN	29	Pre (<6 months since LMP AND no prior bilateral ovariectomy AND not on estrogen replacement)	Right Upper Inner Quadrant	Other method, specify:	Infiltrating Ductal Carcinoma	No	Other	Axillary lymph node dissection alone	Negative	7	2	N1	T2	Stage IIB	M0	NO;NO	Not Available	Tamoxifen	Discrepancy	Not Available		Positive	Not Available	Positive	Not Available	Negative	Not Available	Not Available	Alive	TUMOR FREE	0	513	0	513
TCGA-C8-A274-01A-11R-A16F-07	Tumor	Yes	No	FEMALE	ASIAN	63	Post (prior bilateral ovariectomy OR >12 mo since LMP with no prior hysterectomy)	Right	Other method, specify:	Infiltrating Ductal Carcinoma	No	Other	Not Available	Negative	Not Available	Not Available	N0	T2	Stage IIA	M0	NO;NO	Not Available	Tamoxifen	Discrepancy	Not Available		Positive	Not Available	Positive	Not Available	Negative	1+	Not Available	Alive	TUMOR FREE	0	508	0	508
TCGA-C8-A275-01A-21R-A16F-07	Tumor	Yes	No	FEMALE	ASIAN	56	Post (prior bilateral ovariectomy OR >12 mo since LMP with no prior hysterectomy)	Left Upper Outer Quadrant	Tumor resection	Infiltrating Ductal Carcinoma	No	Other	Not Available	Negative	Not Available	Not Available	N1	T1	Stage IIA	M0		Not Available				TNBC	Negative	Not Available	Negative	Not Available	Negative	Not Available	Not Available	Alive	TUMOR FREE	0	1	0	1
TCGA-C8-A278-01A-11R-A169-07	Tumor	Yes	No	FEMALE	ASIAN	61	Post (prior bilateral ovariectomy OR >12 mo since LMP with no prior hysterectomy)	Left	Other method, specify:	Infiltrating Ductal Carcinoma	No	Other	Not Available	Negative	Not Available	Not Available	N2	T2	Stage IIIA	M0	NO	Not Available	Tamoxifen	Discrepancy	Not Available	Her-2	Negative	Not Available	Negative	Not Available	Positive	3+	Not Available	Alive	TUMOR FREE	0	297	0	297
[truncated: 413 more rows]
