# Supplementary material for: HNRNPA2B1 is a potential biomarker of breast cancer related to prognosis and immune infiltration
Source: Aging (Albany NY). 2023 Sep 5;15(17):8712–28. doi: 10.18632/aging.204992 (PMC10522385; doi:10.18632/aging.204992)
Supplement: Supplementary Table 4 [file aging-15-204992-s004.xlsx]

## Sheet: Supplementary Table 4
Supplementary Table 4. The information of cell lines from CCLE database.
Depmap ID	Expression 22Q2 Public	Cell Line Name	Primary Disease	Lineage	Lineage Subtype
ACH-000001	9.40521	NIHOVCAR3	Ovarian Cancer	Ovary	Ovary Adenocarcinoma
ACH-000002	8.72806	HL60	Leukemia	Blood	AML
ACH-000003	9.22009	CACO2	Colon/Colorectal Cancer	Colorectal	Colorectal Adenocarcinoma
ACH-000004	9.3906	HEL	Leukemia	Blood	AML
ACH-000005	10.0553	HEL9217	Leukemia	Blood	AML
ACH-000006	10.103	MONOMAC6	Leukemia	Blood	AML
ACH-000007	9.44566	LS513	Colon/Colorectal Cancer	Colorectal	Colorectal Adenocarcinoma
ACH-000008	9.78218	A101D	Skin Cancer	Skin	Melanoma
ACH-000009	9.5793	C2BBE1	Colon/Colorectal Cancer	Colorectal	Colorectal Adenocarcinoma
ACH-000011	8.70729	253J	Bladder Cancer	Urinary Tract	Bladder Carcinoma
ACH-000012	9.48176	HCC827	Lung Cancer	Lung	NSCLC
ACH-000013	9.36571	ONCODG1	Ovarian Cancer	Ovary	Ovary Adenocarcinoma
ACH-000014	9.41884	HS294T	Skin Cancer	Skin	Melanoma
ACH-000015	10.0347	NCIH1581	Lung Cancer	Lung	NSCLC
ACH-000016	8.77765	SLR21	Kidney Cancer	Kidney	Renal Cell Carcinoma
ACH-000017	9.53103	SKBR3	Breast Cancer	Breast	Breast Carcinoma
ACH-000018	9.86273	T24	Bladder Cancer	Urinary Tract	Bladder Carcinoma
ACH-000019	9.76195	MCF7	Breast Cancer	Breast	Breast Carcinoma
ACH-000020	10.1302	MHHCALL2	Leukemia	Blood	ALL
ACH-000021	9.07377	NCIH1693	Lung Cancer	Lung	NSCLC
ACH-000022	9.49659	PATU8988S	Pancreatic Cancer	Pancreas	Exocrine
ACH-000023	9.94739	PATU8988T	Pancreatic Cancer	Pancreas	Exocrine
ACH-000024	8.96798	OPM2	Myeloma	Plasma Cell	Multiple Myeloma
ACH-000025	9.52056	CH157MN	Brain Cancer	Central Nervous System	Meningioma
ACH-000026	9.66461	253JBV	Bladder Cancer	Urinary Tract	Bladder Carcinoma
ACH-000027	9.69903	GOS3	Brain Cancer	Central Nervous System	Glioma
ACH-000028	10.033	KPL1	Breast Cancer	Breast	Breast Carcinoma
ACH-000029	9.56624	HCC827GR5	Lung Cancer	Lung	NSCLC
ACH-000030	9.73156	PC14	Lung Cancer	Lung	NSCLC
ACH-000031	9.16606	PANC0213	Pancreatic Cancer	Pancreas	Exocrine
ACH-000032	10.3009	MHHCALL3	Leukemia	Blood	ALL
ACH-000033	9.29147	NCIH1819	Lung Cancer	Lung	NSCLC
ACH-000034	7.9888	PLB985	Leukemia	Blood	AML
ACH-000035	10.1098	NCIH1650	Lung Cancer	Lung	NSCLC
ACH-000036	9.24634	U343	Brain Cancer	Central Nervous System	Glioma
ACH-000037	9.30854	S117	Sarcoma	Soft Tissue	Thyroid Sarcoma
ACH-000038	9.15299	EHEB	Lymphoma	Lymphocyte	Lymphoma Unspecified
ACH-000039	10.2339	SKNMC	Bone Cancer	Bone	Ewing Sarcoma
ACH-000040	9.44537	U118MG	Brain Cancer	Central Nervous System	Glioma
ACH-000041	9.91522	RDES	Bone Cancer	Bone	Ewing Sarcoma
ACH-000042	9.4157	PANC0203	Pancreatic Cancer	Pancreas	Exocrine
ACH-000043	8.81317	HS895T	Non-Cancerous	Fibroblast	Fibroblast Skin
ACH-000044	9.34955	MDAMB134VI	Breast Cancer	Breast	Breast Ductal Carcinoma
ACH-000045	9.50466	MV411	Leukemia	Blood	AML
ACH-000046	9.75168	ACHN	Kidney Cancer	Kidney	Renal Cell Carcinoma
ACH-000048	9.83738	TOV112D	Ovarian Cancer	Ovary	Ovary Adenocarcinoma
ACH-000049	9.47295	HEKTE	Non-Cancerous	Kidney
ACH-000050	8.3332	NCIH929	Myeloma	Plasma Cell	Multiple Myeloma
ACH-000051	9.74027	TE617T	Sarcoma	Soft Tissue	Rhabdomyosarcoma
ACH-000052	10.1043	A673	Bone Cancer	Bone	Ewing Sarcoma
ACH-000053	9.46236	KARPAS299	Lymphoma	Lymphocyte	Non Hodgkin Lymphoma
ACH-000054	10.0728	HT1080	Sarcoma	Soft Tissue	Fibrosarcoma
ACH-000055	9.49873	D283MED	Brain Cancer	Central Nervous System	Medulloblastoma
ACH-000056	9.79131	DOHH2	Lymphoma	Lymphocyte	Non Hodgkin Lymphoma
ACH-000057	9.22098	OPM1	Myeloma	Plasma Cell	Multiple Myeloma
ACH-000058	9.14911	ML1	Thyroid Cancer	Thyroid	Thyroid Carcinoma
ACH-000059	10.0307	SUPB15	Leukemia	Blood	ALL
ACH-000060	9.83101	PANC1005	Pancreatic Cancer	Pancreas	Exocrine
ACH-000061	10.3367	HH	Lymphoma	Lymphocyte	Non Hodgkin Lymphoma
ACH-000062	9.43329	RERFLCMS	Lung Cancer	Lung	NSCLC
ACH-000063	8.91979	HS616T	Non-Cancerous	Fibroblast	Fibroblast Lymphocyte
ACH-000064	8.72076	SALE	Non-Cancerous	Lung
ACH-000065	9.19582	OCIAML5	Leukemia	Blood	AML
ACH-000066	10.3142	HCC4006	Lung Cancer	Lung	NSCLC
ACH-000067	9.87357	HS683	Brain Cancer	Central Nervous System	Glioma
ACH-000068	9.32314	REC1	Lymphoma	Lymphocyte	Non Hodgkin Lymphoma
ACH-000069	10.0471	HS611T	Lymphoma	Lymphocyte	Hodgkin Lymphoma
ACH-000070	10.1217	697	Leukemia	Blood	ALL
ACH-000071	9.54549	HS706T	Non-Cancerous	Fibroblast	Fibroblast Bone
ACH-000072	9.75442	MEG01	Leukemia	Blood	CML
ACH-000073	9.45687	GRANTA519	Lymphoma	Lymphocyte	Non Hodgkin Lymphoma
ACH-000074	9.81487	KU812	Leukemia	Blood	CML
ACH-000075	9.49215	U87MG	Brain Cancer	Central Nervous System	Glioma
ACH-000076	9.68097	NCO2	Leukemia	Blood	CML
ACH-000077	10.1956	MJ	Lymphoma	Lymphocyte	Non Hodgkin Lymphoma
ACH-000078	8.67447	MHHNB11	Neuroblastoma	Peripheral Nervous System	Neuroblastoma
ACH-000079	8.26749	TE125T	Non-Cancerous	Fibroblast	Fibroblast Soft Tissue
ACH-000080	9.50012	BDCM	Leukemia	Blood	AML
ACH-000081	9.57892	GDM1	Leukemia	Blood	AML
ACH-000082	9.82749	G292CLONEA141B1	Bone Cancer	Bone	Osteosarcoma
ACH-000083	9.05666	HS281T	Non-Cancerous	Fibroblast	Fibroblast Breast
ACH-000084	9.38819	MUTZ3	Leukemia	Blood	AML
ACH-000085	9.81343	T3M4	Pancreatic Cancer	Pancreas	Exocrine
ACH-000086	8.5752	ACCMESO1	Lung Cancer	Lung	Mesothelioma
ACH-000087	10.4386	SKES1	Bone Cancer	Bone	Ewing Sarcoma
ACH-000088	8.75549	HS172T	Non-Cancerous	Fibroblast	Fibroblast Urinary Tract
ACH-000089	9.61043	NCIH684	Colon/Colorectal Cancer	Colorectal	Colorectal Adenocarcinoma
ACH-000090	9.24743	PC3	Prostate Cancer	Prostate	Prostate Adenocarcinoma
ACH-000091	7.87338	OV56	Ovarian Cancer	Ovary	Ovary Adenocarcinoma
ACH-000092	9.82956	NCIH2452	Lung Cancer	Lung	Mesothelioma
ACH-000093	9.62223	PANC0504	Pancreatic Cancer	Pancreas	Exocrine
ACH-000094	9.12781	HPAFII	Pancreatic Cancer	Pancreas	Exocrine
ACH-000095	10.4405	D341	Brain Cancer	Central Nervous System	Medulloblastoma
ACH-000096	10.1399	G401	Rhabdoid	Kidney	Malignant Rhabdoid Tumor
ACH-000097	9.51434	ZR751	Breast Cancer	Breast	Breast Ductal Carcinoma
ACH-000098	9.97957	GAMG	Brain Cancer	Central Nervous System	Glioma
ACH-000099	9.38465	SIMA	Neuroblastoma	Peripheral Nervous System	Neuroblastoma
ACH-000100	9.75861	RH41	Sarcoma	Soft Tissue	Rhabdomyosarcoma
ACH-000101	10.1169	KE37	Leukemia	Blood	ALL
ACH-000102	9.85638	GMS10	Brain Cancer	Central Nervous System	Glioma
ACH-000103	9.10415	CAOV4	Ovarian Cancer	Ovary	Ovary Adenocarcinoma
ACH-000104	10.3155	LOUCY	Leukemia	Blood	ALL
ACH-000105	10.4204	ALLSIL	Leukemia	Blood	ALL
ACH-000106	8.83194	JVM2	Lymphoma	Lymphocyte	Non Hodgkin Lymphoma
ACH-000107	9.85551	CAPAN2	Pancreatic Cancer	Pancreas	Exocrine
ACH-000108	9.44653	KP3	Pancreatic Cancer	Pancreas	Exocrine
ACH-000109	9.76909	NCIH3255	Lung Cancer	Lung	NSCLC
ACH-000110	9.44039	NCCSTCK140	Gastric Cancer	Gastric	Gastric Adenocarcinoma
ACH-000111	9.89556	HCC1187	Breast Cancer	Breast	Breast Ductal Carcinoma
ACH-000112	9.93848	SIGM5	Leukemia	Blood	AML
ACH-000113	9.17779	OCIAML2	Leukemia	Blood	AML
ACH-000114	8.86335	SU8686	Pancreatic Cancer	Pancreas	Exocrine
ACH-000115	9.73386	VCAP	Prostate Cancer	Prostate	Prostate Adenocarcinoma
ACH-000116	9.38427	OAW28	Ovarian Cancer	Ovary	Ovary Adenocarcinoma
ACH-000117	8.75946	EFM192A	Breast Cancer	Breast	Breast Adenocarcinoma
ACH-000118	9.47687	HUPT3	Pancreatic Cancer	Pancreas	Exocrine
ACH-000119	9.16596	HS863T	Non-Cancerous	Fibroblast	Fibroblast Bone
ACH-000120	9.80366	CHP212	Neuroblastoma	Peripheral Nervous System	Neuroblastoma
ACH-000121	9.64954	NCIH2405	Lung Cancer	Lung	NSCLC
ACH-000122	9.75707	SUPT11	Leukemia	Blood	ALL
ACH-000123	9.5092	COV434	Ovarian Cancer	Ovary	Ovary Adenocarcinoma
ACH-000124	8.9183	OCILY19	Lymphoma	Lymphocyte	Non Hodgkin Lymphoma
ACH-000125	9.19394	TO175T	Non-Cancerous	Fibroblast	Fibroblast Lymphocyte
ACH-000126	9.25302	KG1C	Brain Cancer	Central Nervous System	Glioma
ACH-000127	9.39036	SLR20	Bladder Cancer	Urinary Tract	Bladder Carcinoma
ACH-000128	9.60561	LN319	Brain Cancer	Central Nervous System	Glioma
ACH-000129	10.4819	NCIH1341	Lung Cancer	Lung	SCLC
ACH-000130	10.0437	NALM19	Leukemia	Blood	ALL
ACH-000131	9.71282	HS229T	Non-Cancerous	Fibroblast	Fibroblast Lung
ACH-000132	8.44253	JHOS2	Ovarian Cancer	Ovary	Ovary Adenocarcinoma
ACH-000133	10.0815	HS729	Unknown	Soft Tissue	Rhabdomyosarcoma, Embryonal
ACH-000134	8.61967	HS274T	Non-Cancerous	Fibroblast	Fibroblast Breast
ACH-000135	8.82763	HS940T	Non-Cancerous	Fibroblast	Fibroblast Skin
ACH-000136	9.37955	CHP126	Neuroblastoma	Peripheral Nervous System	Neuroblastoma
ACH-000137	9.64276	8MGBA	Brain Cancer	Central Nervous System	Glioma
ACH-000138	8.95757	CFPAC1	Pancreatic Cancer	Pancreas	Exocrine
ACH-000139	9.03061	PANC0327	Pancreatic Cancer	Pancreas	Exocrine
ACH-000140	10.1481	PFEIFFER	Lymphoma	Lymphocyte	Non Hodgkin Lymphoma
ACH-000141	9.73011	SNU308	Gallbladder Cancer	Bile Duct	Gallbladder Adenocarcinoma
ACH-000142	9.46516	CAL29	Bladder Cancer	Urinary Tract	Bladder Carcinoma
ACH-000143	10.2727	HCC2429	Lung Cancer	Lung	NSCLC
ACH-000144	10.0001	RERFGC1B	Gastric Cancer	Gastric	Gastric Adenocarcinoma
ACH-000145	9.39086	SKLMS1	Sarcoma	Soft Tissue	Leiomyosarcoma
ACH-000146	9.87819	THP1	Leukemia	Blood	AML
ACH-000147	9.73393	T47D	Breast Cancer	Breast	Breast Ductal Carcinoma
ACH-000148	8.93404	HS578T	Breast Cancer	Breast	Breast Carcinoma
ACH-000149	9.86425	SKNSH	Neuroblastoma	Peripheral Nervous System	Neuroblastoma
ACH-000150	9.63109	HCC2935	Lung Cancer	Lung	NSCLC
ACH-000151	10.114	JM1	Leukemia	Blood	ALL
ACH-000152	10.0492	M059K	Brain Cancer	Central Nervous System	Glioma
ACH-000153	9.2727	NCIH2052	Lung Cancer	Lung	Mesothelioma
ACH-000154	9.39947	HS888T	Non-Cancerous	Fibroblast	Fibroblast Bone
ACH-000155	9.1914	SW1990	Pancreatic Cancer	Pancreas	Exocrine
ACH-000156	10.0599	MHHCALL4	Leukemia	Blood	ALL
ACH-000157	9.96766	A4FUK	Lymphoma	Lymphocyte	Non Hodgkin Lymphoma
ACH-000158	9.51369	OCILY3	Lymphoma	Lymphocyte	Non Hodgkin Lymphoma
ACH-000159	9.38165	OSRC2	Kidney Cancer	Kidney	Renal Cell Carcinoma
ACH-000160	9.18542	BT12	Rhabdoid	Soft Tissue	ATRT
ACH-000161	9.04571	CORL105	Lung Cancer	Lung	NSCLC
ACH-000162	10.4071	GA10	Lymphoma	Lymphocyte	Non Hodgkin Lymphoma
ACH-000163	9.99478	SW579	Thyroid Cancer	Thyroid	Thyroid Squamous
ACH-000164	10.1714	PANC1	Pancreatic Cancer	Pancreas	Exocrine
ACH-000165	8.81115	HS751T	Non-Cancerous	Fibroblast	Fibroblast Lymphocyte
ACH-000166	9.20413	KASUMI6	Leukemia	Blood	AML
ACH-000167	9.37082	KE97	Myeloma	Plasma Cell	Multiple Myeloma
ACH-000168	9.36907	NOMO1	Leukemia	Blood	AML
ACH-000169	10.0856	RD	Sarcoma	Soft Tissue	Rhabdomyosarcoma
ACH-000170	9.25238	PRECLH	Non-Cancerous	Prostate
ACH-000171	9.00717	VMRCRCZ	Kidney Cancer	Kidney	Renal Cell Carcinoma
ACH-000172	9.46548	TM87	Rhabdoid	Soft Tissue	Malignant Rhabdoid Tumor
ACH-000173	8.95181	JHUEM3	Endometrial/Uterine Cancer	Uterus	Endometrial Adenocarcinoma
ACH-000174	9.21213	CAL62	Thyroid Cancer	Thyroid	Thyroid Carcinoma
ACH-000175	8.76208	TE159T	Non-Cancerous	Fibroblast	Fibroblast Soft Tissue
ACH-000176	9.49997	LOUNH91	Lung Cancer	Lung	NSCLC
ACH-000177	9.98996	NCIH660	Prostate Cancer	Prostate	Prostate Small Cell
ACH-000178	8.96038	HS766T	Pancreatic Cancer	Pancreas	Exocrine
ACH-000179	10.3975	NCIH1618	Lung Cancer	Lung	SCLC
ACH-000180	9.30629	HS839T	Non-Cancerous	Fibroblast	Fibroblast Skin
ACH-000181	8.86112	SCC9	Head and Neck Cancer	Upper Aerodigestive	Upper Aerodigestive Squamous
ACH-000182	8.83548	SNU869	Bile Duct Cancer	Bile Duct	Cholangiocarcinoma
ACH-000183	9.01567	L363	Myeloma	Plasma Cell	Multiple Myeloma
ACH-000184	9.23182	HS343T	Non-Cancerous	Fibroblast	Fibroblast Breast
ACH-000185	8.43534	HS737T	Non-Cancerous	Fibroblast	Fibroblast Bone
ACH-000186	9.2727	NCIH2444	Lung Cancer	Lung	NSCLC
ACH-000187	10.1088	CORL311	Lung Cancer	Lung	SCLC
ACH-000188	8.55961	SCC25	Head and Neck Cancer	Upper Aerodigestive	Upper Aerodigestive Squamous
ACH-000189	8.51416	RCC10RGB	Kidney Cancer	Kidney	Renal Cell Carcinoma
ACH-000190	9.22916	HDMYZ	Unknown	Unknown
ACH-000191	9.03485	BHT101	Thyroid Cancer	Thyroid	Thyroid Carcinoma
ACH-000192	9.84046	MFE280	Endometrial/Uterine Cancer	Uterus	Endometrial Adenocarcinoma
ACH-000193	9.7541	KARPAS620	Myeloma	Plasma Cell	Multiple Myeloma
ACH-000194	9.16822	HS934T	Non-Cancerous	Fibroblast	Fibroblast Skin
ACH-000195	9.7028	SET2	Leukemia	Blood	AML
ACH-000196	8.77755	HCC1599	Breast Cancer	Breast	Breast Ductal Carcinoma
ACH-000197	10.049	TALL1	Leukemia	Blood	ALL
ACH-000198	9.25165	EOL1	Leukemia	Blood	AML
ACH-000199	8.12386	HS255T	Non-Cancerous	Fibroblast	Fibroblast Colorectal
ACH-000200	9.60759	NMCG1	Brain Cancer	Central Nervous System	Glioma
ACH-000201	9.69216	A204	Rhabdoid	Soft Tissue	Malignant Rhabdoid Tumor
ACH-000202	9.7687	COLO320	Colon/Colorectal Cancer	Colorectal	Colorectal Adenocarcinoma
ACH-000203	9.86566	NH6	Neuroblastoma	Peripheral Nervous System	Neuroblastoma
ACH-000204	8.3644	LP1	Myeloma	Plasma Cell	Multiple Myeloma
ACH-000205	8.7417	PK59	Pancreatic Cancer	Pancreas	Exocrine
ACH-000206	10.3616	C8166	Lymphoma	Lymphocyte	ATL
ACH-000207	9.47919	DETROIT562	Head and Neck Cancer	Upper Aerodigestive	Upper Aerodigestive Squamous
ACH-000208	9.60903	U178	Brain Cancer	Central Nervous System	Glioma
ACH-000209	8.97877	SNU1079	Bile Duct Cancer	Bile Duct	Cholangiocarcinoma
ACH-000210	9.28951	CADOES1	Bone Cancer	Bone	Ewing Sarcoma
ACH-000211	10.3116	DAOY	Brain Cancer	Central Nervous System	Medulloblastoma
ACH-000212	8.67751	CAL120	Breast Cancer	Breast	Breast Carcinoma
ACH-000213	9.06765	HUPT4	Pancreatic Cancer	Pancreas	Exocrine
ACH-000214	8.8896	HS675T	Non-Cancerous	Fibroblast	Fibroblast Colorectal
ACH-000215	9.68846	LN382	Brain Cancer	Central Nervous System	Glioma
ACH-000216	9.5562	JHESOAD1	Esophageal Cancer	Esophagus	Esophagus Adenocarcinoma
ACH-000217	9.01036	JHH6	Liver Cancer	Liver	Hepatocellular Carcinoma
ACH-000218	9.2878	PL21	Leukemia	Blood	AML
ACH-000219	10.169	A375	Skin Cancer	Skin	Melanoma
ACH-000220	10.6056	MINO	Lymphoma	Lymphocyte	Non Hodgkin Lymphoma
ACH-000221	9.29818	SNU398	Liver Cancer	Liver	Hepatocellular Carcinoma
ACH-000222	9.06089	ASPC1	Pancreatic Cancer	Pancreas	Exocrine
ACH-000223	9.98114	HCC1937	Breast Cancer	Breast	Breast Ductal Carcinoma
ACH-000224	8.36549	HS819T	Non-Cancerous	Fibroblast	Fibroblast Bone
ACH-000225	10.043	ECC12	Gastric Cancer	Gastric	Gastric Small Cell
ACH-000226	10.058	SUPM2	Lymphoma	Lymphocyte	Non Hodgkin Lymphoma
ACH-000227	10.0091	KPNYN	Neuroblastoma	Peripheral Nervous System	Neuroblastoma
ACH-000228	8.73339	BICR31	Head and Neck Cancer	Upper Aerodigestive	Upper Aerodigestive Squamous
ACH-000229	8.12241	HS822T	Non-Cancerous	Fibroblast	Fibroblast Bone
ACH-000230	7.36999	HS742T	Non-Cancerous	Fibroblast	Fibroblast Breast
ACH-000231	9.70613	KALS1	Brain Cancer	Central Nervous System	Glioma
ACH-000232	9.31938	U251MG	Brain Cancer	Central Nervous System	Glioma
ACH-000233	9.2022	DEL	Lymphoma	Lymphocyte	Non Hodgkin Lymphoma
ACH-000234	9.45432	CAKI2	Kidney Cancer	Kidney	Renal Cell Carcinoma
ACH-000235	9.52581	PANC0403	Pancreatic Cancer	Pancreas	Exocrine
ACH-000236	9.78462	SW1417	Colon/Colorectal Cancer	Colorectal	Colorectal Adenocarcinoma
ACH-000237	8.68787	JHOM1	Ovarian Cancer	Ovary	Ovary Adenocarcinoma
ACH-000238	9.27533	SCC4	Head and Neck Cancer	Upper Aerodigestive	Upper Aerodigestive Squamous
ACH-000239	9.81336	HUG1N	Gastric Cancer	Gastric	Gastric Adenocarcinoma
ACH-000240	8.97401	HS600T	Non-Cancerous	Fibroblast	Fibroblast Skin
ACH-000241	8.36846	JK1	Leukemia	Blood	CML
ACH-000242	9.6871	RT4	Bladder Cancer	Urinary Tract	Bladder Carcinoma
ACH-000243	9.84577	DANG	Pancreatic Cancer	Pancreas	Exocrine
ACH-000244	9.16947	DKMG	Brain Cancer	Central Nervous System	Glioma
ACH-000245	10.4676	BL41	Lymphoma	Lymphocyte	Non Hodgkin Lymphoma
ACH-000246	9.30209	SLR23	Kidney Cancer	Kidney	Renal Cell Carcinoma
ACH-000247	9.4523	OCUM1	Gastric Cancer	Gastric	Gastric Adenocarcinoma
ACH-000248	9.70689	AU565	Breast Cancer	Breast	Breast Adenocarcinoma
ACH-000249	10.0055	CL11	Colon/Colorectal Cancer	Colorectal	Colorectal Adenocarcinoma
ACH-000250	9.38185	KMRC20	Kidney Cancer	Kidney	Renal Cell Carcinoma
ACH-000251	9.37836	NCIH2887	Lung Cancer	Lung	NSCLC
ACH-000252	9.48728	LS1034	Colon/Colorectal Cancer	Colorectal	Colorectal Adenocarcinoma
ACH-000253	9.72334	COLO201	Colon/Colorectal Cancer	Colorectal	Colorectal Adenocarcinoma
ACH-000254	8.74086	SCC15	Head and Neck Cancer	Upper Aerodigestive	Upper Aerodigestive Squamous
ACH-000255	10.01	LMSU	Gastric Cancer	Gastric	Gastric Adenocarcinoma
ACH-000256	9.23096	COV318	Ovarian Cancer	Ovary	Ovary Adenocarcinoma
ACH-000257	9.93503	CORL279	Lung Cancer	Lung	SCLC
ACH-000258	10.1289	DU4475	Breast Cancer	Breast	Breast Carcinoma
ACH-000259	10.1809	KELLY	Neuroblastoma	Peripheral Nervous System	Neuroblastoma
ACH-000260	9.87753	SKNAS	Neuroblastoma	Peripheral Nervous System	Neuroblastoma
ACH-000261	9.90836	RERFLCAI	Lung Cancer	Lung	NSCLC
ACH-000262	9.55651	UOK101	Kidney Cancer	Kidney	Renal Cell Carcinoma
ACH-000263	9.55932	KASUMI1	Leukemia	Blood	AML
ACH-000264	9.73263	CALU6	Lung Cancer	Lung	NSCLC
ACH-000265	10.3893	KP4	Pancreatic Cancer	Pancreas	Exocrine
ACH-000266	9.23821	SNU213	Pancreatic Cancer	Pancreas	Exocrine
ACH-000267	8.92089	HDLM2	Lymphoma	Lymphocyte	Hodgkin Lymphoma
ACH-000268	9.22101	SNU245	Bile Duct Cancer	Bile Duct	Cholangiocarcinoma
ACH-000269	9.62897	AM38	Brain Cancer	Central Nervous System	Glioma
ACH-000270	9.0642	HPAC	Pancreatic Cancer	Pancreas	Exocrine
ACH-000271	9.32231	SUDHL10	Lymphoma	Lymphocyte	Non Hodgkin Lymphoma
ACH-000272	8.82101	SLR24	Kidney Cancer	Kidney	Renal Cell Carcinoma
ACH-000273	9.86668	SF539	Brain Cancer	Central Nervous System	Glioma
ACH-000274	10.8376	HS852T	Skin Cancer	Skin	Melanoma
ACH-000275	8.57807	HS834T	Non-Cancerous	Fibroblast	Fibroblast Skin
ACH-000276	9.45381	HCC38	Breast Cancer	Breast	Breast Ductal Carcinoma
ACH-000277	9.64267	HCC1419	Breast Cancer	Breast	Breast Ductal Carcinoma
ACH-000278	9.01142	COV362	Ovarian Cancer	Ovary	Ovary Adenocarcinoma
ACH-000279	9.93434	EWS502	Bone Cancer	Bone	Ewing Sarcoma
ACH-000280	9.78715	SNU840	Ovarian Cancer	Ovary	Brenner Tumor
ACH-000281	9.65519	KP2	Pancreatic Cancer	Pancreas	Exocrine
ACH-000282	9.89423	NCIH1755	Lung Cancer	Lung	NSCLC
ACH-000283	9.88716	A1207	Brain Cancer	Central Nervous System	Glioma
ACH-000284	9.2597	HS840T	Non-Cancerous	Fibroblast	Fibroblast Upper Aerodigestive
ACH-000285	10.4176	TOLEDO	Lymphoma	Lymphocyte	Non Hodgkin Lymphoma
ACH-000286	9.18745	SNU1033	Colon/Colorectal Cancer	Colorectal	Colorectal Adenocarcinoma
ACH-000287	10.006	NUDUL1	Lymphoma	Lymphocyte	Non Hodgkin Lymphoma
ACH-000288	9.77023	BT549	Breast Cancer	Breast	Breast Ductal Carcinoma
ACH-000289	9.19864	SNU466	Brain Cancer	Central Nervous System	Glioma
ACH-000290	10.4941	NCIH209	Lung Cancer	Lung	SCLC
ACH-000291	9.30834	OV90	Ovarian Cancer	Ovary	Ovary Adenocarcinoma
ACH-000292	9.79718	NCIH841	Lung Cancer	Lung	SCLC
ACH-000293	9.12998	KLE	Endometrial/Uterine Cancer	Uterus	Endometrial Adenocarcinoma
ACH-000294	10.3709	NB4	Leukemia	Blood	AML
ACH-000295	9.71896	EM2	Leukemia	Blood	CML
ACH-000296	9.20403	OUMS23	Colon/Colorectal Cancer	Colorectal	Colorectal Adenocarcinoma
ACH-000297	9.8438	NCIH889	Lung Cancer	Lung	SCLC
ACH-000298	10.1487	NCIH2029	Lung Cancer	Lung	SCLC
ACH-000299	9.48931	HNT34	Leukemia	Blood	AML
ACH-000300	9.79404	SLR25	Kidney Cancer	Kidney	Renal Cell Carcinoma
ACH-000301	8.92701	LAMA84	Leukemia	Blood	CML
ACH-000302	8.23625	SNU1077	Endometrial/Uterine Cancer	Uterus	Mullerian Carcinoma
ACH-000303	10.1311	SNU5	Gastric Cancer	Gastric	Gastric Adenocarcinoma
ACH-000304	10.2814	WM115	Skin Cancer	Skin	Melanoma
ACH-000305	8.58785	ECGI10	Esophageal Cancer	Esophagus	Esophagus Squamous
ACH-000306	8.82683	HS688AT	Non-Cancerous	Fibroblast	Fibroblast Skin
ACH-000307	9.45767	PK1	Pancreatic Cancer	Pancreas	Exocrine
ACH-000308	9.36549	EFO21	Ovarian Cancer	Ovary	Ovary Adenocarcinoma
ACH-000310	9.99464	IMR32	Neuroblastoma	Peripheral Nervous System	Neuroblastoma
ACH-000311	9.36781	NCIH2122	Lung Cancer	Lung	NSCLC
ACH-000312	10.0538	SKNBE2	Neuroblastoma	Peripheral Nervous System	Neuroblastoma
ACH-000313	8.77663	KMRC3	Kidney Cancer	Kidney	Renal Cell Carcinoma
ACH-000314	9.78418	HCC2108	Lung Cancer	Lung	NSCLC
ACH-000315	9.64483	KARPAS422	Lymphoma	Lymphocyte	Non Hodgkin Lymphoma
ACH-000316	10.0576	SNU886	Liver Cancer	Liver	Hepatocellular Carcinoma
ACH-000317	8.84005	TUHR14TKB	Kidney Cancer	Kidney	Renal Cell Carcinoma
ACH-000318	9.40829	TE10	Esophageal Cancer	Esophagus	Esophagus Squamous
ACH-000319	9.22243	MPP89	Lung Cancer	Lung	Mesothelioma
ACH-000320	9.26017	PSN1	Pancreatic Cancer	Pancreas	Exocrine
ACH-000321	8.72021	MOLM6	Leukemia	Blood	CML
ACH-000322	9.90011	HT144	Skin Cancer	Skin	Melanoma
ACH-000323	9.78542	42MGBA	Brain Cancer	Central Nervous System	Glioma
ACH-000324	9.74739	JHOC5	Ovarian Cancer	Ovary	Ovary Adenocarcinoma
ACH-000325	8.94117	SNU620	Gastric Cancer	Gastric	Gastric Adenocarcinoma
ACH-000326	9.03656	JURLMK1	Leukemia	Blood	CML
ACH-000327	8.53103	NCIH1395	Lung Cancer	Lung	NSCLC
ACH-000328	10.5615	LN215	Brain Cancer	Central Nervous System	Glioma
ACH-000329	9.517	CCFSTTG1	Brain Cancer	Central Nervous System	Glioma
ACH-000330	9.42074	EFM19	Breast Cancer	Breast	Breast Ductal Carcinoma
ACH-000331	9.52922	ISTMES2	Lung Cancer	Lung	Mesothelioma
ACH-000332	9.69357	YAPC	Pancreatic Cancer	Pancreas	Exocrine
ACH-000333	9.72235	JHOM2B	Ovarian Cancer	Ovary	Ovary Adenocarcinoma
ACH-000334	10.1577	DB	Lymphoma	Lymphocyte	Non Hodgkin Lymphoma
ACH-000335	9.85926	MSTO211H	Lung Cancer	Lung	Mesothelioma
ACH-000336	8.25894	OCIAML3	Leukemia	Blood	AML
ACH-000337	10.1378	NCIH3122	Lung Cancer	Lung	NSCLC
ACH-000338	9.01887	SR786	Lymphoma	Lymphocyte	Non Hodgkin Lymphoma
ACH-000339	9.84095	HCC461	Lung Cancer	Lung	NSCLC
ACH-000340	9.25661	HS870T	Non-Cancerous	Fibroblast	Fibroblast Bone
ACH-000341	9.90745	SKNFI	Neuroblastoma	Peripheral Nervous System	Neuroblastoma
ACH-000342	9.16662	CL14	Colon/Colorectal Cancer	Colorectal	Colorectal Adenocarcinoma
ACH-000343	9.52675	NCIH522	Lung Cancer	Lung	NSCLC
ACH-000344	9.50275	SNU668	Gastric Cancer	Gastric	Gastric Adenocarcinoma
ACH-000345	9.84405	KPNRTBM1	Neuroblastoma	Peripheral Nervous System	Neuroblastoma
ACH-000346	8.8381	JVM3	Leukemia	Blood	CLL
ACH-000347	9.89353	QGP1	Pancreatic Cancer	Pancreas	Endocrine
ACH-000348	9.33829	RPMI7951	Skin Cancer	Skin	Melanoma
ACH-000349	9.45697	HCC1500	Breast Cancer	Breast	Breast Ductal Carcinoma
ACH-000350	9.55909	COLO678	Colon/Colorectal Cancer	Colorectal	Colorectal Adenocarcinoma
ACH-000351	9.46838	MKN1	Gastric Cancer	Gastric	Gastric Adenocarcinoma
ACH-000352	9.90579	HCC1428	Breast Cancer	Breast	Breast Carcinoma
ACH-000353	9.80347	TE15	Esophageal Cancer	Esophagus	Esophagus Squamous
ACH-000354	9.68818	CAPAN1	Pancreatic Cancer	Pancreas	Exocrine
ACH-000355	10.3071	NCIH82	Lung Cancer	Lung	SCLC
ACH-000356	9.87154	MKN45	Gastric Cancer	Gastric	Gastric Adenocarcinoma
ACH-000357	9.69479	JEKO1	Lymphoma	Lymphocyte	Non Hodgkin Lymphoma
ACH-000358	10.4537	NCIH69	Lung Cancer	Lung	SCLC
ACH-000359	9.72303	MG63	Bone Cancer	Bone	Osteosarcoma
ACH-000360	8.62037	NCIH508	Colon/Colorectal Cancer	Colorectal	Caecum Adenocarcinoma
ACH-000361	9.39795	SKHEP1	Liver Cancer	Liver	Hepatocellular Carcinoma
ACH-000362	9.49765	MOLM13	Leukemia	Blood	AML
ACH-000363	9.07778	SKMM2	Myeloma	Plasma Cell	Multiple Myeloma
ACH-000364	9.90875	U2OS	Bone Cancer	Bone	Osteosarcoma
ACH-000365	8.86771	SUDHL4	Lymphoma	Lymphocyte	Non Hodgkin Lymphoma
ACH-000366	10.3222	SKNDZ	Neuroblastoma	Peripheral Nervous System	Neuroblastoma
ACH-000367	9.98797	NCIH226	Lung Cancer	Lung	NSCLC
ACH-000368	9.65723	SNU1105	Brain Cancer	Central Nervous System	Glioma
ACH-000369	9.66165	MOLM16	Leukemia	Blood	AML
ACH-000370	9.98413	SNU626	Brain Cancer	Central Nervous System	Glioma
ACH-000371	9.96248	RL	Lymphoma	Lymphocyte	Non Hodgkin Lymphoma
ACH-000372	10.2869	P12ICHIKAWA	Leukemia	Blood	ALL
ACH-000373	9.85417	SKM1	Leukemia	Blood	AML
ACH-000374	9.16987	HCC1143	Breast Cancer	Breast	Breast Ductal Carcinoma
ACH-000375	9.2934	G402	Kidney Cancer	Kidney
ACH-000376	9.93564	SF295	Brain Cancer	Central Nervous System	Glioma
ACH-000377	10.0647	SNU478	Bile Duct Cancer	Bile Duct	Cholangiocarcinoma
ACH-000378	9.20726	NCIH647	Lung Cancer	Lung	NSCLC
ACH-000379	10.0333	NCIH1781	Lung Cancer	Lung	NSCLC
ACH-000380	9.69916	KMS12BM	Myeloma	Plasma Cell	Multiple Myeloma
ACH-000381	9.59913	T84	Colon/Colorectal Cancer	Colorectal	Colorectal Adenocarcinoma
ACH-000382	9.70901	CORL24	Lung Cancer	Lung	SCLC
ACH-000383	9.49649	OE33	Esophageal Cancer	Esophagus	Esophagus Adenocarcinoma
ACH-000384	9.68811	SW780	Bladder Cancer	Urinary Tract	Bladder Carcinoma
ACH-000385	9.20916	SKRC20	Kidney Cancer	Kidney	Renal Cell Carcinoma
ACH-000386	10.2673	KG1	Leukemia	Blood	AML
ACH-000387	10.1752	TF1	Leukemia	Blood	AML
ACH-000388	8.31075	NUDHL1	Lymphoma	Lymphocyte	Non Hodgkin Lymphoma
ACH-000389	9.87412	H4	Brain Cancer	Central Nervous System	Glioma
ACH-000390	9.40126	LUDLU1	Lung Cancer	Lung	NSCLC
ACH-000391	9.09716	MHHES1	Bone Cancer	Bone	Ewing Sarcoma
ACH-000392	9.4028	CALU3	Lung Cancer	Lung	NSCLC
ACH-000393	9.89529	HLF	Liver Cancer	Liver	Hepatocellular Carcinoma
ACH-000394	10.0737	NCIH2081	Lung Cancer	Lung	SCLC
ACH-000395	10.3562	NCIH520	Lung Cancer	Lung	NSCLC
ACH-000396	9.89291	J82	Bladder Cancer	Urinary Tract	Bladder Carcinoma
ACH-000397	9.70548	TEN	Endometrial/Uterine Cancer	Uterus	Clear Cell Carcinoma
ACH-000398	10.137	RI1	Lymphoma	Lymphocyte	Non Hodgkin Lymphoma
ACH-000399	9.88168	NCIH2196	Lung Cancer	Lung	SCLC
ACH-000400	8.84323	SKCO1	Colon/Colorectal Cancer	Colorectal	Colorectal Adenocarcinoma
ACH-000401	10.0108	COLO800	Skin Cancer	Skin	Melanoma
ACH-000402	10.5631	BL70	Lymphoma	Lymphocyte	Non Hodgkin Lymphoma
ACH-000403	10.2499	NCIH747	Colon/Colorectal Cancer	Colorectal	Colorectal Adenocarcinoma
ACH-000404	9.69995	K029AX	Skin Cancer	Skin	Melanoma
ACH-000405	9.80391	MEC1	Leukemia	Blood	CLL
ACH-000406	9.55878	U937	Leukemia	Blood	AML
ACH-000407	9.1212	SNU685	Endometrial/Uterine Cancer	Uterus	MMMT
ACH-000408	7.90219	TE5	Esophageal Cancer	Esophagus	Esophagus Squamous
ACH-000409	8.87344	OVSAHO	Ovarian Cancer	Ovary	Ovary Adenocarcinoma
ACH-000410	9.65928	SAOS2	Bone Cancer	Bone	Osteosarcoma
ACH-000411	9.7138	769P	Kidney Cancer	Kidney	Renal Cell Carcinoma
ACH-000412	9.14139	SNU1197	Colon/Colorectal Cancer	Colorectal	Colorectal Adenocarcinoma
ACH-000413	8.91919	HS739T	Non-Cancerous	Fibroblast	Fibroblast Breast
ACH-000414	9.04218	NCIH1944	Lung Cancer	Lung	NSCLC
ACH-000415	7.94813	BICR6	Head and Neck Cancer	Upper Aerodigestive	Upper Aerodigestive Squamous
ACH-000416	9.03949	NCIH838	Lung Cancer	Lung	NSCLC
ACH-000417	9.62978	PANC0813	Pancreatic Cancer	Pancreas	Exocrine
ACH-000418	9.3617	SW1353	Bone Cancer	Bone	Chondrosarcoma
ACH-000419	9.58045	KMS28BM	Myeloma	Plasma Cell	Multiple Myeloma
ACH-000420	9.69023	SNU449	Liver Cancer	Liver	Hepatocellular Carcinoma
ACH-000421	9.73818	SW837	Colon/Colorectal Cancer	Colorectal	Colorectal Adenocarcinoma
ACH-000422	9.49542	SNU475	Liver Cancer	Liver	Hepatocellular Carcinoma
ACH-000423	9.85915	SKMEL3	Skin Cancer	Skin	Melanoma
ACH-000424	10.0975	TC71	Bone Cancer	Bone	Ewing Sarcoma
ACH-000425	9.60492	UACC62	Skin Cancer	Skin	Melanoma
ACH-000427	9.74786	NCIN87	Gastric Cancer	Gastric	Gastric Adenocarcinoma
ACH-000428	9.11751	UO31	Kidney Cancer	Kidney	Renal Cell Carcinoma
ACH-000429	7.7734	A704	Kidney Cancer	Kidney	Renal Cell Carcinoma
ACH-000430	9.99166	TYKNU	Ovarian Cancer	Ovary	Ovary Adenocarcinoma
ACH-000431	10.4873	NCIH1694	Lung Cancer	Lung	SCLC
ACH-000432	8.59197	BV173	Leukemia	Blood	CML
ACH-000433	9.12745	CAKI1	Kidney Cancer	Kidney	Renal Cell Carcinoma
ACH-000434	8.52669	NCIH1915	Lung Cancer	Lung	NSCLC
ACH-000435	8.0536	EFE184	Endometrial/Uterine Cancer	Uterus	Endometrial Adenocarcinoma
ACH-000436	8.13253	OCIMY7	Myeloma	Plasma Cell	Multiple Myeloma
ACH-000437	9.94332	SW1088	Brain Cancer	Central Nervous System	Glioma
ACH-000438	10.3647	LU65	Lung Cancer	Lung	NSCLC
ACH-000439	8.77873	ME1	Leukemia	Blood	AML
ACH-000440	8.7767	CA46	Lymphoma	Lymphocyte	Non Hodgkin Lymphoma
ACH-000441	9.1705	SH4	Skin Cancer	Skin	Melanoma
ACH-000442	9.50245	RERFLCSQ1	Lung Cancer	Lung	NSCLC
ACH-000443	9.08884	OVKATE	Ovarian Cancer	Ovary	Ovary Adenocarcinoma
ACH-000444	10.5095	LU99	Lung Cancer	Lung	NSCLC
ACH-000445	9.36947	KNS60	Brain Cancer	Central Nervous System	Glioma
ACH-000446	9.54911	KPNSI9S	Neuroblastoma	Peripheral Nervous System	Neuroblastoma
ACH-000447	9.93798	NCIH2228	Lung Cancer	Lung	NSCLC
ACH-000448	8.96417	NCIH1666	Lung Cancer	Lung	NSCLC
ACH-000449	8.82947	MESSA	Sarcoma	Soft Tissue	Uterine Sarcoma
ACH-000450	9.48424	MELHO	Skin Cancer	Skin	Melanoma
ACH-000451	9.74979	NCIH2085	Lung Cancer	Lung	NSCLC
ACH-000452	9.46401	TE8	Esophageal Cancer	Esophagus	Esophagus Squamous
ACH-000453	7.70002	MOLP2	Myeloma	Plasma Cell	Multiple Myeloma
ACH-000454	9.60866	HCC95	Lung Cancer	Lung	NSCLC
ACH-000455	9.84593	LN428	Brain Cancer	Central Nervous System	Glioma
ACH-000456	8.05853	BCPAP	Thyroid Cancer	Thyroid	Thyroid Carcinoma
ACH-000457	8.78333	CAL54	Kidney Cancer	Kidney	Renal Cell Carcinoma
ACH-000458	9.01642	CJM	Skin Cancer	Skin	Melanoma
ACH-000459	9.65762	TUHR10TKB	Kidney Cancer	Kidney	Renal Cell Carcinoma
ACH-000460	9.43796	SNU8	Ovarian Cancer	Ovary	Ovary Adenocarcinoma
ACH-000461	9.12394	SNU1196	Bile Duct Cancer	Bile Duct	Cholangiocarcinoma
ACH-000462	9.76721	NALM1	Leukemia	Blood	CML
ACH-000463	10.1794	NCIH460	Lung Cancer	Lung	NSCLC
ACH-000464	9.0284	CAS1	Brain Cancer	Central Nervous System	Glioma
ACH-000465	9.74487	SKMEL1	Skin Cancer	Skin	Melanoma
ACH-000466	9.29932	SNU216	Gastric Cancer	Gastric	Gastric Adenocarcinoma
ACH-000467	9.06261	HCC56	Colon/Colorectal Cancer	Colorectal	Colorectal Adenocarcinoma
ACH-000468	10.1898	PK45H	Pancreatic Cancer	Pancreas	Exocrine
ACH-000469	9.59634	YH13	Brain Cancer	Central Nervous System	Glioma
ACH-000470	9.43985	SW1463	Colon/Colorectal Cancer	Colorectal	Colorectal Adenocarcinoma
ACH-000471	9.62892	LI7	Liver Cancer	Liver
ACH-000472	8.6335	HSC2	Head and Neck Cancer	Upper Aerodigestive	Upper Aerodigestive Squamous
ACH-000473	9.73993	RT112	Bladder Cancer	Urinary Tract	Bladder Carcinoma
ACH-000475	9.11806	HUH1	Liver Cancer	Liver	Hepatocellular Carcinoma
ACH-000476	9.58192	JHH4	Liver Cancer	Liver	Hepatocellular Carcinoma
ACH-000477	9.11181	MALME3M	Skin Cancer	Skin	Melanoma
ACH-000478	9.74823	SNU387	Liver Cancer	Liver	Hepatocellular Carcinoma
ACH-000479	9.69643	KNS81	Brain Cancer	Central Nervous System	Glioma
ACH-000480	9.47165	HUH7	Liver Cancer	Liver	Hepatocellular Carcinoma
ACH-000481	9.58402	NCIH2170	Lung Cancer	Lung	NSCLC
ACH-000482	9.09011	RERFLCKJ	Lung Cancer	Lung	NSCLC
ACH-000483	9.55246	SNU182	Liver Cancer	Liver	Hepatocellular Carcinoma
ACH-000484	8.50573	VMRCRCW	Kidney Cancer	Kidney	Renal Cell Carcinoma
ACH-000485	9.1151	GSU	Gastric Cancer	Gastric	Gastric Adenocarcinoma
ACH-000486	9.52814	KU1919	Bladder Cancer	Urinary Tract	Bladder Carcinoma
ACH-000487	8.00692	F36P	Leukemia	Blood	AML
ACH-000488	9.43423	TE11	Esophageal Cancer	Esophagus	Esophagus Squamous
ACH-000489	8.77056	SW1116	Colon/Colorectal Cancer	Colorectal	Colorectal Adenocarcinoma
ACH-000490	9.58308	SF767	Cervical Cancer	Cervix	Cervical Squamous
ACH-000491	10.1675	NCIH716	Colon/Colorectal Cancer	Colorectal	Colorectal Adenocarcinoma
ACH-000492	9.50265	MUTZ5	Leukemia	Blood	ALL
ACH-000493	9.75792	SNU423	Liver Cancer	Liver	Hepatocellular Carcinoma
ACH-000494	9.61506	OELE	Non-Cancerous	Ovary
ACH-000495	8.8116	TUHR4TKB	Kidney Cancer	Kidney	Renal Cell Carcinoma
ACH-000496	9.34018	NCIH1792	Lung Cancer	Lung	NSCLC
ACH-000498	9.55219	KO52	Leukemia	Blood	AML
ACH-000499	10.0304	EW8	Bone Cancer	Bone	Ewing Sarcoma
ACH-000500	9.59625	SNU46	Head and Neck Cancer	Upper Aerodigestive	Upper Aerodigestive Squamous
ACH-000501	9.51562	LS123	Colon/Colorectal Cancer	Colorectal	Colorectal Adenocarcinoma
ACH-000502	9.129	TCCPAN2	Pancreatic Cancer	Pancreas	Exocrine
ACH-000503	8.3102	BICR16	Head and Neck Cancer	Upper Aerodigestive	Upper Aerodigestive Squamous
ACH-000504	9.63599	SNB75	Brain Cancer	Central Nervous System	Glioma
ACH-000505	9.89415	RKN	Sarcoma	Soft Tissue	Leiomyosarcoma
ACH-000506	10.2389	NCIH146	Lung Cancer	Lung	SCLC
ACH-000507	9.03524	KE39	Gastric Cancer	Gastric	Gastric Adenocarcinoma
ACH-000508	10.3917	CORL88	Lung Cancer	Lung	SCLC
ACH-000509	10.4738	HUT78	Lymphoma	Lymphocyte	Non Hodgkin Lymphoma
ACH-000510	9.3287	NCIH1299	Lung Cancer	Lung	NSCLC
ACH-000511	9.77914	CALU1	Lung Cancer	Lung	NSCLC
ACH-000512	8.67027	INA6	Myeloma	Plasma Cell	Multiple Myeloma
ACH-000513	8.61938	SNU1272	Kidney Cancer	Kidney	Renal Cell Carcinoma
ACH-000514	10.6108	NCIH1092	Lung Cancer	Lung	SCLC
ACH-000515	10.286	HCC33	Lung Cancer	Lung	SCLC
ACH-000516	10.0954	CAL78	Bone Cancer	Bone	Chondrosarcoma
ACH-000517	9.9265	SNU410	Pancreatic Cancer	Pancreas	Exocrine
ACH-000518	9.31238	CAL33	Head and Neck Cancer	Upper Aerodigestive	Upper Aerodigestive Squamous
ACH-000519	10.5035	PEER	Leukemia	Blood	ALL
ACH-000520	9.03075	59M	Ovarian Cancer	Ovary	Ovary Adenocarcinoma
ACH-000521	9.44847	NCIH2030	Lung Cancer	Lung	NSCLC
ACH-000522	9.4672	UMUC3	Bladder Cancer	Urinary Tract	Bladder Carcinoma
ACH-000523	10.7174	NCIH1184	Lung Cancer	Lung	SCLC
ACH-000524	8.50363	KURAMOCHI	Ovarian Cancer	Ovary	Ovary Adenocarcinoma
ACH-000525	10.0493	NCIH2171	Lung Cancer	Lung	SCLC
ACH-000526	8.61066	HS821T	Non-Cancerous	Fibroblast	Fibroblast Bone
ACH-000527	8.97897	OVISE	Ovarian Cancer	Ovary	Ovary Adenocarcinoma
ACH-000528	9.9993	ABC1	Lung Cancer	Lung	NSCLC
ACH-000529	8.49249	T173	Non-Cancerous	Fibroblast	Fibroblast Bone
ACH-000530	9.89238	DMS114	Lung Cancer	Lung	SCLC
ACH-000531	8.15896	RS5	Non-Cancerous	Fibroblast	Fibroblast Lung
ACH-000532	9.39705	SNU61	Colon/Colorectal Cancer	Colorectal	Colorectal Adenocarcinoma
ACH-000533	9.12632	NCIH2004RT	Rhabdoid	Soft Tissue	Malignant Rhabdoid Tumor
ACH-000534	8.77149	WSUDLCL2	Lymphoma	Lymphocyte	Non Hodgkin Lymphoma
ACH-000535	9.29864	BXPC3	Pancreatic Cancer	Pancreas	Exocrine
ACH-000536	9.72491	BT20	Breast Cancer	Breast	Breast Ductal Carcinoma
ACH-000537	9.12825	SNU761	Liver Cancer	Liver	Hepatocellular Carcinoma
ACH-000538	9.79131	HUTU80	Gastric Cancer	Gastric	Duodenal Adenocarcinoma
ACH-000539	9.15934	HS618T	Non-Cancerous	Fibroblast	Fibroblast Lung
ACH-000540	8.92202	HS606T	Non-Cancerous	Fibroblast	Fibroblast Breast
ACH-000541	9.7025	KMS34	Myeloma	Plasma Cell	Multiple Myeloma
ACH-000542	9.63757	HEYA8	Ovarian Cancer	Ovary	Ovary Adenocarcinoma
ACH-000543	8.9714	SNU489	Brain Cancer	Central Nervous System	Glioma
ACH-000544	8.69432	OE21	Esophageal Cancer	Esophagus	Esophagus Squamous
ACH-000545	9.05202	VMCUB1	Bladder Cancer	Urinary Tract	Bladder Carcinoma
ACH-000546	9.34199	HSC4	Head and Neck Cancer	Upper Aerodigestive	Upper Aerodigestive Squamous
ACH-000547	8.91421	HT1197	Bladder Cancer	Urinary Tract	Bladder Carcinoma
ACH-000548	9.14509	BHY	Head and Neck Cancer	Upper Aerodigestive	Upper Aerodigestive Squamous
ACH-000549	8.65621	SNU1076	Head and Neck Cancer	Upper Aerodigestive	Upper Aerodigestive Squamous
ACH-000550	9.41316	IGR39	Skin Cancer	Skin	Melanoma
ACH-000551	8.95989	K562	Leukemia	Blood	CML
ACH-000552	9.8833	HT29	Colon/Colorectal Cancer	Colorectal	Colorectal Adenocarcinoma
ACH-000553	9.76192	SQ1	Lung Cancer	Lung	NSCLC
ACH-000554	9.46734	UACC893	Breast Cancer	Breast	Breast Ductal Carcinoma
ACH-000555	9.37665	A498	Kidney Cancer	Kidney	Renal Cell Carcinoma
ACH-000556	9.85703	SIHA	Cervical Cancer	Cervix	Cervical Carcinoma
ACH-000557	10.0669	AML193	Leukemia	Blood	AML
ACH-000558	9.92255	A172	Brain Cancer	Central Nervous System	Glioma
ACH-000559	10.0185	NCIH1836	Lung Cancer	Lung	SCLC
ACH-000560	9.97699	ECC10	Gastric Cancer	Gastric	Gastric Small Cell
ACH-000561	8.7237	TDOTT	Esophageal Cancer	Esophagus	Esophagus Squamous
ACH-000562	9.74396	HCC78	Lung Cancer	Lung	NSCLC
ACH-000563	10.1523	EBC1	Lung Cancer	Lung	NSCLC
ACH-000564	9.20692	KHM1B	Myeloma	Plasma Cell	Multiple Myeloma
ACH-000565	8.47135	RCM1	Colon/Colorectal Cancer	Colorectal	Colorectal Adenocarcinoma
ACH-000566	9.11205	SW1710	Bladder Cancer	Urinary Tract	Bladder Carcinoma
ACH-000567	10.5507	ST486	Lymphoma	Lymphocyte	Non Hodgkin Lymphoma
ACH-000568	9.33762	UACC812	Breast Cancer	Breast	Breast Ductal Carcinoma
ACH-000569	9.44528	ISTMES1	Lung Cancer	Lung	Mesothelioma
ACH-000570	9.96967	YKG1	Brain Cancer	Central Nervous System	Glioma
ACH-000571	9.54514	T98G	Brain Cancer	Central Nervous System	Glioma
ACH-000572	9.75995	G361	Skin Cancer	Skin	Melanoma
ACH-000573	9.66865	MDAMB436	Breast Cancer	Breast	Breast Carcinoma
ACH-000574	9.13003	FUOV1	Ovarian Cancer	Ovary	Ovary Adenocarcinoma
ACH-000575	9.57935	HCC364	Lung Cancer	Lung	NSCLC
ACH-000576	8.8276	KMS27	Myeloma	Plasma Cell	Multiple Myeloma
ACH-000577	9.39182	JHH2	Liver Cancer	Liver	Hepatocellular Carcinoma
ACH-000578	9.67497	HCC1171	Lung Cancer	Lung	NSCLC
ACH-000579	9.73588	UACC257	Skin Cancer	Skin	Melanoma
ACH-000580	9.02663	C32	Skin Cancer	Skin	Melanoma
ACH-000581	9.07596	SNU16	Gastric Cancer	Gastric	Gastric Adenocarcinoma
ACH-000582	9.57478	COLO741	Skin Cancer	Skin	Melanoma
ACH-000583	10.0114	MC116	Lymphoma	Lymphocyte	Non Hodgkin Lymphoma
ACH-000584	9.25337	JHOS4	Ovarian Cancer	Ovary	Ovary Adenocarcinoma
ACH-000585	9.44317	EPLC272H	Lung Cancer	Lung	NSCLC
ACH-000586	10.0926	NCIH1876	Lung Cancer	Lung	SCLC
ACH-000587	9.55676	NCIH1975	Lung Cancer	Lung	NSCLC
ACH-000588	9.00706	KMS26	Myeloma	Plasma Cell	Multiple Myeloma
ACH-000589	9.32814	NCIH1437	Lung Cancer	Lung	NSCLC
ACH-000590	8.9321	NCIH2073	Lung Cancer	Lung	NSCLC
ACH-000591	9.85255	LN235	Brain Cancer	Central Nervous System	Glioma
ACH-000592	9.55155	TM31	Brain Cancer	Central Nervous System	Glioma
ACH-000593	9.6767	BC3C	Bladder Cancer	Urinary Tract	Bladder Carcinoma
ACH-000594	10.3507	DMS153	Lung Cancer	Lung	SCLC
ACH-000595	10.1663	LN229	Brain Cancer	Central Nervous System	Glioma
ACH-000596	9.29464	LCLC97TM1	Lung Cancer	Lung	NSCLC
ACH-000597	10.3203	TTC709	Rhabdoid	Soft Tissue	Malignant Rhabdoid Tumor
ACH-000598	9.0709	KMS21BM	Myeloma	Plasma Cell	Multiple Myeloma
ACH-000599	9.981	PATU8902	Pancreatic Cancer	Pancreas	Exocrine
ACH-000600	9.26374	SLR26	Kidney Cancer	Kidney	Renal Cell Carcinoma
ACH-000601	9.57242	MIAPACA2	Pancreatic Cancer	Pancreas	Exocrine
ACH-000602	9.81195	M07E	Leukemia	Blood	AML
ACH-000603	9.26969	BEN	Lung Cancer	Lung	NSCLC
ACH-000604	8.66313	KYO1	Leukemia	Blood	CML
ACH-000605	9.67666	TE6	Esophageal Cancer	Esophagus	Esophagus Squamous
ACH-000606	9.17218	PECAPJ34CLONEC12	Head and Neck Cancer	Upper Aerodigestive	Upper Aerodigestive Squamous
ACH-000607	9.86658	KYM1	Rhabdoid	Soft Tissue	Malignant Rhabdoid Tumor
ACH-000608	9.21364	COV644	Ovarian Cancer	Ovary	Ovary Adenocarcinoma
ACH-000609	9.83878	SF126	Brain Cancer	Central Nervous System	Glioma
ACH-000610	9.85166	NCIH2227	Lung Cancer	Lung	SCLC
ACH-000611	10.0629	SUDHL6	Lymphoma	Lymphocyte	Non Hodgkin Lymphoma
ACH-000612	9.58184	HUT102	Lymphoma	Lymphocyte	Lymphoma Unspecified
ACH-000613	10.0753	HOS	Bone Cancer	Bone	Osteosarcoma
ACH-000614	9.24446	RVH421	Skin Cancer	Skin	Melanoma
ACH-000615	9.20667	SKMEL28	Skin Cancer	Skin	Melanoma
ACH-000616	9.89321	HS746T	Gastric Cancer	Gastric	Gastric Adenocarcinoma
ACH-000617	9.35275	OVCAR4	Ovarian Cancer	Ovary	Ovary Adenocarcinoma
ACH-000618	8.93428	SNU1041	Head and Neck Cancer	Upper Aerodigestive	Upper Aerodigestive Squamous
ACH-000619	9.03985	PECAPJ15	Head and Neck Cancer	Upper Aerodigestive	Upper Aerodigestive Squamous
ACH-000620	8.83883	JHH1	Liver Cancer	Liver	Hepatocellular Carcinoma
ACH-000621	9.79609	MDAMB157	Breast Cancer	Breast	Breast Ductal Carcinoma
ACH-000622	10.3501	KNS42	Brain Cancer	Central Nervous System	Glioma
ACH-000623	9.33539	SNU201	Brain Cancer	Central Nervous System	Glioma
ACH-000624	8.54415	HCC1806	Breast Cancer	Breast	Breast Ductal Carcinoma
ACH-000625	10.1636	HEP3B217	Liver Cancer	Liver	Hepatocellular Carcinoma
ACH-000626	10.6099	U266B1	Myeloma	Plasma Cell	Multiple Myeloma
ACH-000627	9.17869	LCLC103H	Lung Cancer	Lung	NSCLC
ACH-000628	9.83215	NCIH596	Lung Cancer	Lung	NSCLC
ACH-000629	9.81461	IOMMLEE	Brain Cancer	Central Nervous System	Meningioma
ACH-000630	9.31895	YD8	Head and Neck Cancer	Upper Aerodigestive	Upper Aerodigestive Squamous
ACH-000631	9.85451	KS1	Brain Cancer	Central Nervous System	Glioma
ACH-000632	9.43759	HS944T	Skin Cancer	Skin	Melanoma
ACH-000633	9.48842	FU97	Gastric Cancer	Gastric	Gastric Adenocarcinoma
ACH-000634	9.94977	LN340	Brain Cancer	Central Nervous System	Glioma
ACH-000635	9.9747	SNU119	Ovarian Cancer	Ovary	Ovary Adenocarcinoma
ACH-000636	9.52388	RPMI8402	Leukemia	Blood	ALL
ACH-000637	9.66697	KYSE520	Esophageal Cancer	Esophagus	Esophagus Squamous
ACH-000638	9.25084	NCIH441	Lung Cancer	Lung	NSCLC
ACH-000639	10.4165	NCIH211	Lung Cancer	Lung	SCLC
ACH-000640	9.72802	SKMEL31	Skin Cancer	Skin	Melanoma
ACH-000641	9.59096	CMK	Leukemia	Blood	AML
ACH-000642	8.94298	HMEL	Non-Cancerous	Breast
ACH-000643	8.75676	HDQP1	Breast Cancer	Breast	Breast Ductal Carcinoma
ACH-000644	9.27426	COLO829	Skin Cancer	Skin	Melanoma
ACH-000645	8.89782	JL1	Lung Cancer	Lung	Mesothelioma
ACH-000646	7.7211	OVMANA	Ovarian Cancer	Ovary	Ovary Adenocarcinoma
ACH-000647	10.0474	TE1	Esophageal Cancer	Esophagus	Esophagus Squamous
ACH-000648	9.5366	NCIH28	Lung Cancer	Lung	Mesothelioma
ACH-000649	9.59012	786O	Kidney Cancer	Kidney	Renal Cell Carcinoma
ACH-000650	9.88672	IGR37	Skin Cancer	Skin	Melanoma
ACH-000651	10.2963	SW620	Colon/Colorectal Cancer	Colorectal	Colorectal Adenocarcinoma
ACH-000652	9.90895	SUIT2	Pancreatic Cancer	Pancreas	Exocrine
ACH-000653	9.8658	JJN3	Myeloma	Plasma Cell	Multiple Myeloma
ACH-000654	10.1862	RAJI	Lymphoma	Lymphocyte	Non Hodgkin Lymphoma
ACH-000655	9.15145	SF268	Brain Cancer	Central Nervous System	Glioma
ACH-000656	9.48297	SUDHL8	Lymphoma	Lymphocyte	Non Hodgkin Lymphoma
ACH-000657	10.0444	A2780	Ovarian Cancer	Ovary	Ovary Adenocarcinoma
ACH-000659	9.51491	SCLC21H	Lung Cancer	Lung	SCLC
ACH-000660	10.102	SUDHL5	Lymphoma	Lymphocyte	Non Hodgkin Lymphoma
ACH-000661	9.82853	WM1799	Skin Cancer	Skin	Melanoma
ACH-000662	9.23475	CORL23	Lung Cancer	Lung	NSCLC
ACH-000663	8.97091	OVTOKO	Ovarian Cancer	Ovary	Ovary Adenocarcinoma
ACH-000664	9.49711	SUDHL1	Lymphoma	Lymphocyte	Non Hodgkin Lymphoma
ACH-000665	9.81895	SKMES1	Lung Cancer	Lung	NSCLC
ACH-000666	9.52393	NCIH1355	Lung Cancer	Lung	NSCLC
ACH-000667	8.69919	HCC44	Lung Cancer	Lung	NSCLC
ACH-000668	9.91582	HCC70	Breast Cancer	Breast	Breast Ductal Carcinoma
ACH-000669	9.70158	SW900	Lung Cancer	Lung	NSCLC
ACH-000670	9.09241	SBC5	Lung Cancer	Lung	SCLC
ACH-000671	9.40767	HUH6	Liver Cancer	Liver	Hepatoblastoma
ACH-000672	8.82728	IALM	Lung Cancer	Lung	NSCLC
ACH-000673	9.91045	LN443	Brain Cancer	Central Nervous System	Glioma
ACH-000674	9.24543	NUGC4	Gastric Cancer	Gastric	Gastric Adenocarcinoma
ACH-000675	9.8167	NCIH1734	Lung Cancer	Lung	NSCLC
ACH-000676	9.70209	LN464	Brain Cancer	Central Nervous System	Glioma
ACH-000677	9.6092	SW1573	Lung Cancer	Lung	NSCLC
ACH-000678	9.55524	MKN7	Gastric Cancer	Gastric	Gastric Adenocarcinoma
ACH-000679	8.80116	OE19	Esophageal Cancer	Esophagus	Esophagus Squamous
ACH-000680	9.21958	SW948	Colon/Colorectal Cancer	Colorectal	Colorectal Adenocarcinoma
ACH-000681	9.72729	A549	Lung Cancer	Lung	NSCLC
ACH-000682	8.79009	SNU1066	Head and Neck Cancer	Upper Aerodigestive	Upper Aerodigestive Squamous
ACH-000683	9.56266	SNU503	Colon/Colorectal Cancer	Colorectal	Colorectal Adenocarcinoma
ACH-000684	9.43848	KMRC1	Kidney Cancer	Kidney	Renal Cell Carcinoma
ACH-000685	9.30042	L33	Pancreatic Cancer	Pancreas	Exocrine
ACH-000686	9.15145	SNU878	Liver Cancer	Liver	Hepatocellular Carcinoma
ACH-000687	10.1708	CI1	Lymphoma	Lymphocyte	Non Hodgkin Lymphoma
ACH-000688	9.25385	OV7	Ovarian Cancer	Ovary	Ovary Adenocarcinoma
ACH-000689	8.54909	RH18	Sarcoma	Soft Tissue	Rhabdomyosarcoma
ACH-000690	9.76645	HCC2814	Lung Cancer	Lung	NSCLC
ACH-000691	9.35551	HCC2157	Breast Cancer	Breast	Breast Ductal Carcinoma
ACH-000692	8.89023	SNU899	Head and Neck Cancer	Upper Aerodigestive	Upper Aerodigestive Squamous
ACH-000693	10.1334	KYSE180	Esophageal Cancer	Esophagus	Esophagus Squamous
ACH-000694	9.61291	TE9	Esophageal Cancer	Esophagus	Esophagus Squamous
ACH-000695	9.71191	CORL47	Lung Cancer	Lung	SCLC
ACH-000696	9.69169	OVCAR8	Ovarian Cancer	Ovary	Ovary Adenocarcinoma
ACH-000697	8.82601	A3KAW	Lymphoma	Lymphocyte	Non Hodgkin Lymphoma
ACH-000698	9.99619	DMS53	Lung Cancer	Lung	SCLC
ACH-000699	9.33526	HCC1395	Breast Cancer	Breast	Breast Ductal Carcinoma
ACH-000700	10.1927	NCIH2882	Lung Cancer	Lung	NSCLC
ACH-000701	9.35231	RMUGS	Ovarian Cancer	Ovary	Ovary Adenocarcinoma
ACH-000702	9.98442	L1236	Lymphoma	Lymphocyte	Hodgkin Lymphoma
ACH-000703	10.3261	DMS79	Lung Cancer	Lung	SCLC
ACH-000704	8.83835	OAW42	Ovarian Cancer	Ovary	Ovary Carcinoma
ACH-000705	9.55301	LC1F	Lung Cancer	Lung	NSCLC
ACH-000706	9.21798	EKVX	Lung Cancer	Lung	NSCLC
ACH-000707	10.3132	P3HR1	Lymphoma	Lymphocyte	Non Hodgkin Lymphoma
ACH-000708	9.69082	SNU283	Colon/Colorectal Cancer	Colorectal	Colorectal Adenocarcinoma
ACH-000709	8.86196	KMRC2	Kidney Cancer	Kidney	Renal Cell Carcinoma
ACH-000710	8.88078	NCIH854	Lung Cancer	Lung	NSCLC
ACH-000711	9.2534	JIMT1	Breast Cancer	Breast	Breast Ductal Carcinoma
ACH-000712	9.70996	HCC1833	Lung Cancer	Lung	NSCLC
ACH-000713	8.94881	CAOV3	Ovarian Cancer	Ovary	Ovary Adenocarcinoma
ACH-000714	9.94401	KMS11	Myeloma	Plasma Cell	Multiple Myeloma
ACH-000715	9.2556	SNU1214	Head and Neck Cancer	Upper Aerodigestive	Upper Aerodigestive Squamous
ACH-000716	9.79072	TT2609C02	Thyroid Cancer	Thyroid	Thyroid Carcinoma
ACH-000717	8.91779	COLO680N	Esophageal Cancer	Esophagus	Esophagus Squamous
ACH-000718	9.27789	NCIH2291	Lung Cancer	Lung	NSCLC
ACH-000719	8.59898	RMGI	Ovarian Cancer	Ovary	Ovary Adenocarcinoma
ACH-000720	9.03587	TCCSUP	Bladder Cancer	Urinary Tract	Bladder Carcinoma
ACH-000721	9.63405	HMC18	Breast Cancer	Breast	Breast Carcinoma
ACH-000722	9.51406	SNUC1	Colon/Colorectal Cancer	Colorectal	Colorectal Adenocarcinoma
ACH-000723	9.12083	YD10B	Head and Neck Cancer	Upper Aerodigestive	Upper Aerodigestive Squamous
ACH-000724	9.87805	HT1376	Bladder Cancer	Urinary Tract	Bladder Carcinoma
ACH-000725	9.6937	HCC202	Breast Cancer	Breast	Breast Ductal Carcinoma
ACH-000726	9.31334	TE14	Esophageal Cancer	Esophagus	Esophagus Squamous
ACH-000728	9.52668	KASUMI2	Leukemia	Blood	ALL
ACH-000729	10.3883	NCIH1963	Lung Cancer	Lung	SCLC
ACH-000730	9.66142	SKMEL5	Skin Cancer	Skin	Melanoma
ACH-000731	9.41528	HCC2279	Lung Cancer	Lung	NSCLC
ACH-000732	8.48253	PECAPJ41CLONED2	Head and Neck Cancer	Upper Aerodigestive	Upper Aerodigestive Squamous
ACH-000733	9.44886	NCIH1838	Lung Cancer	Lung	NSCLC
ACH-000734	9.91631	JHH5	Liver Cancer	Liver	Hepatocellular Carcinoma
ACH-000735	8.94691	PECAPJ49	Head and Neck Cancer	Upper Aerodigestive	Upper Aerodigestive Squamous
ACH-000736	9.90489	SNU601	Gastric Cancer	Gastric	Gastric Adenocarcinoma
ACH-000737	9.66956	NCIH1385	Lung Cancer	Lung	NSCLC
ACH-000738	10.63	GB1	Brain Cancer	Central Nervous System	Glioma
ACH-000739	8.96012	HEPG2	Liver Cancer	Liver	Hepatocellular Carcinoma
ACH-000740	9.65064	A253	Head and Neck Cancer	Upper Aerodigestive	Upper Aerodigestive Squamous
ACH-000741	9.20984	UBLC1	Bladder Cancer	Urinary Tract	Bladder Carcinoma
ACH-000742	8.28086	DM3	Non-Cancerous	Fibroblast	Fibroblast Lung
ACH-000743	9.88403	CORL95	Lung Cancer	Lung	SCLC
ACH-000744	9.67396	NCIH1623	Lung Cancer	Lung	NSCLC
ACH-000745	8.90989	MOLP8	Myeloma	Plasma Cell	Multiple Myeloma
ACH-000746	9.90881	GSS	Gastric Cancer	Gastric	Gastric Adenocarcinoma
ACH-000747	10.0007	NCIH1703	Lung Cancer	Lung	NSCLC
ACH-000748	10.0772	SJSA1	Bone Cancer	Bone	Osteosarcoma
ACH-000749	9.22918	DMS273	Lung Cancer	Lung	SCLC
ACH-000750	9.46838	LOXIMVI	Skin Cancer	Skin	Melanoma
ACH-000751	8.8535	OCIM1	Leukemia	Blood	AML
ACH-000752	9.84613	NCIH196	Lung Cancer	Lung	SCLC
ACH-000753	9.78873	JMSU1	Bladder Cancer	Urinary Tract	Bladder Carcinoma
ACH-000754	9.43319	L428	Lymphoma	Lymphocyte	Hodgkin Lymphoma
ACH-000755	8.81698	HCC2218	Breast Cancer	Breast	Breast Ductal Carcinoma
ACH-000756	10.121	GI1	Brain Cancer	Central Nervous System	Glioma
ACH-000757	9.28677	A427	Lung Cancer	Lung	NSCLC
ACH-000758	9.0387	MKN74	Gastric Cancer	Gastric	Gastric Adenocarcinoma
ACH-000759	8.95289	MDAMB175VII	Breast Cancer	Breast	Breast Ductal Carcinoma
ACH-000760	10.1413	LNZ308	Brain Cancer	Central Nervous System	Glioma
ACH-000761	8.93534	NUGC2	Gastric Cancer	Gastric	Gastric Adenocarcinoma
ACH-000762	9.21213	YD38	Head and Neck Cancer	Upper Aerodigestive	Upper Aerodigestive Squamous
ACH-000763	9.68422	MM1S	Myeloma	Plasma Cell	Multiple Myeloma
ACH-000764	9.61782	SH10TC	Gastric Cancer	Gastric	Gastric Adenocarcinoma
ACH-000765	9.92582	WM983B	Skin Cancer	Skin	Melanoma
ACH-000766	9.4324	NCIH1648	Lung Cancer	Lung	NSCLC
ACH-000767	10.3026	NCIH526	Lung Cancer	Lung	SCLC
ACH-000768	9.56628	MDAMB231	Breast Cancer	Breast	Breast Carcinoma
ACH-000769	9.81452	LK2	Lung Cancer	Lung	NSCLC
ACH-000770	9.33709	P31FUJ	Leukemia	Blood	AML
ACH-000771	7.18031	BICR56	Head and Neck Cancer	Upper Aerodigestive	Upper Aerodigestive Squamous
ACH-000772	9.71805	TE441T	Sarcoma	Soft Tissue	Rhabdomyosarcoma
ACH-000773	9.5841	KIJK	Lymphoma	Lymphocyte	Non Hodgkin Lymphoma
ACH-000774	9.02497	RERFLCAD2	Lung Cancer	Lung	NSCLC
ACH-000775	9.49641	NCIH727	Lung Cancer	Lung	Lung Carcinoid
ACH-000776	9.3289	ONS76	Brain Cancer	Central Nervous System	Medulloblastoma
ACH-000777	8.41261	KYSE30	Esophageal Cancer	Esophagus	Esophagus Squamous
ACH-000778	9.59945	HSC3	Head and Neck Cancer	Upper Aerodigestive	Upper Aerodigestive Squamous
ACH-000779	9.53216	PC9	Lung Cancer	Lung	NSCLC
ACH-000780	10.4586	NCIH1105	Lung Cancer	Lung	SCLC
ACH-000781	9.68512	NCIH2023	Lung Cancer	Lung	NSCLC
ACH-000782	9.64519	SEM	Leukemia	Blood	ALL
ACH-000783	9.65868	CAMA1	Breast Cancer	Breast	Breast Carcinoma
ACH-000784	8.95329	KYSE70	Esophageal Cancer	Esophagus	Esophagus Squamous
ACH-000785	8.9935	NCIH2126	Lung Cancer	Lung	NSCLC
ACH-000786	9.79692	DAUDI	Lymphoma	Lymphocyte	Non Hodgkin Lymphoma
ACH-000787	8.88429	LXF289	Lung Cancer	Lung	NSCLC
ACH-000788	10.0772	A2058	Skin Cancer	Skin	Melanoma
ACH-000789	10.5334	NCIH810	Lung Cancer	Lung	NSCLC
ACH-000790	10.3039	SHP77	Lung Cancer	Lung	SCLC
ACH-000791	9.57463	RERFLCAD1	Lung Cancer	Lung	NSCLC
ACH-000792	8.44332	BFTC909	Kidney Cancer	Kidney	Renal Cell Carcinoma
ACH-000793	9.63526	KATOIII	Gastric Cancer	Gastric	Gastric Adenocarcinoma
ACH-000794	7.38422	BICR22	Head and Neck Cancer	Upper Aerodigestive	Upper Aerodigestive Squamous
ACH-000796	9.46044	MCAS	Ovarian Cancer	Ovary	Ovary Adenocarcinoma
ACH-000797	8.9295	HLFA	Non-Cancerous	Fibroblast	Fibroblast Lung
ACH-000798	8.72294	CL40	Colon/Colorectal Cancer	Colorectal	Colorectal Adenocarcinoma
ACH-000799	9.89949	HS695T	Skin Cancer	Skin	Melanoma
ACH-000800	9.84787	NCIH446	Lung Cancer	Lung	SCLC
ACH-000801	9.52087	HS936T	Skin Cancer	Skin	Melanoma
ACH-000802	9.48119	BFTC905	Bladder Cancer	Urinary Tract	Bladder Carcinoma
ACH-000803	10.1635	COLO668	Lung Cancer	Lung	SCLC
ACH-000804	10.5438	NB1	Neuroblastoma	Peripheral Nervous System	Neuroblastoma
ACH-000805	9.86256	COLO679	Skin Cancer	Skin	Melanoma
ACH-000806	8.99772	L540	Lymphoma	Lymphocyte	Hodgkin Lymphoma
ACH-000807	9.43091	SNU738	Brain Cancer	Central Nervous System	Glioma
ACH-000808	8.85537	HUH28	Bile Duct Cancer	Bile Duct	Cholangiocarcinoma
ACH-000809	9.79721	KYSE410	Esophageal Cancer	Esophagus	Esophagus Squamous
ACH-000810	9.64156	SKMEL30	Skin Cancer	Skin	Melanoma
ACH-000811	9.45629	SKOV3	Ovarian Cancer	Ovary	Ovary Adenocarcinoma
ACH-000812	9.60188	COLO783	Skin Cancer	Skin	Melanoma
ACH-000813	8.9295	T3M10	Lung Cancer	Lung	NSCLC
ACH-000814	10.1693	HS939T	Skin Cancer	Skin	Melanoma
ACH-000815	8.9642	KMH2	Lymphoma	Lymphocyte	Hodgkin Lymphoma
ACH-000816	9.93555	NCIH524	Lung Cancer	Lung	SCLC
ACH-000817	9.77763	RPMI8226	Myeloma	Plasma Cell	Multiple Myeloma
ACH-000818	9.28119	BT483	Breast Cancer	Breast	Breast Ductal Carcinoma
ACH-000819	10.0052	LN18	Brain Cancer	Central Nervous System	Glioma
ACH-000820	9.70089	SW403	Colon/Colorectal Cancer	Colorectal	Colorectal Adenocarcinoma
ACH-000821	8.83172	EJM	Myeloma	Plasma Cell	Multiple Myeloma
ACH-000822	9.07751	SKMEL24	Skin Cancer	Skin	Melanoma
ACH-000823	10.281	KYSE140	Esophageal Cancer	Esophagus	Esophagus Squamous
ACH-000824	9.6827	KYSE510	Esophageal Cancer	Esophagus	Esophagus Squamous
ACH-000825	9.02555	HOP92	Lung Cancer	Lung	NSCLC
ACH-000826	9.6506	CAL12T	Lung Cancer	Lung	NSCLC
ACH-000827	9.94067	WM793	Skin Cancer	Skin	Melanoma
ACH-000828	9.40361	ZR7530	Breast Cancer	Breast	Breast Ductal Carcinoma
ACH-000829	10.0565	HUNS1	Myeloma	Plasma Cell	Multiple Myeloma
ACH-000830	10.4617	NCIH1436	Lung Cancer	Lung	SCLC
ACH-000831	9.55013	HEC50B	Endometrial/Uterine Cancer	Uterus	Endometrial Adenocarcinoma
ACH-000832	9.47141	CAL27	Head and Neck Cancer	Upper Aerodigestive	Upper Aerodigestive Squamous
ACH-000833	9.33213	RH30	Sarcoma	Soft Tissue	Rhabdomyosarcoma
ACH-000834	8.48519	UMUC1	Bladder Cancer	Urinary Tract	Bladder Carcinoma
ACH-000835	9.66747	GCT	Sarcoma	Soft Tissue	Pleomorphic Sarcoma
ACH-000836	9.36696	YD15	Head and Neck Cancer	Upper Aerodigestive	Upper Aerodigestive Squamous
ACH-000837	9.94559	NCIH322	Lung Cancer	Lung	NSCLC
ACH-000838	9.61956	AMO1	Myeloma	Plasma Cell	Multiple Myeloma
ACH-000839	8.96541	SCABER	Bladder Cancer	Urinary Tract	Bladder Carcinoma
ACH-000840	10.1009	HCC366	Lung Cancer	Lung	NSCLC
ACH-000841	9.87644	NCIH2087	Lung Cancer	Lung	NSCLC
ACH-000842	9.32299	SW480	Colon/Colorectal Cancer	Colorectal	Colorectal Adenocarcinoma
ACH-000843	10.036	HARA	Lung Cancer	Lung	NSCLC
ACH-000844	9.20107	DMS454	Lung Cancer	Lung	SCLC
ACH-000845	9.09001	NCIH1373	Lung Cancer	Lung	NSCLC
ACH-000846	9.6872	FADU	Head and Neck Cancer	Upper Aerodigestive	Upper Aerodigestive Squamous
ACH-000847	10.1317	HGC27	Gastric Cancer	Gastric	Gastric Adenocarcinoma
ACH-000848	9.95083	JHH7	Liver Cancer	Liver	Hepatocellular Carcinoma
ACH-000849	10.2221	MDAMB468	Breast Cancer	Breast	Breast Carcinoma
ACH-000850	8.59831	HS698T	Non-Cancerous	Fibroblast	Fibroblast Colorectal
ACH-000851	9.14616	MORCPR	Lung Cancer	Lung	NSCLC
ACH-000852	9.52855	NCIH1435	Lung Cancer	Lung	NSCLC
ACH-000853	9.66603	NCIH661	Lung Cancer	Lung	NSCLC
ACH-000854	8.0162	OCIMY5	Myeloma	Plasma Cell	Multiple Myeloma
ACH-000855	9.08828	KYSE150	Esophageal Cancer	Esophagus	Esophagus Squamous
ACH-000856	9.92156	CAL51	Breast Cancer	Breast	Breast Carcinoma
ACH-000857	8.90872	CAL851	Breast Cancer	Breast	Breast Carcinoma
ACH-000858	8.8748	KNS62	Lung Cancer	Lung	NSCLC
ACH-000859	10.0364	HCC1954	Breast Cancer	Breast	Breast Ductal Carcinoma
ACH-000860	9.83135	NCIH358	Lung Cancer	Lung	NSCLC
ACH-000861	9.57526	HOP62	Lung Cancer	Lung	NSCLC
ACH-000862	9.27132	KMBC2	Bladder Cancer	Urinary Tract	Bladder Carcinoma
ACH-000863	9.0362	DBTRG05MG	Brain Cancer	Central Nervous System	Glioma
ACH-000864	9.88412	COLO684	Endometrial/Uterine Cancer	Uterus	Endometrial Adenocarcinoma
ACH-000865	9.68822	KYSE450	Esophageal Cancer	Esophagus	Esophagus Squamous
ACH-000866	10.1412	NCIH1048	Lung Cancer	Lung	SCLC
ACH-000867	9.39131	CHAGOK1	Lung Cancer	Lung	NSCLC
ACH-000868	9.05162	HCC1195	Lung Cancer	Lung	NSCLC
ACH-000869	9.74868	NCIH1568	Lung Cancer	Lung	NSCLC
ACH-000870	10.2021	NCIH1930	Lung Cancer	Lung	SCLC
ACH-000871	9.9382	NCIH510	Lung Cancer	Lung	SCLC
ACH-000872	8.98391	HCC515	Lung Cancer	Lung	NSCLC
ACH-000873	9.35733	KYSE270	Esophageal Cancer	Esophagus	Esophagus Squamous
ACH-000874	7.57917	RS411	Leukemia	Blood	ALL
ACH-000875	9.41301	NCIH2347	Lung Cancer	Lung	NSCLC
ACH-000876	9.34216	MDAMB415	Breast Cancer	Breast	Breast Carcinoma
ACH-000877	8.87925	EB1	Lymphoma	Lymphocyte	Non Hodgkin Lymphoma
ACH-000878	9.5924	HCC15	Lung Cancer	Lung	NSCLC
ACH-000879	9.62352	MFE296	Endometrial/Uterine Cancer	Uterus	Endometrial Adenocarcinoma
ACH-000880	9.80676	AGS	Gastric Cancer	Gastric	Gastric Adenocarcinoma
ACH-000881	10.1445	MELJUSO	Skin Cancer	Skin	Melanoma
ACH-000882	9.38636	IGR1	Skin Cancer	Skin	Melanoma
ACH-000883	9.71115	SW1783	Brain Cancer	Central Nervous System	Glioma
ACH-000884	9.41301	MDAMB435S	Skin Cancer	Skin	Melanoma
ACH-000885	9.14959	TOV21G	Ovarian Cancer	Ovary	Ovary Adenocarcinoma
ACH-000886	9.7284	NCIH2009	Lung Cancer	Lung	NSCLC
ACH-000887	9.51877	SF172	Brain Cancer	Central Nervous System	Glioma
ACH-000888	9.35632	NCIH1793	Lung Cancer	Lung	NSCLC
ACH-000889	10.4949	KMM1	Myeloma	Plasma Cell	Multiple Myeloma
ACH-000890	10.1097	SW1271	Lung Cancer	Lung	SCLC
ACH-000891	9.86161	HCC1438	Lung Cancer	Lung	NSCLC
ACH-000892	9.62458	NCIH1563	Lung Cancer	Lung	NSCLC
ACH-000893	9.71026	NCIH1651	Lung Cancer	Lung	NSCLC
ACH-000894	9.21096	NCIH1869	Lung Cancer	Lung	NSCLC
ACH-000895	9.08433	CL34	Colon/Colorectal Cancer	Colorectal	Colorectal Adenocarcinoma
ACH-000896	9.83924	647V	Bladder Cancer	Urinary Tract	Bladder Carcinoma
ACH-000897	9.86973	FTC238	Thyroid Cancer	Thyroid	Thyroid Carcinoma
ACH-000898	9.13563	SNU719	Gastric Cancer	Gastric	Gastric Adenocarcinoma
ACH-000899	9.65116	WM88	Skin Cancer	Skin	Melanoma
ACH-000900	9.47399	NCIH23	Lung Cancer	Lung	NSCLC
ACH-000901	9.92348	HCC1359	Lung Cancer	Lung	NSCLC
ACH-000902	9.6729	CAL148	Breast Cancer	Breast	Breast Ductal Carcinoma
ACH-000903	9.43592	FTC133	Thyroid Cancer	Thyroid	Thyroid Carcinoma
ACH-000904	10.5735	NCIH2106	Lung Cancer	Lung	NSCLC
ACH-000905	9.44673	5637	Bladder Cancer	Urinary Tract	Bladder Carcinoma
ACH-000906	9.34727	ES2	Ovarian Cancer	Ovary	Ovary Adenocarcinoma
ACH-000907	8.78617	SNU349	Kidney Cancer	Kidney	Renal Cell Carcinoma
ACH-000908	9.24336	SNU520	Gastric Cancer	Gastric	Gastric Adenocarcinoma
ACH-000909	9.71661	JHUEM2	Endometrial/Uterine Cancer	Uterus	Endometrial Adenocarcinoma
ACH-000910	9.78315	MDAMB453	Breast Cancer	Breast	Breast Carcinoma
ACH-000911	10.025	NUGC3	Gastric Cancer	Gastric	Gastric Adenocarcinoma
ACH-000912	10.1041	NCIH2286	Lung Cancer	Lung	SCLC
ACH-000913	9.64856	ESS1	Endometrial/Uterine Cancer	Uterus	Endometrial Stromal Sarcoma
ACH-000914	10.0086	HT	Lymphoma	Lymphocyte	Non Hodgkin Lymphoma
ACH-000915	9.55246	IPC298	Skin Cancer	Skin	Melanoma
ACH-000916	9.15881	NCIH1573	Lung Cancer	Lung	NSCLC
ACH-000917	9.49442	TE4	Esophageal Cancer	Esophagus	Esophagus Squamous
ACH-000918	9.56112	MOLT16	Leukemia	Blood	ALL
ACH-000919	9.40288	IM95	Gastric Cancer	Gastric	Gastric Adenocarcinoma
ACH-000920	9.61091	CMLT1	Leukemia	Blood	CML
ACH-000921	10.0496	NCIH157DM	Lung Cancer	Lung	NSCLC
ACH-000922	9.92647	RCHACV	Leukemia	Blood	ALL
ACH-000923	10.0839	BCP1	Lymphoma	Lymphocyte	Non Hodgkin Lymphoma
ACH-000924	9.58856	NCIH2172	Lung Cancer	Lung	NSCLC
ACH-000925	9.52847	DV90	Lung Cancer	Lung	NSCLC
ACH-000926	9.12213	HT55	Colon/Colorectal Cancer	Colorectal	Colorectal Adenocarcinoma
ACH-000927	10.01	BT474	Breast Cancer	Breast	Breast Ductal Carcinoma
ACH-000928	9.1092	JHUEM1	Endometrial/Uterine Cancer	Uterus	Endometrial Adenocarcinoma
ACH-000929	9.78803	NCIH2110	Lung Cancer	Lung	NSCLC
ACH-000930	9.61657	HCC1569	Breast Cancer	Breast	Breast Carcinoma
ACH-000931	10.6106	HMCB	Skin Cancer	Skin	Melanoma
ACH-000932	9.80391	SNU1	Gastric Cancer	Gastric	Gastric Adenocarcinoma
ACH-000933	9.69263	SNU324	Pancreatic Cancer	Pancreas	Exocrine
ACH-000934	9.93798	MDAMB361	Breast Cancer	Breast	Breast Carcinoma
ACH-000935	8.91839	MDST8	Colon/Colorectal Cancer	Colorectal	Colorectal Adenocarcinoma
ACH-000936	9.01561	EFO27	Ovarian Cancer	Ovary	Ovary Adenocarcinoma
ACH-000937	9.95786	PF382	Leukemia	Blood	ALL
ACH-000938	9.54059	NALM6	Leukemia	Blood	ALL
ACH-000939	9.95118	SKUT1	Sarcoma	Soft Tissue	Leiomyosarcoma
ACH-000940	9.82687	AN3CA	Endometrial/Uterine Cancer	Uterus	Endometrial Adenocarcinoma
ACH-000941	9.4697	HEC1B	Endometrial/Uterine Cancer	Uterus	Endometrial Adenocarcinoma
ACH-000942	9.86665	HPBALL	Leukemia	Blood	ALL
ACH-000943	8.49297	RKO	Colon/Colorectal Cancer	Colorectal	Colorectal Adenocarcinoma
ACH-000944	10.1004	NAMALWA	Lymphoma	Lymphocyte	Non Hodgkin Lymphoma
ACH-000945	8.81218	NCIH650	Lung Cancer	Lung	NSCLC
ACH-000946	9.07986	HEC265	Endometrial/Uterine Cancer	Uterus	Endometrial Adenocarcinoma
ACH-000947	9.69085	OVK18	Ovarian Cancer	Ovary	Ovary Adenocarcinoma
ACH-000948	8.7791	2313287	Gastric Cancer	Gastric	Gastric Adenocarcinoma
ACH-000949	8.95974	TGBC11TKB	Gastric Cancer	Gastric	Gastric Adenocarcinoma
ACH-000950	9.86618	LOVO	Colon/Colorectal Cancer	Colorectal	Colorectal Adenocarcinoma
ACH-000951	9.68587	NCIH2342	Lung Cancer	Lung	NSCLC
ACH-000952	9.61561	MDAPCA2B	Prostate Cancer	Prostate	Prostate Adenocarcinoma
ACH-000953	10.6205	SUPT1	Leukemia	Blood	ALL
ACH-000954	10.1645	HEC1A	Endometrial/Uterine Cancer	Uterus	Endometrial Adenocarcinoma
ACH-000955	9.60186	SNU407	Colon/Colorectal Cancer	Colorectal	Colorectal Adenocarcinoma
ACH-000956	10.0463	22RV1	Prostate Cancer	Prostate	Prostate Adenocarcinoma
ACH-000957	9.43175	LS180	Colon/Colorectal Cancer	Colorectal	Colorectal Adenocarcinoma
ACH-000958	8.9486	SW48	Colon/Colorectal Cancer	Colorectal	Colorectal Adenocarcinoma
ACH-000959	9.24317	SNUC4	Colon/Colorectal Cancer	Colorectal	Colorectal Adenocarcinoma
ACH-000960	10.5465	REH	Leukemia	Blood	ALL
ACH-000961	9.23079	ISHIKAWAHERAKLIO02ER	Endometrial/Uterine Cancer	Uterus	Endometrial Adenocarcinoma
ACH-000962	9.3192	OC314	Ovarian Cancer	Ovary	Ovary Adenocarcinoma
ACH-000963	9.7828	CCK81	Colon/Colorectal Cancer	Colorectal	Colorectal Adenocarcinoma
ACH-000964	9.67214	MOLT3	Leukemia	Blood	ALL
ACH-000965	9.44497	RL952	Endometrial/Uterine Cancer	Uterus	Endometrial Adenosquamous
ACH-000966	9.43442	IGROV1	Ovarian Cancer	Ovary	Ovary Adenocarcinoma
ACH-000967	9.89338	SNUC2A	Colon/Colorectal Cancer	Colorectal	Colorectal Adenocarcinoma
ACH-000968	8.67048	COLO792	Skin Cancer	Skin	Melanoma
ACH-000969	8.59455	KM12	Colon/Colorectal Cancer	Colorectal	Colorectal Adenocarcinoma
ACH-000970	9.61802	SNUC5	Colon/Colorectal Cancer	Colorectal	Colorectal Adenocarcinoma
ACH-000971	10.1066	HCT116	Colon/Colorectal Cancer	Colorectal	Colorectal Adenocarcinoma
ACH-000972	9.68524	HEC151	Endometrial/Uterine Cancer	Uterus	Endometrial Adenocarcinoma
ACH-000973	10.0731	639V	Bladder Cancer	Urinary Tract	Bladder Carcinoma
ACH-000974	8.50076	SNGM	Endometrial/Uterine Cancer	Uterus	Endometrial Adenocarcinoma
ACH-000975	10.2425	HCC2450	Lung Cancer	Lung	NSCLC
ACH-000976	8.71469	HUCCT1	Bile Duct Cancer	Bile Duct	Cholangiocarcinoma
ACH-000977	8.86521	LNCAPCLONEFGC	Prostate Cancer	Prostate	Prostate Adenocarcinoma
ACH-000978	8.73139	EN	Endometrial/Uterine Cancer	Uterus	Endometrial Adenocarcinoma
ACH-000980	10.3897	NCIH1155	Lung Cancer	Lung	NSCLC
ACH-000981	9.73379	DND41	Leukemia	Blood	ALL
ACH-000982	9.92138	GP2D	Colon/Colorectal Cancer	Colorectal	Colorectal Adenocarcinoma
ACH-000983	9.77421	KCL22	Leukemia	Blood	CML
ACH-000984	10.1381	HEC6	Endometrial/Uterine Cancer	Uterus	Endometrial Adenocarcinoma
ACH-000985	9.17759	LS411N	Colon/Colorectal Cancer	Colorectal	Colorectal Adenocarcinoma
ACH-000986	8.91791	HT115	Colon/Colorectal Cancer	Colorectal	Colorectal Adenocarcinoma
ACH-000987	9.53387	MEWO	Skin Cancer	Skin	Melanoma
ACH-000988	9.31673	MFE319	Endometrial/Uterine Cancer	Uterus	Endometrial Adenocarcinoma
ACH-000989	9.60713	SNU175	Colon/Colorectal Cancer	Colorectal	Colorectal Adenocarcinoma
ACH-000990	9.03254	HEC108	Endometrial/Uterine Cancer	Uterus	Endometrial Adenocarcinoma
ACH-000991	9.09598	SNU81	Colon/Colorectal Cancer	Colorectal	Colorectal Adenocarcinoma
ACH-000993	8.76454	JHUEM7	Endometrial/Uterine Cancer	Uterus	Endometrial Adenocarcinoma
ACH-000994	10.0169	HEC59	Endometrial/Uterine Cancer	Uterus	Endometrial Adenocarcinoma
ACH-000995	9.08401	JURKAT	Leukemia	Blood	ALL
ACH-000996	9.52491	HEC251	Endometrial/Uterine Cancer	Uterus	Endometrial Adenocarcinoma
ACH-000997	10.1538	HCT15	Colon/Colorectal Cancer	Colorectal	Colorectal Adenocarcinoma
ACH-000998	9.18093	CW2	Colon/Colorectal Cancer	Colorectal	Colorectal Adenocarcinoma
ACH-000999	8.8485	SNU1040	Colon/Colorectal Cancer	Colorectal	Colorectal Adenocarcinoma
ACH-001001	9.90982	143B	Bone Cancer	Bone	Osteosarcoma
ACH-001016	9.94857	BECKER	Brain Cancer	Central Nervous System	Glioma
ACH-001020	9.99379	BT16	Rhabdoid	Soft Tissue	ATRT
ACH-001022	9.85737	CBAGPN	Bone Cancer	Bone	Ewing Sarcoma
ACH-001028	6.98846	CHLA06ATRT	Rhabdoid	Soft Tissue	ATRT
ACH-001029	10.2203	CHLA10	Bone Cancer	Bone	Ewing Sarcoma
ACH-001030	10.5882	CHLA218	Bone Cancer	Bone	Ewing Sarcoma
ACH-001031	10.1192	CHLA266	Rhabdoid	Soft Tissue	ATRT
ACH-001032	9.3439	CHLA32	Bone Cancer	Bone	Ewing Sarcoma
ACH-001033	10.2238	CHLA57	Unknown	Central Nervous System	PNET
ACH-001034	10.3679	CHLA9	Bone Cancer	Bone	Ewing Sarcoma
ACH-001035	10.1939	CHLA99	Bone Cancer	Bone	Ewing Sarcoma
ACH-001036	9.75886	CMK115	Leukemia	Blood	AML
ACH-001038	10.5263	COGE352	Bone Cancer	Bone	Ewing Sarcoma
ACH-001041	9.93291	CHL1DM	Skin Cancer	Skin	Melanoma
ACH-001048	9.59141	COV504	Ovarian Cancer	Ovary	Ovary Adenocarcinoma
ACH-001050	9.92459	CW9019	Sarcoma	Soft Tissue	Rhabdomyosarcoma
ACH-001053	8.60999	D425	Brain Cancer	Central Nervous System	Medulloblastoma
ACH-001054	9.98712	D458	Brain Cancer	Central Nervous System	Medulloblastoma
ACH-001057	9.27293	DERL2	Lymphoma	Lymphocyte	Lymphoma Unspecified
ACH-001059	9.42259	DL	Rhabdoid	Soft Tissue	Malignant Rhabdoid Tumor
ACH-001060	10.8787	DL40	Lymphoma	Lymphocyte	Lymphoma Unspecified
ACH-001061	9.8009	DLD1	Colon/Colorectal Cancer	Colorectal	Colorectal Adenocarcinoma
ACH-001067	9.82439	F5	Brain Cancer	Central Nervous System	Meningioma
ACH-001068	8.27743	FEPD	Lymphoma	Lymphocyte	Lymphoma Unspecified
ACH-001075	9.54034	NCIH292	Lung Cancer	Lung	NSCLC
ACH-001086	9.63149	HELA	Cervical Cancer	Cervix	Cervical Carcinoma
ACH-001096	10.044	JR	Sarcoma	Soft Tissue	Rhabdomyosarcoma
ACH-001097	7.64046	KARPAS384	Lymphoma	Lymphocyte	Lymphoma Unspecified
ACH-001098	9.30072	KCIMOH1	Pancreatic Cancer	Pancreas	Exocrine
ACH-001099	9.51197	KD	Rhabdoid	Soft Tissue	Malignant Rhabdoid Tumor
ACH-001100	6.54767	KHYG	Lymphoma	Lymphocyte	Lymphoma Unspecified
ACH-001106	9.45876	KOPN8	Leukemia	Blood	ALL
ACH-001109	9.75661	KPMRTRY	Rhabdoid	Soft Tissue	Malignant Rhabdoid Tumor
ACH-001111	9.26346	L82	Lymphoma	Lymphocyte	Lymphoma Unspecified
ACH-001113	9.72688	LC1SQSF	Lung Cancer	Lung	NSCLC
ACH-001119	8.61916	MAC2A	Lymphoma	Lymphocyte	Lymphoma Unspecified
ACH-001128	9.80116	MON	Rhabdoid	Soft Tissue	Malignant Rhabdoid Tumor
ACH-001129	9.37558	MONOMAC1	Leukemia	Blood	AML
ACH-001132	9.35151	MTA	Lymphoma	Lymphocyte	Lymphoma Unspecified
ACH-001134	7.54164	MYLA	Lymphoma	Lymphocyte	Lymphoma Unspecified
ACH-001142	9.16543	NHAHTDD	Non-Cancerous	Central Nervous System
ACH-001145	10.1532	OC316	Ovarian Cancer	Ovary	Ovary Adenocarcinoma
ACH-001147	8.48273	OCILY12	Lymphoma	Lymphocyte	Lymphoma Unspecified
ACH-001148	9.75564	OCILY132	Lymphoma	Lymphocyte	Lymphoma Unspecified
ACH-001151	10.0289	OVCAR5	Ovarian Cancer	Ovary	Ovary Adenocarcinoma
ACH-001163	9.42299	CCLFPEDS0001T	Kidney Cancer	Kidney	Renal Cell Carcinoma
ACH-001164	8.95606	CCLFPEDS0003T	Sarcoma	Soft Tissue	Undifferentiated Sarcoma
ACH-001172	9.80924	U251MGDM	Brain Cancer	Central Nervous System	Glioma
ACH-001183	10.0538	RT11284	Bladder Cancer	Urinary Tract	Bladder Carcinoma
ACH-001184	9.90773	SCMCRM2	Sarcoma	Soft Tissue	Rhabdomyosarcoma
ACH-001188	9.88548	SHSY5Y	Neuroblastoma	Peripheral Nervous System	Neuroblastoma
ACH-001190	10.4109	SKMEL2	Skin Cancer	Skin	Melanoma
ACH-001192	10.6068	SKNEP1	Bone Cancer	Bone	Ewing Sarcoma
ACH-001193	10.3753	SKPNDW	Bone Cancer	Bone	Ewing Sarcoma
ACH-001194	10.2369	SKRC31	Kidney Cancer	Kidney	Renal Cell Carcinoma
ACH-001196	9.86225	SMSCTR	Sarcoma	Soft Tissue	Rhabdomyosarcoma
ACH-001197	10.3132	SMZ1	Lymphoma	Lymphocyte	Lymphoma Unspecified
ACH-001200	9.24174	STM9101	Rhabdoid	Soft Tissue	Malignant Rhabdoid Tumor
ACH-001201	9.03755	SUMB002	Brain Cancer	Central Nervous System	Medulloblastoma
ACH-001207	9.30599	TIG3TD	Non-Cancerous	Fibroblast	Fibroblast Lung
ACH-001210	9.54454	TTC1240	Rhabdoid	Soft Tissue	Malignant Rhabdoid Tumor
ACH-001211	10.0589	TTC549	Rhabdoid	Soft Tissue	Malignant Rhabdoid Tumor
ACH-001228	10.0554	UPCISCC152	Head and Neck Cancer	Upper Aerodigestive	Upper Aerodigestive Squamous
ACH-001229	9.14929	UPCISCC154	Head and Neck Cancer	Upper Aerodigestive	Upper Aerodigestive Squamous
ACH-001232	10.0831	UW228	Brain Cancer	Central Nervous System	Medulloblastoma
ACH-001239	10.0403	WM2664	Skin Cancer	Skin	Melanoma
ACH-001270	10.0121	127399	Sarcoma	Soft Tissue	Synovial Sarcoma
ACH-001274	9.87813	SW982	Sarcoma	Soft Tissue	Synovial Sarcoma
ACH-001275	10.0833	SYO1	Sarcoma	Soft Tissue	Synovial Sarcoma
ACH-001277	10.0156	YAMATO	Sarcoma	Soft Tissue	Synovial Sarcoma
ACH-001278	9.50311	BIN67	Ovarian Cancer	Ovary	SCCOHT
ACH-001279	9.67085	SCCOHT1	Ovarian Cancer	Ovary	SCCOHT
ACH-001280	9.78888	SCS214	Sarcoma	Soft Tissue	Synovial Sarcoma
ACH-001283	9.90482	TC106	Bone Cancer	Bone	Ewing Sarcoma
ACH-001289	10.3333	COGAR359	Rhabdoid	Soft Tissue	ATRT
ACH-001295	10.4184	Y79	Eye Cancer	Eye	Retinoblastoma
ACH-001300	10.1231	CHLA15	Neuroblastoma	Peripheral Nervous System	Neuroblastoma
ACH-001301	9.93078	COGN278	Neuroblastoma	Peripheral Nervous System	Neuroblastoma
ACH-001302	9.8627	COGN305	Neuroblastoma	Peripheral Nervous System	Neuroblastoma
ACH-001303	9.64807	NB1643	Neuroblastoma	Peripheral Nervous System	Neuroblastoma
ACH-001306	8.85978	8305C	Thyroid Cancer	Thyroid	Thyroid Carcinoma
ACH-001307	9.85276	8505C	Thyroid Cancer	Thyroid	Thyroid Carcinoma
ACH-001310	9.73951	HA1E	Non-Cancerous	Kidney
ACH-001318	9.50742	PLCPRF5	Liver Cancer	Liver	Hepatocellular Carcinoma
ACH-001321	9.35515	TT	Thyroid Cancer	Thyroid	Thyroid Squamous
ACH-001322	9.68795	CME1	Sarcoma	Soft Tissue	Synovial Sarcoma
ACH-001328	9.50783	A431	Skin Cancer	Skin	Skin Squamous
ACH-001329	9.50299	ANGMCSS	Brain Cancer	Central Nervous System	Glioma
ACH-001332	9.56716	BICR78	Head and Neck Cancer	Upper Aerodigestive	Upper Aerodigestive Squamous
ACH-001333	10.3902	C33A	Cervical Cancer	Cervix	Cervical Carcinoma
ACH-001334	8.74268	C4I	Cervical Cancer	Cervix	Cervical Carcinoma
ACH-001335	9.71718	C4II	Cervical Cancer	Cervix	Cervical Carcinoma
ACH-001336	8.68731	CASKI	Cervical Cancer	Cervix	Cervical Squamous
ACH-001338	9.64386	CHP134	Neuroblastoma	Peripheral Nervous System	Neuroblastoma
ACH-001339	9.98627	COLO794	Skin Cancer	Skin	Melanoma
ACH-001340	9.9006	COV413A	Ovarian Cancer	Ovary	Ovary Carcinoma
ACH-001341	9.36497	DOTC24510	Cervical Cancer	Cervix	Cervical Adenocarcinoma
ACH-001344	8.487	GIMEN	Neuroblastoma	Peripheral Nervous System	Neuroblastoma
ACH-001345	10.0796	GP5D	Colon/Colorectal Cancer	Colorectal	Colorectal Adenocarcinoma
ACH-001346	9.03867	H103	Head and Neck Cancer	Upper Aerodigestive	Upper Aerodigestive Squamous
ACH-001347	8.40045	H157	Head and Neck Cancer	Upper Aerodigestive	Upper Aerodigestive Squamous
ACH-001353	8.89403	JOPACA1	Pancreatic Cancer	Pancreas	Exocrine
ACH-001354	9.82852	LAN2	Neuroblastoma	Peripheral Nervous System	Neuroblastoma
ACH-001356	10.0779	MB1	Thyroid Cancer	Thyroid	Thyroid Carcinoma
ACH-001360	8.545	MS751	Cervical Cancer	Cervix	Cervical Squamous
ACH-001366	9.90826	NGP	Neuroblastoma	Peripheral Nervous System	Neuroblastoma
ACH-001367	10.2855	NMB	Neuroblastoma	Peripheral Nervous System	Neuroblastoma
ACH-001368	9.31188	OACM51	Esophageal Cancer	Esophagus	Esophagus Adenocarcinoma
ACH-001369	8.40642	OCIC5X	Ovarian Cancer	Ovary	Ovary Adenocarcinoma
ACH-001370	8.37912	OCIP5X	Ovarian Cancer	Ovary	Ovary Adenocarcinoma
ACH-001373	9.36354	OV17R	Ovarian Cancer	Ovary	Ovary Adenocarcinoma
ACH-001374	10.2891	PA1	Ovarian Cancer	Ovary	Mixed Germ Cell
ACH-001375	10.2138	PACADD119	Pancreatic Cancer	Pancreas	Exocrine
ACH-001376	9.15927	PACADD135	Pancreatic Cancer	Pancreas	Exocrine
ACH-001377	9.5126	PACADD137	Pancreatic Cancer	Pancreas	Exocrine
ACH-001378	7.8346	PACADD159	Pancreatic Cancer	Pancreas	Exocrine
ACH-001379	9.42945	PACADD161	Pancreatic Cancer	Pancreas	Exocrine
ACH-001380	9.10242	PACADD165	Pancreatic Cancer	Pancreas	Exocrine
ACH-001382	9.05192	PACADD188	Pancreatic Cancer	Pancreas	Exocrine
ACH-001384	8.74547	RO82W1	Thyroid Cancer	Thyroid	Thyroid Carcinoma
ACH-001385	9.13404	RPMI2650	Head and Neck Cancer	Upper Aerodigestive	Upper Aerodigestive Squamous
ACH-001386	10.3491	SCLC22H	Lung Cancer	Lung	SCLC
ACH-001388	5.31651	SUM102PT	Breast Cancer	Breast	Breast Carcinoma
ACH-001389	9.32188	SUM1315MO2	Breast Cancer	Breast	Breast Ductal Carcinoma
ACH-001390	8.25946	SUM149PT	Breast Cancer	Breast	Breast Ductal Carcinoma
ACH-001391	8.61327	SUM159PT	Breast Cancer	Breast	Breast Carcinoma
ACH-001392	8.35416	SUM185PE	Breast Cancer	Breast	Breast Carcinoma
ACH-001393	8.69279	SUM190PT	Breast Cancer	Breast	Breast Carcinoma
ACH-001394	9.07593	SUM229PE	Breast Cancer	Breast	Breast Carcinoma
ACH-001395	8.34465	SUM44PE	Breast Cancer	Breast	Breast Carcinoma
ACH-001396	8.10915	SUM52PE	Breast Cancer	Breast	Breast Carcinoma
ACH-001398	9.54643	SW156	Kidney Cancer	Kidney	Renal Cell Carcinoma
ACH-001399	9.91292	SW626	Colon/Colorectal Cancer	Colorectal	Colorectal Adenocarcinoma
ACH-001400	6.95117	SW954	Cervical Cancer	Cervix	Cervical Squamous
ACH-001401	9.65494	SW13	Adrenal Cancer	Adrenal Cortex	Adrenal Carcinoma
ACH-001402	10.29	SW756	Cervical Cancer	Cervix	Cervical Squamous
ACH-001403	9.92074	TO14	Ovarian Cancer	Ovary	Ovary Adenocarcinoma
ACH-001407	10.3433	UMUC13	Bladder Cancer	Urinary Tract	Bladder Carcinoma
ACH-001408	9.71261	UMUC14	Bladder Cancer	Urinary Tract	Bladder Carcinoma
ACH-001409	9.89874	UMUC16	Bladder Cancer	Urinary Tract	Bladder Carcinoma
ACH-001410	10.0304	UMUC4	Bladder Cancer	Urinary Tract	Bladder Carcinoma
ACH-001411	9.72886	UMUC5	Bladder Cancer	Urinary Tract	Bladder Carcinoma
ACH-001412	9.93192	UMUC10	Bladder Cancer	Urinary Tract	Bladder Carcinoma
ACH-001413	9.35087	UMUC11	Bladder Cancer	Urinary Tract	Bladder Carcinoma
ACH-001414	9.06132	UMUC6	Bladder Cancer	Urinary Tract	Bladder Carcinoma
ACH-001415	10.2839	UMUC7	Bladder Cancer	Urinary Tract	Bladder Carcinoma
ACH-001416	9.57788	UMUC9	Bladder Cancer	Urinary Tract	Bladder Carcinoma
ACH-001418	8.55394	UWB1289	Ovarian Cancer	Ovary	Ovary Adenocarcinoma
ACH-001419	8.81465	VP229	Breast Cancer	Breast	Breast Ductal Carcinoma
ACH-001421	10.8764	WERIRB1	Eye Cancer	Eye	Retinoblastoma
ACH-001422	8.72547	WPE1NA22	Prostate Cancer	Prostate	Prostate Adenocarcinoma
ACH-001430	10.4093	TC138	Bone Cancer	Bone	Ewing Sarcoma
ACH-001431	10.3565	TC205	Bone Cancer	Bone	Ewing Sarcoma
ACH-001433	9.21529	CCLFPEDS0008T	Sarcoma	Soft Tissue	Epithelioid Sarcoma
ACH-001441	8.59171	921	Eye Cancer	Eye	Uveal Melanoma
ACH-001442	9.27179	A388	Skin Cancer	Epidermoid Carcinoma	Skin Squamous
ACH-001443	9.28543	ASH3	Thyroid Cancer	Thyroid	Thyroid Carcinoma
ACH-001450	9.49303	BLUE1	Lymphoma	Lymphocyte	Non Hodgkin Lymphoma
ACH-001451	9.70498	BOKU	Cervical Cancer	Cervix	Cervical Squamous
ACH-001453	9.31721	BPH1	Prostate Cancer	Prostate	Prostate Hyperplasia
ACH-001454	9.57116	C10	Colon/Colorectal Cancer	Colorectal	Colorectal Adenocarcinoma
ACH-001456	8.78712	C125PM	Colon/Colorectal Cancer	Colorectal	Colorectal Adenocarcinoma
ACH-001458	9.12368	C75	Colon/Colorectal Cancer	Colorectal	Colorectal Adenocarcinoma
ACH-001459	9.248	C80	Colon/Colorectal Cancer	Colorectal	Colorectal Adenocarcinoma
ACH-001460	9.44112	C84	Colon/Colorectal Cancer	Colorectal	Colorectal Adenocarcinoma
ACH-001461	9.0009	C99	Colon/Colorectal Cancer	Colorectal	Colorectal Adenocarcinoma
ACH-001484	9.30154	CI	Leukemia	Blood	Unspecified Leukemia
ACH-001485	8.76686	CII	Leukemia	Blood	Unspecified Leukemia
ACH-001494	7.54705	EGI1	Bile Duct Cancer	Bile Duct	Cholangiocarcinoma
ACH-001495	9.64872	EMTOKA	Endometrial/Uterine Cancer	Uterus	Uterine Carcinosarcoma
ACH-001496	9.90627	ESO26	Esophageal Cancer	Esophagus	Esophagus Adenocarcinoma
ACH-001497	8.88062	ESO51	Esophageal Cancer	Esophagus	Esophagus Adenocarcinoma
ACH-001498	9.61706	FARAGE	Lymphoma	Lymphocyte	Non Hodgkin Lymphoma
ACH-001500	9.97197	FLO1	Esophageal Cancer	Esophagus	Esophagus Adenocarcinoma
ACH-001509	8.75766	H357	Head and Neck Cancer	Upper Aerodigestive	Upper Aerodigestive Squamous
ACH-001510	8.14578	H376	Head and Neck Cancer	Upper Aerodigestive	Upper Aerodigestive Squamous
ACH-001511	9.00056	H413	Head and Neck Cancer	Upper Aerodigestive	Upper Aerodigestive Squamous
ACH-001513	8.34367	HCA1	Cervical Cancer	Cervix	Cervical Adenocarcinoma
ACH-001515	10.1513	HCS2	Cervical Cancer	Cervix	Cervical Squamous
ACH-001516	10.3993	HCSC1	Cervical Cancer	Cervix	Cervical Carcinoma
ACH-001517	9.6127	HEC1	Endometrial/Uterine Cancer	Uterus	Endometrial Adenocarcinoma
ACH-001518	8.61747	HEC116	Endometrial/Uterine Cancer	Uterus	Endometrial Adenocarcinoma
ACH-001519	9.36691	HEMCSS	Bone Cancer	Bone	Chondrosarcoma
ACH-001520	8.50108	HG3	Leukemia	Blood	Unspecified Leukemia
ACH-001521	9.96051	HKA1	Skin Cancer	Skin	Skin Squamous
ACH-001522	9.28917	HMY1	Skin Cancer	Skin	Melanoma
ACH-001523	9.16284	HSC1	Skin Cancer	Skin	Skin Squamous
ACH-001524	8.68982	HSC5	Skin Cancer	Skin	Skin Squamous
ACH-001525	8.52497	HT3	Cervical Cancer	Cervix	Cervical Carcinoma
ACH-001526	9.76092	HUO9	Bone Cancer	Bone	Osteosarcoma
ACH-001528	9.31927	IHH4	Thyroid Cancer	Thyroid	Thyroid Carcinoma
ACH-001529	9.47476	JAR	Endometrial/Uterine Cancer	Uterus	Choriocarcinoma
ACH-001530	10.2212	JEG3	Endometrial/Uterine Cancer	Uterus	Choriocarcinoma
ACH-001532	8.86149	JMURTK2	Rhabdoid	Kidney	Malignant Rhabdoid Tumor
ACH-001533	9.90543	KARPAS1718	Lymphoma	Lymphocyte	Non Hodgkin Lymphoma
ACH-001536	7.77755	KKU100	Bile Duct Cancer	Bile Duct	Cholangiocarcinoma
ACH-001538	9.25477	KKU213	Bile Duct Cancer	Bile Duct	Cholangiocarcinoma
ACH-001539	9.12337	KML1	Lymphoma	Lymphocyte	Non Hodgkin Lymphoma
ACH-001540	7.4582	KMLS1	Liposarcoma	Soft Tissue	Liposarcoma
ACH-001541	9.17358	KMS28PE	Myeloma	Plasma Cell	Multiple Myeloma
ACH-001542	8.91519	KON	Head and Neck Cancer	Upper Aerodigestive	Upper Aerodigestive Squamous
ACH-001543	8.36444	KOSC2	Head and Neck Cancer	Upper Aerodigestive	Upper Aerodigestive Squamous
ACH-001547	9.67911	LO68	Lung Cancer	Lung	Mesothelioma
ACH-001548	10.2555	LS	Neuroblastoma	Peripheral Nervous System	Neuroblastoma
ACH-001549	10.0747	LU135	Lung Cancer	Lung	SCLC
ACH-001550	9.97613	MCC13	Skin Cancer	Skin	Merkel Cell Carcinoma
ACH-001551	9.72282	MCC142	Skin Cancer	Skin	Merkel Cell Carcinoma
ACH-001552	10.0018	MCC26	Skin Cancer	Skin	Merkel Cell Carcinoma
ACH-001554	9.71217	MEL202	Eye Cancer	Eye	Uveal Melanoma
ACH-001555	8.58549	MERO14	Lung Cancer	Lung	Mesothelioma
ACH-001556	10.0007	MERO25	Lung Cancer	Lung	Mesothelioma
ACH-001557	9.82228	MERO41	Lung Cancer	Lung	Mesothelioma
ACH-001558	9.9143	MERO48A	Lung Cancer	Lung	Mesothelioma
ACH-001559	10.4633	MERO82	Lung Cancer	Lung	Mesothelioma
ACH-001560	9.51161	MERO83	Lung Cancer	Lung	Mesothelioma
ACH-001561	9.28949	MERO84	Lung Cancer	Lung	Mesothelioma
ACH-001562	9.63394	MERO95	Lung Cancer	Lung	Mesothelioma
ACH-001563	9.76895	MM127	Skin Cancer	Skin	Melanoma
ACH-001566	9.5392	MM370	Skin Cancer	Skin	Melanoma
ACH-001567	10.2301	MM383	Skin Cancer	Skin	Melanoma
ACH-001568	8.2965	MM386	Skin Cancer	Skin	Melanoma
ACH-001569	9.26078	MM415	Skin Cancer	Skin	Melanoma
ACH-001570	9.99421	MM426	Skin Cancer	Skin	Melanoma
ACH-001573	8.01614	MOLM1	Leukemia	Blood	CML
ACH-001574	8.72516	MOLM14	Leukemia	Blood	AML
ACH-001577	8.47784	MUTZ8	Leukemia	Blood	AML
ACH-001578	9.8245	NCCIT	Embryonal Cancer	Embryo	Embryo Carcinoma
ACH-001603	8.95594	NH12	Neuroblastoma	Peripheral Nervous System	Neuroblastoma
ACH-001605	9.89423	NO10	Brain Cancer	Central Nervous System	Glioma
ACH-001607	9.67488	NOZ	Gallbladder Cancer	Bile Duct	Gallbladder Adenocarcinoma
ACH-001608	10.0497	NP2	Brain Cancer	Central Nervous System	Glioma
ACH-001609	9.28091	NP3	Brain Cancer	Central Nervous System	Glioma
ACH-001610	9.22328	NP5	Brain Cancer	Central Nervous System	Glioma
ACH-001611	9.00812	NP8	Brain Cancer	Central Nervous System	Glioma
ACH-001613	9.32531	OCIAML4	Leukemia	Blood	AML
ACH-001616	9.025	OCILY18	Lymphoma	Lymphocyte	Non Hodgkin Lymphoma
ACH-001617	9.52908	OCILY7	Lymphoma	Lymphocyte	Non Hodgkin Lymphoma
ACH-001618	9.97441	OCIM2	Leukemia	Blood	AML
ACH-001619	9.47393	OCUG1	Gallbladder Cancer	Bile Duct	Gallbladder Adenocarcinoma
ACH-001622	9.53547	ONDA7	Brain Cancer	Central Nervous System	Glioma
ACH-001623	10.0526	ONDA8	Brain Cancer	Central Nervous System	Glioma
ACH-001624	8.9227	ONDA9	Brain Cancer	Central Nervous System	Glioma
ACH-001625	9.21607	OSC19	Head and Neck Cancer	Upper Aerodigestive	Upper Aerodigestive Squamous
ACH-001626	9.80032	OSC20	Head and Neck Cancer	Upper Aerodigestive	Upper Aerodigestive Squamous
ACH-001627	9.31123	P4E6	Prostate Cancer	Prostate	Prostate Adenocarcinoma
ACH-001628	10.1724	PEA1	Ovarian Cancer	Ovary	Ovary Adenocarcinoma
ACH-001630	8.87126	PEO1	Ovarian Cancer	Ovary	Ovary Adenocarcinoma
ACH-001632	8.37334	PEO4	Ovarian Cancer	Ovary	Ovary Adenocarcinoma
ACH-001634	9.22335	PGA1	Leukemia	Blood	CLL
ACH-001636	9.4684	RAMOS	Lymphoma	Lymphocyte	Non Hodgkin Lymphoma
ACH-001638	8.57399	RCK8	Lymphoma	Lymphocyte	Lymphoma Unspecified
ACH-001641	10.1215	SAT	Head and Neck Cancer	Upper Aerodigestive	Upper Aerodigestive Squamous
ACH-001642	6.90014	SCC3	Lymphoma	Lymphocyte	Non Hodgkin Lymphoma
ACH-001645	8.92113	SEKI	Skin Cancer	Skin	Melanoma
ACH-001647	9.30223	SHI1	Leukemia	Blood	AML
ACH-001648	8.40075	SHMAC4	Prostate Cancer	Prostate	Prostate Adenocarcinoma
ACH-001649	8.76838	SHMAC5	Prostate Cancer	Prostate	Prostate Adenocarcinoma
ACH-001650	9.68085	SISO	Cervical Cancer	Cervix	Cervical Adenocarcinoma
ACH-001651	9.26618	SKGI	Endometrial/Uterine Cancer	Uterus	Endometrial Squamous
ACH-001652	9.72409	SKGII	Endometrial/Uterine Cancer	Uterus	Endometrial Squamous
ACH-001653	8.02031	SKGT2	Gastric Cancer	Gastric	Gastric Adenocarcinoma
ACH-001654	10.4125	SKGT4	Esophageal Cancer	Esophagus	Esophagus Adenocarcinoma
ACH-001655	9.00059	SKN	Endometrial/Uterine Cancer	Uterus	Endometrial Squamous
ACH-001656	10.0616	SKNO1	Leukemia	Blood	AML
ACH-001664	10.3696	SNU638	Gastric Cancer	Gastric	Gastric Adenocarcinoma
ACH-001668	9.27312	SUSA	Teratoma	Embryo	Teratoma
ACH-001669	9.21291	TANOUE	Leukemia	Blood	ALL
ACH-001670	10.1836	TASK1	Brain Cancer	Peripheral Nervous System	PNET
ACH-001673	9.6953	TFK1	Bile Duct Cancer	Bile Duct	Cholangiocarcinoma
ACH-001674	10.3756	TGW	Neuroblastoma	Peripheral Nervous System	Neuroblastoma
ACH-001677	10.6714	U2904	Lymphoma	Lymphocyte	Lymphoma Unspecified
ACH-001685	9.56522	UHO1	Lymphoma	Lymphocyte	Hodgkin Lymphoma
ACH-001687	6.59559	UMRC3	Kidney Cancer	Kidney
ACH-001688	8.07023	UMRC7	Kidney Cancer	Kidney
ACH-001690	9.04922	UPCISCC026	Head and Neck Cancer	Upper Aerodigestive	Upper Aerodigestive Squamous
ACH-001692	9.22383	UPCISCC040	Head and Neck Cancer	Upper Aerodigestive	Upper Aerodigestive Squamous
ACH-001694	8.90914	UPCISCC074	Head and Neck Cancer	Upper Aerodigestive	Upper Aerodigestive Squamous
ACH-001696	7.10832	UPCISCC111	Head and Neck Cancer	Upper Aerodigestive	Upper Aerodigestive Squamous
ACH-001698	8.51743	UPCISCC116	Head and Neck Cancer	Upper Aerodigestive	Upper Aerodigestive Squamous
ACH-001699	9.26547	UPCISCC131	Head and Neck Cancer	Upper Aerodigestive	Upper Aerodigestive Squamous
ACH-001701	8.48736	UPCISCC200	Head and Neck Cancer	Upper Aerodigestive	Upper Aerodigestive Squamous
ACH-001702	10.1206	VAESBJ	Sarcoma	Soft Tissue	Epithelioid Sarcoma
ACH-001703	8.70207	VAL	Lymphoma	Lymphocyte	Non Hodgkin Lymphoma
ACH-001707	8.36715	WAOSEL	Leukemia	Blood	CLL
ACH-001709	10.1257	WSUNHL	Lymphoma	Lymphocyte	Lymphoma Unspecified
ACH-001711	9.97971	PFSK1	Brain Cancer	Central Nervous System	PNET
ACH-001712	8.63688	HS860T	Bone Cancer	Bone	Osteosarcoma
ACH-001715	10.1415	CAL72	Bone Cancer	Bone	Osteosarcoma
ACH-001716	9.80697	GOTO	Neuroblastoma	Peripheral Nervous System	Neuroblastoma
ACH-001719	9.37395	OCIC4P	Ovarian Cancer	Ovary	Ovary Adenocarcinoma
ACH-001735	8.60633	SEMK2	Leukemia	Blood	ALL
ACH-001736	8.9514	HB1119	Leukemia	Blood	ALL
ACH-001737	9.59343	CTV1DM	Leukemia	Blood	ALL
ACH-001740	10.2841	RH28	Sarcoma	Soft Tissue	Rhabdomyosarcoma
ACH-001743	9.99435	RC2	Sarcoma	Soft Tissue	Rhabdomyosarcoma
ACH-001745	9.75567	RHJT	Sarcoma	Soft Tissue	Rhabdomyosarcoma
ACH-001750	9.65903	TTC442	Sarcoma	Soft Tissue	Rhabdomyosarcoma
ACH-001751	9.84853	RH36	Sarcoma	Soft Tissue	Rhabdomyosarcoma
ACH-001765	9.69917	RH4	Sarcoma	Soft Tissue	Rhabdomyosarcoma
ACH-001786	9.17617	SNU1544	Colon/Colorectal Cancer	Colorectal	Colorectal Adenocarcinoma
ACH-001791	8.05262	LPS6	Liposarcoma	Soft Tissue	Liposarcoma
ACH-001793	9.5712	LPS27	Liposarcoma	Soft Tissue	Liposarcoma
ACH-001794	9.10748	93T449	Liposarcoma	Soft Tissue	Liposarcoma
ACH-001795	9.62196	94T778	Liposarcoma	Soft Tissue	Liposarcoma
ACH-001796	9.25751	95T1000	Liposarcoma	Soft Tissue	Liposarcoma
ACH-001799	10.046	LPS141	Liposarcoma	Soft Tissue	Liposarcoma
ACH-001802	9.92466	LPS853	Liposarcoma	Soft Tissue	Liposarcoma
ACH-001804	8.91253	LPS510	Liposarcoma	Soft Tissue	Liposarcoma
ACH-001807	8.52689	LPS067	Liposarcoma	Soft Tissue	Liposarcoma
ACH-001814	9.86672	OS252	Bone Cancer	Bone	Osteosarcoma
ACH-001818	7.91091	C396	Bone Cancer	Bone	Osteosarcoma
ACH-001819	9.56203	MFM223	Breast Cancer	Breast	Breast Ductal Carcinoma
ACH-001820	10.5441	COLO824	Breast Cancer	Breast
ACH-001834	9.24994	ICC10	Bile Duct Cancer	Bile Duct	Cholangiocarcinoma
ACH-001835	8.93351	ICC106	Bile Duct Cancer	Bile Duct	Cholangiocarcinoma
ACH-001836	9.50271	ICC108	Bile Duct Cancer	Bile Duct	Cholangiocarcinoma
ACH-001838	8.46593	ICC12	Bile Duct Cancer	Bile Duct	Cholangiocarcinoma
ACH-001839	9.0502	ICC137	Bile Duct Cancer	Bile Duct	Cholangiocarcinoma
ACH-001841	9.18492	ICC15	Bile Duct Cancer	Bile Duct	Cholangiocarcinoma
ACH-001842	9.59736	ICC2	Bile Duct Cancer	Bile Duct	Cholangiocarcinoma
ACH-001843	9.70408	ICC3	Bile Duct Cancer	Bile Duct	Cholangiocarcinoma
ACH-001844	9.17976	ICC4	Bile Duct Cancer	Bile Duct	Cholangiocarcinoma
ACH-001845	9.41223	ICC5	Bile Duct Cancer	Bile Duct	Cholangiocarcinoma
ACH-001846	9.44334	ICC6	Bile Duct Cancer	Bile Duct	Cholangiocarcinoma
ACH-001848	9.47125	ICC8	Bile Duct Cancer	Bile Duct	Cholangiocarcinoma
ACH-001849	8.64198	ICC9	Bile Duct Cancer	Bile Duct	Cholangiocarcinoma
ACH-001850	9.69479	G415	Gallbladder Cancer	Bile Duct	Gallbladder Adenocarcinoma
ACH-001852	8.96463	HKGZCC	Bile Duct Cancer	Bile Duct	Cholangiocarcinoma
ACH-001853	9.00481	KMCH1	Bile Duct Cancer	Bile Duct	Cholangiocarcinoma
ACH-001856	9.2262	RBE	Bile Duct Cancer	Bile Duct	Cholangiocarcinoma
ACH-001857	9.53046	SG231	Bile Duct Cancer	Bile Duct	Cholangiocarcinoma
ACH-001858	9.55764	SSP25	Bile Duct Cancer	Bile Duct	Cholangiocarcinoma
ACH-001861	8.68321	TGBC1TKB	Gallbladder Cancer	Bile Duct	Gallbladder Adenocarcinoma
ACH-001862	9.34707	TGBC52TKB	Bile Duct Cancer	Bile Duct	Cholangiocarcinoma
ACH-001863	10.1907	TKKK	Bile Duct Cancer	Bile Duct	Cholangiocarcinoma
ACH-001864	8.52525	YSCCC	Bile Duct Cancer	Bile Duct	Cholangiocarcinoma
ACH-001959	10.2705	CCLP1	Bile Duct Cancer	Bile Duct	Cholangiocarcinoma
ACH-001960	9.89332	CCSW1	Bile Duct Cancer	Bile Duct	Cholangiocarcinoma
ACH-001961	9.0618	GB2	Gallbladder Cancer	Bile Duct	Gallbladder Adenocarcinoma
ACH-001970	9.32351	MM253	Skin Cancer	Skin	Melanoma
ACH-001973	9.18254	MM485	Skin Cancer	Skin	Melanoma
ACH-001977	9.48234	NO36	Lung Cancer	Lung	Mesothelioma
ACH-001982	9.36741	NZM3	Skin Cancer	Skin	Melanoma
ACH-001991	10.3335	NZOV9	Ovarian Cancer	Ovary	Ovary Adenocarcinoma
ACH-001992	10.0229	ONE58	Lung Cancer	Lung	Mesothelioma
ACH-001993	9.39414	NALM16	Leukemia	Blood	ALL
ACH-001997	8.96708	ECC2	Bile Duct Cancer	Bile Duct	Cholangiocarcinoma
ACH-001999	8.92288	9505BIK	Pancreatic Cancer	Pancreas	Exocrine
ACH-002001	9.26959	A375SKINCJ1	Skin Cancer	Skin	Melanoma
ACH-002002	9.61939	A375SKINCJ2	Skin Cancer	Skin	Melanoma
ACH-002003	9.48702	A375SKINCJ3	Skin Cancer	Skin	Melanoma
ACH-002004	9.29685	UACC62SKINCJ1	Skin Cancer	Skin	Melanoma
ACH-002005	9.28244	SKMEL19	Skin Cancer	Skin	Melanoma
ACH-002011	9.6039	MP46	Eye Cancer	Eye	Uveal Melanoma
ACH-002014	8.78349	MEL270	Eye Cancer	Eye	Uveal Melanoma
ACH-002015	9.11372	MEL285	Eye Cancer	Eye	Uveal Melanoma
ACH-002016	9.53794	MEL290	Eye Cancer	Eye	Uveal Melanoma
ACH-002017	8.97983	OMM1	Eye Cancer	Eye	Uveal Melanoma
ACH-002018	9.16118	OMM25	Eye Cancer	Eye	Uveal Melanoma
ACH-002019	9.00655	HOKUG	Cervical Cancer	Cervix	Glassy Cell Carcinoma
ACH-002021	10.1187	T3M3	Endometrial/Uterine Cancer	Uterus	Choriocarcinoma
ACH-002023	9.68238	TGBC18TKB	Colon/Colorectal Cancer	Colorectal	Colorectal Adenocarcinoma
ACH-002024	9.85677	ECC4	Colon/Colorectal Cancer	Colorectal	Colorectal Adenocarcinoma
ACH-002025	9.26486	TT1TKB	Colon/Colorectal Cancer	Colorectal	Colorectal Adenocarcinoma
ACH-002026	8.83842	HHUA	Endometrial/Uterine Cancer	Uterus	Endometrial Adenocarcinoma
ACH-002027	7.76089	HOUAI	Endometrial/Uterine Cancer	Uterus	Endometrial Adenocarcinoma
ACH-002029	9.74618	SAS	Head and Neck Cancer	Upper Aerodigestive	Upper Aerodigestive Squamous
ACH-002038	9.94808	HSKTC	Ovarian Cancer	Ovary	Krukenberg Tumor
ACH-002039	9.75537	PK8	Pancreatic Cancer	Pancreas	Exocrine
ACH-002041	8.98396	HOTHC	Thyroid Cancer	Thyroid	Thyroid Carcinoma
ACH-002042	9.05056	T3M5	Thyroid Cancer	Thyroid	Thyroid Squamous
ACH-002044	10.4163	HSQ89	Head and Neck Cancer	Upper Aerodigestive	Upper Aerodigestive Squamous
ACH-002045	9.63236	HO1U1	Head and Neck Cancer	Upper Aerodigestive	Upper Aerodigestive Squamous
ACH-002046	10.0418	HTMMT	Endometrial/Uterine Cancer	Uterus	MMMT
ACH-002048	9.2698	RMSYM	Sarcoma	Soft Tissue	Rhabdomyosarcoma
ACH-002055	8.49249	TL1	Lymphoma	Lymphocyte	Non Hodgkin Lymphoma
ACH-002059	10.461	P30OHK	Leukemia	Blood	ALL
ACH-002061	9.02904	P2URK562	Leukemia	Blood	CML
ACH-002062	9.08775	SLVL	Lymphoma	Lymphocyte	Lymphoma Unspecified
ACH-002065	10.4506	HSPSS	Sarcoma	Central Nervous System	MPNST
ACH-002066	9.65564	HSSCH2	Sarcoma	Central Nervous System	MPNST
ACH-002067	9.04721	NOS1	Bone Cancer	Bone	Osteosarcoma
ACH-002069	9.46818	HSOS1	Bone Cancer	Bone	Osteosarcoma
ACH-002080	9.39438	TN2	Neuroblastoma	Peripheral Nervous System	Neuroblastoma
ACH-002084	9.83006	MMAC	Skin Cancer	Skin	Melanoma
ACH-002446	9.2829	CCLFUPGI0005T	Gastric Cancer	Gastric	Gastric Adenocarcinoma
ACH-002458	9.6708	HT144SKINFV1	Skin Cancer	Skin	Melanoma
ACH-002459	8.65682	HT144SKINFV3	Skin Cancer	Skin	Melanoma
ACH-002460	9.39543	HT144SKINFV2	Skin Cancer	Skin	Melanoma
ACH-002461	8.98214	RVH421SKINFV1	Skin Cancer	Skin	Melanoma
ACH-002462	9.72019	RPE1SS48	Non-Cancerous	Eye
ACH-002463	8.88307	RPE1SS77	Non-Cancerous	Eye
ACH-002464	9.57243	RPE1SS6	Non-Cancerous	Eye
ACH-002465	9.44915	RPE1SS119	Non-Cancerous	Eye
ACH-002466	9.15206	RPE1SS111	Non-Cancerous	Eye
ACH-002467	9.67839	RPE1SS51	Non-Cancerous	Eye
ACH-002471	10.3383	PSS008	Bone Cancer	Bone	Osteosarcoma
ACH-002475	10.1595	HAP1	Leukemia	Blood	CML
ACH-002508	8.92831	WM3211	Skin Cancer	Skin	Melanoma
ACH-002509	9.4817	WM4235	Skin Cancer	Skin	Melanoma
ACH-002510	9.09302	M040416	Skin Cancer	Skin	Melanoma
ACH-002511	9.98812	M140325	Skin Cancer	Skin	Melanoma
ACH-002512	9.88423	MM160113	Skin Cancer	Skin	Melanoma
ACH-002647	9.49159	CCC5	Gastric Cancer	Gastric
ACH-002659	9.14361	JVE127	Colon/Colorectal Cancer	Colorectal	Colorectal Adenocarcinoma
ACH-002664	9.91474	JVE253	Colon/Colorectal Cancer	Colorectal	Colorectal Adenocarcinoma
ACH-002669	9.75353	KP363T	Colon/Colorectal Cancer	Colorectal	Colorectal Adenocarcinoma
ACH-002672	9.54137	MAPACHS77	Pancreatic Cancer	Pancreas
ACH-002680	9.27128	170MGBA	Brain Cancer	Central Nervous System	Glioma
ACH-002687	8.66576	WM3772F	Eye Cancer	Eye	Uveal Melanoma
ACH-002693	8.93091	S462	Sarcoma	Peripheral Nervous System	MPNST
ACH-002710	9.46879	MPNST724	Sarcoma	Peripheral Nervous System	MPNST
ACH-002785	9.46626	NCCLMS1C1	Unknown	Soft Tissue	Leiomyosarcoma
ACH-002800	8.84772	NCCMPNST2C1	Unknown	Peripheral Nervous System	MPNST
ACH-002834	9.85784	PSS131R	Bone Cancer	Bone	Osteosarcoma
ACH-002847	9.63056	YUHOIN0650	Unknown	Unknown
ACH-002926	9.22766	UPMD1	Unknown	Unknown	Melanoma
